# Supplementary material for: Metal-free stereoselective addition of propiolic acids to ynamides: a concise synthetic route to highly substituted enediyne/dienyne-(E)-N,O-acetals
Source: Royal Society of Chemistry journal article supplement (doi:10.1039/d2nj01907h), 2022-01-01

# Metal-Free Stereoselective Addition of Propiolic acids to Ynamides: A Concise Synthetic Route to Highly Substituted Ene-Diyne-(E)-N,O-Acetals

Rangu Prasad, Suresh Kanikarapu, Shubham Dutta, Srinivas Vangara, and Akhila K. Sahoo\*

School of Chemistry, University of Hyderabad, Hyderabad 500046, India

*E-mail: [akhilchemistry12@gmail.com](mailto:akhilchemistry12@gmail.com); [akssc@uohyd.ac.in](mailto:akssc@uohyd.ac.in)*

## SUPPORTING INFORMATION

| <b>Table of Contents</b>                              | <b>Page</b> |
|-------------------------------------------------------|-------------|
| General Experimental Information                      | S2          |
| Materials                                             | S2          |
| Experimental Procedures, Spectral and Analytical data | S3-S26      |
| X-ray crystallographic data                           | S26-S29     |
| Hirshfeld surface analysis                            | S31-S33     |
| References                                            | S34         |
| NMR data                                              | S35-S144    |

## General Experimental Information

All the reactions were performed in oven-dried round bottom (RB) flasks. Commercial grade solvents were distilled prior to use. Column chromatography was performed using either 100-200 Mesh or 230-400 Mesh silica gel or neutral alumina. Thin layer chromatography (TLC) was performed on silica gel GF254 plates and alumina plates.

Proton, carbon, and fluorine nuclear magnetic resonance spectra ( $^1\text{H}$  NMR,  $^{13}\text{C}$  NMR, and  $^{19}\text{F}$  NMR) were recorded based on the resonating frequencies as follows: ( $^1\text{H}$  NMR, 400 MHz;  $^{13}\text{C}$  NMR, 101 MHz;  $^{19}\text{F}$  NMR, 376 MHz) and ( $^1\text{H}$  NMR, 500 MHz;  $^{13}\text{C}$  NMR, 126 MHz;  $^{19}\text{F}$  NMR, 470 MHz) having the solvent resonance as internal standard ( $^1\text{H}$  NMR,  $\text{CDCl}_3$  at 7.26 ppm;  $^{13}\text{C}$  NMR,  $\text{CDCl}_3$  at 77.0 ppm). Few cases tetramethylsilane (TMS) at 0.00 ppm was used as reference standard. Data for  $^1\text{H}$  NMR are reported as follows: chemical shift (ppm), multiplicity (s = singlet; bs= broad singlet; d = doublet; dd= doublet of doublet; bd= broad doublet; t = triplet; bt= broad triplet; q = quartet; m = multiplet; tt= triplet of triplet; dq= doublet of quartet), coupling constant,  $J$ , in (Hz), and integration. Data for  $^{13}\text{C}$  NMR,  $^{19}\text{F}$  NMR were reported in terms of chemical shift (ppm). IR spectra were reported in  $\text{cm}^{-1}$ . High resolution mass spectra were obtained in ESI mode. Melting points were determined by electro-thermal heating and are uncorrected. X-ray data was collected at 293 K using graphite monochromated Mo-K $\alpha$  radiation (0.71073 Å).

**Materials:** Unless otherwise noted, all the reagents and intermediates were obtained commercially and used without purification. 1,4-Dioxane, dichloromethane ( $\text{CH}_2\text{Cl}_2$ ; DCM), toluene, acetonitrile ( $\text{CH}_3\text{CN}$ ), 1,2-dichloroethane (DCE), and acetone were distilled over  $\text{CaH}_2$ . THF was freshly distilled over sodium/benzophenone ketyl under dry nitrogen. Propiolic acid was purchased from Sigma-Aldrich and used as received. Phenylpropionic acid and 2-thiophenepropionic acid were synthesized in our laboratory.

## Experimental Procedures

Following the reported procedures, the ynamides (**1a–1z**, **1za–1ze** and **5a–5l**)<sup>1</sup> were prepared (Table S1). Analytical and spectral data of these compounds are exactly matching with the reported values.

### General Procedure (GP-1):<sup>1</sup>

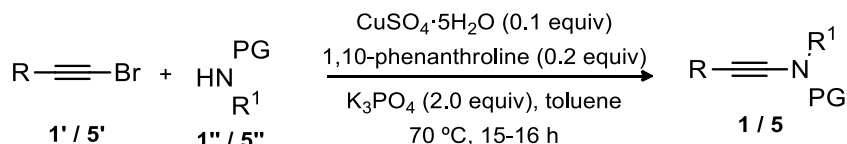

R = alkyl, aryl, hetero aryl groups;

R<sup>1</sup> = alkyl, aryl, allyl, propargyl, homo-propargyl groups

### General Procedure for the Synthesis of Ynamide **1** & **5** (GP 1):<sup>1</sup>

To a mixture of **1''** / **5''** (2.0 mmol), CuSO<sub>4</sub>·5H<sub>2</sub>O (0.1 equiv), 1,10-phenanthroline (0.2 equiv) in dry toluene (8.0 mL), was added K<sub>3</sub>PO<sub>4</sub> (2.0 equiv) portion wise. Subsequently, 1-bromo-2-arylacetylene **1'** / **5'** (2.4 mmol) was added. The reaction mixture was heated at 70 °C under nitrogen atmosphere. Progress of the reaction was monitored periodically by TLC. Upon completion, the reaction mixture was cooled to room temperature and diluted with dichloromethane (10 mL). The crude mixture was filtered through a small pad of Celite and concentrated under the reduced pressure. The crude residue was purified through column chromatography using ethyl acetate and hexane mixture on silica gel to provide **1** / **5**.

### General procedure for the preparation of propiolic acid derivatives **2b**, **2c** (GP 2):<sup>2</sup>

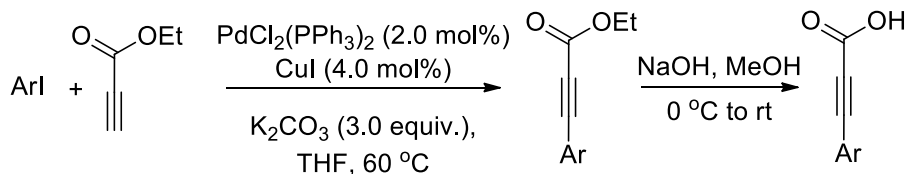

To a solution of aryl iodide (7.5 mmol), ethyl propiolate (5.0 mmol), and K<sub>2</sub>CO<sub>3</sub> (15 mmol) in THF (30 mL) was added PdCl<sub>2</sub>(PPh<sub>3</sub>)<sub>2</sub> (0.02 mmol) and CuI (0.04 mmol). The resulting mixture was then heated under a nitrogen atmosphere at 60 °C for 12 h. The reaction was monitored by TLC to establish the consumption of starting material. The mixture was then cooled to room

temperature, the solid was removed by filtration. The filtrate was diluted with EtOAc and washed with water.

The combined organic layer was washed with brine and dried over  $\text{Na}_2\text{SO}_4$ . The resultant crude material was directly subjected to hydrolysis by subjecting to aqueous  $\text{NaOH}$  (1M, 3.0 equiv) in  $\text{MeOH}$  (5 mL) at  $0\text{ }^\circ\text{C}$  and then allowed to warm to rt and stirred overnight. The reaction mixture was acidified to  $\text{pH} = 1$  by adding  $\text{HCl}$  (2M) and then extracted with  $\text{DCM}$  ( $1 \times 10\text{ mL}$ ). The organic layer was separated and the aqueous layer extracted with  $\text{CH}_2\text{Cl}_2$  ( $3 \times 10\text{ mL}$ ). The combined organic layers were dried over  $\text{MgSO}_4$  and evaporated to yield the respective arylpropionic acids.

**Table S1: List of Ynamides**

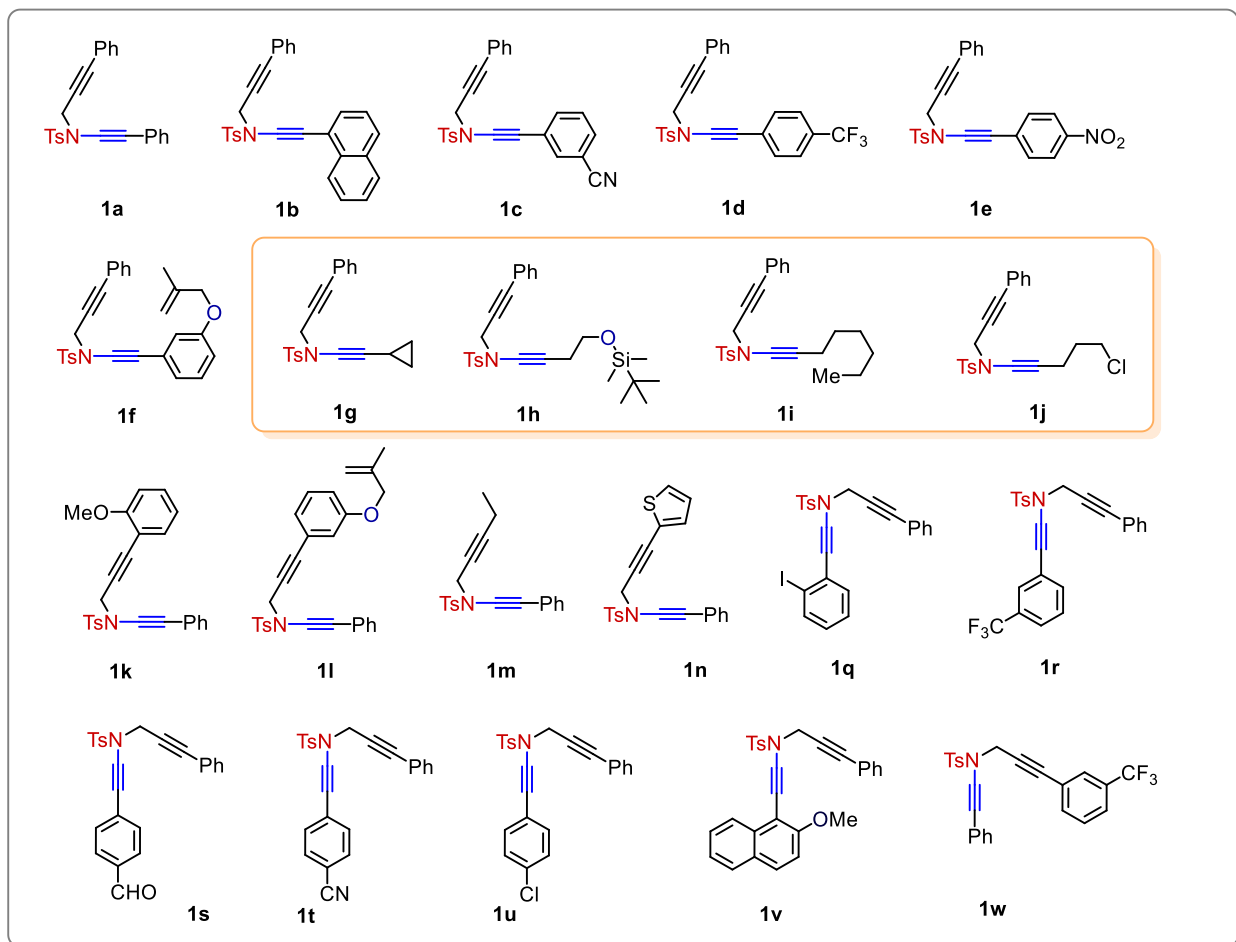

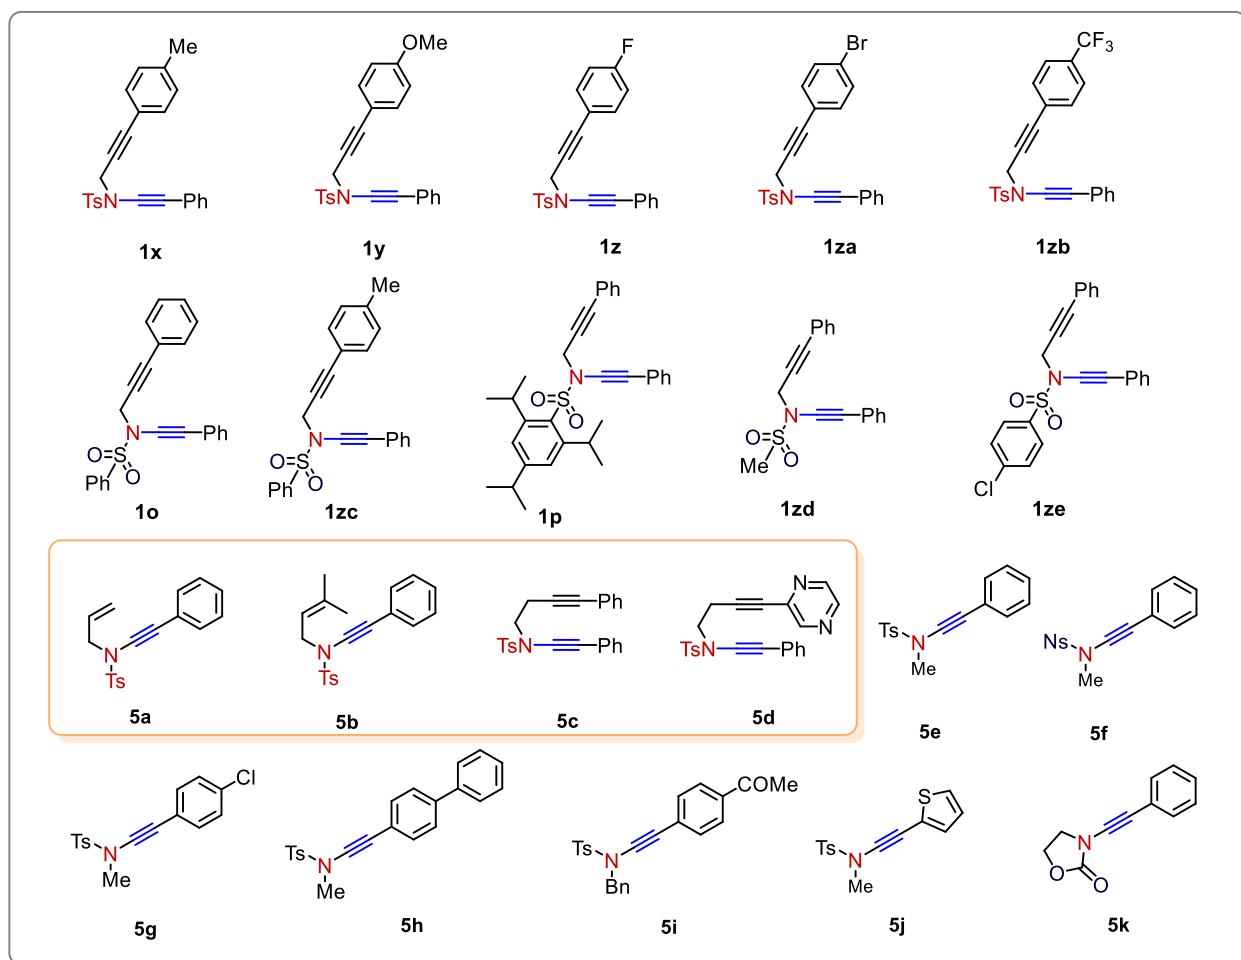

**General procedure for the chemo-, regio-, and stereoselective hydropropioloxylation of ynamide **1** with terminal propiolic acid **2a** (GP-3):**

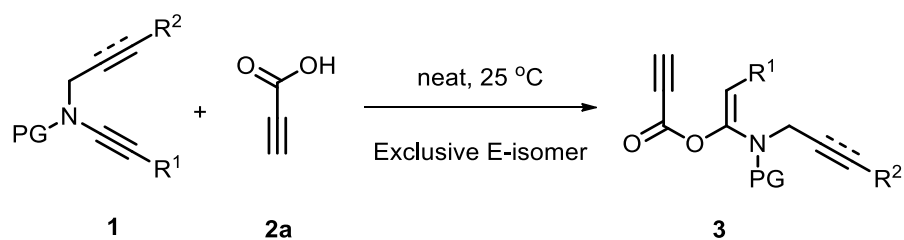

The ynamide **1** (0.3 mmol) was taken in an RB flask and then propiolic acid **2a** (0.36 mmol) was introduced drop wise. The reaction mixture was stirred at RT. The progress of the reaction was periodically monitored by TLC. After complete consumption of ynamide **1**, the reaction mixture was diluted with EtOAc and neutralized with saturated NaHCO<sub>3</sub> solution. The organic layer was

further extracted with EtOAc (10 mL) and dried over anhydrous Na<sub>2</sub>SO<sub>4</sub>. After evaporation of solvent under reduced pressure, the residue was purified by flash chromatography on silica gel (hexane/EtOAc) to afford the expected product **3**.

**(E)-1-(4-methyl-N-(3-phenylprop-2-yn-1-yl)phenylsulfonamido)-2-phenylvinyl propiolate (3a):**

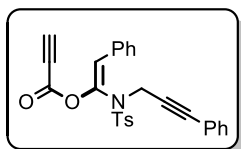

Following the general procedure GP-3, compound **3a** (134 mg) was obtained in 98% yield as colorless solid; mp= 124–126 °C;  $R_f$  = 0.49 (3:2 hexane/EtOAc); [Silica, UV and I<sub>2</sub>]; <sup>1</sup>H NMR (500 MHz, CDCl<sub>3</sub>): δ 7.86 (d,  $J$  = 8.5 Hz, 2H), 7.60 (d,  $J$  = 8.4 Hz, 2H), 7.39–7.27 (m, 3H), 7.26–7.15 (m, 5H), 7.08 (d,  $J$  = 7.0 Hz, 2H), 6.51 (s, 1H), 4.43 (s, 2H), 2.93 (s, 1H), 2.32 (s, 3H); <sup>13</sup>C NMR (126 MHz, CDCl<sub>3</sub>) δ 149.9, 144.3, 137.0, 136.0, 131.6, 131.4, 129.4, 128.84, 128.81, 128.6, 128.52, 128.3, 127.9, 123.5, 122.1, 86.0, 81.9, 77.3, 73.8, 39.8, 21.4.; IR (Neat) $\nu_{\max}$  1724, 1351, 1264, 1100, 1052, 732, 701 cm<sup>-1</sup>; HRMS (ESI) for C<sub>27</sub>H<sub>21</sub>NNaO<sub>4</sub>S (M+Na)<sup>+</sup>: calcd 478.1089, found 478.1084.

**(E)-1-(4-Methyl-N-(3-phenylprop-2-yn-1-yl)phenylsulfonamido)-2-(naphthalen-1-yl)vinyl propiolate (3b):**

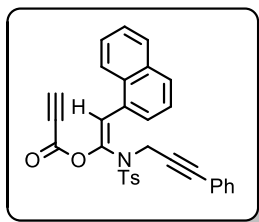

Following the general procedure GP-3, compound **3b** (146 mg) was obtained in 96% yield as colorless solid; mp = 126–128 °C;  $R_f$  = 0.51 (3:2 hexane/EtOAc); [Silica, UV and I<sub>2</sub>]; <sup>1</sup>H NMR (600 MHz, CDCl<sub>3</sub>): δ 7.99–7.89 (m, 2H), 7.87–7.76 (m, 2H), 7.72 (d,  $J$  = 8.4 Hz, 2H), 7.54–7.41 (m, 3H), 7.31–7.20 (m, 3H), 7.17–7.07 (m, 3H), 7.03 (d,  $J$  = 8.4 Hz, 2H), 4.33 (s, 2H), 3.07 (s, 1H), 2.25 (s, 3H); <sup>13</sup>C NMR (151 MHz, CDCl<sub>3</sub>) δ 150.0, 143.9, 138.8, 135.7, 133.3, 131.6, 131.4, 129.2, 128.8, 128.5, 128.4, 128.3, 128.0, 126.6, 126.4, 126.0, 125.5, 124.2, 122.1, 121.1, 85.9, 82.1, 77.5, 73.8, 40.0, 21.4; IR (Neat) $\nu_{\max}$  2128, 1748, 1351, 1157, 111.4, 1046, 685 cm<sup>-1</sup>; HRMS (ESI) for C<sub>31</sub>H<sub>24</sub>NO<sub>4</sub>S (M+H)<sup>+</sup>: calcd 506.1426, found 506.1423.

**(E)-2-(3-Cyanophenyl)-1-(4-methyl-N-(3-phenylprop-2-yn-1-yl)phenylsulfonamido)vinyl propiolate (3c):**

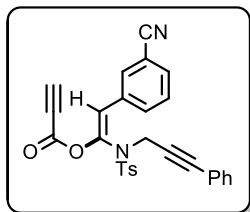

Following the general procedure GP-3, compound **3c** (137 mg) was obtained in 93% yield as colorless solid; mp = 129–131 °C;  $R_f$  = 0.43 (3:2 hexane/EtOAc); [Silica, UV and  $I_2$ ];  $^1\text{H NMR}$  (600 MHz,  $\text{CDCl}_3$ ):  $\delta$  7.88 (d,  $J$  = 7.8 Hz, 1H), 7.77 (d,  $J$  = 8.4 Hz, 2H), 7.73 (s, 1H), 7.50 (d,  $J$  = 7.8 Hz, 1H), 7.40 (t,  $J$  = 7.8 Hz, 1H), 7.27–7.17 (m, 5H), 7.10 (d,  $J$  = 7.2 Hz, 2H), 6.51 (s, 1H), 4.41 (s, 2H), 2.97 (s, 1H), 2.34 (s, 3H);  $^{13}\text{C NMR}$  (151 MHz,  $\text{CDCl}_3$ )  $\delta$  149.5, 144.8, 138.5, 135.2, 133.1, 132.8, 132.3, 132.2, 131.9, 131.6, 131.5, 129.7, 129.6, 129.5, 129.4, 128.6, 128.3, 128.04, 127.99, 121.80, 121.76, 118.3, 112.7, 86.5, 81.2, 77.9, 77.7, 73.4, 39.6, 21.5; IR (Neat) $\nu_{\text{max}}$  2227, 1745, 1509, 1349, 1272, 1159, 1099, 747, 625  $\text{cm}^{-1}$ ; HRMS (ESI) for  $\text{C}_{28}\text{H}_{21}\text{N}_2\text{O}_4\text{S}$  ( $\text{M}+\text{H}$ ) $^+$ : calcd 481.1222, found 481.1222.

**(E)-1-(4-Methyl-N-(3-phenylprop-2-yn-1-yl)phenylsulfonamido)-2-(4-(trifluoromethyl)phenyl)vinyl propiolate (3d):**

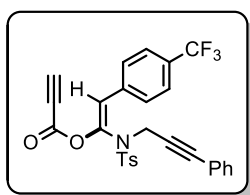

Following the general procedure GP-3, compound **3d** (151 mg) was obtained in 96% yield as colorless solid; mp = 121–123 °C;  $R_f$  = 0.46 (3:2 hexane/EtOAc); [Silica, UV and  $I_2$ ];  $^1\text{H NMR}$  (600 MHz,  $\text{CDCl}_3$ ):  $\delta$  7.79 (d,  $J$  = 7.8 Hz, 2H), 7.70 (d,  $J$  = 7.8 Hz, 2H), 7.55 (d,  $J$  = 7.8 Hz, 2H), 7.28–7.24 (m, 1H), 7.20 (t,  $J$  = 7.8 Hz, 4H), 7.08 (d,  $J$  = 6.6 Hz, 2H), 6.58 (s, 1H), 4.43 (s, 2H), 2.97 (s, 1H), 2.33 (s, 3H);  $^{13}\text{C NMR}$  (151 MHz,  $\text{CDCl}_3$ )  $\delta$  149.6, 144.6, 138.4, 135.5, 135.2, 131.5, 130.3 (q,  $J$  = 32 Hz, 1C), 129.5, 129.1, 128.6, 128.4, 128.0, 125.4, 123.9 (q,  $J$  = 272 Hz, 1C), 122.5, 121.9, 121.2, 86.3, 81.4, 77.6, 73.5, 39.7, 21.4;  $^{19}\text{F NMR}$  (471 MHz,  $\text{CDCl}_3$ )  $\delta$  -62.7; IR (Neat) $\nu_{\text{max}}$  2228, 1722, 1488, 1350, 1288, 1162, 1054, 737, 692  $\text{cm}^{-1}$ ; HRMS (ESI) for  $\text{C}_{28}\text{H}_{21}\text{F}_3\text{NO}_4\text{S}$  ( $\text{M}+\text{H}$ ) $^+$ : calcd 524.1143, found 524.1144.

**(E)-1-(4-Methyl-N-(3-phenylprop-2-yn-1-yl)phenylsulfonamido)-2-(4-nitrophenyl)vinyl propiolate (3e):**

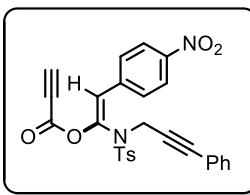

Following the general procedure GP-3, compound **3e** (140 mg) was obtained in 93% yield as colorless solid; mp = 135–137 °C;  $R_f$  = 0.39 (3:2 hexane/EtOAc); [Silica, UV and  $I_2$ ];  $^1\text{H NMR}$  (600 MHz,  $\text{CDCl}_3$ ):  $\delta$  8.14 (d,  $J$  = 9.0 Hz, 2H), 7.80 (d,  $J$  = 7.8 Hz, 2H), 7.76 (d,  $J$  = 9.0 Hz, 2H),

7.29–7.17 (m, 5H), 7.09 (d,  $J = 9.0$  Hz, 2H), 6.63 (s, 1H), 4.42 (s, 2H), 2.98 (s, 1H), 2.35 (s, 3H);  $^{13}\text{C}$  NMR (151 MHz,  $\text{CDCl}_3$ )  $\delta$  149.4, 147.3, 144.8, 139.4, 138.4, 135.3, 131.6, 131.5, 129.8, 129.6, 128.7, 128.4, 128.2, 128.0, 127.97, 123.8, 123.6, 121.7, 86.5, 81.2, 78.0, 73.3, 39.7, 21.5; IR (Neat) $\nu_{\text{max}}$  2125, 1722, 1524, 1347, 1163, 1026, 805, 668  $\text{cm}^{-1}$ ; HRMS (ESI) for  $\text{C}_{27}\text{H}_{21}\text{N}_2\text{O}_6\text{S}$  ( $\text{M}+\text{H}$ ) $^+$ : calcd 501.1120, found 501.1121.

**(E)-1-(4-Methyl-N-(3-phenylprop-2-yn-1-yl)phenylsulfonamido)-2-(3-((2-methylallyl)oxy)phenyl)vinyl propiolate (3f):**

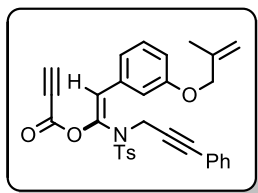

Following the general procedure GP-3, compound **3f** (144 mg) was obtained in 91% yield as colorless solid; mp = 127–129 °C;  $R_f = 0.5$  (3:2 hexane/EtOAc); [Silica, UV and  $\text{I}_2$ ];  $^1\text{H}$  NMR (600 MHz,  $\text{CDCl}_3$ ):  $\delta$  7.86 (d,  $J = 8.4$  Hz, 2H), 7.29–7.16 (m, 7H), 7.11 (d,  $J = 7.2$  Hz, 1H), 7.08 (d,  $J = 7.2$  Hz, 2H), 6.87 (dd,  $J = 8.4, 2.4$  Hz, 1H), 6.48 (s, 1H), 5.07 (s, 1H), 4.97 (s, 1H), 4.43 (s, 2H), 4.40 (s, 2H), 2.93 (s, 1H), 2.32 (s, 3H), 1.81 (s, 3H);  $^{13}\text{C}$  NMR (151 MHz,  $\text{CDCl}_3$ )  $\delta$  158.8, 149.9, 144.3, 140.7, 137.1, 135.9, 132.5, 131.7, 131.5, 129.6, 129.4, 128.5, 128.3, 127.9, 123.5, 123.4, 122.1, 121.7, 116.32, 116.25, 113.9, 113.8, 112.6, 85.9, 81.9, 77.4, 73.7, 71.6, 39.8, 21.5, 19.4; IR (Neat) $\nu_{\text{max}}$  2221, 1728, 1365, 1260, 1119, 1017, 729, 595  $\text{cm}^{-1}$ ; HRMS (ESI) for  $\text{C}_{31}\text{H}_{28}\text{NO}_5$  ( $\text{M}+\text{H}$ ) $^+$ : calcd 526.1688, found 526.1687.

**(E)-2-Cyclopropyl-1-(4-methyl-N-(3-phenylprop-2-yn-1-yl)phenylsulfonamido)vinyl propiolate (3g):**

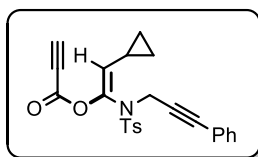

Following the general procedure GP-3, compound **3g** (122 mg) was obtained in 97% yield as colorless solid; mp = 118–120 °C;  $R_f = 0.53$  (3:2 hexane/EtOAc); [Silica, UV and  $\text{I}_2$ ];  $^1\text{H}$  NMR (600 MHz,  $\text{CDCl}_3$ ):  $\delta$  7.87 (d,  $J = 7.8$  Hz, 2H), 7.29–7.21 (m, 5H), 7.20–7.16 (m, 2H), 5.05 (d,  $J = 15.0$  Hz, 1H), 4.52 (s, 2H), 2.87 (s, 1H), 2.35 (s, 3H), 1.70–1.60 (m, 1H), 0.77–0.68 (m, 2H), 0.48–0.41 (m, 2H);  $^{13}\text{C}$  NMR (151 MHz,  $\text{CDCl}_3$ )  $\delta$  150.5, 144.0, 136.5, 136.0, 131.6, 130.8, 130.6, 129.5, 129.4, 128.3, 128.0, 122.4, 85.5, 82.8, 76.7, 73.9, 40.3, 21.5, 9.64, 9.61, 7.3; IR (Neat) $\nu_{\text{max}}$  2120, 1732, 1355, 1160, 1130, 690, 543  $\text{cm}^{-1}$ ; HRMS (ESI) for  $\text{C}_{24}\text{H}_{21}\text{NNaO}_4\text{S}$  ( $\text{M}+\text{Na}$ ) $^+$ : calcd 442.1089, found 442.1088.



**(E)-4-((tert-Butyldimethylsilyloxy)-1-(4-methyl-N-(3-phenylprop-2-yn-1-yl)phenylsulfonamido)but-1-en-1-yl propiolate (3h):**

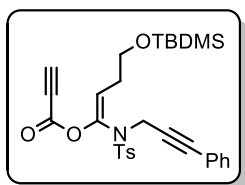

Following the general procedure GP-3, compound **3h** (145 mg) was obtained in 90% yield as colorless solid; mp = 126–128 °C;  $R_f$  = 0.55 (3:2 hexane/EtOAc); [Silica, UV and I<sub>2</sub>]; <sup>1</sup>H NMR (500 MHz, CDCl<sub>3</sub>): δ 7.86 (d,  $J$  = 8.5 Hz, 2H), 7.32–7.20 (m, 7H), 5.79 (t,  $J$  = 7.5 Hz, 1H), 4.47 (s, 2H), 3.69 (t,  $J$  = 6.5 Hz, 2H), 2.89 (s, 1H), 2.48 (q,  $J$  = 6.5 Hz, 2H), 2.37 (s, 3H), 0.89 (s, 9H), 0.05 (s, 6H); <sup>13</sup>C NMR (126MHz, CDCl<sub>3</sub>) δ 150.1, 144.1, 137.7, 136.2, 131.6, 129.5, 128.4, 128.3, 128.0, 123.3, 122.3, 85.5, 73.8, 61.7, 40.3, 31.0, 25.9, 21.5, 18.2, –5.5; IR (Neat) $\nu_{\max}$  2119, 1732, 1353, 1160, 1130, 1051, 757, 659 cm<sup>-1</sup>; HRMS (ESI) for C<sub>29</sub>H<sub>36</sub>NO<sub>5</sub>SSi (M+H)<sup>+</sup>: calcd 538.2083, found 538.1304.

**(E)-1-(4-Methyl-N-(3-phenylprop-2-yn-1-yl)phenylsulfonamido)oct-1-en-1-yl propiolate (3i):**

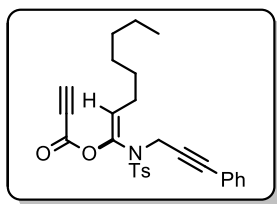

Following the general procedure GP-3, compound **3i** (135 mg) was obtained in 97% yield as colorless solid; mp = 121–123 °C;  $R_f$  = 0.52 (3:2 hexane/EtOAc); [Silica, UV and I<sub>2</sub>]; <sup>1</sup>H NMR (500 MHz, CDCl<sub>3</sub>): δ 7.86 (d,  $J$  = 8.0 Hz, 2H), 7.35–7.20 (m, 7H), 5.66 (t,  $J$  = 7.5 Hz, 1H), 4.45 (s, 2H), 2.90 (s, 1H), 2.38 (s, 3H), 2.23 (q,  $J$  = 7.5 Hz, 2H), 1.44–1.33 (m, 2H), 1.32–1.15 (m, 6H), 0.85 (t,  $J$  = 6.5 Hz, 3H); <sup>13</sup>C NMR (126MHz, CDCl<sub>3</sub>) δ 150.4, 144.1, 136.7, 136.2, 131.6, 129.4, 128.4, 128.2, 128.0, 126.6, 122.3, 85.4, 82.5, 77.3, 73.8, 40.2, 31.5, 29.0, 28.7, 27.2, 22.5, 21.5, 14.0; IR (Neat) $\nu_{\max}$  1733, 1356, 1162, 1141, 1089, 661 cm<sup>-1</sup>; HRMS (ESI) for C<sub>27</sub>H<sub>30</sub>NO<sub>4</sub>S (M+H)<sup>+</sup>: calcd 464.1896, found 464.1886.

**(E)-5-Chloro-1-(4-methyl-N-(3-phenylprop-2-yn-1-yl)phenylsulfonamido)pent-1-en-1-yl propiolate (3j):**

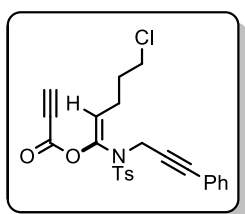

Following the general procedure GP-3, compound **3j** (130 mg) was obtained in 95% yield as colorless solid; mp = 124–126 °C;  $R_f$  = 0.5 (3:2 hexane/EtOAc); [Silica, UV and I<sub>2</sub>]; <sup>1</sup>H NMR (400 MHz, CDCl<sub>3</sub>): δ 7.86 (d,  $J$  = 8.0 Hz, 2H), 7.34–7.21 (m, 7H), 5.66 (t,  $J$  = 7.6 Hz, 1H), 4.46 (s, 2H), 3.53 (t,  $J$  = 6.4 Hz, 2H), 2.92 (s, 1H), 2.45 (q,  $J$  = 7.2 Hz, 2H), 2.39 (s, 3H), 1.99–1.85 (m, 2H);

$^{13}\text{C}$  NMR (101 MHz,  $\text{CDCl}_3$ )  $\delta$  150.1, 144.3, 137.5, 135.9, 131.6, 129.5, 128.5, 128.2, 128.0, 124.7, 122.1, 85.6, 82.2, 77.0, 73.6, 44.1, 40.0, 31.4, 24.6, 21.4; IR (Neat) $\nu_{\text{max}}$  2121, 1733, 1353, 1157, 1126, 1052, 657; HRMS (ESI) for  $\text{C}_{24}\text{H}_{23}\text{ClNO}_4\text{S}(\text{M}+\text{H})^+$ : calcd 456.1036, found 456.1094.

**(E)-1-(N-(3-(2-Methoxyphenyl)prop-2-yn-1-yl)-4-methylphenylsulfonamido)-2-phenylvinyl propiolate (3k):**

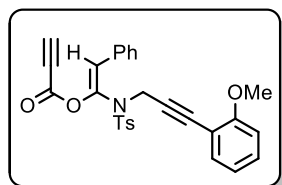

Following the general procedure GP-3, compound **3k** (137 mg) was obtained in 94% yield as colorless solid; mp = 128–130 °C;  $R_f$  = 0.48 (3:2 hexane/EtOAc); [Silica, UV and  $\text{I}_2$ ];  $^1\text{H}$  NMR (500 MHz,  $\text{CDCl}_3$ ):  $\delta$  7.85 (d,  $J$  = 8.5 Hz, 2H), 7.60 (t,  $J$  = 1.0 Hz, 2H), 7.35–7.27 (m, 3H), 7.25–7.17 (m, 3H), 6.94 (dd,  $J$  = 7.5, 2.0 Hz, 1H), 6.81–6.75 (m, 2H), 6.54 (s, 1H), 4.49 (s, 2H), 3.77 (s, 3H), 2.93 (s, 1H), 2.33 (s, 3H);  $^{13}\text{C}$  NMR (151 MHz,  $\text{CDCl}_3$ )  $\delta$  159.9, 149.7, 144.1, 137.1, 135.9, 133.7, 131.4, 129.8, 129.3, 128.8, 128.7, 128.50, 128.45, 123.3, 119.9, 111.3, 110.3, 85.6, 82.5, 77.2, 73.8, 55.5, 40.0, 21.5; IR (Neat) $\nu_{\text{max}}$  2927, 2120, 1733, 1491, 1352, 1292, 1160, 1019, 692, 660  $\text{cm}^{-1}$ ; HRMS (ESI) for  $\text{C}_{28}\text{H}_{23}\text{NNaO}_5\text{S}(\text{M}+\text{Na})^+$ : calcd 508.1195, found 508.1192.

**(E)-1-(4-Methyl-N-(3-(3-((2-methylallyl)oxy)phenyl)prop-2-yn-1-yl)phenylsulfonamido)-2-phenylvinyl propiolate (3l):**

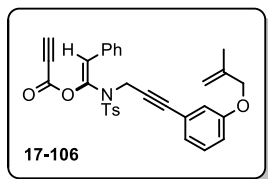

Following the general procedure GP-3, compound **3l** (147 mg) was obtained in 96% yield as colorless solid; mp = 128–130 °C;  $R_f$  = 0.4 (3:2 hexane/EtOAc); [Silica, UV and  $\text{I}_2$ ];  $^1\text{H}$  NMR (400 MHz,  $\text{CDCl}_3$ ):  $\delta$  7.91 (d,  $J$  = 7.6 Hz, 2H), 7.65 (d,  $J$  = 7.2 Hz, 2H), 7.48–7.25 (m, 5H), 7.14 (t,  $J$  = 8.0 Hz, 1H), 6.86 (d,  $J$  = 7.2 Hz, 1H), 6.80–6.69 (m, 2H), 6.55 (s, 1H), 5.10 (s, 1H), 5.02 (s, 1H), 4.47 (s, 2H), 4.37 (s, 2H), 2.99 (s, 1H), 2.38 (s, 3H), 1.85 (s, 3H);  $^{13}\text{C}$  NMR (151 MHz,  $\text{CDCl}_3$ )  $\delta$  158.2, 150.0, 144.5, 140.6, 137.1, 136.0, 131.4, 129.5, 129.1, 129.0, 128.7, 128.6, 124.2, 123.6, 123.1, 117.8, 115.5, 112.9, 86.0, 81.8, 73.8, 71.7, 39.9, 21.6, 19.5; IR (Neat) $\nu_{\text{max}}$  2226, 17321, 1698, 1358, 1163, 1108, 758  $\text{cm}^{-1}$ ; HRMS (ESI) for  $\text{C}_{31}\text{H}_{28}\text{NO}_5\text{S}(\text{M}+\text{H})^+$ : calcd 526.1688, found 526.1687.

**(E)-1-(4-Methyl-N-(pent-2-yn-1-yl)phenylsulfonamido)-2-phenylvinyl propiolate (3m):**

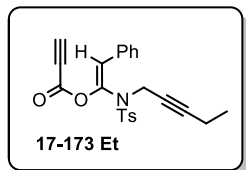

Following the general procedure GP-3, compound **3m** (120 mg) was obtained in 98% yield as colorless solid; mp= 118–120 °C;  $R_f$  = 0.51 (3:2 hexane/EtOAc); [Silica, UV and  $I_2$ ];  $^1\text{H NMR}$  (500 MHz,  $\text{CDCl}_3$ ):  $\delta$  7.84 (d,  $J$  = 8.0 Hz, 2H), 7.59 (d,  $J$  = 7.5 Hz, 2H), 7.38–7.24 (m, 5H), 6.50 (s, 1H), 4.19 (s, 2H), 3.04 (s, 1H), 2.42 (s, 3H), 1.92 (q,  $J$  = 7.5 Hz, 2H), 0.88 (t,  $J$  = 7.5 Hz, 3H);  $^{13}\text{C NMR}$  (121 MHz,  $\text{CDCl}_3$ )  $\delta$  149.8, 144.1, 136.9, 136.0, 131.4, 129.3, 128.8, 128.7, 128.5, 123.4, 88.1, 77.2, 73.8, 71.8, 39.3, 21.5, 13.1, 12.1; IR (Neat) $\nu_{\text{max}}$  2119, 1735, 1348, 1160, 1114, 1015, 658, 533  $\text{cm}^{-1}$ ; HRMS (ESI) for  $\text{C}_{23}\text{H}_{22}\text{NO}_4\text{S}$  ( $\text{M}+\text{H}$ ) $^+$ : calcd 408.1270, found 408.1267.

**(E)-1-(4-Methyl-N-(3-(thiophen-2-yl)prop-2-yn-1-yl)phenylsulfonamido)-2-phenylvinyl propiolate (3n):**

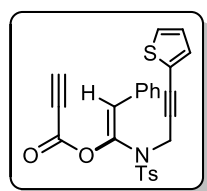

Following the general procedure GP-3, compound **3n** (133 mg) was obtained in 96% yield as colorless solid; mp = 132–134 °C;  $R_f$  = 0.4 (3:2 hexane/EtOAc); [Silica, UV and  $I_2$ ];  $^1\text{H NMR}$  (600 MHz,  $\text{CDCl}_3$ ):  $\delta$  7.87 (d,  $J$  = 10.2 Hz, 2H), 7.59 (d,  $J$  = 9.0 Hz, 2H), 7.34 (t,  $J$  = 7.2 Hz, 2H), 7.33–7.27 (m, 1H), 7.24 (d,  $J$  = 7.8 Hz, 2H), 7.18 (dd,  $J$  = 5.4, 1.2 Hz, 1H), 6.93 (d,  $J$  = 2.4 Hz, 1H), 6.89–6.86 (m, 1H), 6.50 (s, 1H), 4.44 (s, 2H), 2.96 (s, 1H), 2.36 (s, 3H);  $^{13}\text{C NMR}$  (151 MHz,  $\text{CDCl}_3$ )  $\delta$  149.9, 144.4, 137.0, 135.9, 132.5, 131.3, 129.5, 128.9, 128.8, 128.6, 128.5, 127.3, 126.6, 123.5, 122.0, 85.8, 79.3, 77.3, 73.7, 40.0, 21.6; IR (Neat) $\nu_{\text{max}}$  2119, 1726, 1345, 1119, 1162, 1018, 691, 661, 534  $\text{cm}^{-1}$ ; HRMS (ESI) for  $\text{C}_{25}\text{H}_{19}\text{NNaO}_4\text{S}_2$  ( $\text{M}+\text{Na}$ ) $^+$ : calcd 484.0653, found 484.0652.

**(E)-2-Phenyl-1-(N-(3-phenylprop-2-yn-1-yl)phenylsulfonamido)vinyl propiolate (3o):**

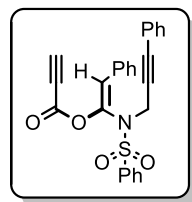

Following the general procedure GP-3, compound **3o** (131 mg) was obtained in 99% yield as colorless solid; mp= 120–122 °C;  $R_f$  = 0.42 (3:2 hexane/EtOAc); [Silica, UV and  $I_2$ ];  $^1\text{H NMR}$  (600 MHz,  $\text{CDCl}_3$ ):  $\delta$  8.00 (d,  $J$  = 7.2 Hz, 2H), 7.61 (d,  $J$  = 7.2 Hz, 2H), 7.53 (t,  $J$  = 7.2 Hz, 1H), 7.44 (t,  $J$  = 7.8 Hz, 2H), 7.34 (t,  $J$  = 7.2 Hz, 2H), 7.29 (t,  $J$  = 7.8 Hz, 1H), 7.25 (t,  $J$  = 7.8 Hz, 1H), 7.19 (t,  $J$  = 7.8 Hz, 2H), 7.11–7.06 (m, 2H), 6.52 (s, 1H), 4.46 (s, 2H), 2.90 (s, 1H);  $^{13}\text{C NMR}$  (151 MHz,  $\text{CDCl}_3$ )  $\delta$  149.9, 139.0, 136.8, 133.3, 131.61, 131.56, 131.3, 128.9, 128.7, 128.5, 128.0, 123.6, 122.0, 86.1, 81.7, 77.3,

73.7, 40.0; IR (Neat) $\nu_{\max}$  1724, 1351, 1264, 1100, 1052, 732,701  $\text{cm}^{-1}$ ; HRMS (ESI) for  $\text{C}_{26}\text{H}_{20}\text{NO}_4\text{S}$  ( $\text{M}+\text{H}$ ) $^+$ : calcd 442.1113, found 442.1110.

**(E)-2-Phenyl-1-(2,4,6-triisopropyl-N-(3-phenylprop-2-yn-1-yl)phenylsulfonamido)vinyl propiolate (3p):**

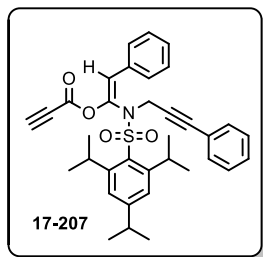

Following the general procedure GP-3, compound **3p** (159 mg) was obtained in 97% yield as colorless solid; mp = 116–118 °C;  $R_f$  = 0.33 (3:2 hexane/EtOAc); [Silica, UV and  $\text{I}_2$ ];  $^1\text{H}$  NMR (400 MHz,  $\text{CDCl}_3$ ):  $\delta$  7.70–7.59 (m, 2H), 7.35–7.22 (m, 5H), 7.21–7.15 (m, 3H), 7.13–7.03 (m, 2H), 6.58–6.50 (m, 1H), 4.70–4.60 (m, 2H), 4.19–3.95 (m, 2H), 2.95–2.81 (m, 2H), 1.45–1.20 (m, 18H);  $^{13}\text{C}$  NMR (101 MHz,  $\text{CDCl}_3$ )  $\delta$  153.5, 151.7, 150.5, 136.6, 133.3, 131.6, 131.5, 129.0, 128.8, 128.4, 128.3, 128.0, 124.2, 123.8, 122.4, 85.7, 82.7, 73.9, 39.0, 34.2, 30.5, 25.1, 23.5; IR (Neat) $\nu_{\max}$  2226, 1738, 1488, 1154, 1084, 1110, 750, 687  $\text{cm}^{-1}$ ; HRMS (ESI) for  $\text{C}_{35}\text{H}_{37}\text{NO}_4\text{S}$  ( $\text{M}+\text{Na}$ ) $^+$ : calcd 568.2522, found 568.2521.

**General procedure for the chemo-, regio-, and stereoselective hydropropioloxylation of ynamide **1** / **5** with arylpropionic acids **2b** / **2c** (GP-4):**

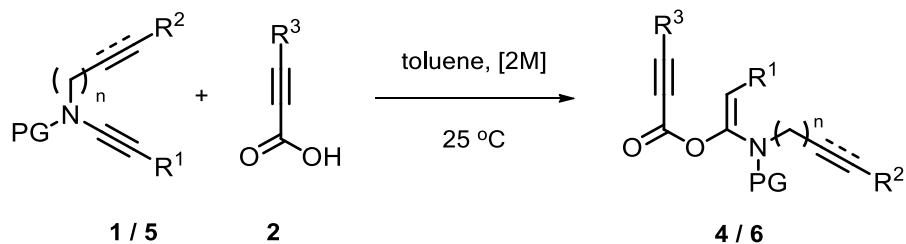

To the solution of ynamide (0.3 mmol) in 2M toluene was introduced arylpropionic acid **2** (0.36 mmol). The reaction mixture was stirred at RT. The progress of the reaction was periodically monitored by TLC. After complete consumption of ynamide, the reaction mixture was diluted with EtOAc and neutralized with saturated  $\text{NaHCO}_3$  solution. The organic layer was further extracted with EtOAc (10 mL) and dried under anhydrous  $\text{Na}_2\text{SO}_4$ . After evaporation of solvent under reduced pressure, the residue was purified

by flash chromatography on silica gel (Hexane/EtOAc) to afford the expected product **4** /6.

**(E)-1-(4-methyl-N-(3-phenylprop-2-yn-1-yl)phenylsulfonamido)-2-phenylvinyl 3-phenylpropiolate (4a):**

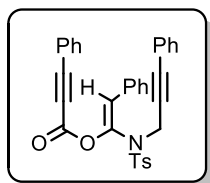

Following the general procedure GP-4, compound **4a** (157 mg) was obtained in 98% yield as colorless solid; mp = 131–133 °C;  $R_f$  = 0.43 (3:2 hexane/EtOAc); [Silica, UV and  $I_2$ ];  $^1H$  NMR (500 MHz,  $CDCl_3$ ):  $\delta$  7.94 (d,  $J$  = 8.5 Hz, 2H), 7.66 (d,  $J$  = 7.5 Hz, 2H), 7.52–7.29 (m, 8H), 7.19 (d,  $J$  = 7.5 Hz, 3H), 7.16–7.06 (m, 4H), 6.57 (s, 1H), 4.49 (s, 2H), 2.23 (s, 3H);  $^{13}C$  NMR (101 MHz,  $CDCl_3$ )  $\delta$  151.1, 144.1, 137.3, 136.2, 132.9, 131.6, 131.0, 129.3, 128.9, 128.71, 128.67, 128.6, 128.2, 127.9, 123.3, 122.2, 119.1, 89.0, 85.9, 82.1, 79.8, 40.0, 21.4; IR (Neat) $\nu_{max}$  1730, 1173, 1156, 1046, 1012, 682, 537 $cm^{-1}$ ; HRMS (ESI) for  $C_{33}H_{25}NNaO_4S$  ( $M+Na$ ) $^+$ : calcd 554.1403, found 554.1403.

**(E)-2-(2-iodophenyl)-1-(4-methyl-N-(3-phenylprop-2-yn-1-yl)phenylsulfonamido)vinyl 3-phenylpropiolate (4b):**

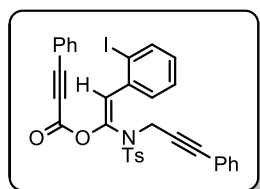

Following the general procedure GP-4, compound **4b** (183 mg) was obtained in 92% yield as colorless solid; mp = 123–125 °C;  $R_f$  = 0.49 (3:2 hexane/EtOAc); [Silica, UV and  $I_2$ ];  $^1H$  NMR (500 MHz,  $CDCl_3$ ):  $\delta$  7.93–7.83 (m, 4H), 7.55–7.49 (m, 3H), 7.47–7.34 (m, 4H), 7.25–7.17 (m, 6H), 7.02–6.94 (m, 1H), 6.68 (s, 1H), 4.39 (s, 2H), 2.26 (s, 3H);  $^{13}C$  NMR (101 MHz,  $CDCl_3$ )  $\delta$  150.8, 144.0, 139.2, 139.0, 135.9, 133.0, 131.7, 131.1, 129.7, 129.4, 128.3, 127.9, 125.8, 122.2, 119.0, 100.2, 89.3, 85.9, 82.1, 80.0, 40.2, 21.4; IR (Neat) $\nu_{max}$  1724, 1348, 1285, 1151, 1076, 1053, 761, 580  $cm^{-1}$ ; HRMS (ESI) for  $C_{33}H_{24}INNaO_4S$  ( $M+Na$ ) $^+$ : calcd 680.0368, found 680.0366.

**(E)-1-(4-methyl-N-(3-phenylprop-2-yn-1-yl)phenylsulfonamido)-2-(3-(trifluoromethyl)phenyl) vinyl 3-phenylpropiolate (4c):**

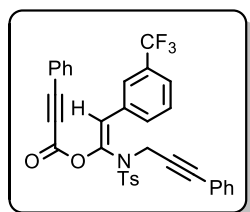

Following the general procedure GP-4, compound **4c** (169 mg) was obtained in 94% yield as colorless solid; mp = 130–132 °C;  $R_f$  = 0.41 (3:2 hexane/EtOAc); [Silica, UV and  $I_2$ ];  $^1H$  NMR (500 MHz,  $CDCl_3$ ):  $\delta$  7.93 (d,  $J$  = 8.4 Hz, 2H), 7.65 (d,  $J$  = 7.2 Hz, 2H), 7.50 (t,  $J$  = 7.2 Hz, 1H), 7.46–7.27 (m, 7H), 7.20 (d,  $J$  = 7.8 Hz, 2H), 7.06 (t,  $J$  = 7.2 Hz, 2H), 6.79 (t,  $J$  = 8.4 Hz, 2H), 6.55 (s, 1H),

4.46 (s, 2H), 2.25 (s, 3H);  $^{13}\text{C}$  NMR (101 MHz,  $\text{CDCl}_3$ )  $\delta$  150.9, 140.4, 138.5, 135.8, 133.0, 132.7, 131.7, 130.6, 131.3, 131.2, 131.0, 130.8, 136.5, 129.4, 129.1, 128.64, 128.62, 128.4, 128.0, 125.93, 125.90, 125.87, 125.84, 125.2, 125.1, 125.0, 122.8, 122.2, 122.0, 119.0, 89.4, 86.3, 81.6, 79.7, 39.8, 21.4;  $^{19}\text{F}$  NMR (471 MHz,  $\text{CDCl}_3$ )  $\delta$  -62.8 ppm; IR (Neat) $\nu_{\text{max}}$  1737, 1350, 1156, 1108, 1013, 756, 687  $\text{cm}^{-1}$ ; HRMS (ESI) for  $\text{C}_{34}\text{H}_{24}\text{F}_3\text{NNaO}_4\text{S}$  ( $\text{M}+\text{Na}$ ) $^+$ : calcd 622.1276, found 622.1309.

**(E)-2-(4-formylphenyl)-1-(4-methyl-N-(3-phenylprop-2-yn-1-yl)phenylsulfonamido)vinyl 3-phenylpropiolate (4d):**

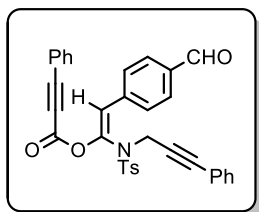

Following the general procedure GP-4, compound **4d** (166 mg) was obtained in 99% yield as colorless solid; mp = 138–140 °C;  $R_f$  = 0.46 (3:2 hexane/EtOAc); [Silica, UV and  $\text{I}_2$ ];  $^1\text{H}$  NMR (500 MHz,  $\text{CDCl}_3$ ):  $\delta$  9.97 (s, 1H), 7.89 (d,  $J$  = 8.0 Hz, 2H), 7.82 (q,  $J$  = 8.5 Hz, 4H), 7.49 (t,  $J$  = 7.5 Hz, 1H), 7.44 (d,  $J$  = 7.5 Hz, 2H), 7.38 (t,  $J$  = 8.0 Hz, 2H), 7.24–7.18 (m, 3H), 7.16–7.07 (m, 4H), 6.65 (s, 1H), 4.48 (s, 2H), 2.24 (s, 3H);  $^{13}\text{C}$  NMR (126 MHz,  $\text{CDCl}_3$ )  $\delta$  191.6, 150.7, 144.4, 139.2, 138.0, 135.9, 135.8, 133.0, 131.5, 131.2, 129.8, 129.44, 129.38, 128.62, 128.57, 128.4, 128.0, 122.2, 121.9, 118.8, 89.5, 86.3, 81.6, 79.6, 40.0, 21.4; IR (Neat) $\nu_{\text{max}}$  2126, 1748, 1351, 1157, 1114, 1046, 754, 684  $\text{cm}^{-1}$ ; HRMS (ESI) for  $\text{C}_{34}\text{H}_{25}\text{NNaO}_5\text{S}$  ( $\text{M}+\text{Na}$ ) $^+$ : calcd 582.1351, found 582.1350.

**(E)-2-(4-cyanophenyl)-1-(4-methyl-N-(3-phenylprop-2-yn-1-yl)phenylsulfonamido)vinyl 3-phenylpropiolate (4e):**

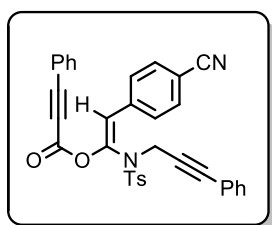

Following the general procedure GP-4, compound **4e** (159 mg) was obtained in 95% yield as colorless solid; mp = 133–135 °C;  $R_f$  = 0.38 (3:2 hexane/EtOAc); [Silica, UV and  $\text{I}_2$ ];  $^1\text{H}$  NMR (500 MHz,  $\text{CDCl}_3$ ):  $\delta$  7.87 (d,  $J$  = 8.0 Hz, 2H), 7.76 (d,  $J$  = 8.0 Hz, 2H), 7.60 (d,  $J$  = 8.5 Hz, 2H), 7.53–7.48 (m, 1H), 7.47–7.43 (m, 2H), 7.42–7.36 (m, 2H), 7.25–7.19 (m, 3H), 7.18–7.13 (m, 2H), 7.12–7.08 (m, 2H), 6.62 (s, 1H), 4.47 (s, 2H), 2.26 (s, 3H);  $^{13}\text{C}$  NMR (101 MHz,  $\text{CDCl}_3$ )  $\delta$  150.6, 144.6, 139.4, 136.7, 135.6, 133.0, 132.2, 131.5, 131.3, 129.5, 129.4, 128.7, 128.6, 128.0, 121.8, 118.8, 118.6, 111.8, 89.6, 86.4, 81.4, 79.5, 39.9, 21.4; IR (Neat) $\nu_{\text{max}}$  2121, 1724, 1343, 1160, 1114, 997, 752, 690  $\text{cm}^{-1}$ ; HRMS (ESI) for  $\text{C}_{34}\text{H}_{24}\text{N}_2\text{NaO}_4\text{S}$  ( $\text{M}+\text{Na}$ ) $^+$ : calcd 579.1354, found 579.1360.

**(E)-1-(N-(3-(4-chlorophenyl)prop-2-yn-1-yl)-4-methylphenylsulfonamido)-2-phenylvinyl 3-phenylpropiolate (4f):**

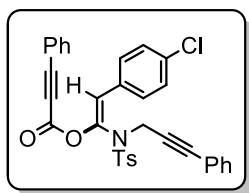

Following the general procedure GP-4, compound **4f** (165 mg) was obtained in 97% yield as colorless solid; mp = 128–130 °C;  $R_f$  = 0.4 (3:2 hexane/EtOAc); [Silica, UV and I<sub>2</sub>]; <sup>1</sup>H NMR (500 MHz, CDCl<sub>3</sub>): δ 7.93 (d,  $J$  = 8.5 Hz, 2H), 7.64 (d,  $J$  = 7.5 Hz, 2H), 7.53–7.47 (m, 1H), 7.44–7.34 (m, 6H), 7.33–7.29 (m, 1H), 7.21 (d,  $J$  = 8.0 Hz, 2H), 7.09–7.05 (m, 2H), 7.03–6.96 (m, 2H), 6.56 (s, 1H), 4.47 (s, 2H), 2.25 (s, 3H); <sup>13</sup>C NMR (126 MHz, CDCl<sub>3</sub>) δ 151.2, 144.1, 137.2, 136.3, 134.3, 132.9, 132.8, 131.5, 131.1, 129.3, 128.9, 128.8, 128.71, 128.65, 128.6, 128.2, 123.5, 120.7, 119.0, 89.1, 84.8, 83.3, 79.8, 39.9, 21.4; IR (Neat) $\nu_{\max}$  2923, 1738, 1366, 1324, 1216, 1155, 812, 760cm<sup>-1</sup>; HRMS (ESI) for C<sub>33</sub>H<sub>24</sub>ClNNaO<sub>4</sub>S (M+Na)<sup>+</sup>: calcd 588.1012, found 588.1012.

**(E)-1-(N-(3-(2-methoxynaphthalen-1-yl)prop-2-yn-1-yl)-4-methylphenylsulfonamido)-2-phenylvinyl 3-phenylpropiolate (4g):**

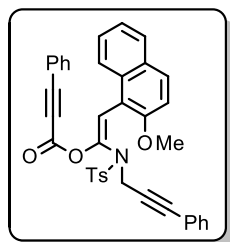

Following the general procedure GP-4, compound **4g** (172 mg) was obtained in 94% yield as pale yellow solid; mp = 140–142 °C;  $R_f$  = 0.4 (3:2 hexane/EtOAc); [Silica, UV and I<sub>2</sub>]; <sup>1</sup>H NMR (500 MHz, CDCl<sub>3</sub>): δ 8.04 (d,  $J$  = 8.5 Hz, 1H), 7.79 (dd,  $J$  = 21, 9.0 Hz, 2H), 7.71 (d,  $J$  = 8.5 Hz, 2H), 7.54–7.46 (m, 4H), 7.42–7.34 (m, 3H), 7.26 (d,  $J$  = 9.0 Hz, 1H), 7.23–7.19 (m, 1H), 7.17–7.11 (m, 4H), 6.97 (d,  $J$  = 8.4, 2H), 6.71 (s, 1H), 4.34 (s, 2H), 4.00 (s, 3H), 2.16 (s, 3H); <sup>13</sup>C NMR (101 MHz, CDCl<sub>3</sub>) δ 154.2, 151.6, 143.4, 140.3, 136.8, 133.0, 132.6, 131.6, 130.9, 130.1, 129.0, 128.6, 128.1, 128.03, 127.96, 127.85, 126.9, 124.6, 123.8, 122.6, 119.2, 114.9, 114.2, 112.9, 89.2, 84.8, 83.4, 80.1, 56.3, 39.6, 21.3; IR (Neat) $\nu_{\max}$  1745, 1350, 1273, 1159, 1100, 1017, 813, 688cm<sup>-1</sup>; HRMS (ESI) for C<sub>38</sub>H<sub>29</sub>NNaO<sub>5</sub>S (M+Na)<sup>+</sup>: calcd 634.1664, found 634.1654.

**(E)-1-(N-(3-(2-Methoxyphenyl)prop-2-yn-1-yl)-4-methylphenylsulfonamido)-2-phenylvinyl 3-phenylpropiolate (4h):**

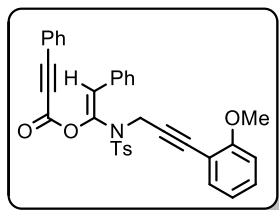

Following the general procedure GP-4, compound **4h** (161 mg) was obtained in 96% yield as colorless solid; mp = 124–126 °C;  $R_f$  = 0.42 (3:2 hexane/EtOAc); [Silica, UV and I<sub>2</sub>]; <sup>1</sup>H NMR (600 MHz, CDCl<sub>3</sub>): δ 7.91 (d,  $J$  = 9.0 Hz, 2H), 7.65 (d,  $J$  = 7.2 Hz, 2H), 7.49 (t,  $J$  = 7.8 Hz, 1H), 7.45

(d,  $J = 7.2$  Hz, 2H), 7.38 (t,  $J = 7.8$  Hz, 2H), 7.34 (t,  $J = 7.2$  Hz, 2H), 7.29 (t,  $J = 7.2$  Hz, 1H), 7.20–7.15 (m, 3H), 6.95 (dd,  $J = 7.8, 1.8$  Hz, 1H), 6.75 (d,  $J = 8.4$  Hz, 1H), 6.67 (t,  $J = 7.8$  Hz, 1H), 6.59 (s, 1H), 4.54 (s, 2H), 3.77 (s, 3H), 2.23 (s, 3H);  $^{13}\text{C}$  NMR (151 MHz,  $\text{CDCl}_3$ )  $\delta$  159.9, 151.0, 143.9, 137.4, 136.2, 133.9, 133.6, 132.98, 132.96, 131.7, 131.0, 129.9, 129.6, 129.4, 129.1, 128.9, 128.7, 128.5, 123.0, 122.97, 120.0, 119.8, 119.2, 111.4, 110.3, 88.8, 85.9, 82.5, 79.9, 55.5, 40.2, 21.4; IR (Neat) $\nu_{\text{max}}$  2235, 1738, 1488, 1349, 1154, 1110, 1017, 687, 660  $\text{cm}^{-1}$ ; HRMS (ESI) for  $\text{C}_{34}\text{H}_{28}\text{NO}_5\text{S}$  ( $\text{M}+\text{H}$ ) $^+$ : calcd 562.1688, found 562.1691.

**(E)-1-(4-Methyl-N-(3-(3-(trifluoromethyl)phenyl)prop-2-yn-1-yl)phenylsulfonamido)-2-phenylvinyl 3-phenylpropiolate (4i):**

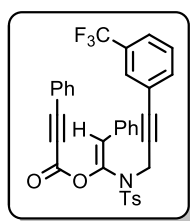

Following the general procedure GP-4, compound **4i** (173 mg) was obtained in 96% yield as colorless solid; mp = 120–122 °C;  $R_f = 0.46$  (3:2 hexane/EtOAc); [Silica, UV and  $\text{I}_2$ ];  $^1\text{H}$  NMR (600 MHz,  $\text{CDCl}_3$ ):  $\delta$  7.95 (d,  $J = 8.4$  Hz, 2H), 7.66 (d,  $J = 7.8$  Hz, 2H), 7.50 (t,  $J = 7.2$  Hz, 1H), 7.46 (d,  $J = 7.2$  Hz, 2H), 7.42–7.35 (m, 4H), 7.34–7.26 (m, 1H), 7.22 (d,  $J = 8.4$  Hz, 2H), 7.11–7.07 (m, 1H), 7.00–6.87 (d,  $J = 5.4$  Hz, 2H), 6.69 (d,  $J = 9.6$  Hz, 1H), 6.56 (s, 1H), 4.48 (s, 2H), 2.26 (s, 3H);  $^{13}\text{C}$  NMR (151 MHz,  $\text{CDCl}_3$ )  $\delta$  162.7, 161.1, 151.2, 144.2, 137.2, 136.2, 132.9, 131.5, 131.1, 129.7, 129.51, 129.46, 129.3, 129.2, 128.85, 128.81, 128.7, 128.64, 128.61, 128.2, 127.4, 124.0, 123.9, 123.4, 118.9, 118.4, 118.3, 115.6, 115.5, 89.2, 84.6, 83.2, 79.7, 39.9, 21.3;  $^{19}\text{F}$  NMR (471 MHz,  $\text{CDCl}_3$ )  $\delta$  -62.96 ppm; IR (Neat) $\nu_{\text{max}}$  172, 1698, 1351, 1156, 1109, 1085, 813, 741  $\text{cm}^{-1}$ ; HRMS (ESI) for  $\text{C}_{34}\text{H}_{24}\text{F}_3\text{NNaO}_4\text{S}$  ( $\text{M}+\text{Na}$ ) $^+$ : calcd 622.1276, found 622.1279.

**(E)-1-(4-methyl-N-(3-(p-tolyl)prop-2-yn-1-yl)phenylsulfonamido)-2-phenylvinyl 3-phenylpropiolate (4j):**

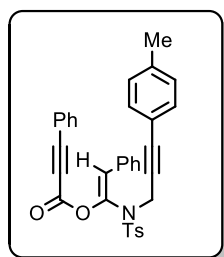

Following the general procedure GP-4, compound **4j** (160 mg) was obtained in 98% yield as colorless solid; mp = 124–126 °C;  $R_f = 0.42$  (3:2 hexane/EtOAc); [Silica, UV and  $\text{I}_2$ ];  $^1\text{H}$  NMR (500 MHz,  $\text{CDCl}_3$ ):  $\delta$  7.95 (d,  $J = 8.5$  Hz, 2H), 7.68 (d,  $J = 7.5$  Hz, 2H), 7.51 (d,  $J = 7.0$  Hz, 1H), 7.45–7.33 (m, 7H), 7.22 (d,  $J = 8.0$  Hz, 2H), 7.01 (d,  $J = 8.0$  Hz, 2H), 6.94 (d,  $J = 8.0$  Hz, 2H), 6.59 (s, 1H), 4.50 (s, 2H), 2.27 (s, 6H);  $^{13}\text{C}$  NMR (126 MHz,  $\text{CDCl}_3$ )  $\delta$  151.1, 144.0, 138.3,



137.4, 136.3, 132.9, 131.6, 131.5, 130.9, 129.3, 128.9, 128.7, 128.62, 128.58, 128.5, 123.3, 119.2, 119.1, 88.9, 86.1, 81.4, 79.9, 40.0, 21.4, 21.3; IR (Neat) $\nu_{\max}$  1735, 1602, 1508, 1348, 1254, 1162, 1051, 754  $\text{cm}^{-1}$ ; HRMS (ESI) for  $\text{C}_{34}\text{H}_{27}\text{NNaO}_5\text{S}$  ( $\text{M}+\text{Na}$ ) $^+$ : calcd 568.1558, found 568.1551.

**(E)-1-(N-(3-(4-methoxyphenyl)prop-2-yn-1-yl)-4-methylphenylsulfonamido)-2-phenylvinyl 3-phenylpropiolate (4k):**

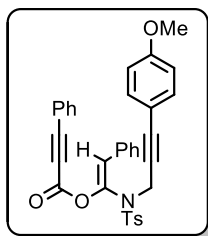

Following the general procedure GP-4, compound **4k** (167 mg) was obtained in 99% yield as colorless solid; mp = 136–138 °C;  $R_f$  = 0.42 (3:2 hexane/EtOAc); [Silica, UV and  $\text{I}_2$ ];  $^1\text{H}$  NMR (500 MHz,  $\text{CDCl}_3$ ):  $\delta$  7.92 (d,  $J$  = 8.0 Hz, 2H), 7.64 (d,  $J$  = 8.5 Hz, 2H), 7.49–7.45 (m, 1H), 7.43–7.28 (m, 7H), 7.19 (d,  $J$  = 8.0 Hz, 2H), 7.03 (d,  $J$  = 9.0 Hz, 2H), 6.62 (d,  $J$  = 9.0 Hz, 2H), 6.55 (s, 1H), 4.46 (s, 2H), 3.70 (s, 3H), 2.24 (s, 3H);  $^{13}\text{C}$  NMR (101 MHz,  $\text{CDCl}_3$ )  $\delta$  159.4, 151.1, 144.0, 137.3, 136.2, 133.0, 132.9, 131.6, 131.0, 129.3, 128.9, 128.7, 128.6, 123.3, 119.1, 114.3, 113.5, 88.9, 85.9, 80.6, 79.8, 55.1, 40.1, 21.4; IR (Neat) $\nu_{\max}$  2228, 1724, 1504, 1350, 1287, 1152, 1052, 832, 693  $\text{cm}^{-1}$ ; HRMS (ESI) for  $\text{C}_{34}\text{H}_{28}\text{NO}_5\text{S}$  ( $\text{M}+\text{H}$ ) $^+$ : calcd 562.1688, found 562.1678.

**(E)-1-(N-(3-(4-fluorophenyl)prop-2-yn-1-yl)-4-methylphenylsulfonamido)-2-phenylvinyl 3-phenylpropiolate (4l):**

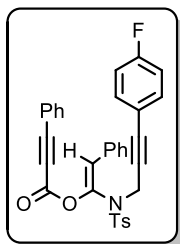

Following the general procedure GP-4, compound **4l** (106 mg) was obtained in 95% yield as colorless solid; mp = 127–129 °C;  $R_f$  = 0.43 (3:2 hexane/EtOAc); [Silica, UV and  $\text{I}_2$ ];  $^1\text{H}$  NMR (600 MHz,  $\text{CDCl}_3$ ):  $\delta$  7.93 (d,  $J$  = 8.4 Hz, 2H), 7.65 (d,  $J$  = 7.2 Hz, 2H), 7.50 (t,  $J$  = 6.6 Hz, 1H), 7.47–7.27 (m, 7H), 7.20 (d,  $J$  = 7.8 Hz, 2H), 7.06 (bt,  $J$  = 7.2 Hz, 2H), 6.79 (t,  $J$  = 8.4 Hz, 2H), 6.55 (s, 1H), 4.46 (s, 2H), 2.25 (s, 3H);  $^{13}\text{C}$  NMR (151 MHz,  $\text{CDCl}_3$ )  $\delta$  162.3 (d,  $J$  = 250 Hz, 1C), 151.2, 144.1, 137.2, 136.2, 133.5 (d,  $J$  = 8.6 Hz, 1C), 132.9, 131.5, 131.1, 129.3, 128.9, 128.8, 128.71, 128.66, 128.6, 123.5, 115.2 (d,  $J$  = 23.1 Hz, 1C), 89.1, 84.9, 81.9, 79.8, 40.0, 21.4;  $^{19}\text{F}$  NMR (376 MHz,  $\text{CDCl}_3$ )  $\delta$  -110.18; IR (Neat) $\nu_{\max}$  2128, 1732, 1353, 1160, 1116, 1087, 1018, 752, 660  $\text{cm}^{-1}$ ; HRMS (ESI) for  $\text{C}_{33}\text{H}_{24}\text{FNNaO}_4\text{S}$  ( $\text{M}+\text{Na}$ ) $^+$ : calcd 572.1308, found 572.1302.

**(E)-1-(N-(3-(4-bromophenyl)prop-2-yn-1-yl)-4-methylphenylsulfonamido)-2-phenylvinyl 3-phenylpropiolate (4m):**

Following the general procedure GP-4, compound **4m** (181 mg) was obtained in 99% yield as

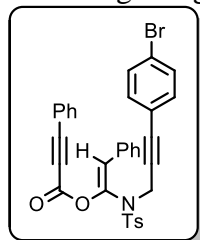

colorless solid; mp = 133–135 °C;  $R_f$  = 0.43 (3:2 hexane/EtOAc); [Silica, UV and I<sub>2</sub>]; <sup>1</sup>H NMR (500 MHz, CDCl<sub>3</sub>): δ 7.92 (d,  $J$  = 8.0 Hz, 2H), 7.64 (d,  $J$  = 7.5 Hz, 2H), 7.53–7.48 (m, 1H), 7.43–7.39 (m, 4H), 7.38–7.34 (m, 2H), 7.33–7.28 (m, 1H), 7.25–7.18 (m, 4H), 6.96–6.90 (m, 2H), 6.55 (s, 1H), 4.46 (s, 2H), 2.25 (s, 3H); <sup>13</sup>C NMR (101 MHz, CDCl<sub>3</sub>) δ 151.2, 144.1, 137.1, 136.2, 133.0, 132.9, 131.5, 131.2, 129.3, 128.9, 128.8, 128.72, 128.67, 123.6, 122.6, 121.1, 119.0, 89.1, 84.8, 83.4, 79.8, 39.9, 21.4; IR (Neat) $\nu_{\max}$  1724, 1406, 1154, 1088, 820, 661, 549 cm<sup>-1</sup>; HRMS (ESI) for C<sub>33</sub>H<sub>24</sub>BrNNaO<sub>4</sub>S (M+Na)<sup>+</sup>: calcd 632.0507, found 632.0508.

**(E)-1-(4-methyl-N-(3-phenylprop-2-yn-1-yl)phenylsulfonamido)-2-(4-(trifluoromethyl)phenyl)vinyl 3-phenylpropiolate (4n):**

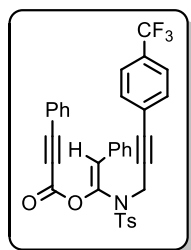

Following the general procedure GP-4, compound **4n** (171 mg) was obtained in 94% yield as colorless solid; mp = 128–130 °C;  $R_f$  = 0.39 (3:2 hexane/EtOAc); [Silica, UV and I<sub>2</sub>]; <sup>1</sup>H NMR (500 MHz, CDCl<sub>3</sub>): δ 7.94 (d,  $J$  = 8.0 Hz, 2H), 7.65 (d,  $J$  = 7.0 Hz, 2H), 7.49 (bt,  $J$  = 7.0 Hz, 1H), 7.44–7.29 (m, 9H), 7.22 (d,  $J$  = 7.5 Hz, 2H), 7.17 (d,  $J$  = 8.0 Hz, 2H), 6.57 (s, 1H), 4.50 (s, 2H), 2.25 (s, 3H); <sup>13</sup>C NMR (126 MHz, CDCl<sub>3</sub>) δ 151.2, 144.2, 137.2, 136.3, 132.9, 131.8, 131.5, 130.0 (q,  $J$  = 32 Hz, 1C), 129.4, 128.9, 128.8, 128.72, 128.66, 127.0, 124.7 (q,  $J$  = 3.8 Hz, 1C), 124.3 (q,  $J$  = 212 Hz, 1C), 123.6, 118.9, 89.2, 84.9, 84.5, 79.8, 39.9, 21.3; <sup>19</sup>F NMR (471 MHz, CDCl<sub>3</sub>) δ -62.94; IR (Neat) $\nu_{\max}$  2228, 1724, 1504, 1350, 1287, 1102, 1052, 760, 542 cm<sup>-1</sup>; HRMS (ESI) for C<sub>34</sub>H<sub>24</sub>F<sub>3</sub>NNaO<sub>4</sub>S (M+Na)<sup>+</sup>: calcd 622.1276, found 622.1270.

**(E)-1-(4-methyl-N-(3-(thiophen-2-yl)prop-2-yn-1-yl)phenylsulfonamido)-2-phenylvinyl 3-phenylpropiolate (4o):**

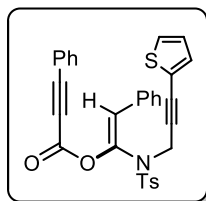

Following the general procedure GP-4, compound **4o** (156 mg) was obtained in 97% yield as colorless solid; mp = 139–141 °C;  $R_f$  = 0.37 (3:2 hexane/EtOAc); [Silica, UV and I<sub>2</sub>]; <sup>1</sup>H NMR (500 MHz, CDCl<sub>3</sub>): δ 7.92 (d,  $J$  = 8.0 Hz, 2H), 7.64 (d,  $J$  = 7.0 Hz, 2H), 7.52–7.43 (m, 3H), 7.41–7.28 (m, 5H),

7.21 (d,  $J = 8.0$  Hz, 2H), 7.12 (bd,  $J = 5.0$  Hz, 1H), 6.94 (bd,  $J = 2.5$  Hz, 1H), 6.84–6.78 (m, 1H), 6.55 (s, 1H), 4.49 (s, 2H), 2.25 (s, 3H);  $^{13}\text{C}$  NMR (126 MHz,  $\text{CDCl}_3$ )  $\delta$  151.1, 144.2, 137.4, 136.2, 133.0, 132.5, 131.5, 131.0, 129.4, 128.9, 128.7, 128.6, 127.2, 126.6, 123.2, 122.1, 119.2, 89.1, 86.1, 79.8, 79.3, 40.2, 21.4; IR (Neat) $\nu_{\text{max}}$  2209, 1721, 1340, 1150, 1081, 790, 754, 730  $\text{cm}^{-1}$ ; HRMS (ESI) for  $\text{C}_{31}\text{H}_{23}\text{NNaO}_4\text{S}_2$  ( $\text{M}+\text{Na}$ ) $^+$ : calcd 560.0966, found 560.0966.

**(E)-2-phenyl-1-(N-(3-phenylprop-2-yn-1-yl)phenylsulfonamido)vinyl 3-phenylpropionate (4p):**

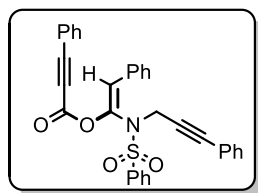

Following the general procedure GP-4, compound **4p** (154 mg) was obtained in 99% yield as colorless solid; mp = 123–125 °C;  $R_f$  = 0.41 (3:2 hexane/EtOAc); [Silica, UV and  $\text{I}_2$ ];  $^1\text{H}$  NMR (500 MHz,  $\text{CDCl}_3$ ):  $\delta$  7.98 (d,  $J=7.0$  Hz, 2H), 7.57 (d,  $J = 7.0$  Hz, 2H), 7.43–7.20 (m, 12H), 7.06–7.00 (m, 4H), 6.49 (s, 1H), 4.42 (s, 2H);  $^{13}\text{C}$  NMR (126 MHz,  $\text{CDCl}_3$ )  $\delta$  151.1, 139.3, 137.2, 133.1, 133.0, 131.6, 131.5, 131.0, 128.9, 128.8, 128.7, 128.64, 128.60, 128.58, 128.3, 127.9, 123.3, 122.1, 119.1, 89.1, 86.0, 82.0, 79.7, 40.1; IR (Neat) $\nu_{\text{max}}$  2205, 1713, 1352, 1162, 1052, 890, 751, 667  $\text{cm}^{-1}$ ; HRMS (ESI) for  $\text{C}_{32}\text{H}_{23}\text{NNaO}_4\text{S}$  ( $\text{M}+\text{Na}$ ) $^+$ : calcd 540.1245, found 540.1240.

**(E)-2-Phenyl-1-(N-(3-(p-tolyl)prop-2-yn-1-yl)phenylsulfonamido)vinyl 3-phenylpropionate (4q):**

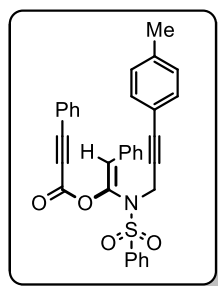

Following the general procedure GP-4, compound **4q** (152 mg) was obtained in 95% yield as colorless solid; mp = 126–128 °C;  $R_f$  = 0.42 (3:2 hexane/EtOAc); [Silica, UV and  $\text{I}_2$ ];  $^1\text{H}$  NMR (500 MHz,  $\text{CDCl}_3$ ):  $\delta$  8.06 (d, 7.5 Hz, 2H), 7.65 (d,  $J = 7.5$  Hz, 2H), 7.52–7.46 (m, 2H), 7.45–7.40 (m, 4H), 7.40–7.34 (m, 4H), 7.33–7.28 (m, 1H), 7.00 (d,  $J = 8.0$  Hz, 2H), 6.92 (d,  $J = 8.0$  Hz, 2H), 6.57 (s, 1H), 4.50 (s, 2H), 2.25 (s, 3H);  $^{13}\text{C}$  NMR (101 MHz,  $\text{CDCl}_3$ )  $\delta$  151.1, 139.3, 138.4, 137.2, 133.1, 133.0, 131.5, 131.0, 128.9, 128.8, 128.7, 128.6, 123.4, 119.09, 119.05, 89.0, 86.2, 81.2, 79.8, 40.2, 21.4; IR (Neat) $\nu_{\text{max}}$  2121, 1724, 1344, 1160, 1088, 887, 752, 690  $\text{cm}^{-1}$ ; HRMS (ESI) for  $\text{C}_{33}\text{H}_{25}\text{NNaO}_4\text{S}$  ( $\text{M}+\text{Na}$ ) $^+$ : calcd 554.1402, found 554.1404.

**(E)-2-phenyl-1-(N-(3-phenylprop-2-yn-1-yl)methylsulfonamido)vinyl 3-phenylpropiolate (4r):**

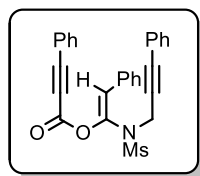

Following the general procedure GP-4, compound **4r** (135 mg) was obtained in 99% yield as colorless solid; mp = 127–129 °C;  $R_f$  = 0.42 (3:2 hexane/EtOAc); [Silica, UV and  $I_2$ ];  $^1\text{H NMR}$  (500 MHz,  $\text{CDCl}_3$ ):  $\delta$  7.61 (d,  $J$  = 7.5 Hz, 2H), 7.46 (bt,  $J$  = 7.5 Hz, 3H), 7.41 (d,  $J$  = 7.5 Hz, 2H), 7.39–7.28 (m, 5H), 7.27–7.23 (m, 1H), 7.19 (t,  $J$  = 7.5 Hz, 2H), 6.53 (s, 1H), 4.51 (s, 2H), 3.28 (s, 3H);  $^{13}\text{C NMR}$  (126 MHz,  $\text{CDCl}_3$ )  $\delta$  151.4, 137.4, 133.1, 131.7, 131.4, 131.2, 128.9, 128.8, 128.7, 128.6, 128.2, 122.7, 121.8, 118.8, 89.8, 86.5, 82.4, 79.7, 42.0, 40.1; IR (Neat) $\nu_{\text{max}}$  1721, 1340, 1282, 1149, 1112, 1282, 1149, 1057, 961, 753  $\text{cm}^{-1}$ ; HRMS (ESI) for  $\text{C}_{27}\text{H}_{21}\text{NNaO}_4\text{S}$  ( $\text{M}+\text{Na}$ ) $^+$ : calcd 478.1089, found 478.1113.

**(E)-1-(4-Chloro-N-(3-phenylprop-2-yn-1-yl)phenylsulfonamido)-2-phenylvinyl 3-phenylpropiolate (4s):**

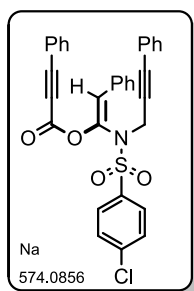

Following the general procedure GP-4, compound **4s** (157 mg) was obtained in 95% yield as colorless solid; mp = 132–134 °C;  $R_f$  = 0.39 (3:2 hexane/EtOAc); [Silica, UV and  $I_2$ ];  $^1\text{H NMR}$  (500 MHz,  $\text{CDCl}_3$ ):  $\delta$  7.99 (d,  $J$  = 8.5 Hz, 2H), 7.65–7.60 (m, 2H), 7.52–7.47 (m, 1H), 7.46–7.42 (m, 2H), 7.41–7.37 (m, 2H), 7.38–7.31 (m, 5H), 7.23–7.18 (m, 1H), 7.16–7.09 (m, 4H), 6.57 (s, 1H), 4.52 (s, 2H);  $^{13}\text{C NMR}$  (126 MHz,  $\text{CDCl}_3$ )  $\delta$  151.0, 139.8, 137.8, 137.0, 133.0, 131.6, 131.4, 131.1, 130.2, 128.90, 128.85, 128.71, 128.66, 128.5, 128.1, 123.6, 121.9, 118.9, 89.4, 86.4, 81.8, 79.7, 40.3; IR (Neat) $\nu_{\text{max}}$  2225, 1731, 1358, 1164, 1107, 1050, 757  $\text{cm}^{-1}$ ; HRMS (ESI) for  $\text{C}_{32}\text{H}_{22}\text{ClNNaO}_4\text{S}$  ( $\text{M}+\text{Na}$ ) $^+$ : calcd 574.0856, found 574.0857.

**(E)-1-(4-methyl-N-(3-phenylprop-2-yn-1-yl)phenylsulfonamido)-2-phenylvinyl 3-(thiophen-2-yl)propiolate (4t):**

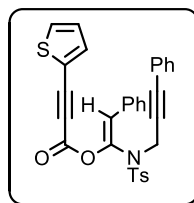

Following the general procedure GP-4, compound **4t** (150 mg) was obtained in 91% yield as colorless solid; mp = 138–140 °C;  $R_f$  = 0.38 (3:2 hexane/EtOAc); [Silica, UV and  $I_2$ ];  $^1\text{H NMR}$  (500 MHz,  $\text{CDCl}_3$ ):  $\delta$  7.93 (d,  $J$  = 5.0 Hz, 2H), 7.65 (bs, 2H), 7.53 (s, 1H), 7.47–6.98 (m, 12H), 6.56 (s, 1H), 4.48 (s, 2H), 2.27 (s, 3H);  $^{13}\text{C NMR}$  (126 MHz,  $\text{CDCl}_3$ )  $\delta$  151.0, 144.1, 137.3, 137.0, 136.2, 131.8, 131.5, 129.3,

128.9, 128.63, 128.59, 128.2, 127.8, 127.7, 123.2, 122.1, 118.8, 86.0, 84.2, 83.1, 82.0, 40.0, 21.4; IR (Neat) $\nu_{\max}$  1678, 1414, 1299, 1260, 849, 747, 547  $\text{cm}^{-1}$ ; HRMS (ESI) for  $\text{C}_{31}\text{H}_{23}\text{NNaO}_4\text{S}_2$  ( $\text{M}+\text{Na}$ ) $^+$ : calcd 560.0966, found 560.0966.

**(E)-1-(N-Allyl-4-methylphenylsulfonamido)-2-phenylvinyl propiolate (6a):**

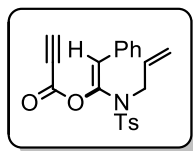

Following the general procedure GP-3, compound **6a** (101 mg) was obtained in 89% yield as colorless solid; mp = 121–123 °C;  $R_f$  = 0.39 (3:2 hexane/EtOAc); [Silica, UV and  $\text{I}_2$ ];  $^1\text{H}$  NMR (600 MHz,  $\text{CDCl}_3$ ):  $\delta$  7.80 (d,  $J$  = 10.2 Hz, 2H), 7.53 (d,  $J$  = 9.0 Hz, 2H), 7.30 (bs, 5H), 6.47 (s, 1H), 5.59 (s, 1H), 5.08–4.90 (m, 2H), 3.90 (s, 2H), 3.04 (s, 1H), 2.41 (s, 3H);  $^{13}\text{C}$  NMR (151 MHz,  $\text{CDCl}_3$ )  $\delta$  149.9, 144.2, 137.0, 136.1, 131.5, 131.3, 129.6, 128.9, 128.7, 128.5, 128.2, 122.8, 120.0, 77.3, 73.8, 52.2, 21.6; IR (Neat) $\nu_{\max}$  2118, 1729, 1347, 1189, 1157, 1015, 935, 758, 687  $\text{cm}^{-1}$ ; HRMS (ESI) for  $\text{C}_{21}\text{H}_{20}\text{NO}_4\text{S}$  ( $\text{M}+\text{H}$ ) $^+$ : calcd 382.1113, found 382.1110.

**(E)-1-(N-Allyl-4-methylphenylsulfonamido)-2-phenylvinyl 3-phenylpropiolate (6b):**

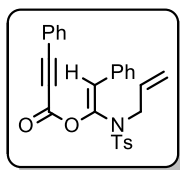

Following the general procedure GP-4, compound **6b** (125 mg) was obtained in 91% yield as pale yellow solid; mp = 141–143 °C;  $R_f$  = 0.40 (3:2 hexane/EtOAc); [Silica, UV and  $\text{I}_2$ ];  $^1\text{H}$  NMR (600 MHz,  $\text{CDCl}_3$ ):  $\delta$  7.85 (d,  $J$  = 6.6 Hz, 2H), 7.62–7.56 (m, 4H), 7.54–7.50 (m, 1H), 7.45–7.41 (m, 2H), 7.38–7.34 (m, 2H), 7.32–7.26 (m, 3H), 6.52 (s, 1H), 5.70–5.60 (m, 1H), 5.10 (dd,  $J$  = 16.8, 0.6 Hz, 1H), 5.03 (d,  $J$  = 9.6 Hz, 1H), 3.95 (d,  $J$  = 7.2 Hz, 2H), 2.33 (s, 3H);  $^{13}\text{C}$  NMR (151 MHz,  $\text{CDCl}_3$ )  $\delta$  151.2, 144.0, 137.3, 136.3, 133.1, 131.7, 131.5, 131.2, 129.63, 129.56, 129.47, 129.40, 128.9, 128.8, 128.7, 128.5, 128.2, 122.3, 119.1, 89.0, 79.7, 52.4, 21.5; IR (Neat) $\nu_{\max}$  1704, 1337, 1159, 1121, 1055, 811, 752, 589  $\text{cm}^{-1}$ ; HRMS (ESI) for  $\text{C}_{27}\text{H}_{23}\text{NNaO}_4\text{S}$  ( $\text{M}+\text{Na}$ ) $^+$ : calcd 480.1245, found 480.1246.

**(E)-1-(4-methyl-N-(3-methylbut-2-en-1-yl)phenylsulfonamido)-2-phenylvinyl 3-phenylpropiolate (6c):**

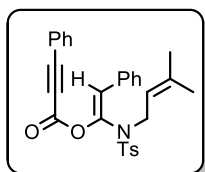

Following the general procedure GP-4, compound **6c** (127 mg) was obtained in 87% yield as colorless solid; mp = 140–142 °C;  $R_f$  = 0.43 (3:2 hexane/EtOAc); [Silica, UV and  $\text{I}_2$ ];  $^1\text{H}$  NMR (500 MHz,  $\text{CDCl}_3$ ):  $\delta$  7.84 (d,  $J$  = 8.5 Hz, 2H), 7.62–7.54 (m, 4H), 7.53–7.48 (m, 1H), 7.45–7.40 (m, 2H),

7.37–7.32 (m, 2H), 7.31–7.24 (m, 3H), 6.51 (s, 1H), 5.10–4.90 (m, 1H), 3.96 (d,  $J = 7.5$  Hz, 2H), 2.32 (s, 3H), 1.50 (s, 3H), 1.49 (s, 3H);  $^{13}\text{C}$  NMR (101 MHz,  $\text{CDCl}_3$ )  $\delta$  151.2, 143.8, 138.4, 137.6, 136.5, 133.1, 132.1, 131.1, 129.4, 128.9, 128.7, 128.4, 128.2, 122.5, 119.2, 117.5, 88.9, 79.8, 47.2, 25.6, 21.5, 17.7; IR (Neat) $\nu_{\text{max}}$  1753, 1490, 1397, 1221, 1198, 1030, 756, 691  $\text{cm}^{-1}$ ; HRMS (ESI) for  $\text{C}_{29}\text{H}_{28}\text{NO}_4\text{S}$  ( $\text{M}+\text{H}$ ) $^+$ : calcd 486.1739, found 486.1738.

**(E)-1-(4-methyl-N-(4-phenylbut-3-yn-1-yl)phenylsulfonamido)-2-phenylvinyl 3-phenylpropiolate (6d):**

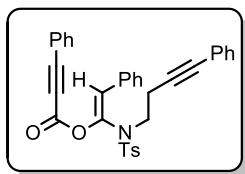

Following the general procedure GP-4, compound **6d** (153 mg) was obtained in 93% yield as colorless solid; mp = 136–138 °C;  $R_f = 0.49$  (3:2 hexane/EtOAc); [Silica, UV and  $\text{I}_2$ ];  $^1\text{H}$  NMR (500 MHz,  $\text{CDCl}_3$ ):  $\delta$  7.93 (d,  $J = 7.0$  Hz, 2H), 7.68 (bd,  $J = 3.0$  Hz, 2H), 7.59 (d,  $J = 7.5$  Hz, 2H), 7.54 (t,  $J = 7.5$  Hz, 1H), 7.45 (t,  $J = 7.5$  Hz, 2H), 7.40–7.22 (m, 10H), 6.62 (s, 1H), 3.59 (s, 2H), 2.65 (s, 2H), 2.32 (s, 3H);  $^{13}\text{C}$  NMR (126 MHz,  $\text{CDCl}_3$ )  $\delta$  151.4, 144.2, 136.6, 136.0, 133.1, 131.6, 131.5, 131.2, 129.6, 129.0, 128.8, 128.7, 128.6, 128.2, 128.1, 127.8, 123.6, 123.2, 119.0, 89.3, 85.9, 82.3, 79.6, 48.0, 21.4, 19.3; IR (Neat) $\nu_{\text{max}}$  1721, 1358, 1144, 1103, 1012, 755, 684  $\text{cm}^{-1}$ ; HRMS (ESI) for  $\text{C}_{34}\text{H}_{28}\text{NO}_4\text{S}$  ( $\text{M}+\text{H}$ ) $^+$ : calcd 546.1739, found 546.1739.

**(E)-1-(4-Methyl-N-(4-(pyrazin-2-yl)but-3-yn-1-yl)phenylsulfonamido)-2-phenylvinyl 3-phenylpropiolate (6e):**

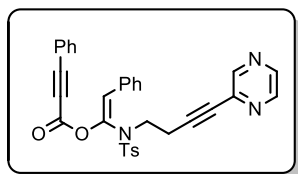

Following the general procedure GP-4, compound **6e** (153 mg) was obtained in 93% yield as colorless solid; mp = 149–151 °C;  $R_f = 0.32$  (3:2 hexane/EtOAc); [Silica, UV and  $\text{I}_2$ ];  $^1\text{H}$  NMR (400 MHz,  $\text{CDCl}_3$ ):  $\delta$  8.54–8.39 (m, 3H), 7.88 (d,  $J = 8.0$  Hz, 2H), 7.68–7.27 (m, 12H), 6.58 (s, 1H), 3.57 (t,  $J = 6.8$  Hz, 2H), 2.67 (t,  $J = 7.2$  Hz, 2H), 2.30 (s, 3H);  $^{13}\text{C}$  NMR (101 MHz,  $\text{CDCl}_3$ )  $\delta$  151.4, 147.6, 144.3, 144.1, 142.7, 140.0, 136.5, 135.7, 133.1, 131.28, 131.25, 129.7, 129.0, 128.9, 128.7, 128.6, 128.2, 123.8, 118.9, 90.9, 89.4, 79.5, 79.1, 47.5, 21.5, 19.4; IR (Neat) $\nu_{\text{max}}$  2220, 1731, 1353, 1142, 1086, 1013, 687, 544  $\text{cm}^{-1}$ ; HRMS (ESI) for  $\text{C}_{32}\text{H}_{26}\text{N}_3\text{O}_4\text{S}$  ( $\text{M}+\text{H}$ ) $^+$ : calcd 548.1644, found 548.1648.

**(E)-1-(4-methyl-N-(4-phenylbut-3-yn-1-yl)phenylsulfonamido)-2-phenylvinyl 3-(thiophen-2-yl)propiolate(6f):**

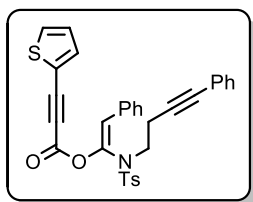

Following the general procedure GP-4, compound **6f** (141 mg) was obtained in 85% yield as colorless solid; mp = 138–140 °C;  $R_f$  = 0.38 (3:2 hexane/EtOAc); [Silica, UV and I<sub>2</sub>]; <sup>1</sup>H NMR (500 MHz, CDCl<sub>3</sub>): δ 7.92 (d,  $J$  = 8.5 Hz, 2H), 7.69 (d,  $J$  = 7.5 Hz, 2H), 7.55 (dd,  $J$  = 16.0, 5.0 Hz, 2H), 7.40–7.25 (m, 10H), 7.12 (t,  $J$  = 4.5 Hz, 1H), 6.62 (s, 1H), 3.59 (t,  $J$  = 7.5 Hz, 2H), 2.64 (t,  $J$  = 7.5 Hz, 2H), 2.33 (s, 3H); <sup>13</sup>C NMR (101 MHz, CDCl<sub>3</sub>) δ 151.2, 144.2, 137.2, 136.4, 135.8, 132.1, 131.5, 131.3, 129.6, 128.9, 128.7, 128.5, 128.1, 128.0, 127.8, 123.6, 123.1, 118.6, 85.8, 83.9, 83.4, 82.2, 47.9, 21.4, 19.2; IR (Neat) $\nu_{\max}$  1739, 1491, 1324, 1154, 1089, 1047, 814, 717, 663 cm<sup>-1</sup>; HRMS (ESI) for C<sub>32</sub>H<sub>25</sub>NNaO<sub>4</sub>S<sub>2</sub> (M+Na)<sup>+</sup>: calcd 574.1123, found 574.1113.

**(E)-1-(N,4-Dimethylphenylsulfonamido)-2-phenylvinyl 3-phenylpropiolate (6g):**

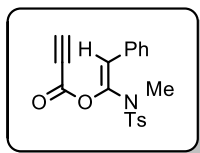

Following the general procedure GP-3, compound **6g** (109 mg) was obtained in 96% yield as colorless solid; mp = 120–122 °C;  $R_f$  = 0.4 (3:2 hexane/EtOAc); [Silica, UV and I<sub>2</sub>]; <sup>1</sup>H NMR (600 MHz, CDCl<sub>3</sub>): δ 7.79 (d,  $J$  = 8.4 Hz, 2H), 7.52 (d,  $J$  = 7.8 Hz, 2H), 7.36 (t,  $J$  = 7.8 Hz, 2H), 7.33–7.28 (m, 3H), 6.31 (s, 1H), 3.03 (s, 1H), 2.99 (s, 3H), 2.43 (s, 3H); <sup>13</sup>C NMR (151 MHz, CDCl<sub>3</sub>) δ 150.5, 144.2, 139.0, 135.4, 131.2, 129.8, 128.7, 128.6, 127.8, 120.3, 77.4, 73.6, 36.3, 21.6; IR (Neat) $\nu_{\max}$  1730, 1349, 1320, 1158, 1105, 1012, 849, 682 cm<sup>-1</sup>; HRMS (ESI) for C<sub>19</sub>H<sub>17</sub>NNaO<sub>4</sub>S (M+Na)<sup>+</sup>: calcd 378.0776, found 378.0779.

**(E)-1-(N-Methyl-4-nitrophenylsulfonamido)-2-phenylvinyl propiolate (6h):**

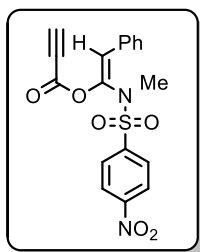

Following the general procedure GP-3, compound **6h** (112 mg) was obtained in 96% yield as colorless solid; mp = 132–134 °C;  $R_f$  = 0.38 (3:2 hexane/EtOAc); [Silica, UV and I<sub>2</sub>]; <sup>1</sup>H NMR (600 MHz, CDCl<sub>3</sub>): δ 8.33 (d,  $J$  = 8.4 Hz, 2H), 8.07 (d,  $J$  = 8.4 Hz, 2H), 7.48 (d,  $J$  = 7.2 Hz, 2H), 7.37 (t,  $J$  = 6.6 Hz, 2H), 7.33 (d,  $J$  = 7.2 Hz, 1H), 6.38 (s, 1H), 3.08 (s, 3H), 3.07 (s, 1H); <sup>13</sup>C NMR (151 MHz, CDCl<sub>3</sub>) δ 150.3, 150.1, 144.0, 137.9, 130.7, 129.1, 128.8, 128.5, 124.3, 121.3, 78.1, 73.1, 36.6; IR (Neat) $\nu_{\max}$  1742, 1693, 1527, 1347, 1308, 1104, 1080, 1014, 854, 683, 605 cm<sup>-1</sup>; HRMS (ESI) for C<sub>18</sub>H<sub>15</sub>N<sub>2</sub>O<sub>6</sub>S (M+H)<sup>+</sup>: calcd 387.0651, found 387.0647.

**(E)-2-(4-Chlorophenyl)-1-(N,4-dimethylphenylsulfonamido)vinyl propiolate (6i):**

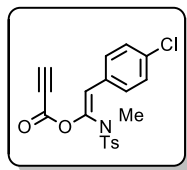

Following the general procedure GP-3, compound **6i** (108 mg) was obtained in 93% yield as colorless solid; mp = 122–124 °C;  $R_f$  = 0.4 (3:2 hexane/EtOAc); [Silica, UV and I<sub>2</sub>]; <sup>1</sup>H NMR (600 MHz, CDCl<sub>3</sub>): δ 7.78 (d,  $J$  = 8.4 Hz, 2H), 7.46 (d,  $J$  = 8.4 Hz, 2H), 7.35–7.29 (m, 4H), 6.27 (s, 1H), 3.02 (s, 1H), 2.98 (s, 3H), 2.44 (s, 3H); <sup>13</sup>C NMR (151 MHz, CDCl<sub>3</sub>) δ 150.4, 144.3, 139.4, 135.2, 134.5, 129.84, 129.80, 128.94, 127.86, 119.4, 77.5, 73.5, 36.2, 21.6; IR (Neat) $\nu_{\max}$  2912, 1713, 1570, 1445, 1337, 1235, 1162, 888, 694 cm<sup>-1</sup>; HRMS (ESI) for C<sub>19</sub>H<sub>16</sub>ClNNaO<sub>4</sub>S (M+Na)<sup>+</sup>: calcd 412.0386, found 412.0381.

**(E)-2-([1,1'-Biphenyl]-4-yl)-1-(N,4-dimethylphenylsulfonamido)vinyl 3-phenylpropiolate (6j):**

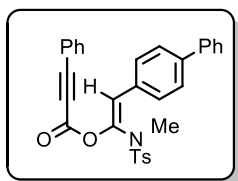

Following the general procedure GP-4, compound **6j** (143 mg) was obtained in 94% yield as colorless solid; mp = 124–126 °C;  $R_f$  = 0.48 (3:2 hexane/EtOAc); [Silica, UV and I<sub>2</sub>]; <sup>1</sup>H NMR (600 MHz, CDCl<sub>3</sub>): δ 7.85 (d,  $J$  = 7.2 Hz, 2H), 7.67–7.58 (m, 8H), 7.53 (bt,  $J$  = 7.2 Hz, 1H), 7.49–7.42 (m, 4H), 7.37 (bt,  $J$  = 7.2 Hz, 1H), 7.29–7.24 (m, 1H), 6.38 (s, 1H), 3.10 (s, 3H), 2.30 (s, 3H); <sup>13</sup>C NMR (151 MHz, CDCl<sub>3</sub>) δ 151.8, 144.0, 141.2, 140.3, 139.3, 135.6, 133.1, 131.3, 130.4, 129.7, 129.1, 128.83, 128.77, 127.9, 127.6, 127.3, 127.0, 119.7, 119.0, 89.2, 79.6, 36.6, 21.5; IR (Neat) $\nu_{\max}$  1709, 1594, 1349, 1159, 1085, 1017, 813, 692, 582 cm<sup>-1</sup>; HRMS (ESI) for C<sub>31</sub>H<sub>25</sub>NNaO<sub>4</sub>S (M+Na)<sup>+</sup>: calcd 530.1402, found 530.1407.

**(E)-2-(4-Chlorophenyl)-1-(N,4-dimethylphenylsulfonamido)vinyl 3-phenylpropiolate (6k):**

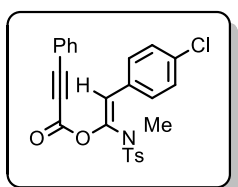

Following the general procedure GP-4, compound **6k** (130 mg) was obtained in 93% yield as colorless solid; mp = 128–130 °C;  $R_f$  = 0.43 (3:2 hexane/EtOAc); [Silica, UV and I<sub>2</sub>]; <sup>1</sup>H NMR (600 MHz, CDCl<sub>3</sub>): δ 7.82 (d,  $J$  = 8.4 Hz, 2H), 7.58 (d,  $J$  = 7.2 Hz, 2H), 7.55–7.48 (m, 3H), 7.44 (t,  $J$  = 7.8 Hz, 2H), 7.36–7.33 (m, 2H), 7.27 (d,  $J$  = 8.4 Hz, 2H), 6.30 (s, 1H), 3.03 (s, 3H), 2.31 (s, 3H); <sup>13</sup>C NMR (151 MHz, CDCl<sub>3</sub>) δ 151.7, 144.2, 139.7, 135.4, 134.4, 133.2, 131.3, 130.0, 129.9, 129.7, 128.9, 128.8, 127.9, 118.9, 89.4, 79.4, 36.4, 21.5; IR (Neat) $\nu_{\max}$  1727, 1355, 1157, 1111, 1086, 812, 750, 653 588 cm<sup>-1</sup>; HRMS (ESI) for C<sub>25</sub>H<sub>20</sub>ClNNaO<sub>4</sub>S (M+Na)<sup>+</sup>: calcd 488.0699, found 488.0694.



**(E)-2-(4-Acetylphenyl)-1-(N-benzyl-4-methylphenylsulfonamido)vinyl 3-phenylpropiolate (6l):**

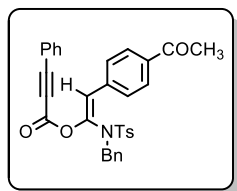

Following the general procedure GP-4, compound **6l** (155 mg) was obtained in 92% yield as colorless solid; mp = 130–132 °C;  $R_f$  = 0.4 (3:2 hexane/EtOAc); [Silica, UV and I<sub>2</sub>]; <sup>1</sup>H NMR (600 MHz, CDCl<sub>3</sub>): δ 7.83 (d,  $J$  = 7.8 Hz, 2H), 7.79 (d,  $J$  = 8.4 Hz, 2H), 7.61–7.50 (m, 3H), 7.46–7.37 (m, 4H), 7.29 (d,  $J$  = 7.8 Hz, 2H), 7.17–7.06 (m, 5H), 6.51 (s, 1H), 4.40 (s, 2H), 2.59 (s, 3H), 2.35 (s, 3H); <sup>13</sup>C NMR (151 MHz, CDCl<sub>3</sub>) δ 197.6, 150.9, 144.2, 138.3, 136.6, 136.3, 135.9, 133.6, 133.1, 131.3, 129.7, 129.6, 128.80, 128.75, 128.3, 128.2, 128.1, 122.4, 119.0, 89.5, 79.5, 52.6, 26.6, 21.5; IR (Neat) $\nu_{\max}$  2219, 1728, 1701, 1348, 1161, 1103, 1044, 810, 709, 683 cm<sup>-1</sup>; HRMS (ESI) for C<sub>33</sub>H<sub>27</sub>NNaO<sub>5</sub>S (M+Na)<sup>+</sup>: calcd 572.1508, found 572.1506.

**(E)-1-(N-Benzyl-4-methylphenylsulfonamido)-2-(thiophen-3-yl)vinyl 3-phenylpropiolate (6m):**

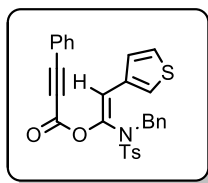

Following the general procedure GP-4, compound **6m** (134 mg) was obtained in 87% yield as colorless solid; mp = 131–133 °C;  $R_f$  = 0.36 (3:2 hexane/EtOAc); [Silica, UV and I<sub>2</sub>]; <sup>1</sup>H NMR (600 MHz, CDCl<sub>3</sub>): δ 7.87 (d,  $J$  = 8.4 Hz, 2H), 7.58–7.48 (m, 3H), 7.43 (t,  $J$  = 7.8 Hz, 2H), 7.36–7.28 (m, 3H), 7.23–7.09 (m, 7H), 6.54 (s, 1H), 4.44 (s, 2H), 2.36 (s, 3H); <sup>13</sup>C NMR (151 MHz, CDCl<sub>3</sub>) δ 151.0, 144.0, 136.0, 133.9, 133.1, 132.5, 131.2, 129.6, 128.7, 128.3, 128.1, 127.7, 126.0, 125.1, 119.1, 118.8, 89.0, 79.6, 52.4, 21.5; IR (Neat) $\nu_{\max}$  2226, 1717, 1350, 1277, 1165, 1150, 1106, 1077, 785, 685, 661 cm<sup>-1</sup>; HRMS (ESI) for C<sub>29</sub>H<sub>23</sub>NNaO<sub>4</sub>S<sub>2</sub> (M+Na)<sup>+</sup>: calcd 536.0966, found 536.0960.

**(E)-1-(2-Oxooxazolidin-3-yl)-2-phenylvinyl 3-phenylpropiolate (6n):**

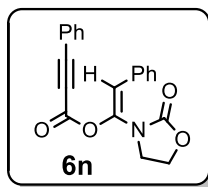

Following the general procedure GP-4, compound **6n** (106 mg) was obtained in 94% yield as pale yellow solid; mp = 126–128 °C;  $R_f$  = 0.42 (3:2 hexane/EtOAc); [Silica, UV and I<sub>2</sub>]; <sup>1</sup>H NMR (600 MHz, CDCl<sub>3</sub>): δ 7.63 (dd,  $J$  = 8.4, 2.4 Hz, 2H), 7.53–7.46 (m, 1H), 7.44–7.29 (m, 7H), 6.42 (s, 1H), 4.43–4.35 (m, 2H), 3.80–3.70 (m, 2H); <sup>13</sup>C NMR (151 MHz, CDCl<sub>3</sub>) δ 155.4, 152.0, 136.6, 133.3, 131.6, 131.2, 128.8, 128.7, 128.5, 128.2, 118.9, 117.4, 89.8, 79.5, 63.2, 44.3; IR (Neat) $\nu_{\max}$  2228,

1724, 1667, 1605, 1349, 1285, 1090, 1052, 653, 543  $\text{cm}^{-1}$ ; HRMS (ESI) for  $\text{C}_{20}\text{H}_{15}\text{NNaO}_4\text{S}$  ( $\text{M}+\text{Na}$ )<sup>+</sup>: calcd 356.0899, found 356.0896.

### Au(I)-Catalyzed Spiro-Heterobicyclization; synthesis of **7/8**: General Procedure 5

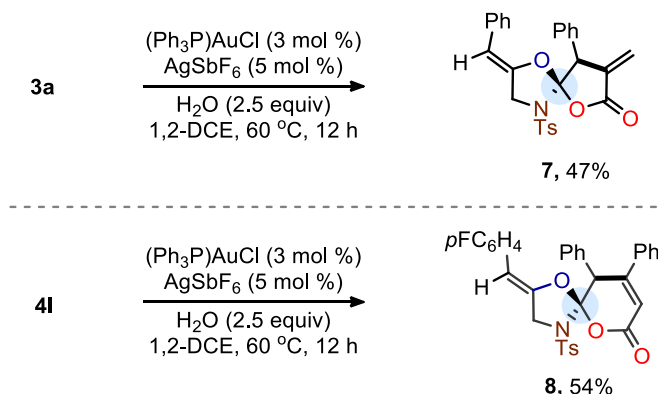

General Procedure 5A: A solution of  $[\text{Au}(\text{PPh}_3)]\text{SbF}_6$  in 1,2-DCE was prepared as following:  $\text{AuCl}(\text{PPh}_3)$  (3 mol%) was dissolved in 1,2-DCE (3 mL). The solution was treated with  $\text{AgSbF}_6$  (5 mol%) and stirred for 10 min.  $\text{AgCl}$  precipitation formed gradually and the supernatant was used for the following reactions.

General Procedure 5B: To a solution of **3a/4I** (1 equiv.) in 1,2-DCE was added water (2.5 equiv.) followed by  $[\text{Au}(\text{PPh}_3)]\text{SbF}_6$  (3 mol%) (obtained from general procedure 5A). The resulting mixture was left to stir at 60 °C. The reaction mixture was monitored until TLC analysis indicated consumption of the starting material. The solution was filtered through a silica gel plug (1:1 hexanes:EtOAc), and the filtrate concentrated. The resulting residue was purified by flash column chromatography to afford the desired cyclized product **7/8**.

**(5S,Z)-2-benzylidene-8-methylene-9-phenyl-4-tosyl-1,6-dioxo-4-azaspiro[4.4]nonan-7-one (7):**

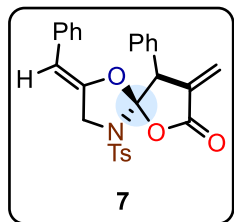

Compound **7** (94 mg, 47%) was obtained as colorless crystalline solid. Mp

= 158–162 °C;  $R_f$  = 0.43 (3:2 hexane/EtOAc); [Silica, UV and I<sub>2</sub>]; <sup>1</sup>H NMR

(400 MHz, CDCl<sub>3</sub>): 7.84 (d,  $J$  = 8.4 Hz, 2H), 7.43–7.39 (m, 3H), 7.33–7.26

(m, 4H), 7.21–7.16 (m, 2H), 7.14–7.09 (m, 1H), 7.08–7.03 (m, 2H), 6.62 (d,  $J$  = 3.6 Hz, 1H), 5.70

(d,  $J$  = 3.2 Hz, 1H), 5.57 (t,  $J$  = 3.4 Hz, 1H), 5.14 (s, 1H), 4.27 (dd,  $J$  = 12.4, 1.2 Hz, 1H), 4.10 (dd,

$J$  = 12.4, 2 Hz, 1H), 2.47 (s, 3H); <sup>13</sup>C{<sup>1</sup>H} NMR (101 MHz, CDCl<sub>3</sub>)  $\delta$  165.8, 145.3, 143.6, 136.5,

133.4, 133.3, 133.1, 130.2, 129.9, 128.8, 128.6, 128.4, 128.0, 127.8, 126.4, 125.3, 117.6, 101.0,

54.0, 49.4, 29.7, 21.6; IR (Neat) $\nu_{\max}$  1723, 1597, 1503, 1151, 1052, 832, 613 cm<sup>-1</sup>; HRMS (ESI)

for C<sub>27</sub>H<sub>24</sub>NO<sub>5</sub>S (M+H)<sup>+</sup>: calcd 474.1370, found 474.1334.

**(5*S*,*Z*)-2-(4-fluorobenzylidene)-9,10-diphenyl-4-tosyl-1,6-dioxo-4-azaspiro[4.5]dec-8-en-7-one (**8**):**

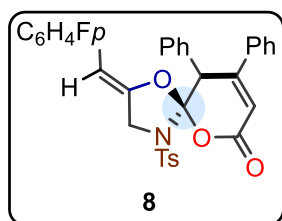

Compound **8** (113 mg, 54%) was obtained as colorless crystalline solid.

Mp = 146–150 °C;  $R_f$  = 0.48 (3:2 hexane/EtOAc); [Silica, UV and I<sub>2</sub>]; <sup>1</sup>H

NMR (500 MHz, CDCl<sub>3</sub>): 7.91 (d,  $J$  = 8.5, 2H), 7.41 (d,  $J$  = 8.0, 2H),

7.31–7.28 (m, 2H), 7.27–7.23 (m, 5H), 7.22–7.18 (m, 2H), 7.15–7.05 (m,

3H), 6.95 (br t,  $J$  = 8.8, 2H), 6.51 (d,  $J$  = 2.0, 1H), 5.79 (d,  $J$  = 2.5, 1H), 5.04 (s, 1H), 4.11 (dd,  $J$  =

12.5, 1.5 Hz, 1H), 3.96 (dd,  $J$  = 12.5, 1.0 Hz, 1H), 2.48 (s, 3H); <sup>13</sup>C{<sup>1</sup>H} NMR (126 MHz, CDCl<sub>3</sub>)

$\delta$  160.1 (d,  $J$  = 291 Hz, 1C), 145.1, 143.9 (d,  $J$  = 9.05 Hz, 1C), 136.2, 134.1, 133.4, 131.5, 129.8,

129.7, 129.23, 129.17, 128.9, 128.5, 128.0, 127.6, 127.4, 127.1, 116.5, 116.4, 115.1 (d,  $J$  = 85.1

Hz, 1C), 99.4, 51.0, 49.3, 21.6; <sup>19</sup>F NMR (376 MHz, CDCl<sub>3</sub>)  $\delta$  -110.48; IR (Neat) $\nu_{\max}$  1731, 1504,

1360, 1107, 743, 724, 633 cm<sup>-1</sup>; HRMS (ESI) for C<sub>33</sub>H<sub>27</sub>FN<sub>2</sub>O<sub>5</sub>S (M+H)<sup>+</sup>: calcd 568.1594, found

568.1594.

**X-ray crystallography:**

1. Single crystal X-ray data for the compound **3g** were collected using the 'Bruker D8 VENTURE Photon III detector' system [Mo-K $\alpha$  fine focus sealed tube  $\lambda$  = 0.71073 Å] at 296K, 298K, and

294K graphite monochromator with a  $\omega$  scan. Data reduction was performed using Bruker SAINT software. Intensities for absorption were corrected using SADABS 2014/5. Structure solution and refinement were carried out using Bruker SHELX-TL.

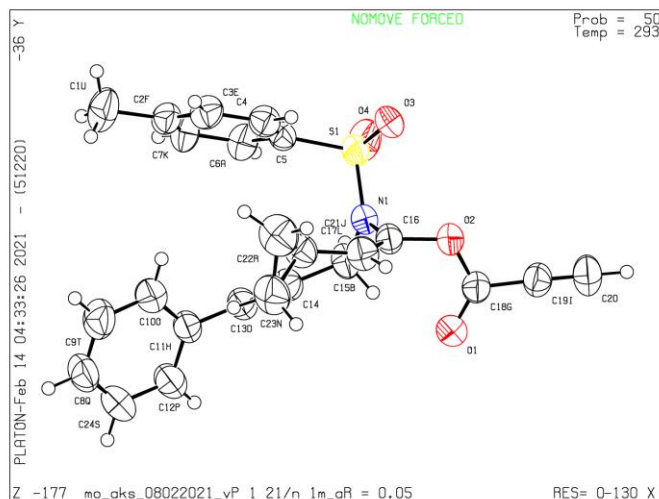

**Figure S1.** Molecular structure of compound **3g** (Oxygen (red), nitrogen (blue), and sulphur (yellow))

| Compound              | <b>3g</b>           |
|-----------------------|---------------------|
| formula               | $C_{24}H_{21}NO_4S$ |
| Formula weight        | 419.50              |
| crystal system        | Monoclinic          |
| space group           | P 1 21/n 1          |
| T [K]                 | 293 K               |
| a [Å]                 | 8.2335(3)           |
| b [Å]                 | 18.3922(8)          |
| c [Å]                 | 14.6378(6)          |
| $\alpha$ [°]          | 90                  |
| $\beta$ [°]           | 104.229(1)          |
| $\gamma$ [°]          | 90                  |
| $V$ [Å <sup>3</sup> ] | 2148.63(15)         |
| Z                     | 4                   |

|                                             |                                          |
|---------------------------------------------|------------------------------------------|
| $\rho_{\text{calcd}}$ [g cm <sup>-3</sup> ] | 1.297                                    |
| $\mu$ [mm <sup>-1</sup> ]                   | 0.181                                    |
| total reflns                                | 5329                                     |
| unique reflns                               | 5318                                     |
| observed                                    | 3710                                     |
| R <sub>1</sub> [I>2 $\sigma$ (I)]           | 0.0476                                   |
| wR2 [all]                                   | 0.1404                                   |
| GOF                                         | 1.056                                    |
| Diffractometer                              | Bruker D8 VENTURE<br>Photon III detector |
| CCDC Number                                 | 2120261                                  |

**Table S2.** Crystallographic data for compound **3g**

2. Single crystal X-ray data for the compound **6b** were collected using the 'Bruker D8 VENTURE Photon III detector' system [Mo-K $\alpha$  fine focus sealed tube  $\lambda$ = 0.71073 Å] at 296K, 298K, and 294K graphite monochromator with a  $\omega$  scan. Data reduction was performed using Bruker SAINT software. Intensities for absorption were corrected using SADABS 2014/5. Structure solution and refinement were carried out using Bruker SHELX-TL.



|                                   |                                          |
|-----------------------------------|------------------------------------------|
| $\mu$ [mm <sup>-1</sup> ]         | 0.164                                    |
| total reflns                      | 6130                                     |
| unique reflns                     | 6113                                     |
| observed                          | 3288                                     |
| R <sub>1</sub> [I>2 $\sigma$ (I)] | 0.0462                                   |
| wR2 [all]                         | 0.1349                                   |
| GOF                               | 1.007                                    |
| Diffractometer                    | Bruker D8 VENTURE<br>Photon III detector |
| CCDC Number                       | 2120262                                  |

**Table S3.** Crystallographic data for compound **6b**

### Hirshfeld Surface Analysis<sup>3</sup>

The Hirshfeld surface images (Fig. 1a & Fig. 1b) in which, the red spots signify the high contact populations, while blue and white spots are for low contact populations. This suggests that the negative (red) or positive value (blue and white) of  $d_{\text{norm}}$  depends on the intermolecular contacts being shorter (red) or longer (blue and white) than the van der Waals separations. For each point on the Hirshfeld surface, the normalized contact distance ( $d_{\text{norm}}$ ) was determined by the equation as shown below.

$$[d_{\text{norm}} = (d_i - d_i^{\text{vdW}})/r_i^{\text{vdW}} + (d_e - d_e^{\text{vdW}})/r_e^{\text{vdW}}]$$

In which  $d_i$  is measured from the surface to the nearest atom interior to the surface interior, while  $d_e$  is measured from the surface to the nearest atom exterior to the surface interior, where  $r_i^{\text{vdW}}$  and  $r_e^{\text{vdW}}$  are the van der Waals radii of the atoms. Hirshfeld surface graphs and two-dimensional

fingerprint plots of **3g** and **6b** (Fig. S3 & Fig. S4) were analyzed using Crystalexplorer 17.5 software.

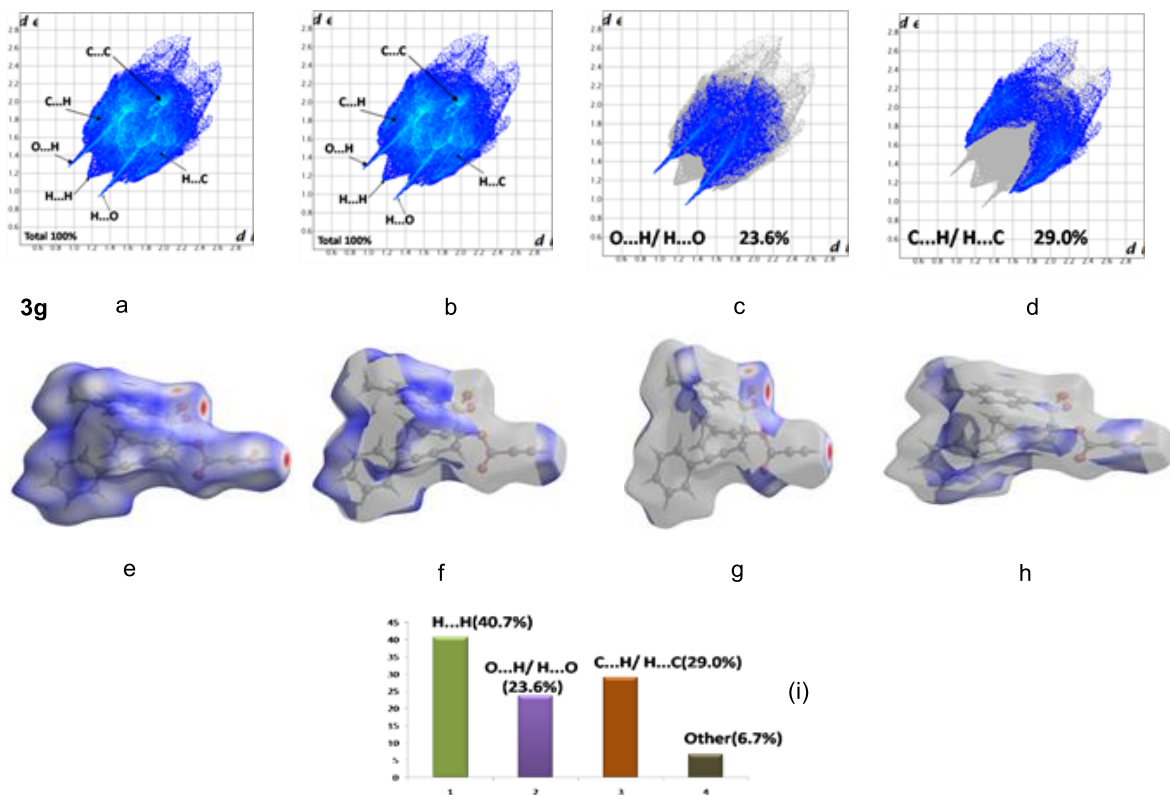

**Figure S3:** Hirshfeld surface calculations and 2D-fingerprint plots of compound **3g**

Hirshfeld surface analysis indicated that H...H, H...C and H...O bond interactions are the primary contributors to the intermolecular stabilization in the crystal. The Hirshfeld surface and subsequent fingerprint plots were calculated for **3g** and **6b** individually, to quantify the intermolecular contacts present within the crystal structures of these compounds (Fig. S3 & Fig. S4). The X-ray single-crystal crystallographic information file of **3g** and **6b** were used as input files.

Significant intermolecular interactions are mapped in Fig. S3 & Fig. S4. On the Hirshfeld surfaces the H...H interactions appear as the largest region 40.7% for **3g** (Fig. S3) and 46.1% for **6b** (Fig. S4) of the fingerprint plot. Two sharp spikes on the fingerprint plot were observed for the O...H/H...O contacts, corresponding to the C...H...O interactions. These spikes are indicative of a strong hydrogen-bond interaction. The C...H/H...C contacts contribute to 29.0% for **3a** (Fig. S3) and 31.13% for **6b** (Fig. S4) of the Hirshfeld surface area.



All other contacts observed were found to contribute less than 6.7% (**3g**) and 1.2% (**6b**). It is therefore clear that the C...H/H...C, O...H/H...O and especially H...H contacts, were the most significant contributors among the interacting atoms. This finding therefore indicates the significance of these contacts in the packing arrangement of the crystal structure. Based on these findings a detailed model was constructed showing the most prominent short range intermolecular contacts that are responsible for the packing arrangement and formation of the three-dimensional network structure of **3g** and **6b** respectively (Fig. S3 & Fig. S4). 2-D column graphs (i) and (r) for **3g** and **6b** show the percentage contributions of the individual atomic contacts to the Hirshfeld surface.

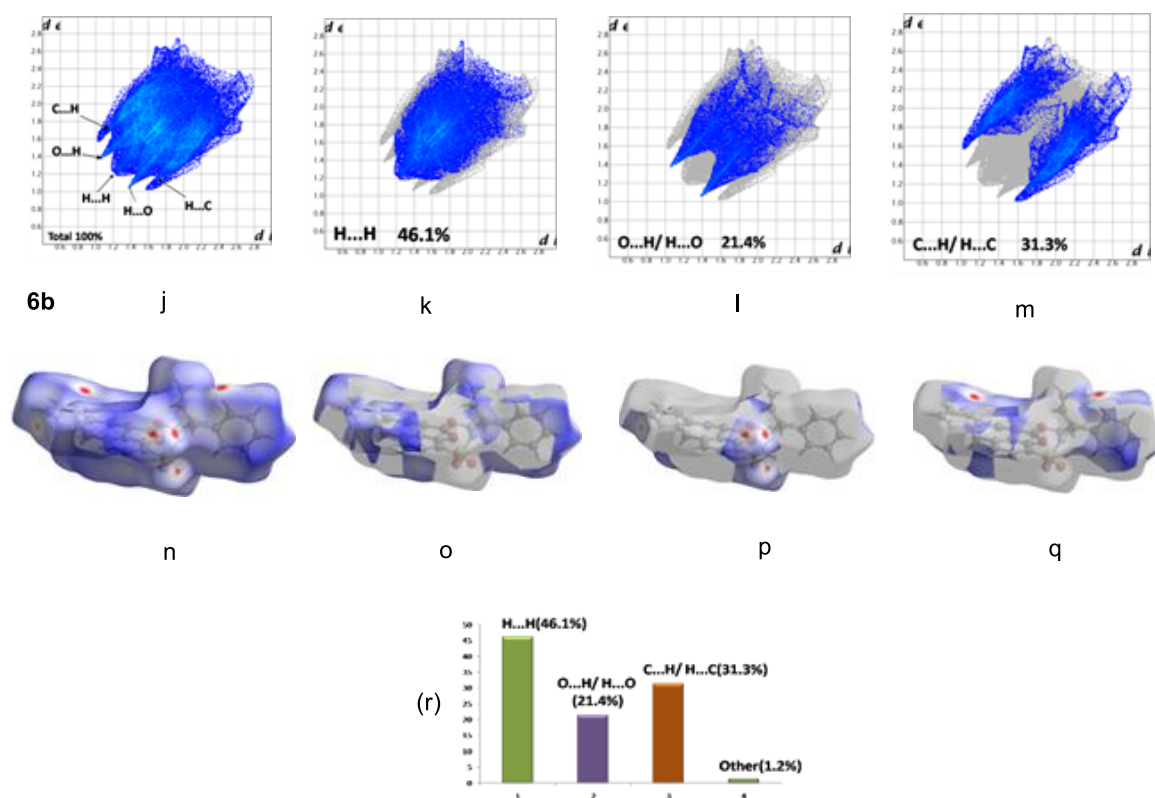

**Figure S4:** Hirshfeld surface calculations and 2D-fingerprint plots of compounds **6b**.

## References

- (1) (a) S. Dutta, R. K. Mallick, R. Prasad, V. Gandon, and A. K. Sahoo, *Angew. Chem. Int. Ed.*, 2019, **58**, 2289–2294; (b) B. Prabagar, S. Nayak, R. K. Mallick, R. Prasad and A. K. Sahoo, *Org. Chem. Front.*, 2016, **3**, 110-115.
- (2) (a) Hyun-Suk Yeom, Jaeyoung Koo, Hyun-Sub Park, Yi Wang, Yong Liang, Zhi-Xiang Yu, and Seunghoon Shin, *J. Am. Chem. Soc.*, 2012, **134**, 208–211; (b) Xia, Xiao-Feng; Zhao, Mingming; He, Wei; Zou, Lianghua; San, Xinxin; Wang, Dawei, *Advanced Synthesis & Catalysis*, 2020 **362**, 3621-3626.
- (3) (a) M. A. Spackman, J. J. McKinnon, *CrystEngComm.*, 2002, **4**, 378–392; (b) M. A. Spackman, D. Jayatilake, Hirshfeld surface analysis, *CrystEngComm.* 2009, **11**, 19–32; (c) C. Zhang, X. Xue, Y. Cao, Y. Zhou, H. Li, J. Zhou, T. Gao, Intermolecular friction symbol derived from crystal information, *CrystEngComm.* 2013, **15**, 6837–6844; (d) M.J. Turner, J.J. McKinnon, S.K. Wolff, D.J. Grimwood, P.R. Spackman, D. Jayatilaka, M.A. Spackman, *Crystal Explorer 17*; University of Western Australia: Perth, Australia, 2017.

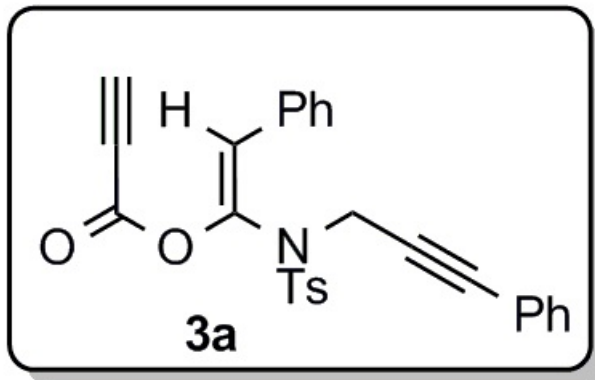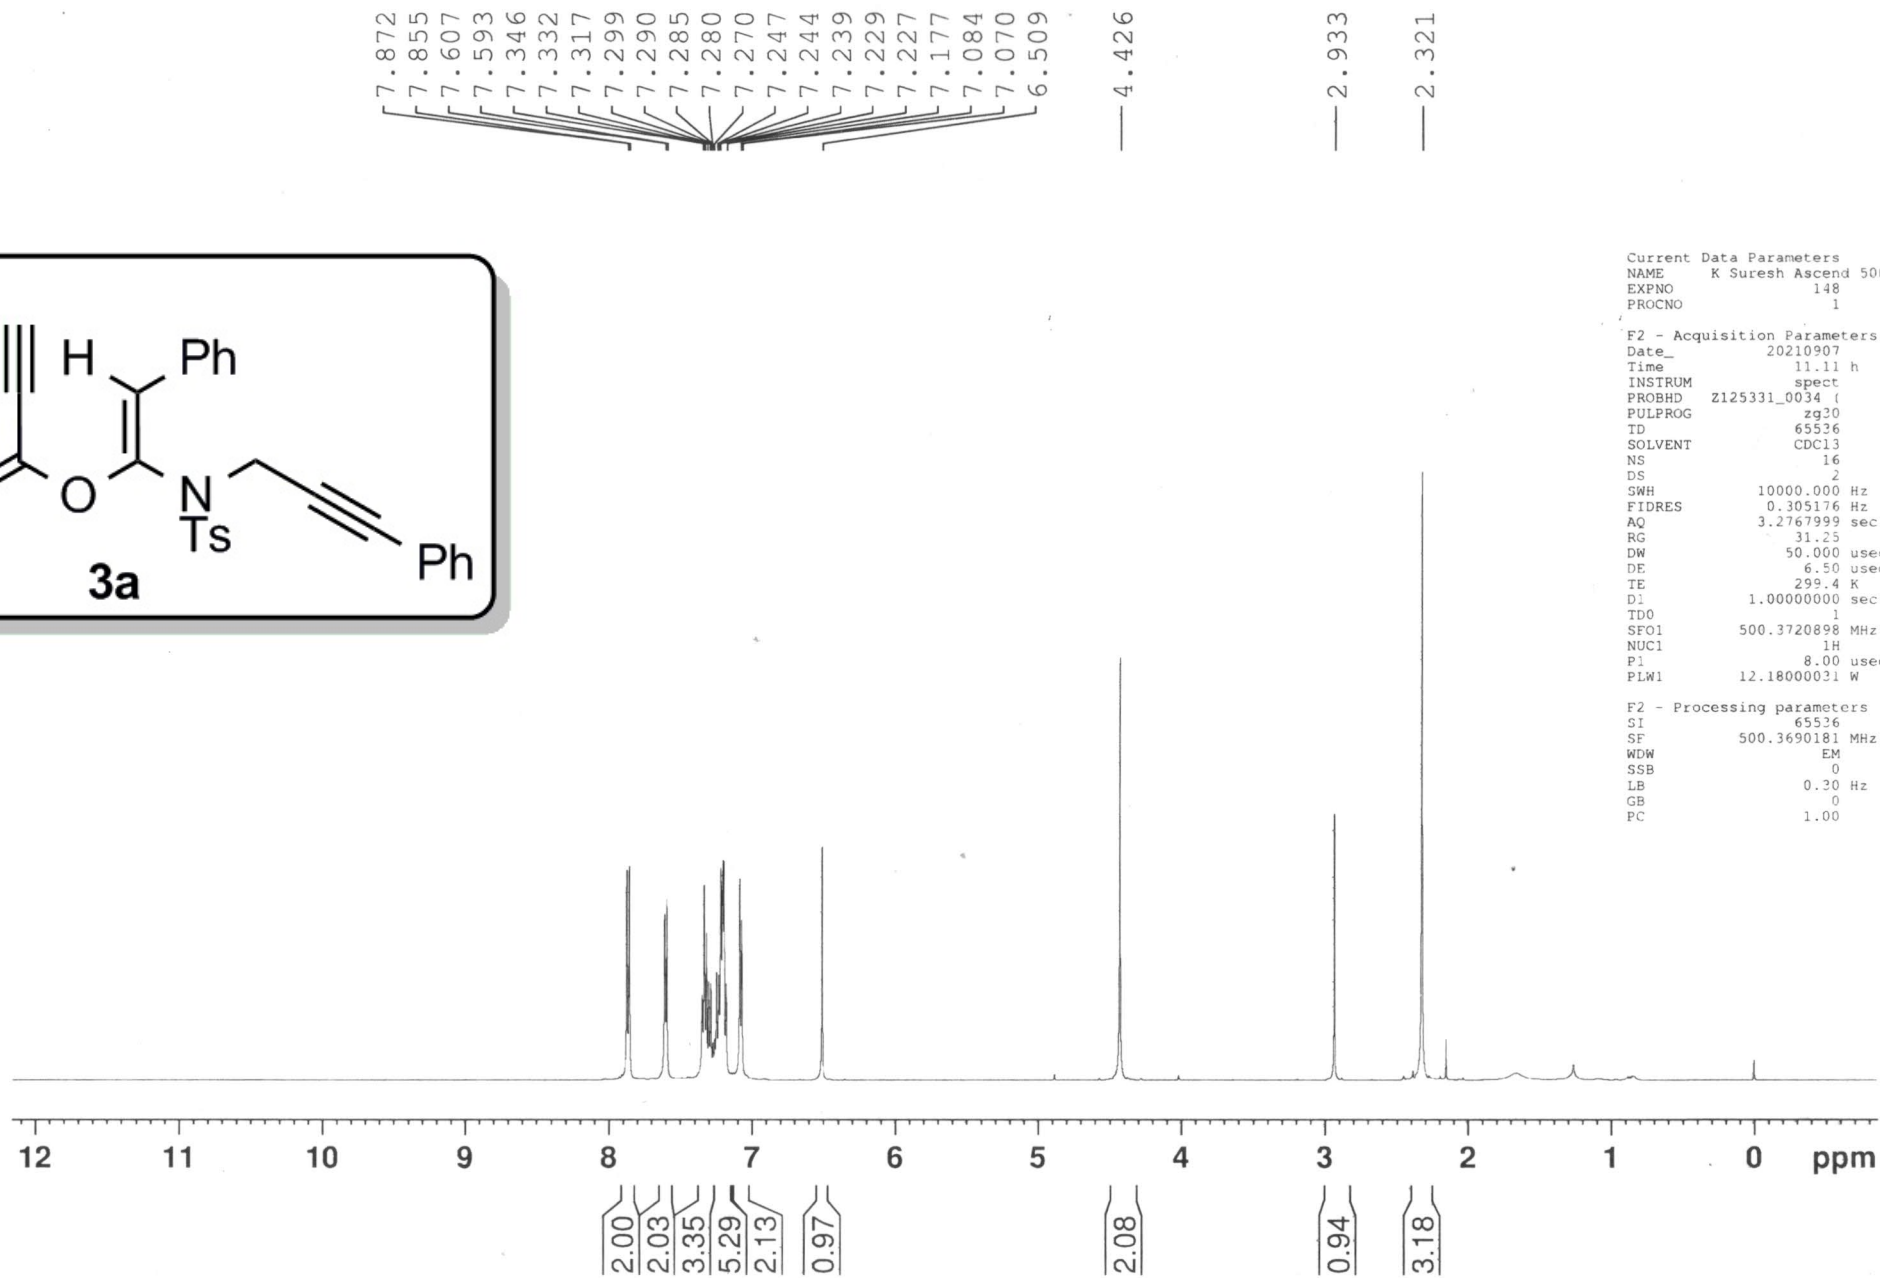

Current Data Parameters  
NAME K Suresh Ascend 500  
EXPNO 148  
PROCNO 1

F2 - Acquisition Parameters  
Date\_ 20210907  
Time 11.11 h  
INSTRUM spect  
PROBHD Z125331\_0034 (   
PULPROG zg30  
TD 65536  
SOLVENT CDCl3  
NS 16  
DS 2  
SWH 10000.000 Hz  
FIDRES 0.305176 Hz  
AQ 3.2767999 sec  
RG 31.25  
DW 50.000 usec  
DE 6.50 usec  
TE 299.4 K  
D1 1.00000000 sec  
TDO 1  
SFO1 500.3720898 MHz  
NUC1 1H  
P1 8.00 usec  
PLW1 12.18000031 W

F2 - Processing parameters  
SI 65536  
SF 500.3690181 MHz  
WDW EM  
SSB 0  
LB 0.30 Hz  
GB 0  
PC 1.00

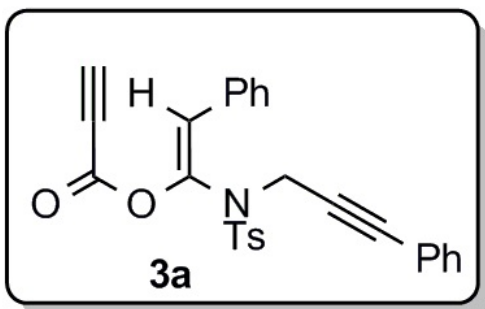

149.90  
144.27  
137.01  
135.98  
131.55  
131.35  
129.41  
128.84  
128.81  
128.59  
128.52  
128.34  
127.91  
123.50  
122.11

85.95  
81.88  
77.25  
77.00  
76.75  
73.75

39.81

21.44

Current Data Parameters  
NAME K Surest Ascend 500  
EXPNO 149  
PROCNO 1

F2 - Acquisition Parameters  
Date\_ 20210907  
Time 11.43 h  
INSTRUM spect  
PROBHD Z125331\_0034\_1  
PULPROG zgpg30  
TD 65536  
SOLVENT CDCl3  
NS 571  
DS 4  
SWH 29761.904 Hz  
FIDRES 0.908261 Hz  
AQ 1.1010048 sec  
RG 19.51  
DW 16.800 usec  
DE 6.50 usec  
TE 299.5 K  
D1 2.0000000 sec  
D11 0.0300000 sec  
TDO  
SFO1 125.830469 MHz  
NUC1 13C  
P1 12.00 usec  
PLW1 172.66999817 W  
SFO2 500.3710015 MHz  
NUC2 1H  
CPOPRG12 waltz16  
PCPD2 80.00 usec  
PLW2 12.1800031 W  
PLW12 0.12180000 W  
PLW13 0.06126500 W

F2 - Processing parameters  
SI 32768  
SF 125.8178955 MHz  
WDW EM  
SSB 0  
LB 1.00 Hz  
GB 0  
PC 1.40

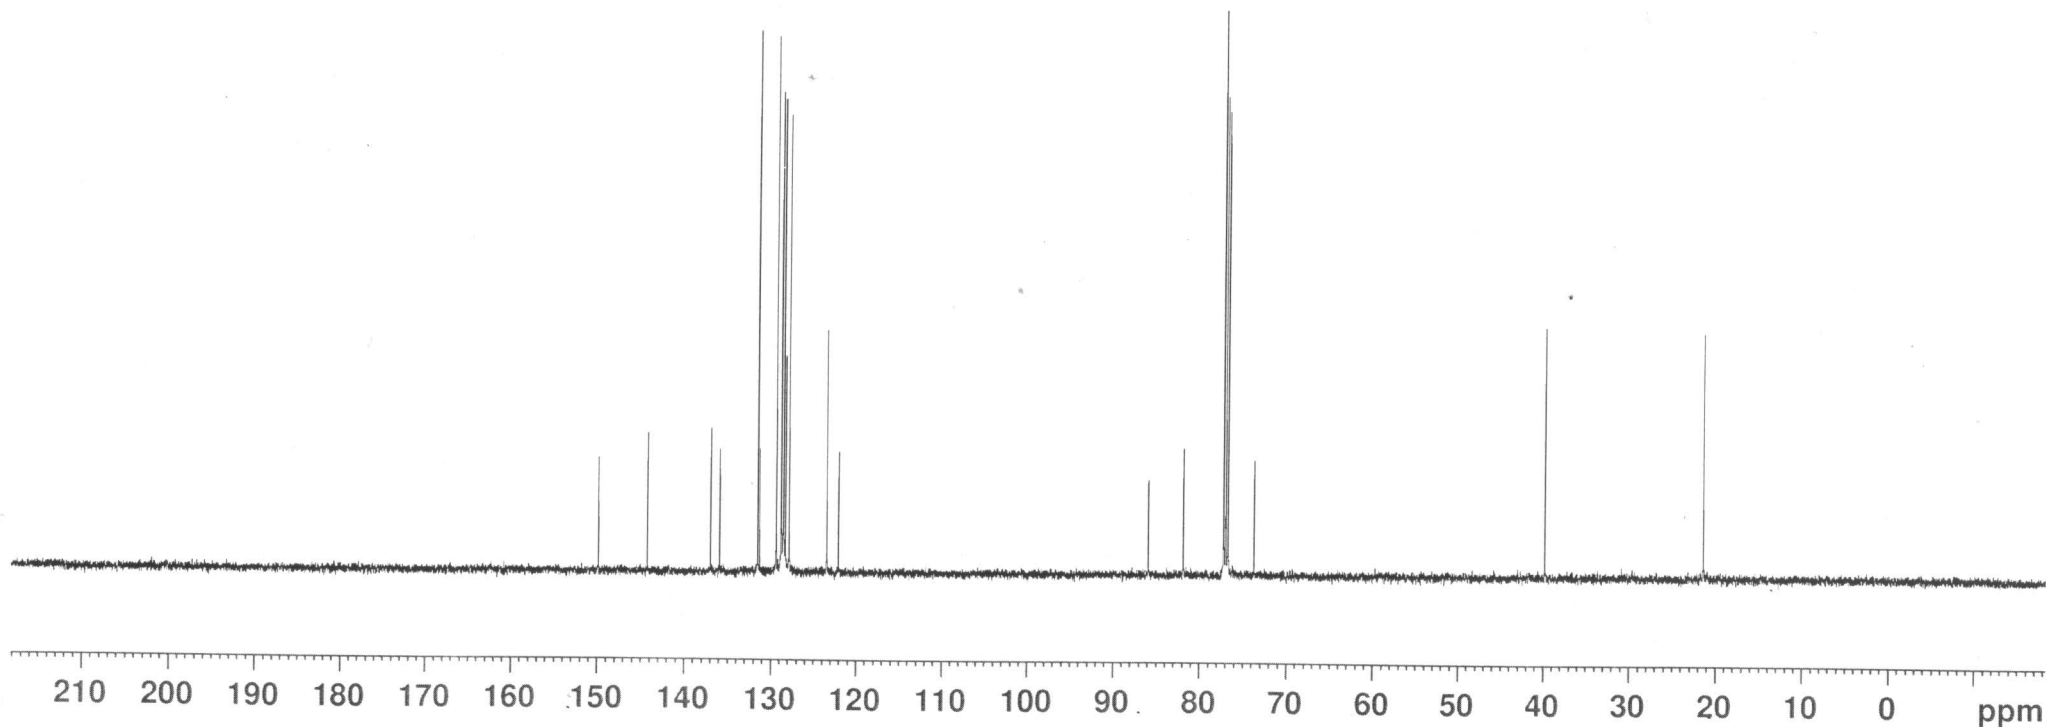

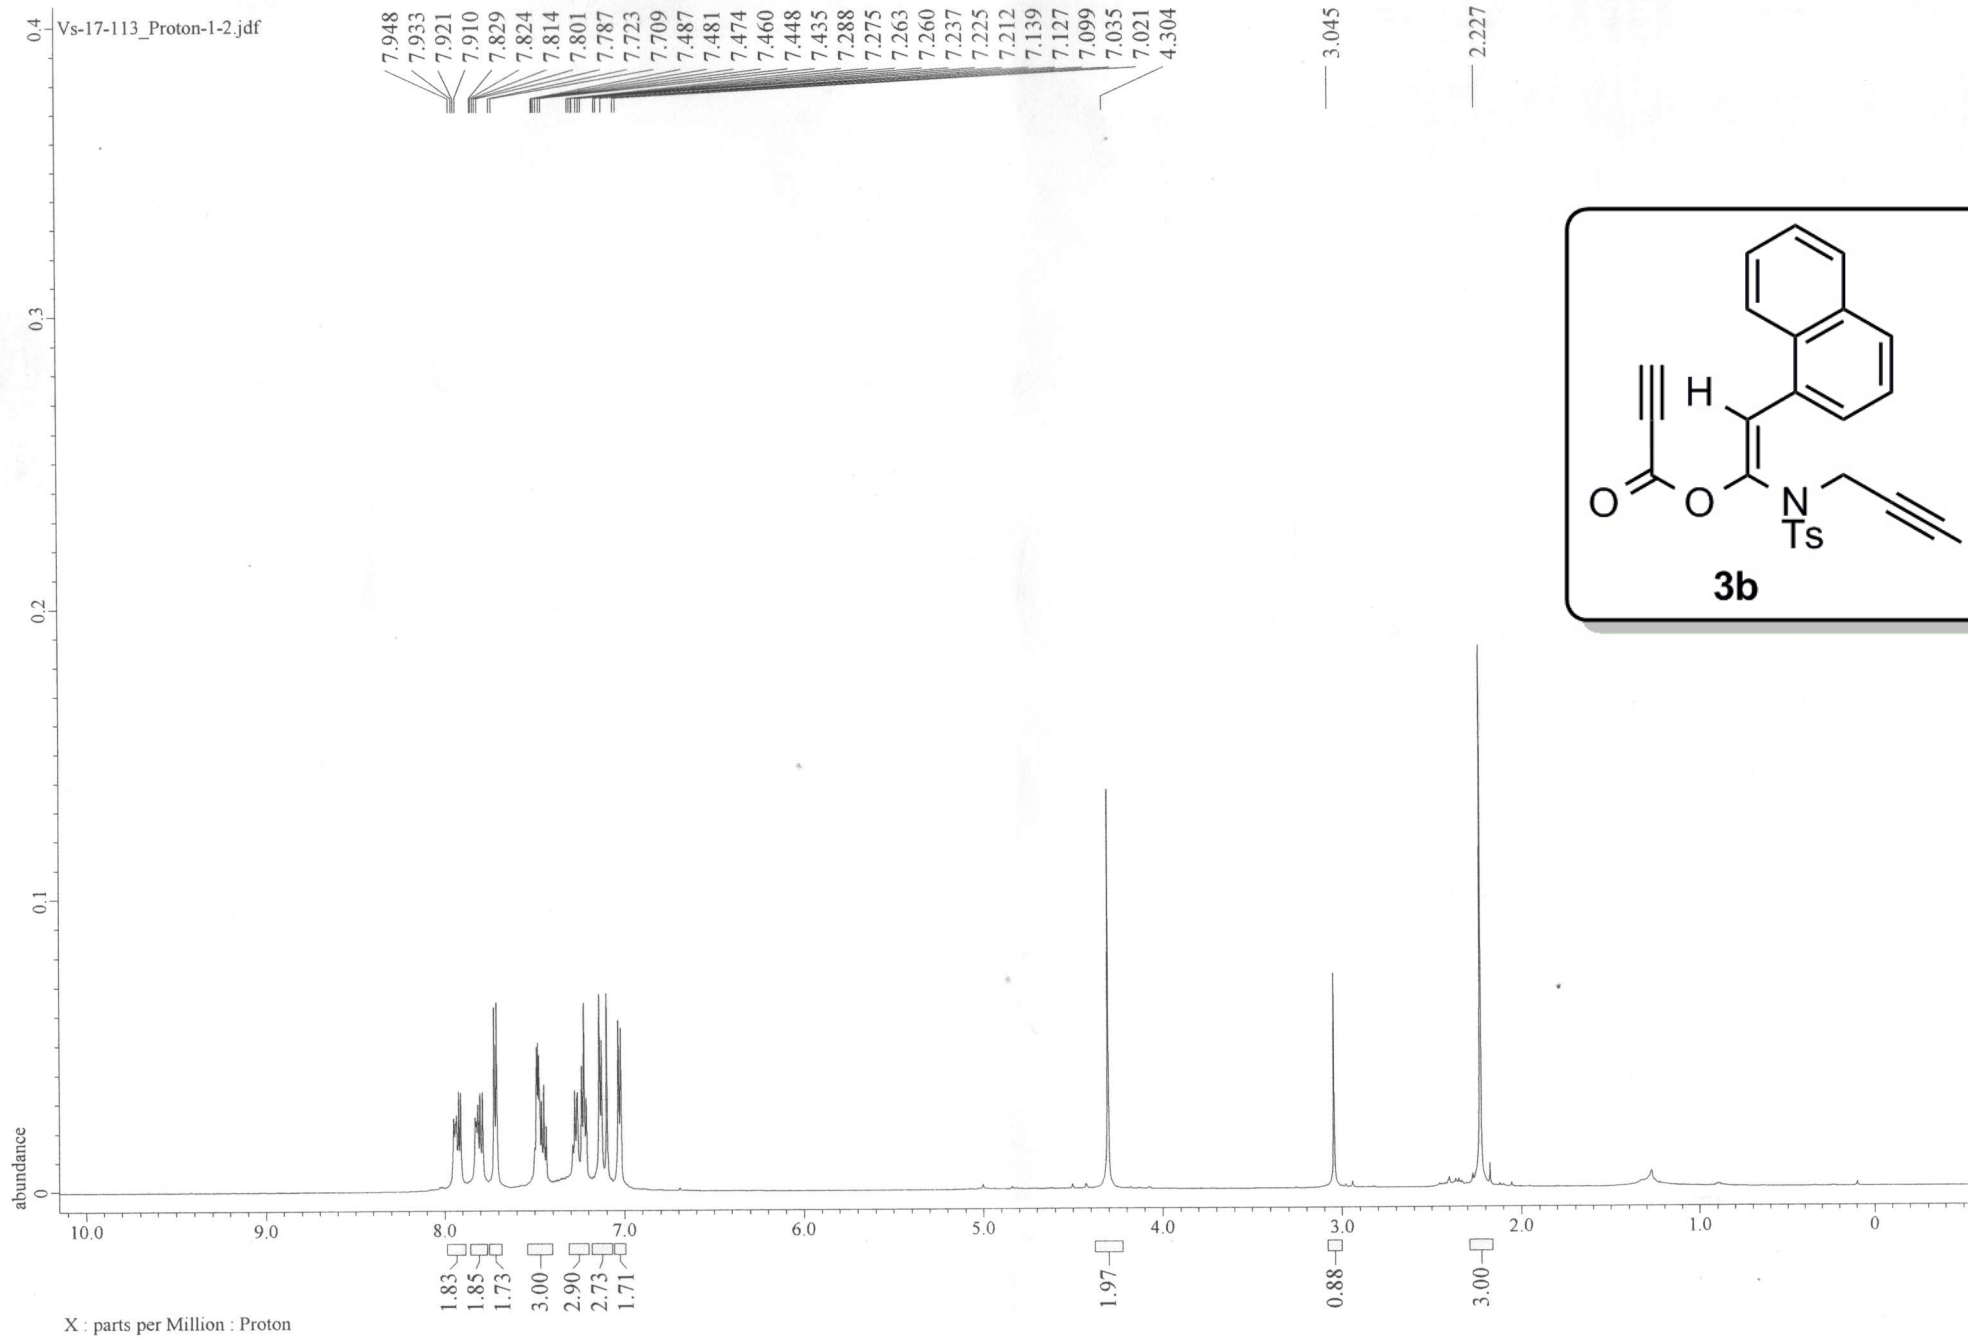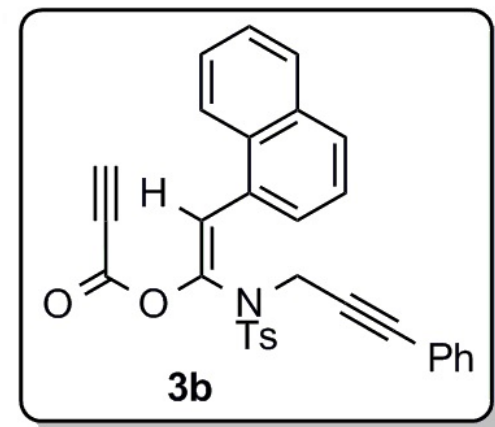

X : parts per Million : Proton

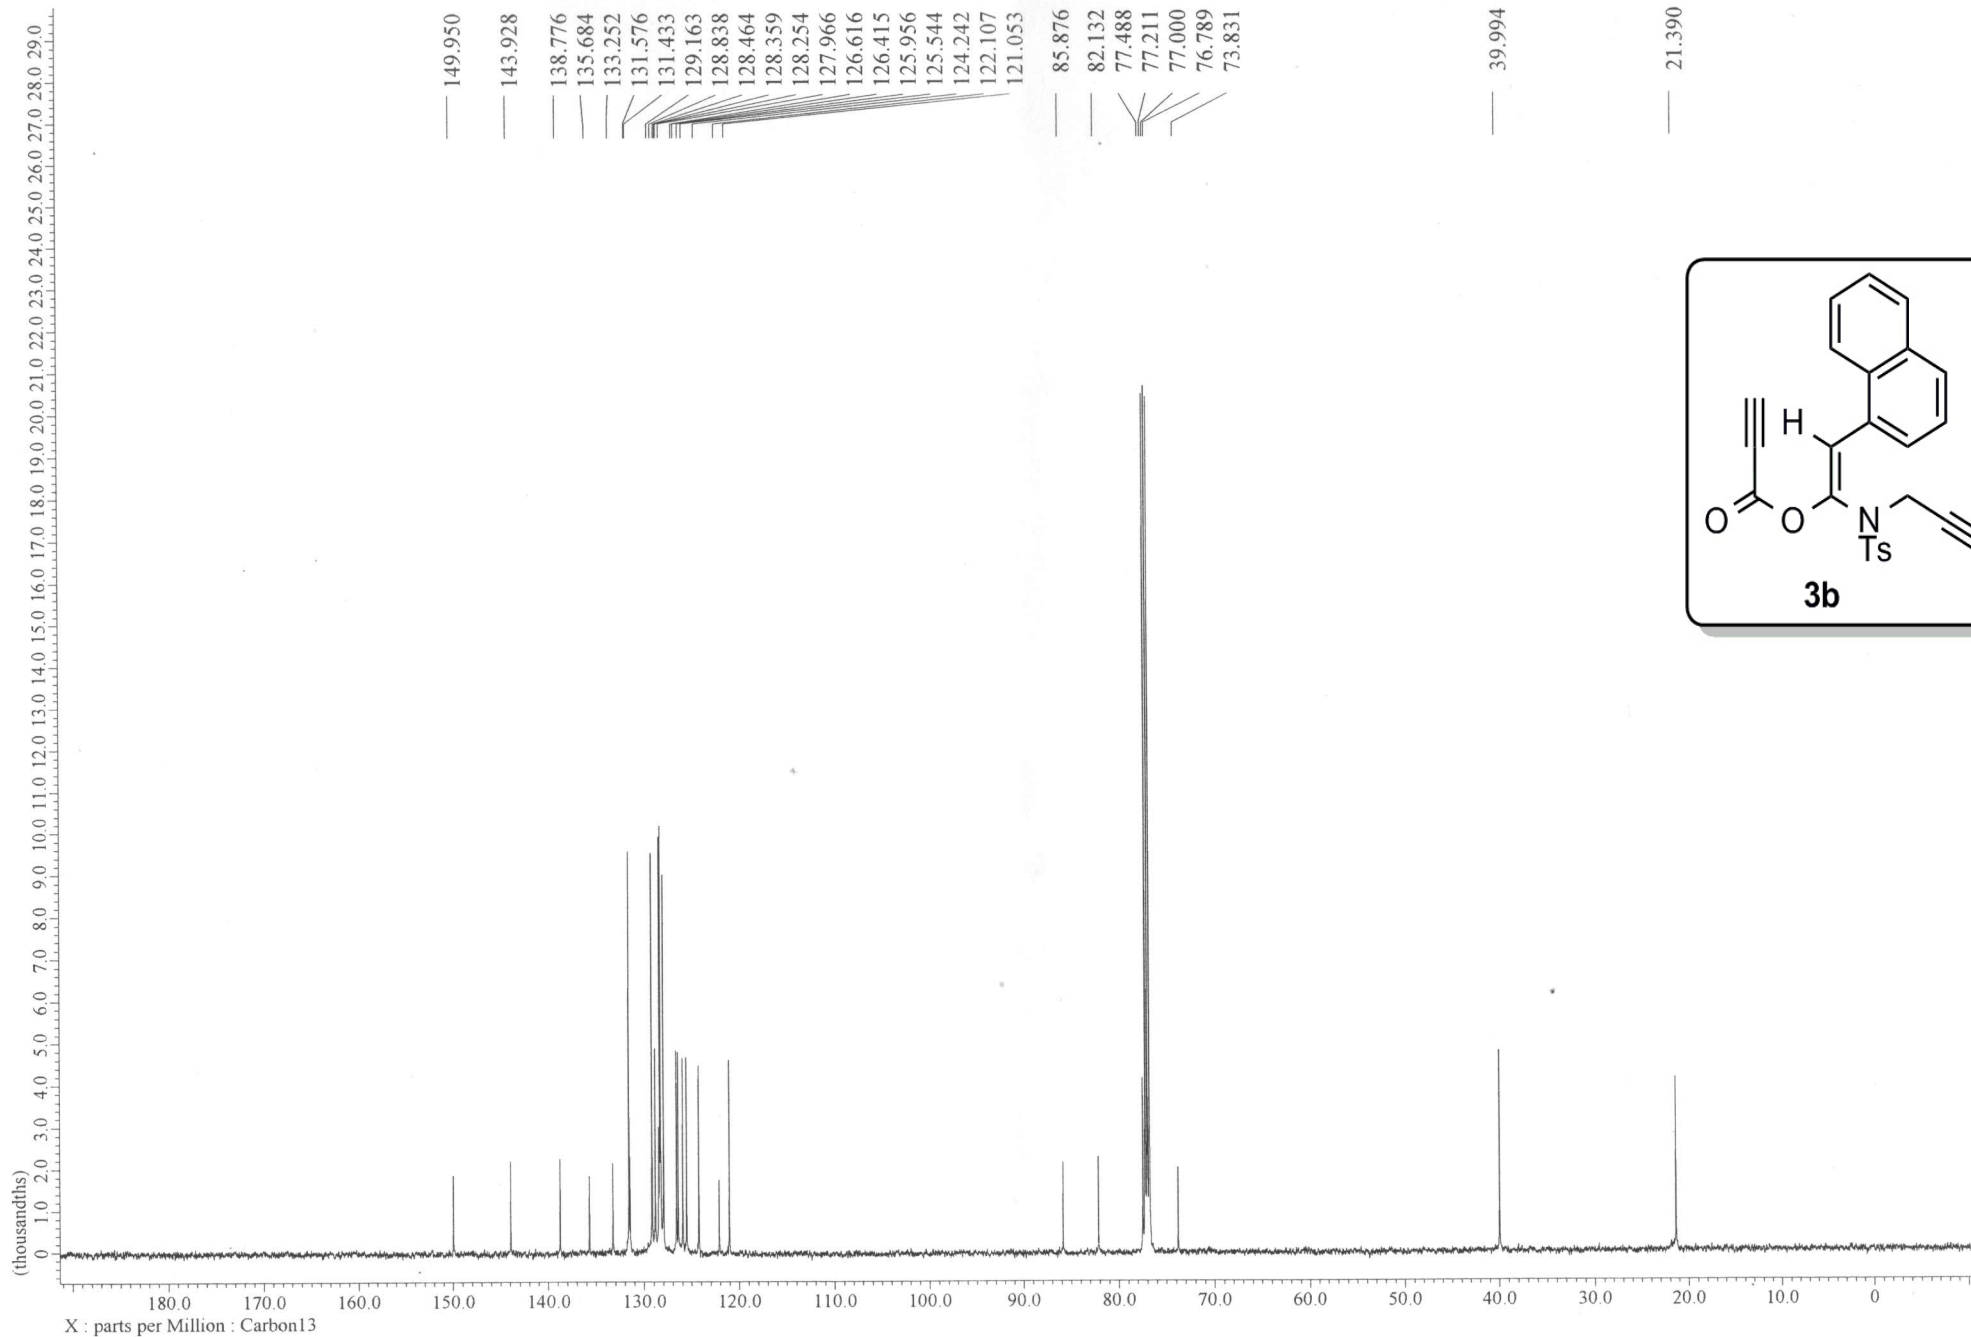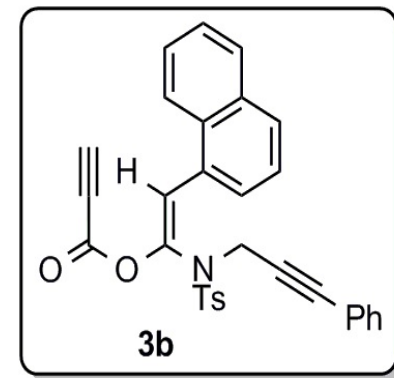

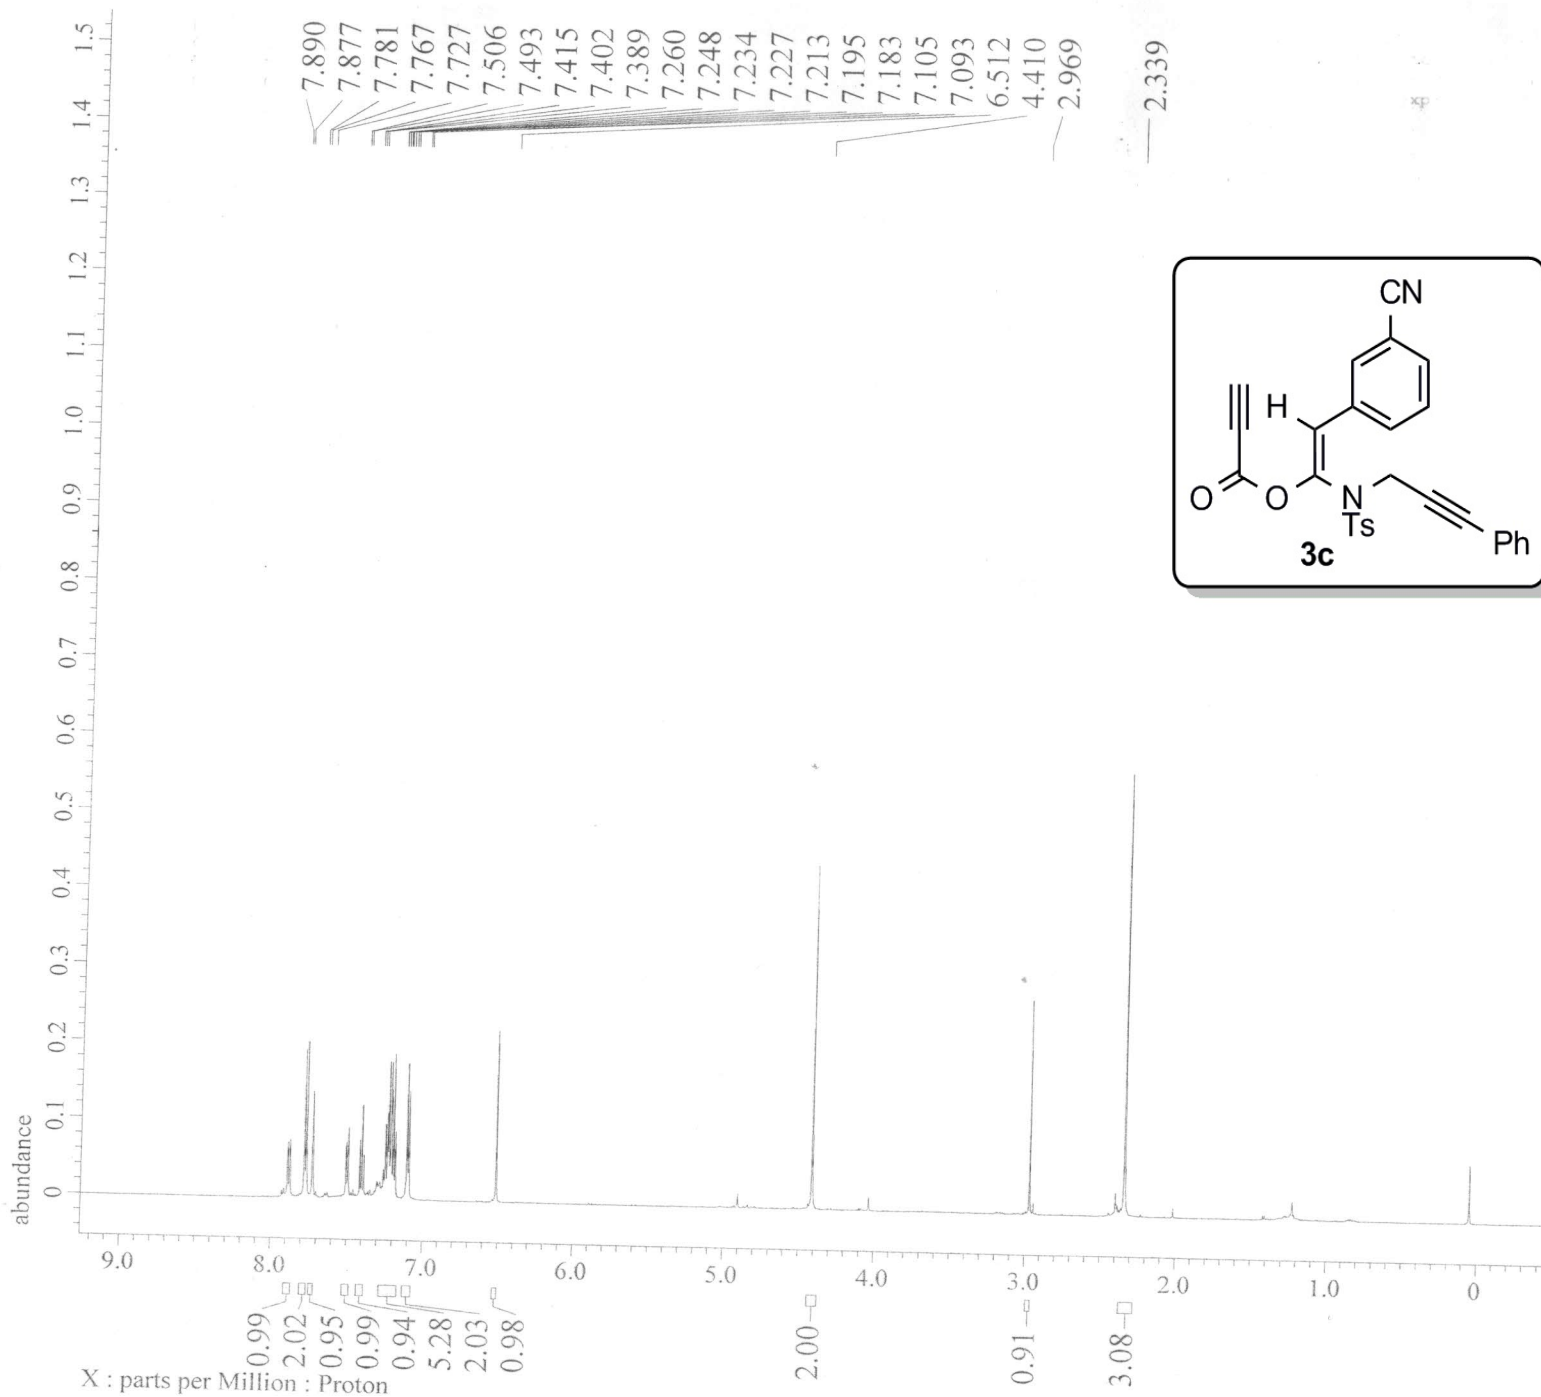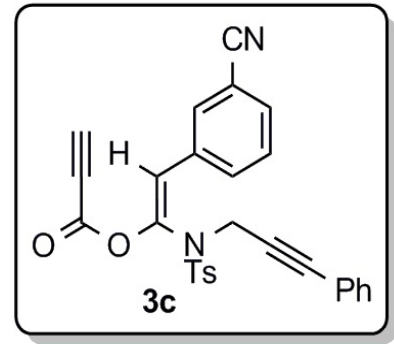

|                       |                         |
|-----------------------|-------------------------|
| Filename              | = vs-17-108_proton-1-3. |
| Author                | = delta                 |
| Experiment            | = proton auto.jxp       |
| Sample Id             | = vs-17-108             |
| Solvent               | = CHLOROFORM-D          |
| Actual_Start Time     | = 23-JAN-2021 13:30:43  |
| Revision_Time         | = 2-NOV-2021 18:39:02   |
| Comment               | = single_pulse          |
| Data Format           | = 1D_COMPLEX            |
| Dim Size              | = 52429                 |
| X_Domain              | = Proton                |
| Dim_Title             | = Proton                |
| Dim_Units             | = [ppm]                 |
| Dimensions            | = X                     |
| Site                  | = ACRHEM_UOH            |
| Spectrometer          | = JNM-ECZ600R/M1        |
| Field_Strength        | = 14.09636928[T] (600[M |
| X_Acq_Duration        | = 0.72876032[s]         |
| X_Domain              | = Proton                |
| X_Freq                | = 600.1723046[MHz]      |
| X_Offset              | = 6.5[ppm]              |
| X_Points              | = 16384                 |
| X_Prescans            | = 1                     |
| X_Resolution          | = 1.37219326[Hz]        |
| X_Sweep               | = 22.48201439[kHz]      |
| X_Sweep_Clippped      | = 17.98561151[kHz]      |
| Irr_Domain            | = Proton                |
| Irr_Freq              | = 600.1723046[MHz]      |
| Irr_Offset            | = 5[ppm]                |
| Tri_Domain            | = Proton                |
| Tri_Freq              | = 600.1723046[MHz]      |
| Tri_Offset            | = 5[ppm]                |
| Blanking              | = 2[us]                 |
| Clipped               | = FALSE                 |
| Scans                 | = 16                    |
| Total_Scans           | = 16                    |
| Relaxation_Delay      | = 5[s]                  |
| Recvr_Gain            | = 36                    |
| Temp_Get              | = 19.3[dC]              |
| X_90_Width            | = 6.89[us]              |
| X_Acq_Time            | = 0.72876032[s]         |
| X_Angle               | = 45[deg]               |
| X_Atn                 | = 12.6[dB]              |
| X_Pulse               | = 3.445[us]             |
| Irr_Mode              | = Off                   |
| Tri_Mode              | = Off                   |
| Dante_Loop            | = 500                   |
| Dante_Presat          | = FALSE                 |
| Decimation_Rate       | = 0                     |
| Experiment_Path       | = C:\Users\delta\Docume |
| Initial_Wait          | = 1[s]                  |
| Phase                 | = {0, 90, 270, 180, 180 |
| Presat_Time           | = 5[s]                  |
| Presat_Time_Flag      | = FALSE                 |
| Relaxation_Delay_Calc | = 0[s]                  |
| Relaxation_Delay_Temp | = 5[s]                  |
| Repetition_Time       | = 5.72876032[s]         |

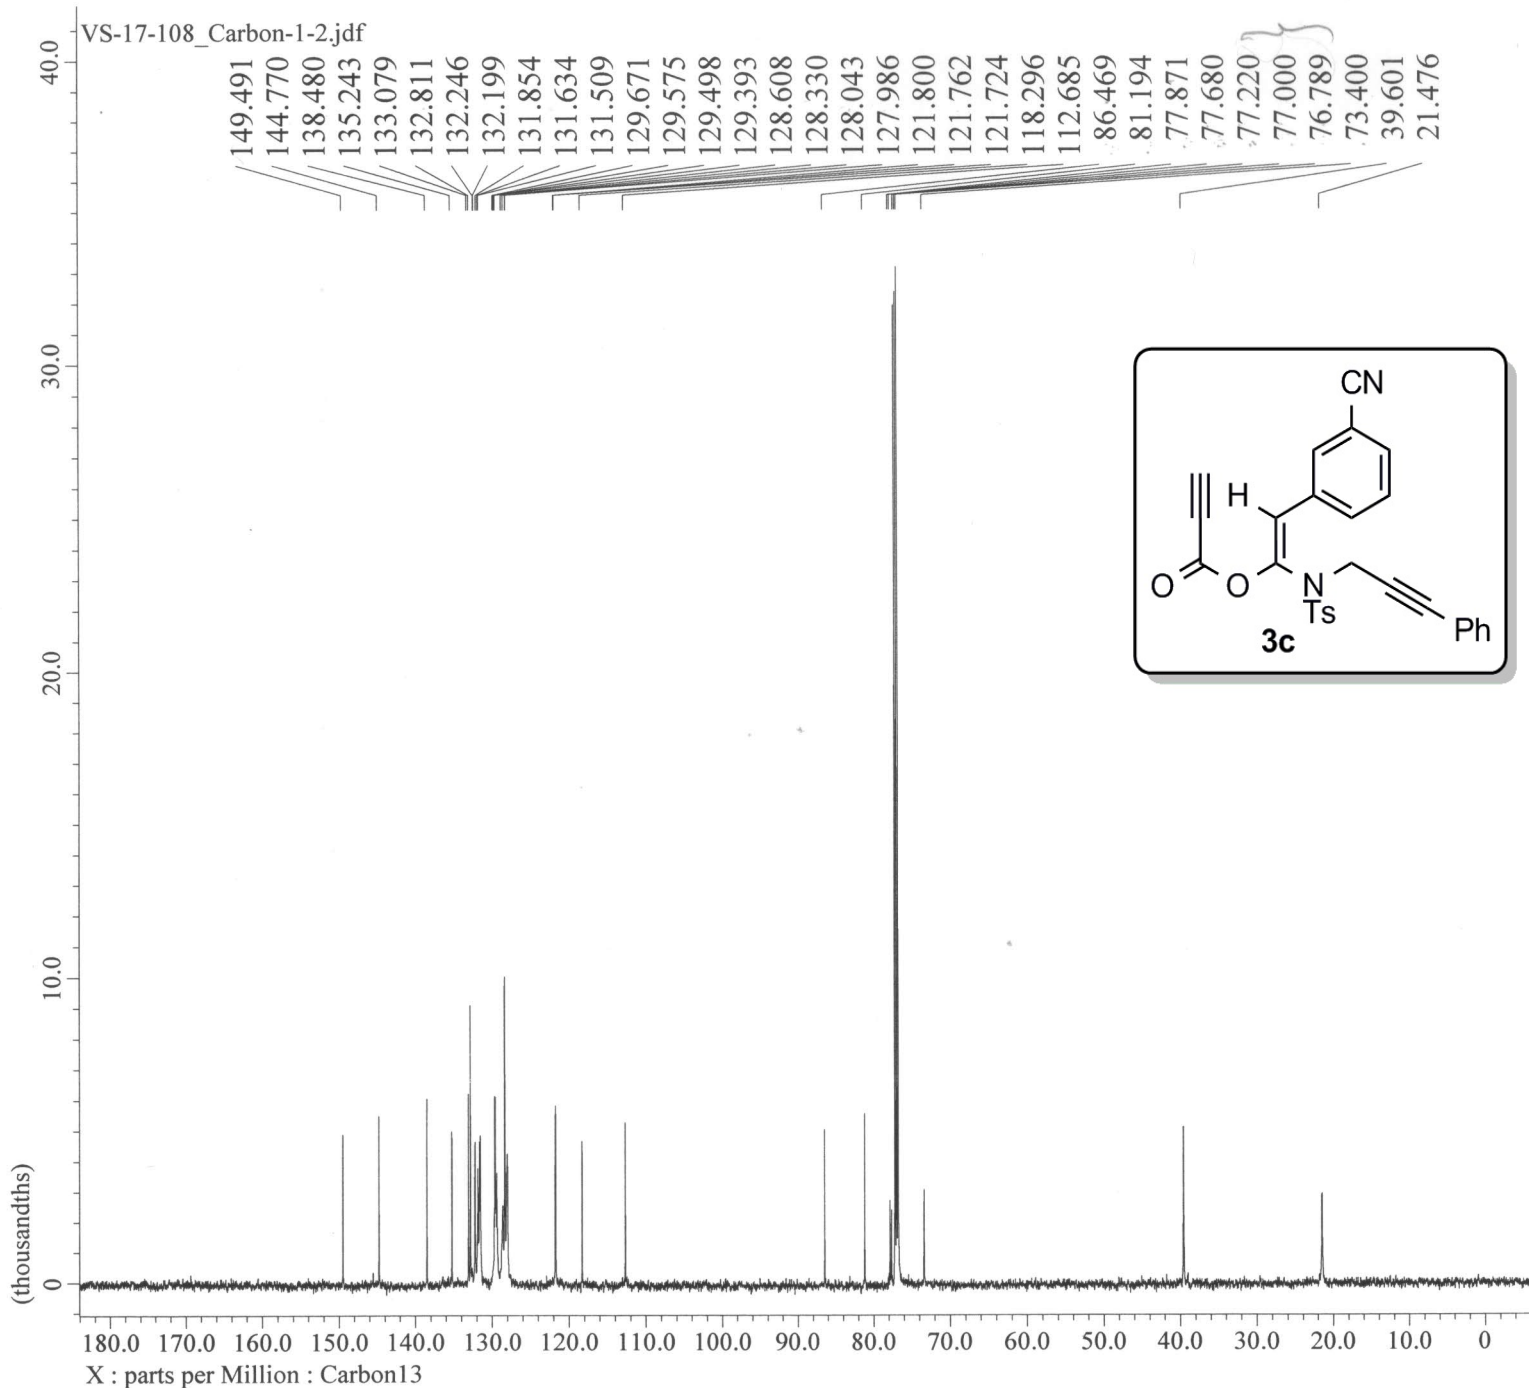

|                          |                      |
|--------------------------|----------------------|
| Filename                 | = VS-17-108_Carbon-1 |
| Author                   | = delta              |
| Experiment               | = carbon_auto.jxp    |
| Sample_Id                | = VS-17-108          |
| Solvent                  | = CHLOROFORM-D       |
| Actual_Start_Time        | = 25-JAN-2021 11:01: |
| Revision_Time            | = 25-JAN-2021 18:56: |
| Comment                  | = single pulse decou |
| Data_Format              | = 1D COMPLEX         |
| Dim_Size                 | = 26214              |
| X_Domain                 | = Carbon13           |
| Dim_Title                | = Carbon13           |
| Dim_Units                | = [ppm]              |
| Dimensions               | = X                  |
| Site                     | = ACRHEM UOH         |
| Spectrometer             | = JNM-ECZ600R/M1     |
| Field_Strength           | = 14.09636928[T] (60 |
| X_Acq_Duration           | = 0.34603008[s]      |
| X_Domain                 | = Carbon13           |
| X_Freq                   | = 150.91343039[MHz]  |
| X_Offset                 | = 100[ppm]           |
| X_Points                 | = 16384              |
| X_Prescans               | = 4                  |
| X_Resolution             | = 2.88992217[Hz]     |
| X_Sweep                  | = 47.34848485[kHz]   |
| X_Sweep_Clipped          | = 37.87878788[kHz]   |
| Irr_Domain               | = Proton             |
| Irr_Freq                 | = 600.1723046[MHz]   |
| Irr_Offset               | = 5[ppm]             |
| Blanking                 | = 2[us]              |
| Clipped                  | = FALSE              |
| Scans                    | = 683                |
| Total_Scans              | = 683                |
| Relaxation_Delay         | = 2[s]               |
| Recvr_Gain               | = 56                 |
| Temp_Get                 | = 19.6[degC]         |
| X_90_Width               | = 11[us]             |
| X_Acq_Time               | = 0.34603008[s]      |
| X_Angle                  | = 30[deg]            |
| X_Atn                    | = 10.3[dB]           |
| X_Pulse                  | = 3.66666667[us]     |
| Irr_Atn_Dec              | = 33.452[dB]         |
| Irr_Atn_Dec_Calc         | = 33.452[dB]         |
| Irr_Atn_Dec_Default_Calc | = 33.452[dB]         |
| Irr_Atn_Noise            | = 33.452[dB]         |
| Irr_Dec_Bandwidth_Hz     | = 7.23684211[kHz]    |
| Irr_Dec_Bandwidth_Ppm    | = 12.05794078[ppm]   |
| Irr_Dec_Freq             | = 600.1723046[MHz]   |
| Irr_Dec_Merit_Factor     | = 2.2                |
| Irr_Decoupling           | = TRUE               |
| Irr_Noise                | = TRUE               |
| Irr_Noise                | = WALTZ              |
| Irr_Offset_Default       | = 5[ppm]             |
| Irr_Pwidth               | = 76[us]             |
| Irr_Pwidth_Default       | = 76[us]             |
| Irr_Pwidth_Default_Calc  | = 76[us]             |
| Irr_Pwidth_Temp1         | = 76[us]             |
| Irr_Wurst                | = FALSE              |
| Decimation_Rate          | = 0                  |
| Experiment_Path          | = c:\Program Files\J |
| Initial_Wait             | = 1[s]               |
| Noe_Time                 | = 2[s]               |
| Noe_Time_Flag            | = FALSE              |
| Relaxation_Delay_Calc    | = 0[s]               |
| Relaxation_Delay_Temp    | = 2[s]               |



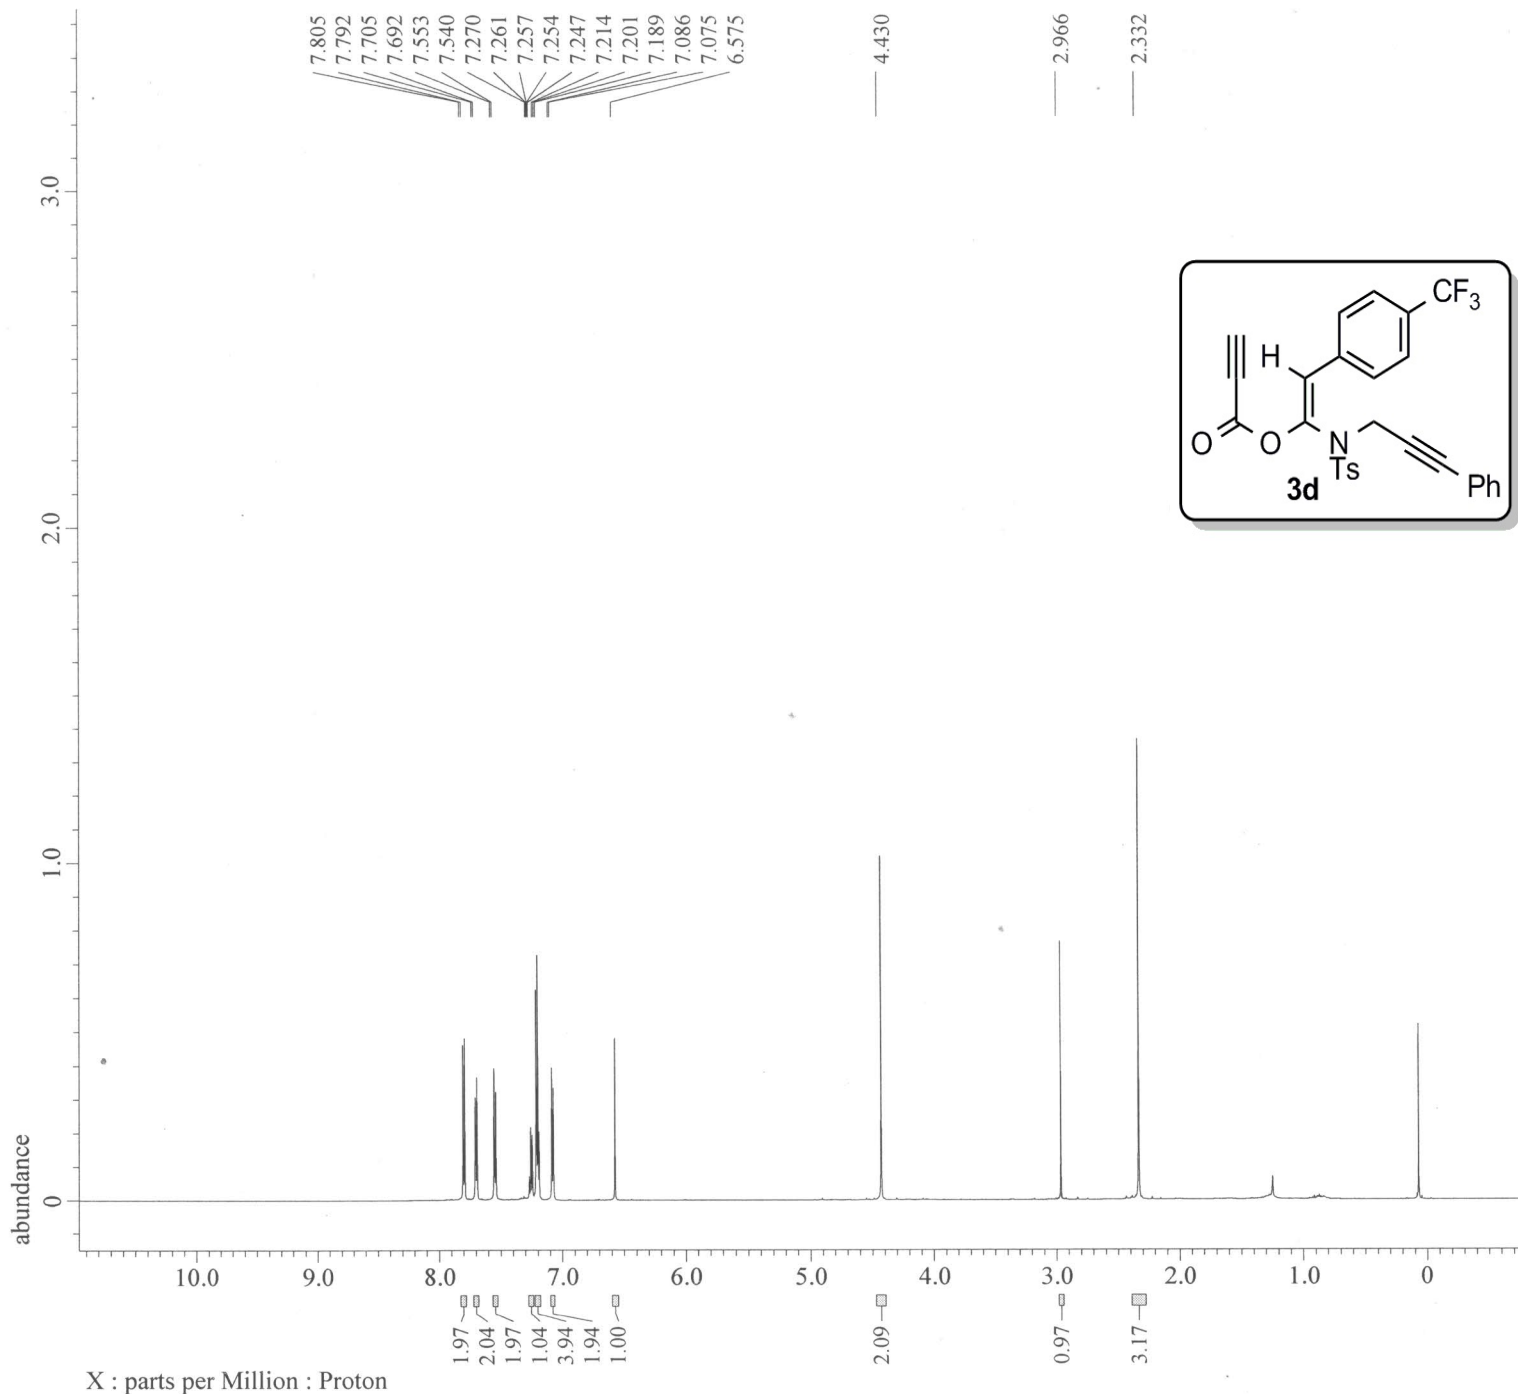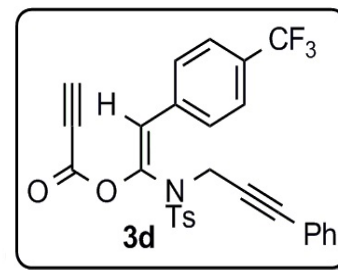

**JEOL**

Filename = vs-19-125\_Proton-1-2.  
 Author = delta  
 Experiment = proton\_auto.jxp  
 Sample\_Id = vs-19-125  
 Solvent = CHLOROFORM-D  
 Actual\_Start\_Time = 22-JAN-2021 11:44:53  
 Revision\_Time = 23-JAN-2021 21:19:00

Comment = single pulse  
 Data\_Format = 1D COMPLEX  
 Dim\_Size = 52429  
 X\_Domain = Proton  
 Dim\_Title = Proton  
 Dim\_Units = [ppm]  
 Dimensions = X  
 Site = ACRHEM UOH  
 Spectrometer = JNM-ECZ600R/M1

Field\_Strength = 14.09636928[T] (600[M]  
 X\_Acq\_Duration = 0.72876032[s]  
 X\_Domain = Proton  
 X\_Freq = 600.1723046[MHz]  
 X\_Offset = 5[ppm]  
 X\_Points = 16384  
 X\_Prescans = 1  
 X\_Resolution = 1.37219326[Hz]  
 X\_Sweep = 22.48201439[kHz]  
 X\_Sweep\_Clipped = 17.98561151[kHz]  
 Irr\_Domain = Proton  
 Irr\_Freq = 600.1723046[MHz]  
 Irr\_Offset = 5[ppm]  
 Tri\_Domain = Proton  
 Tri\_Freq = 600.1723046[MHz]  
 Tri\_Offset = 5[ppm]  
 Blanking = 2[us]  
 Clipped = FALSE  
 Scans = 16  
 Total\_Scans = 16

Relaxation\_Delay = 5[s]  
 Recvr\_Gain = 46  
 Temp\_Get = 18.9[dC]  
 X\_90\_Width = 6.89[us]  
 X\_Acq\_Time = 0.72876032[s]  
 X\_Angle = 45[deg]  
 X\_Atn = 12.6[dB]  
 X\_Pulse = 3.445[us]  
 Irr\_Mode = Off  
 Tri\_Mode = Off  
 Dante\_Loop = 500  
 Dante\_Presat = FALSE  
 Decimation\_Rate = 0  
 Experiment\_Path = c:\Program Files\JEOL  
 Initial\_Wait = 1[s]  
 Phase = {0, 90, 270, 180, 180  
 Presat\_Time = 5[s]  
 Presat\_Time\_Flag = FALSE  
 Relaxation\_Delay\_Calc = 0[s]  
 Relaxation\_Delay\_Temp = 5[s]  
 Repetition\_Time = 5.72876032[s]

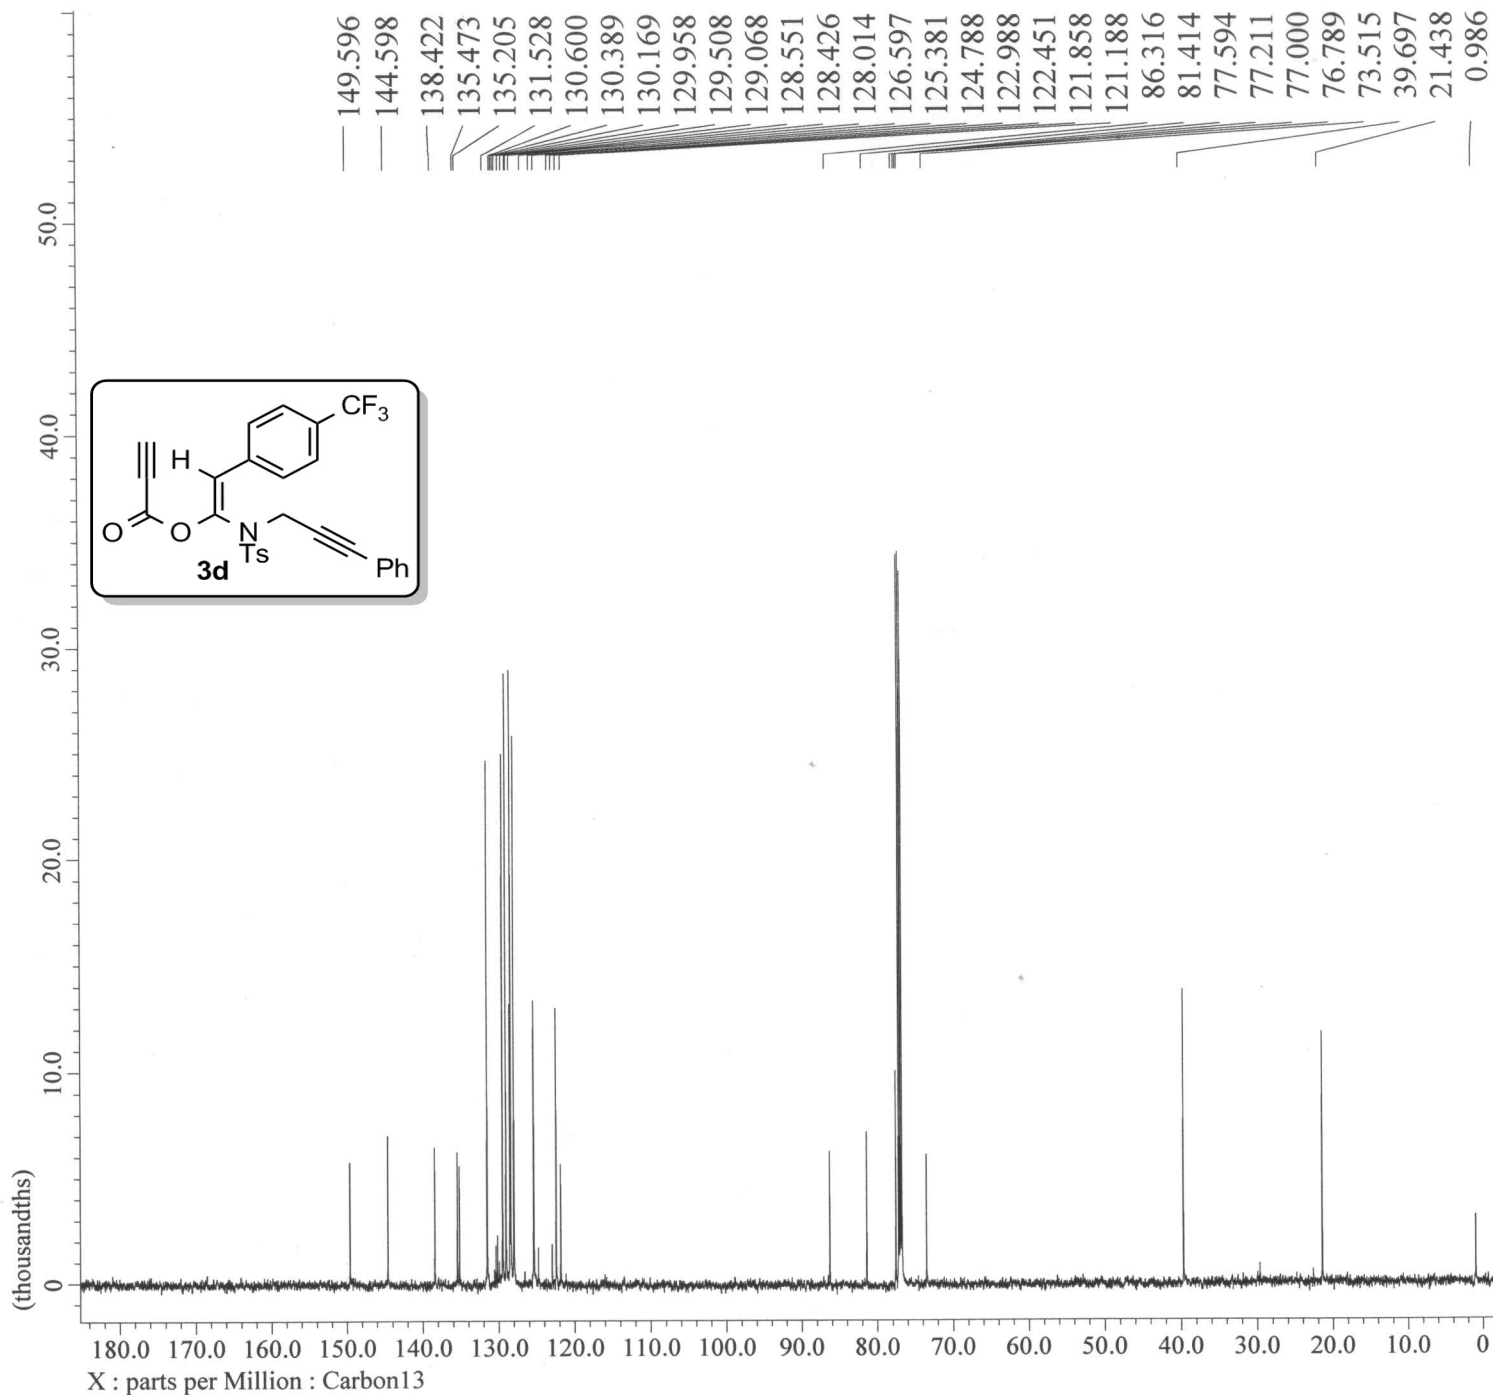

```

Filename           = vs-19-125_Carbon-1
Author            = delta
Experiment        = carbon_auto.jxp
Sample Id         = vs-19-125
Solvent           = CHLOROFORM-D
Actual_Start_Time = 22-JAN-2021 11:47:
Revision_Time     = 16-JUL-2021 00:00:

Comment           = single pulse decou
Data Format        = 1D COMPLEX
Dim_Size          = 26214
X_Domain          = Carbon13
Dim_Title         = Carbon13
Dim_Units         = [ppm]
Dimensions        = X
Site              = ACRHEM_UOH
Spectrometer      = JNM-ECZ600R/M1

Field_Strength    = 14.09636928[T] (60
X_Acq_Duration    = 0.34603008[s]
X_Domain          = Carbon13
X_Freq            = 150.91343039[MHz]
X_Offset          = 100[ppm]
X_Points          = 16384
X_Prescans        = 4
X_Resolution      = 2.88992217[Hz]
X_Sweep           = 47.34848485[kHz]
X_Sweep_Clippped = 37.87878788[kHz]
Irr_Domain        = Proton
Irr_Freq          = 600.1723046[MHz]
Irr_Offset        = 5[ppm]
Blanking          = 2[us]
Clipped           = FALSE
Scans             = 256
Total_Scans       = 256

Relaxation_Delay  = 2[s]
Recvr_Gain        = 56
Temp_Get          = 18.9[dC]
X_90_Width        = 11[us]
X_Acq_Time        = 0.34603008[s]
X_Angle           = 30[deg]
X_Atn             = 10.3[dB]
X_Pulse           = 3.66666667[us]
Irr_Atn_Dec       = 33.452[dB]
Irr_Atn_Dec_Calc = 33.452[dB]
Irr_Atn_Dec_Default_Calc = 33.452[dB]
Irr_Atn_Noise    = 33.452[dB]
Irr_Dec_Bandwidth_Hz = 7.23684211[kHz]
Irr_Dec_Bandwidth_Ppm = 12.05794078[ppm]
Irr_Dec_Freq      = 600.1723046[MHz]
Irr_Dec_Merit_Factor = 2.2
Irr_Decoupling   = TRUE
Irr_Noise         = TRUE
Irr_Noise         = WALTZ
Irr_Offset_Default = 5[ppm]
Irr_Pwidth        = 76[us]
Irr_Pwidth_Default = 76[us]
Irr_Pwidth_Default_Calc = 76[us]
Irr_Pwidth_Temp1 = 76[us]
Irr_Wurst         = FALSE
Decimation_Rate   = 0
Experiment_Path    = c:\Program Files\J
Initial_Wait      = 1[s]
Noe_Time          = 2[s]
Noe_Time_Flag     = FALSE
Relaxation_Delay_Calc = 0[s]
Relaxation_Delay_Temp = 2[s]

```

---62.69

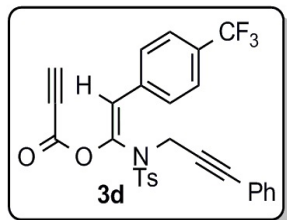

Current Data Parameters  
NAME K SURESH UPDATED 500  
EXPNO 142  
PROCNO 1

F2 - Acquisition Parameters  
Date\_ 20210915  
Time 10.03 h  
INSTRUM spect  
PROBHD z109128\_0042 ( )  
PULPROG zgfhigqn.2  
TD 131072  
SOLVENT CDCl3  
NS 16  
DS 4  
SWH 113636.367 Hz  
FIDRES 1.733953 Hz  
AQ 0.5767168 sec  
RG 456  
DW 4.400 usec  
DE 6.50 usec  
TE 298.1 K  
D1 1.00000000 sec  
D11 0.03000000 sec  
D12 0.00002000 sec  
TD0 1  
SFO1 470.5923603 MHz  
NUC1 19F  
P1 12.00 usec  
PLW1 36.12599945 W  
SFO2 500.1820007 MHz  
NUC2 1H  
CPDPRG[2] waltz16  
PCPD2 80.00 usec  
PLW2 4.84679985 W  
PLW12 0.17039999 W

F2 - Processing parameters  
SI 65536  
SF 470.6394242 MHz  
WDW EM  
SSB 0  
LB 0.30 Hz  
GB 0  
PC 1.00

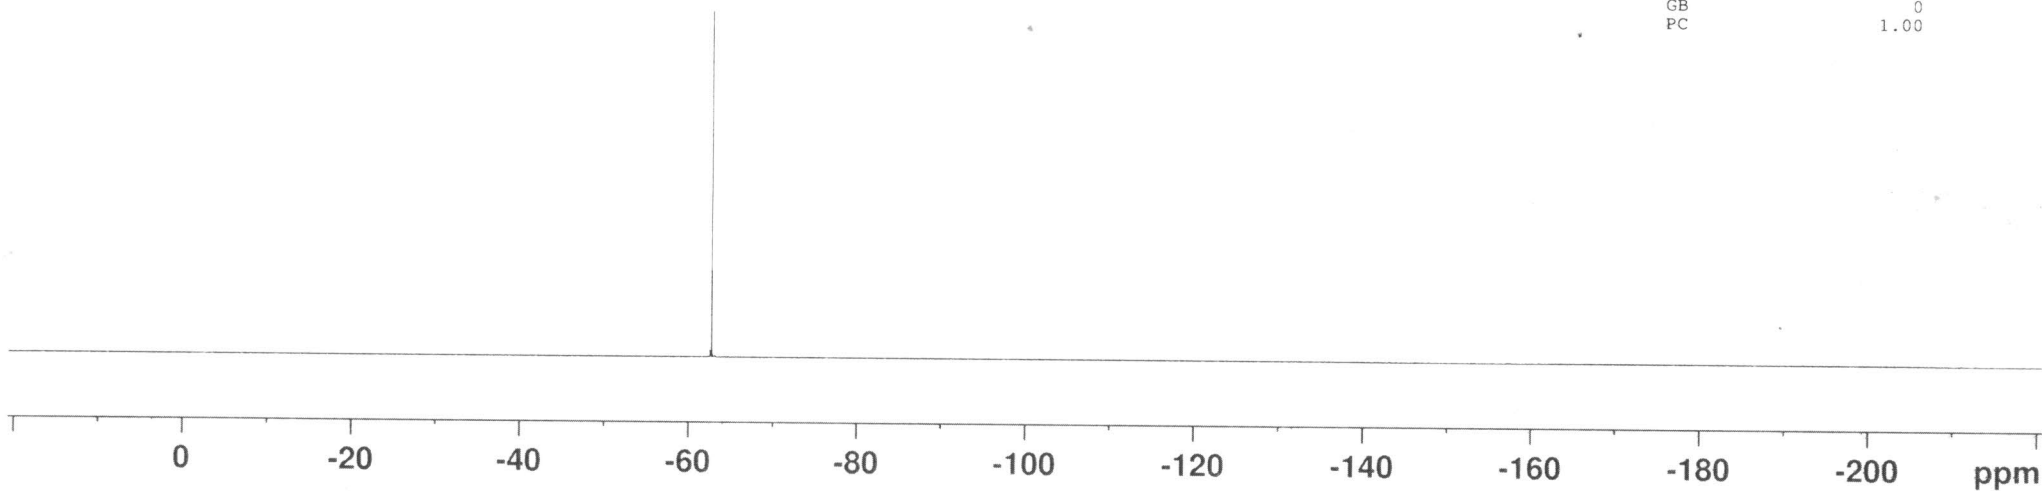

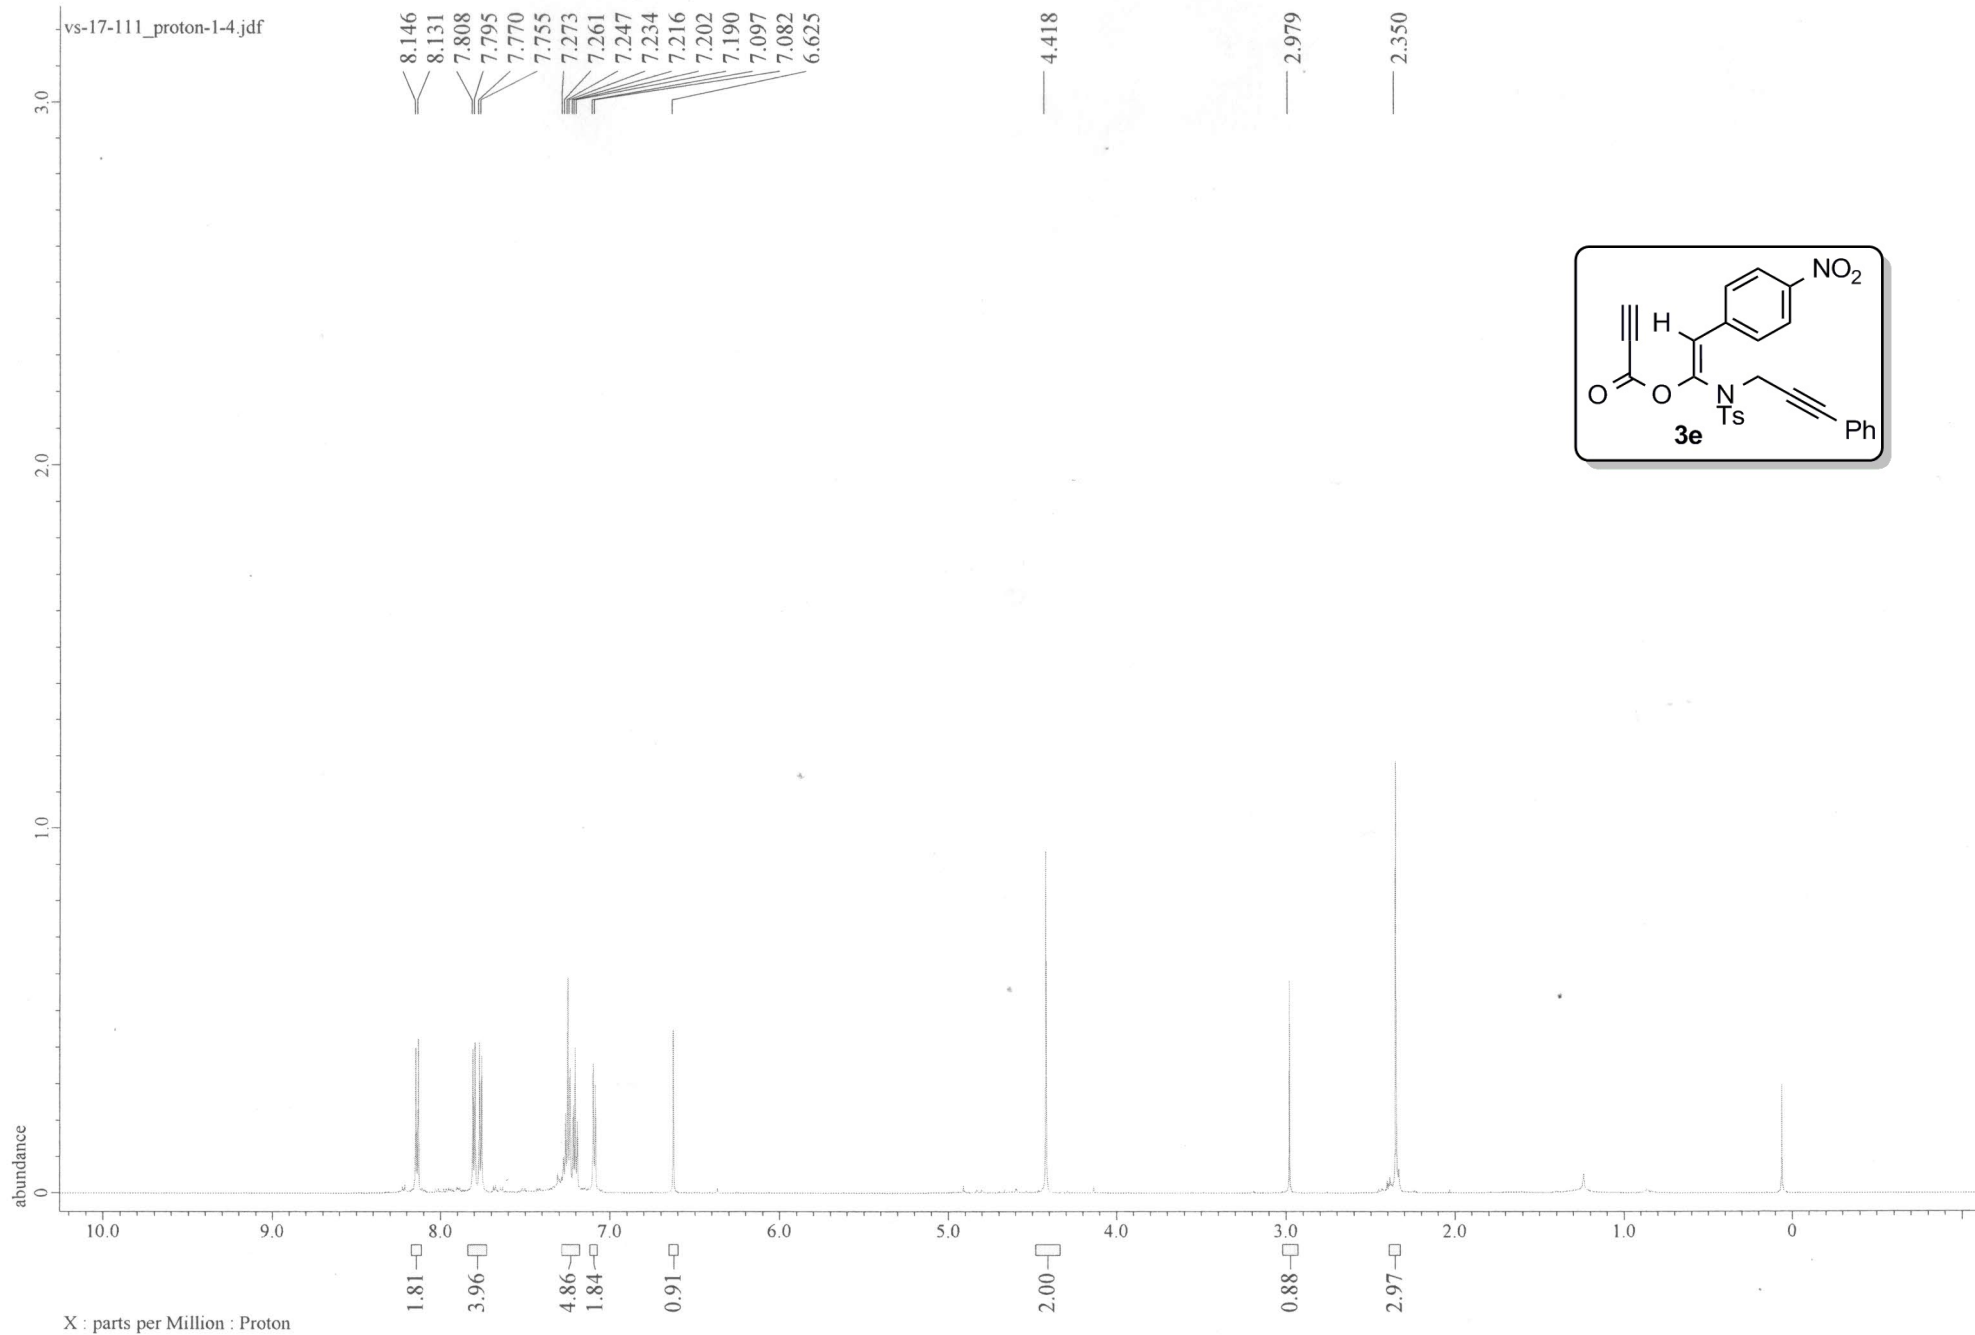

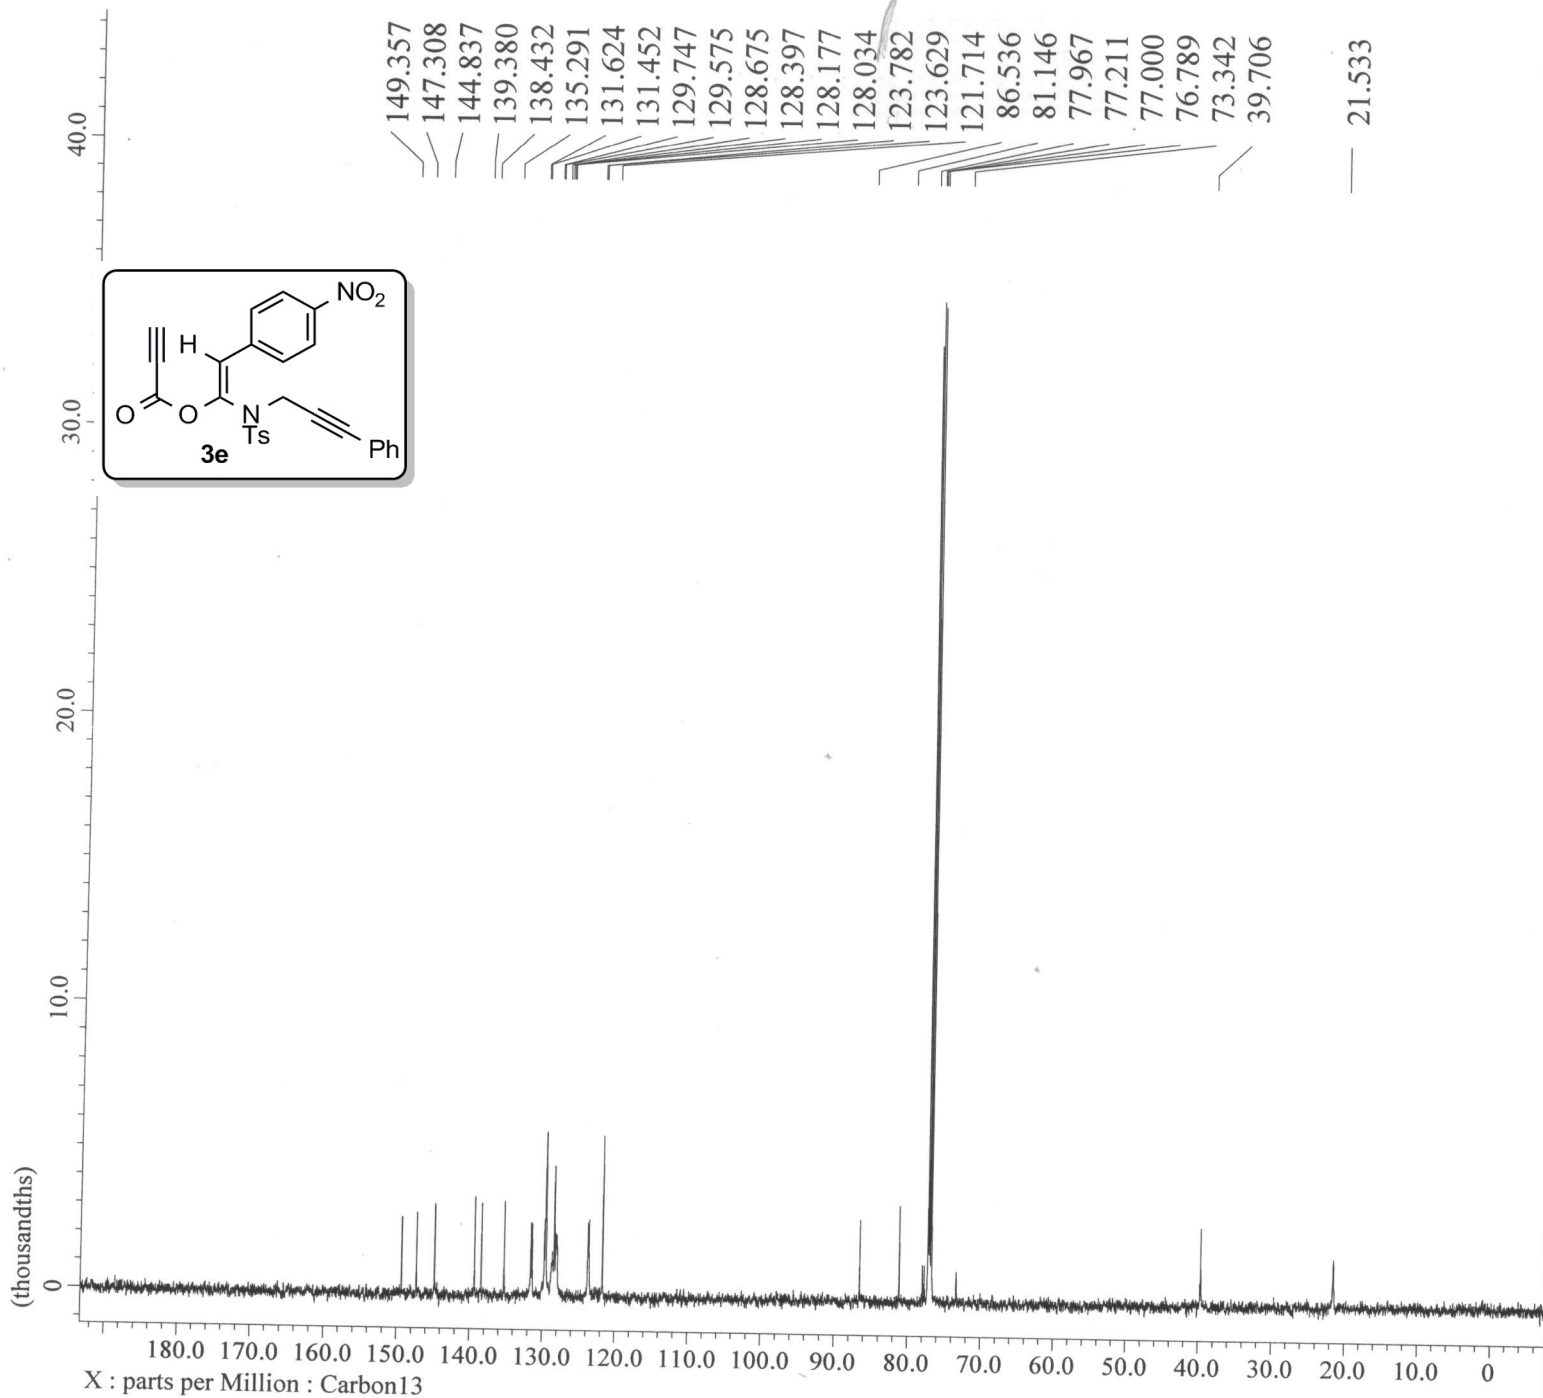

```

Filename           = VS-17-111_Carbon-1
Author            = delta
Experiment        = carbon auto.jxp
Sample_Id         = VS-17-111
Solvent           = CHLOROFORM-D
Actual_Start_Time = 25-JAN-2021 12:27:
Revision_Time     = 15-AUG-2021 17:21:

Comment           = single pulse decou
Data_Format       = 1D COMPLEX
Dim_Size          = 26214
X_Domain          = Carbon13
Dim_Title         = Carbon13
Dim_Units         = [ppm]
Dimensions        = X
Site              = ACRHEM_UOH
Spectrometer      = JNM-ECZ600R/MI

Field_Strength    = 14.09636928[T] (60
X_Acq_Duration    = 0.34603008[s]
X_Domain          = Carbon13
X_Freq            = 150.91343039[MHz]
X_Offset          = 100[ppm]
X_Points          = 16384
X_Prescans        = 4
X_Resolution      = 2.88992217[Hz]
X_Sweep           = 47.34848485[kHz]
X_Sweep_Clipped   = 37.87878788[kHz]
Irr_Domain        = Proton
Irr_Freq          = 600.1723046[MHz]
Irr_Offset        = 5[ppm]
Blanking          = 2[us]
Clipped           = FALSE
Scans             = 357
Total_Scans       = 357

Relaxation_Delay   = 2[s]
Recvr_Gain         = 56
Temp_Get           = 19.8[dC]
X_90_Width        = 11[us]
X_Acq_Time         = 0.34603008[s]
X_Angle           = 30[deg]
X_Atn              = 10.3[dB]
X_Pulse           = 3.66666667[us]
Irr_Atn_Dec       = 33.452[dB]
Irr_Atn_Dec_Calc  = 33.452[dB]
Irr_Atn_Dec_Default_Calc = 33.452[dB]
Irr_Atn_Noise     = 33.452[dB]
Irr_Dec_Bandwidth_Hz = 7.23684211[kHz]
Irr_Dec_Bandwidth_Ppm = 12.05794078[ppm]
Irr_Dec_Freq      = 600.1723046[MHz]
Irr_Dec_Merit_Factor = 2.2
Irr_Decoupling    = TRUE
Irr_Noise         = TRUE
Irr_Noise         = WALTZ
Irr_Offset_Default = 5[ppm]
Irr_Pwidth        = 76[us]
Irr_Pwidth_Default = 76[us]
Irr_Pwidth_Default_Calc = 76[us]
Irr_Pwidth_Temp1  = 76[us]
Irr_Wurst         = FALSE
Decimation_Rate   = 0
Experiment_Path    = c:\Program Files\J
Initial_Wait      = 1[s]
Noe_Time          = 2[s]
Noe_Time_Flag     = FALSE
Relaxation_Delay_Calc = 0[s]
Relaxation_Delay_Temp = 2[s]

```

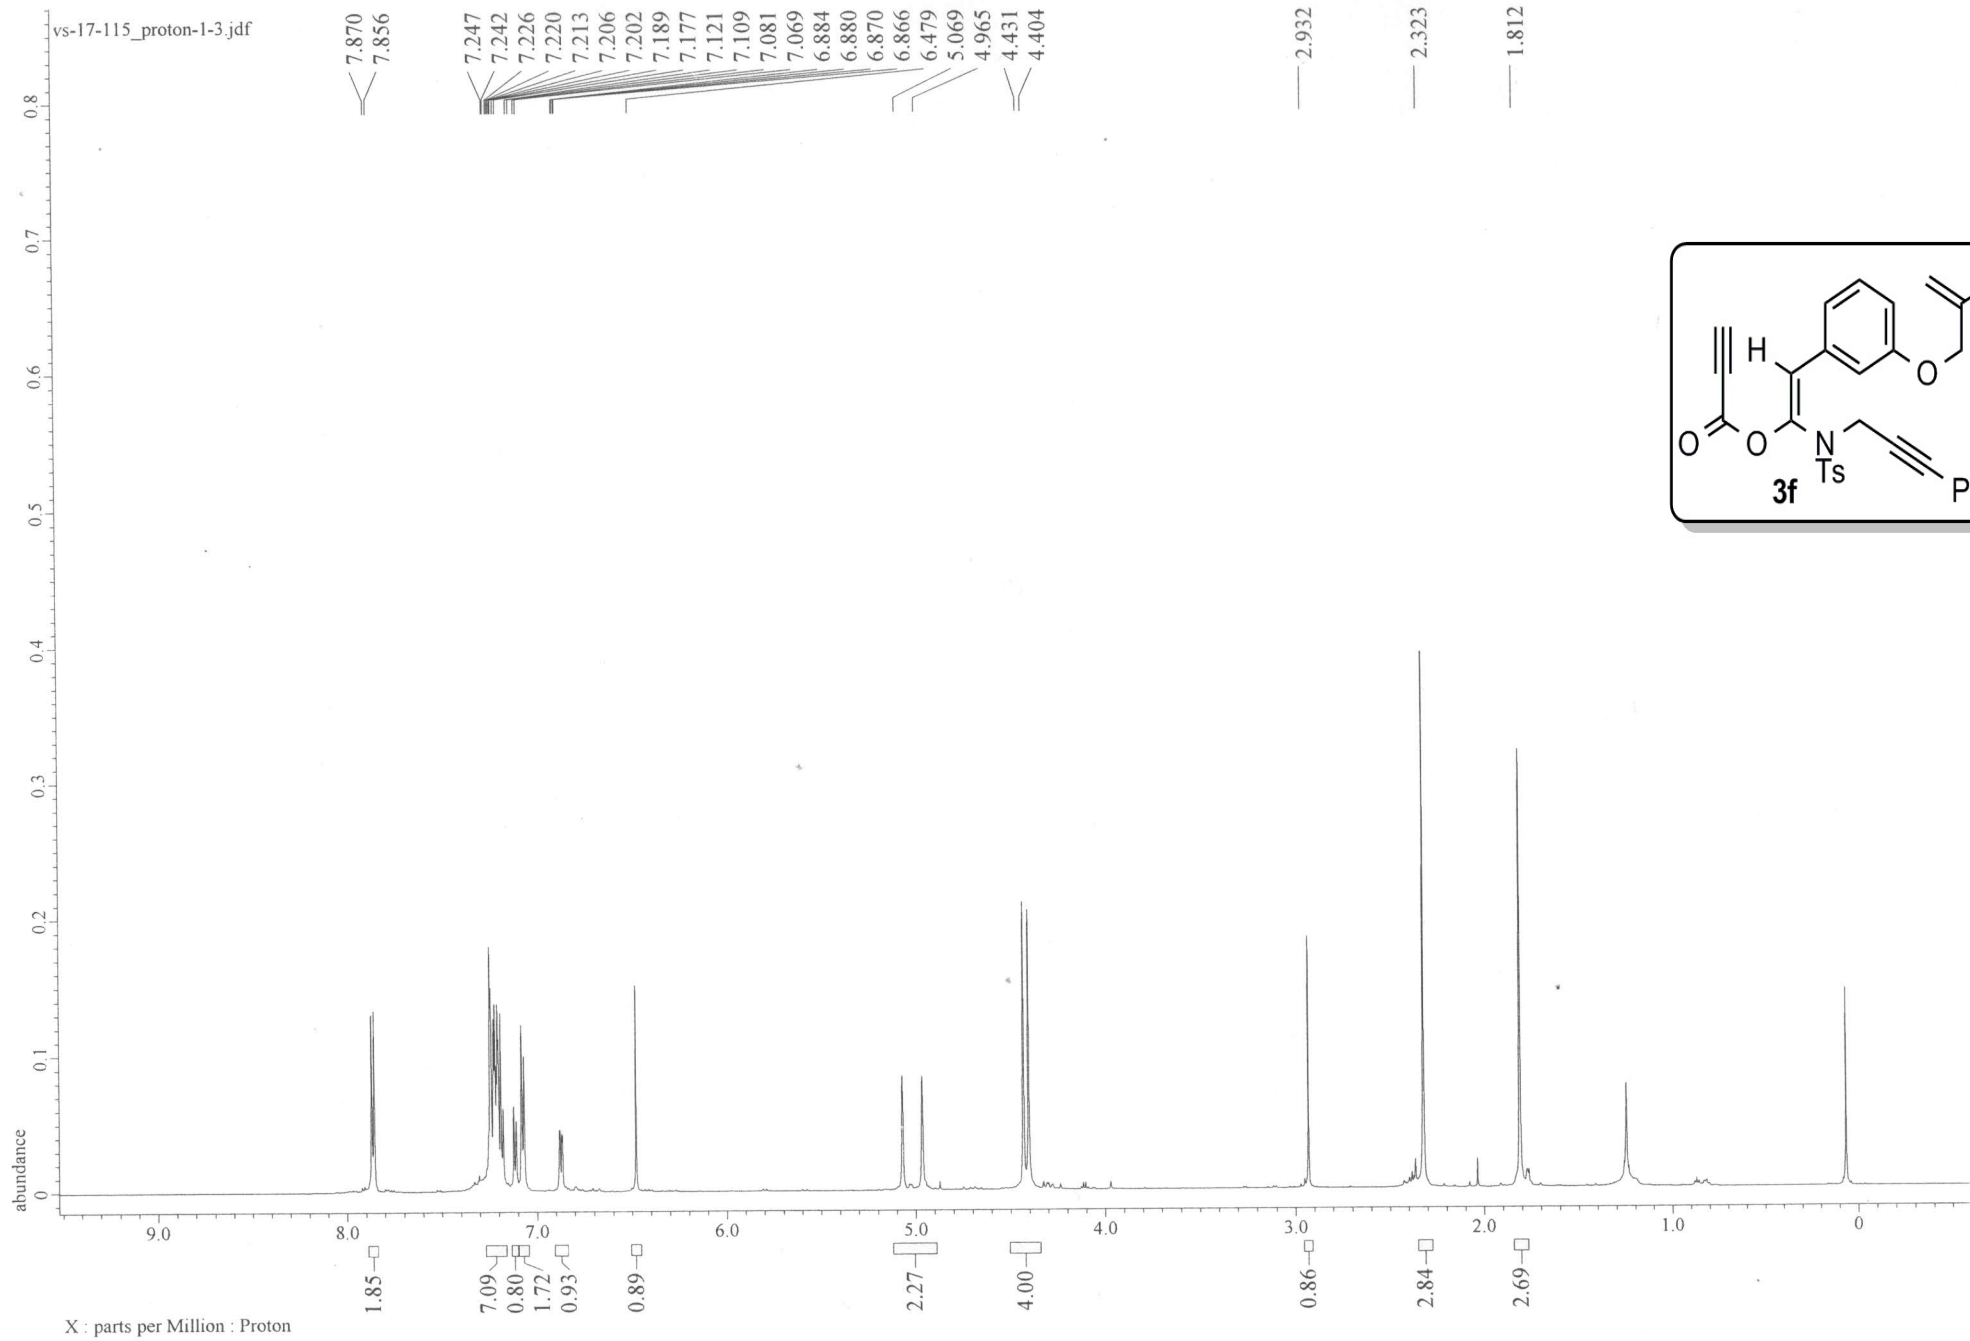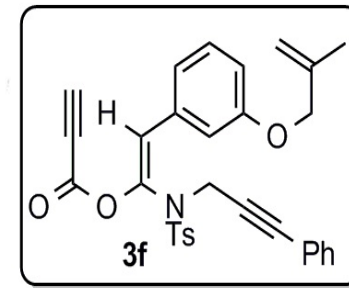

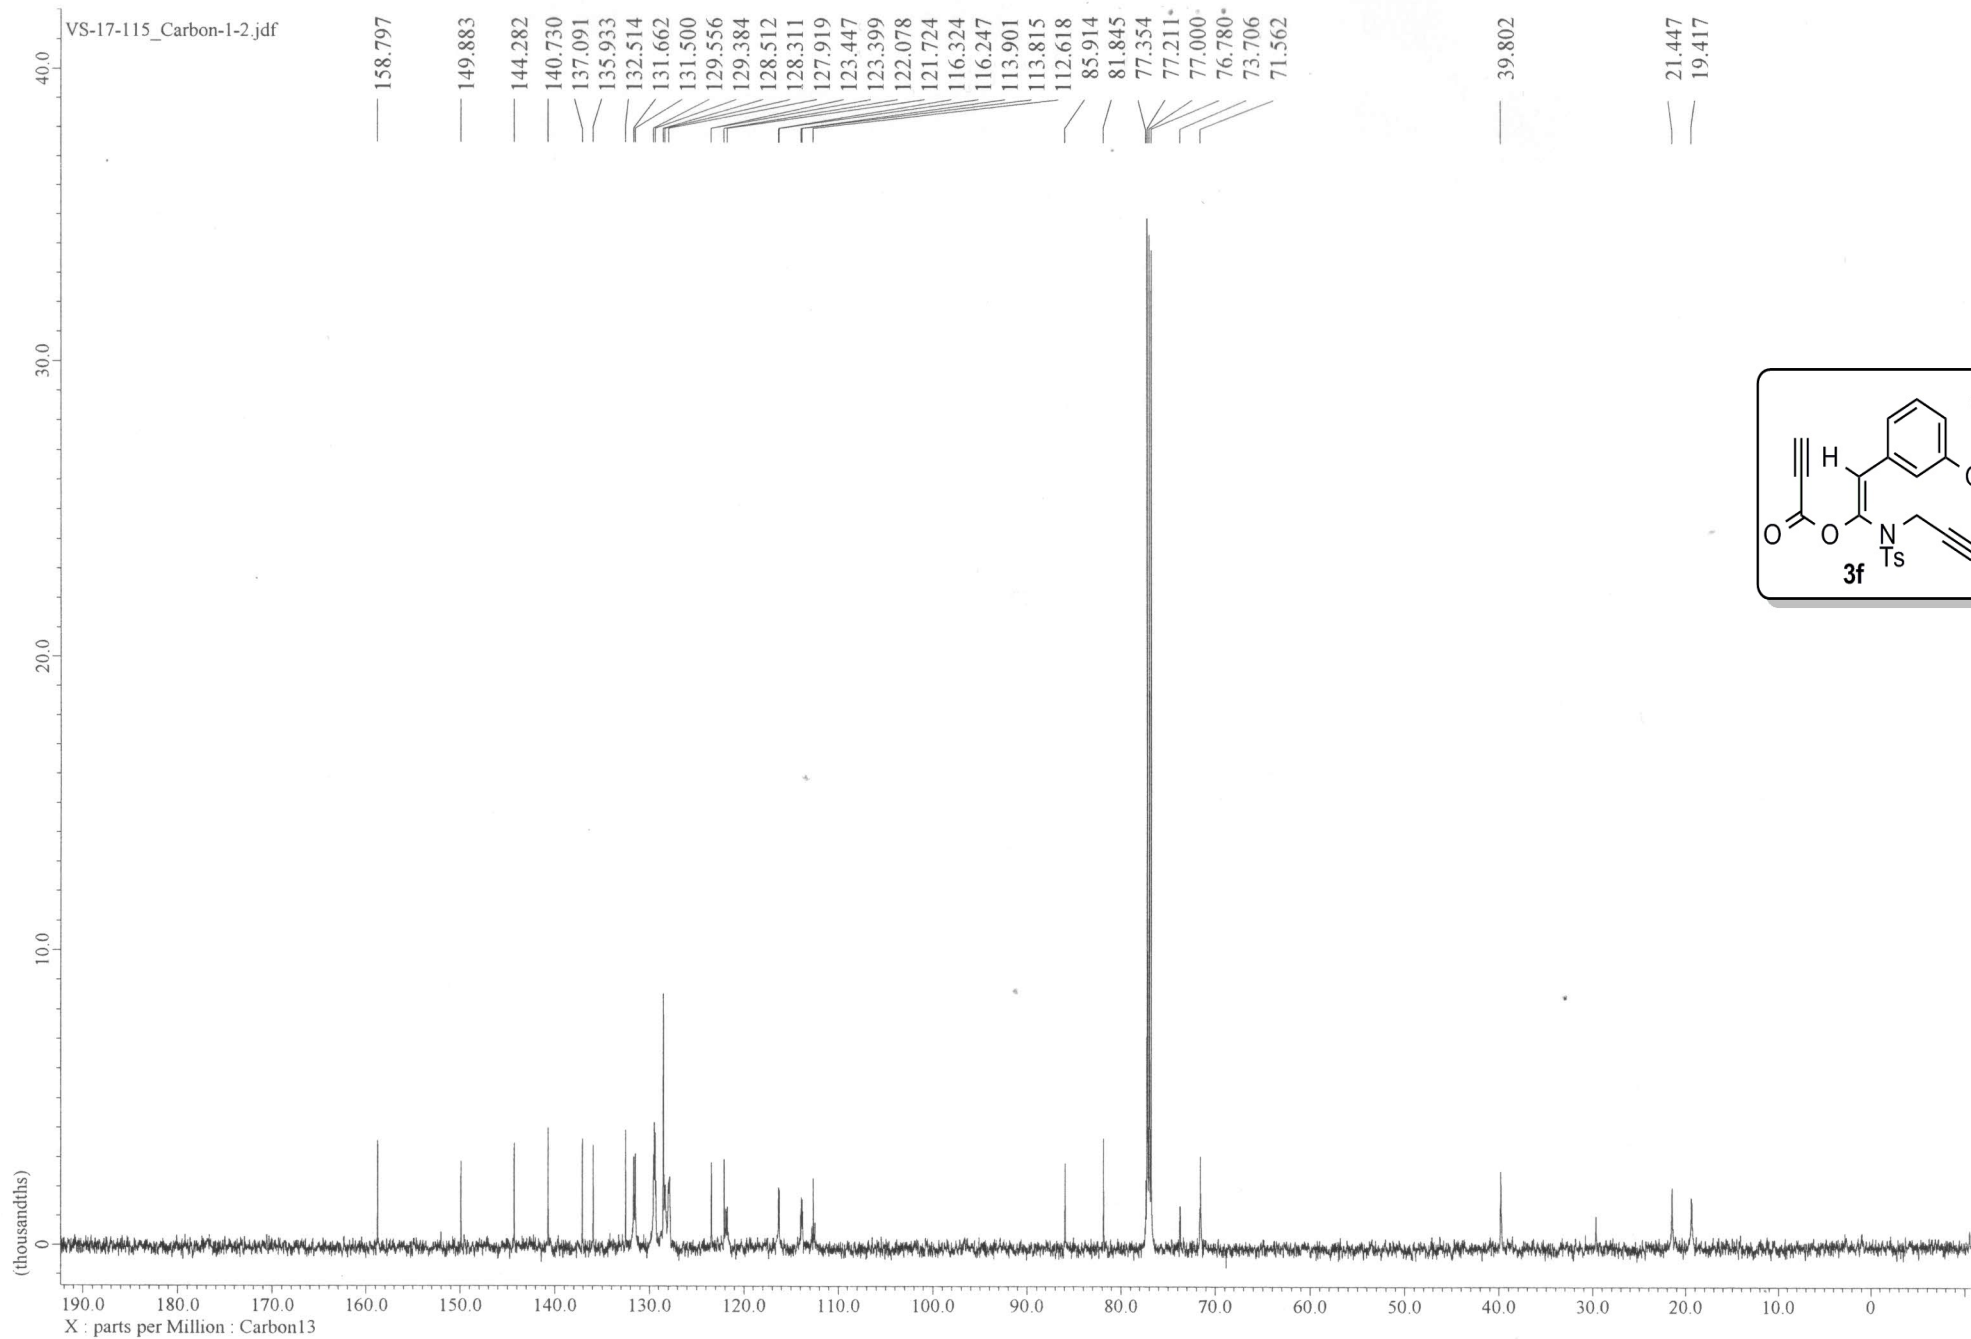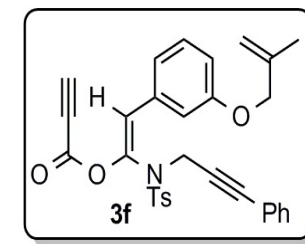

16-82

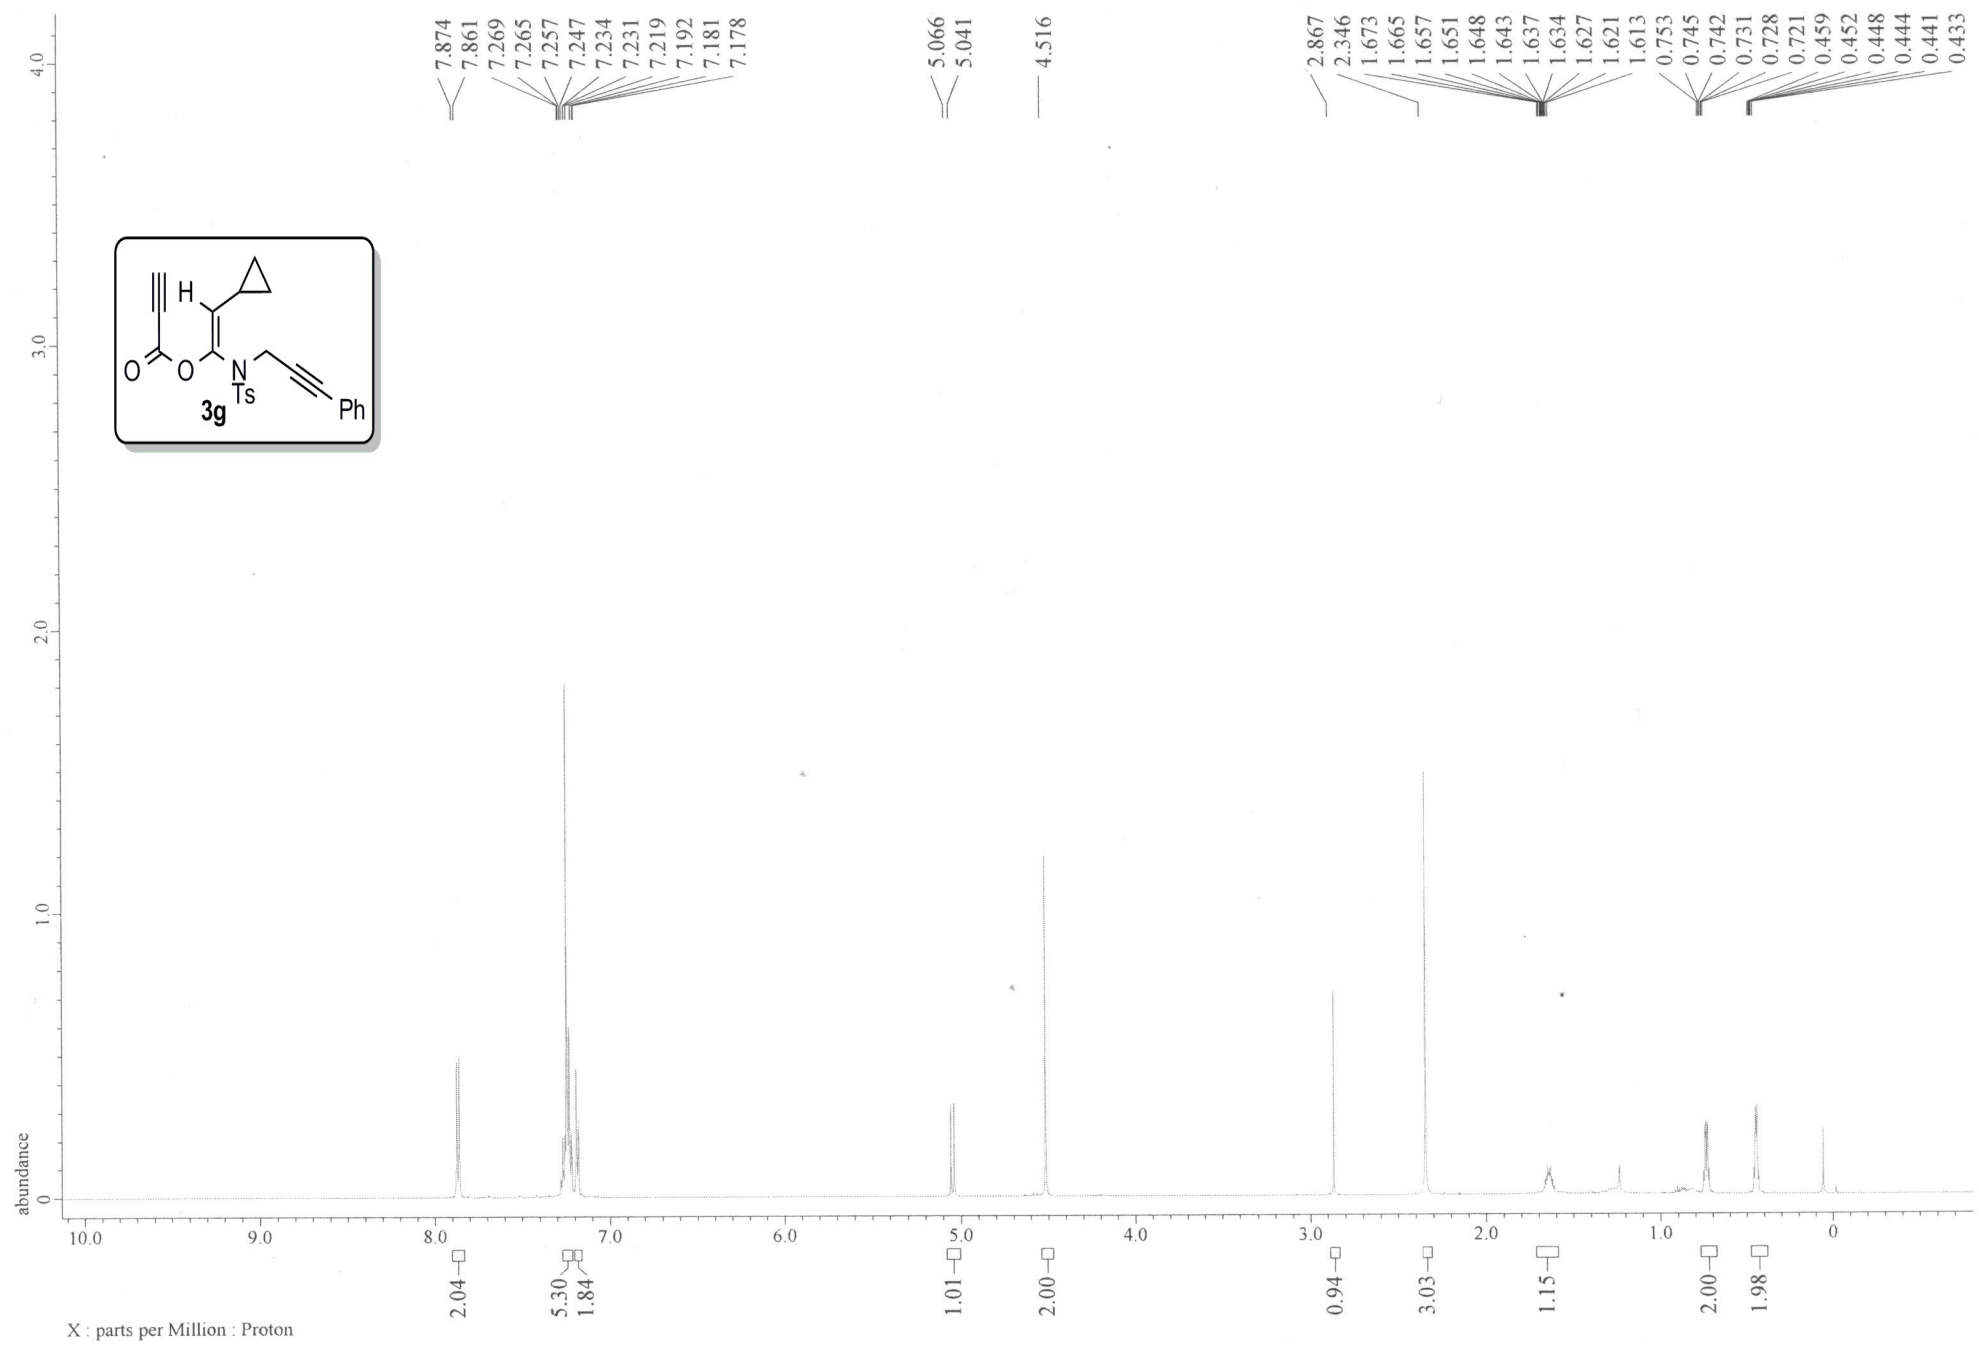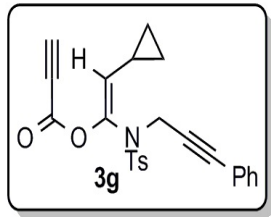



150.525  
144.014  
136.450  
136.028  
131.605  
130.753  
130.638  
129.451  
129.393  
128.321  
128.043  
122.375

85.445  
82.793  
77.211  
77.000  
76.789  
76.703  
73.859

40.329

21.486

9.642  
9.613  
7.248

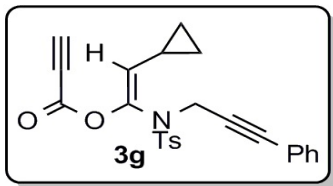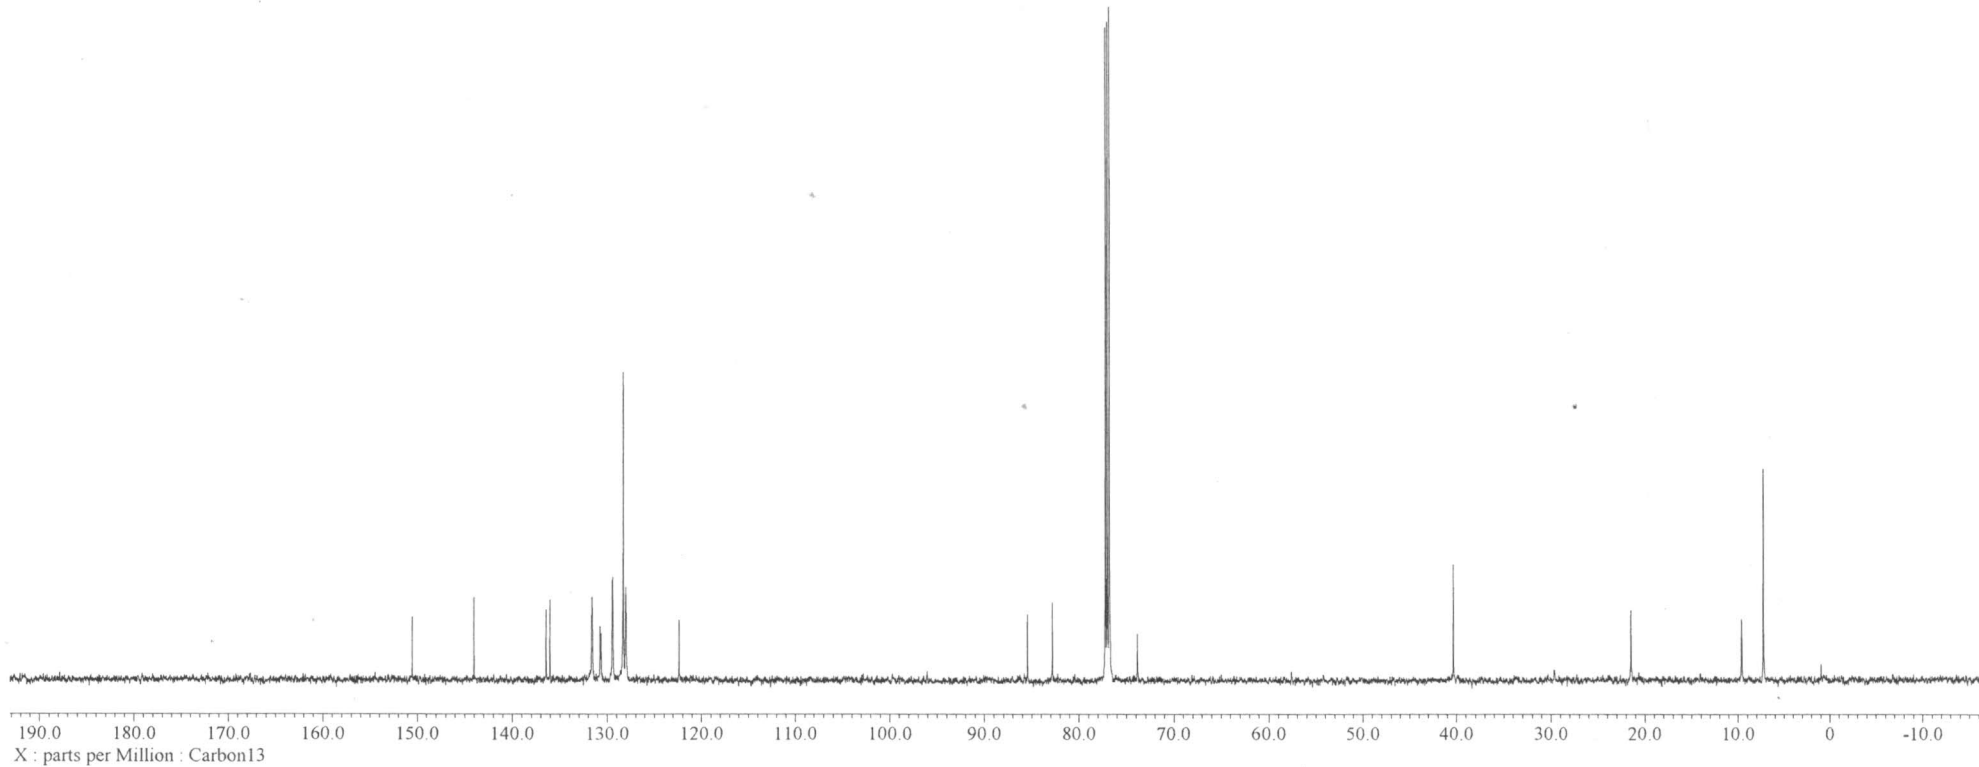

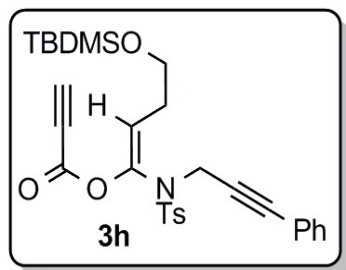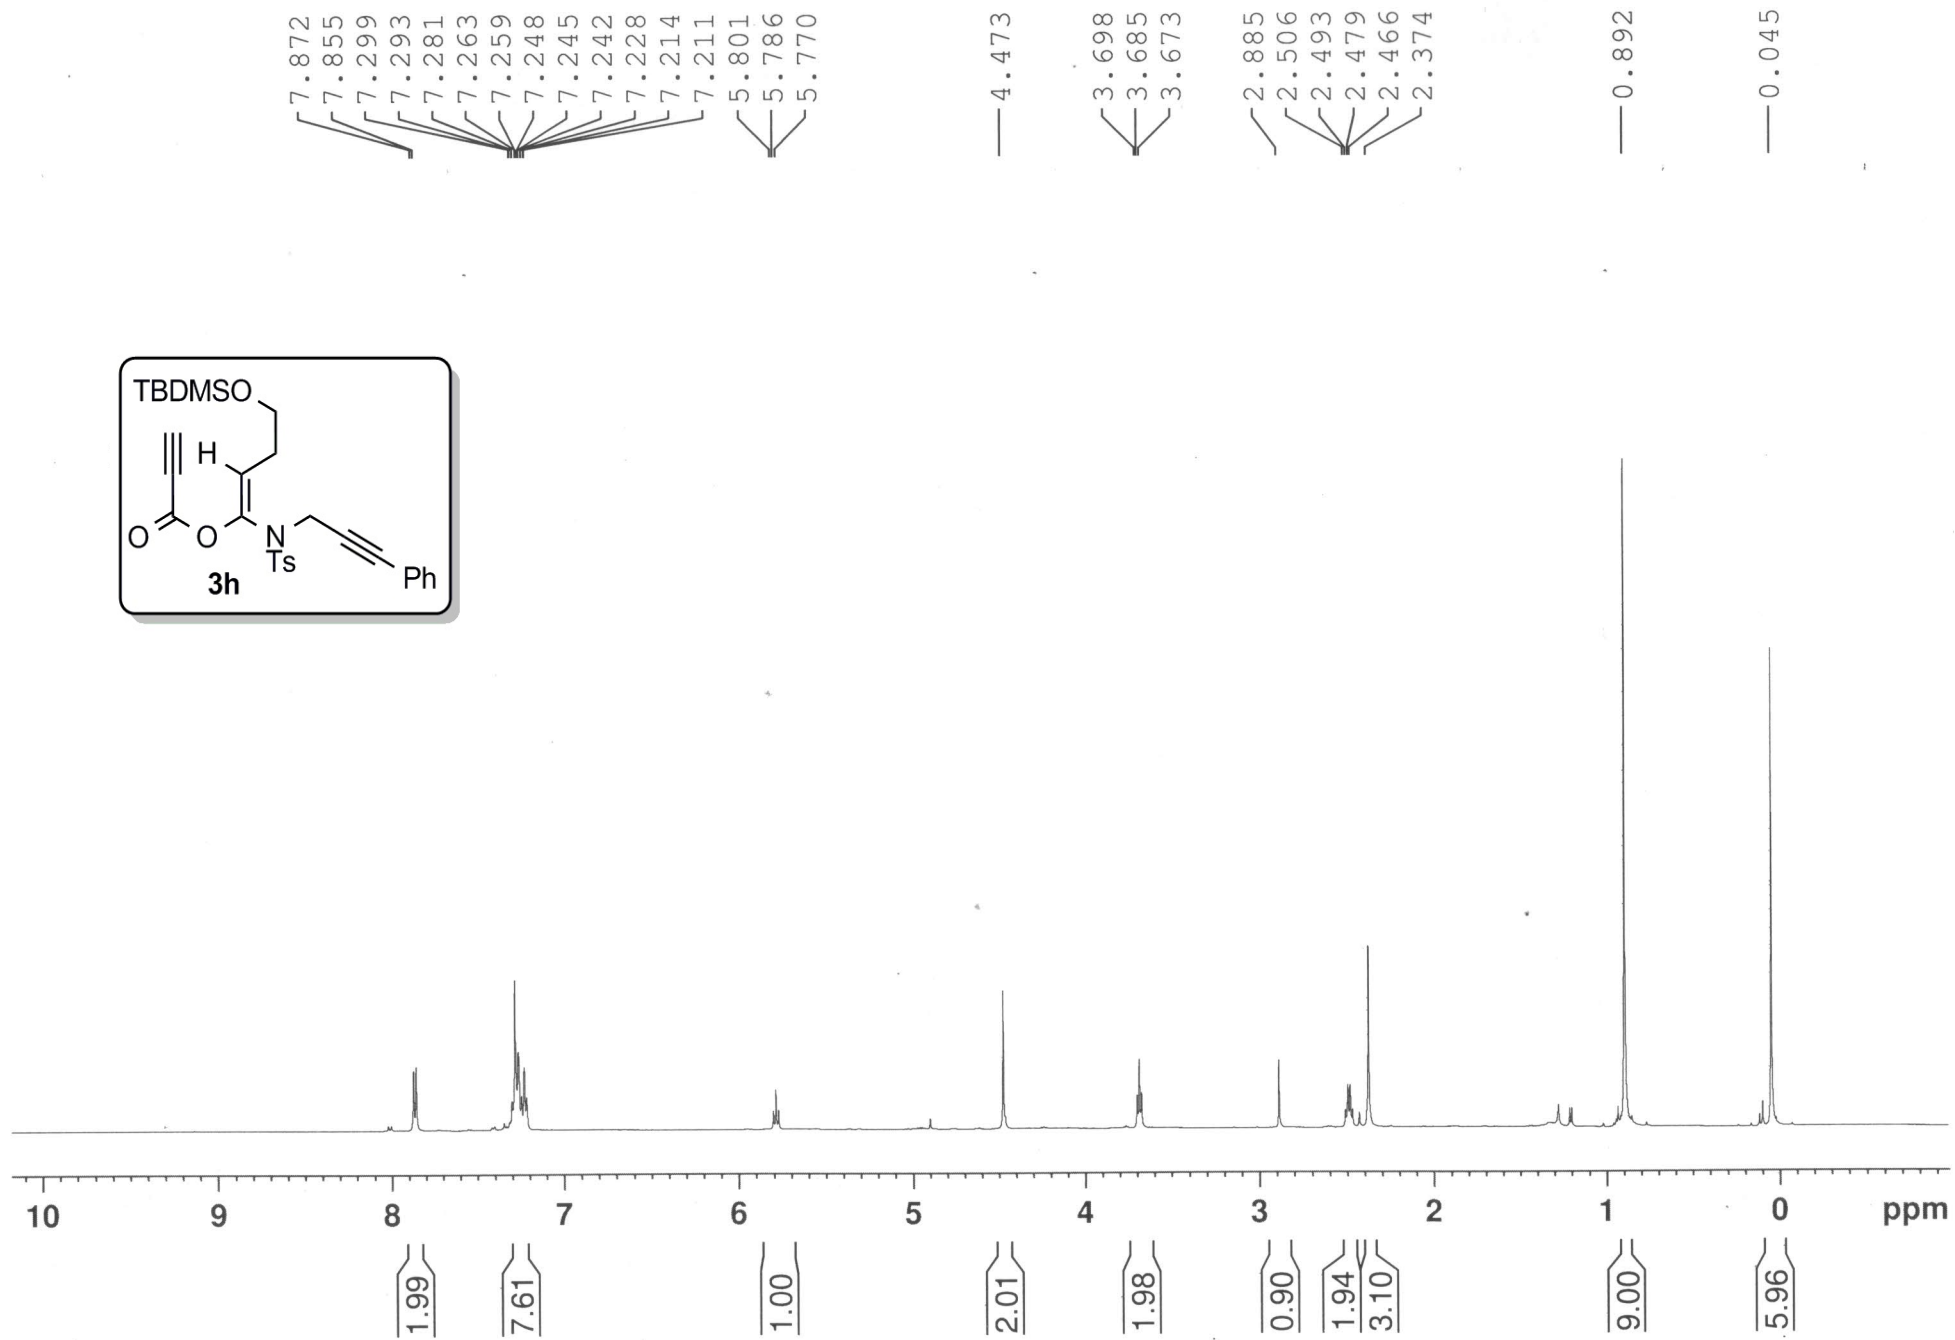

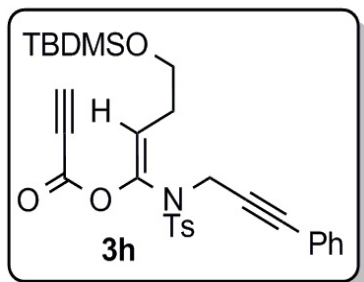

150.10  
144.10  
137.72  
136.21  
131.63  
129.46  
128.38  
128.26  
128.01  
123.25  
122.27

85.50  
82.46  
77.26  
77.00  
76.75  
73.79

61.67

40.26

30.95

25.86

21.46

18.24

5.47

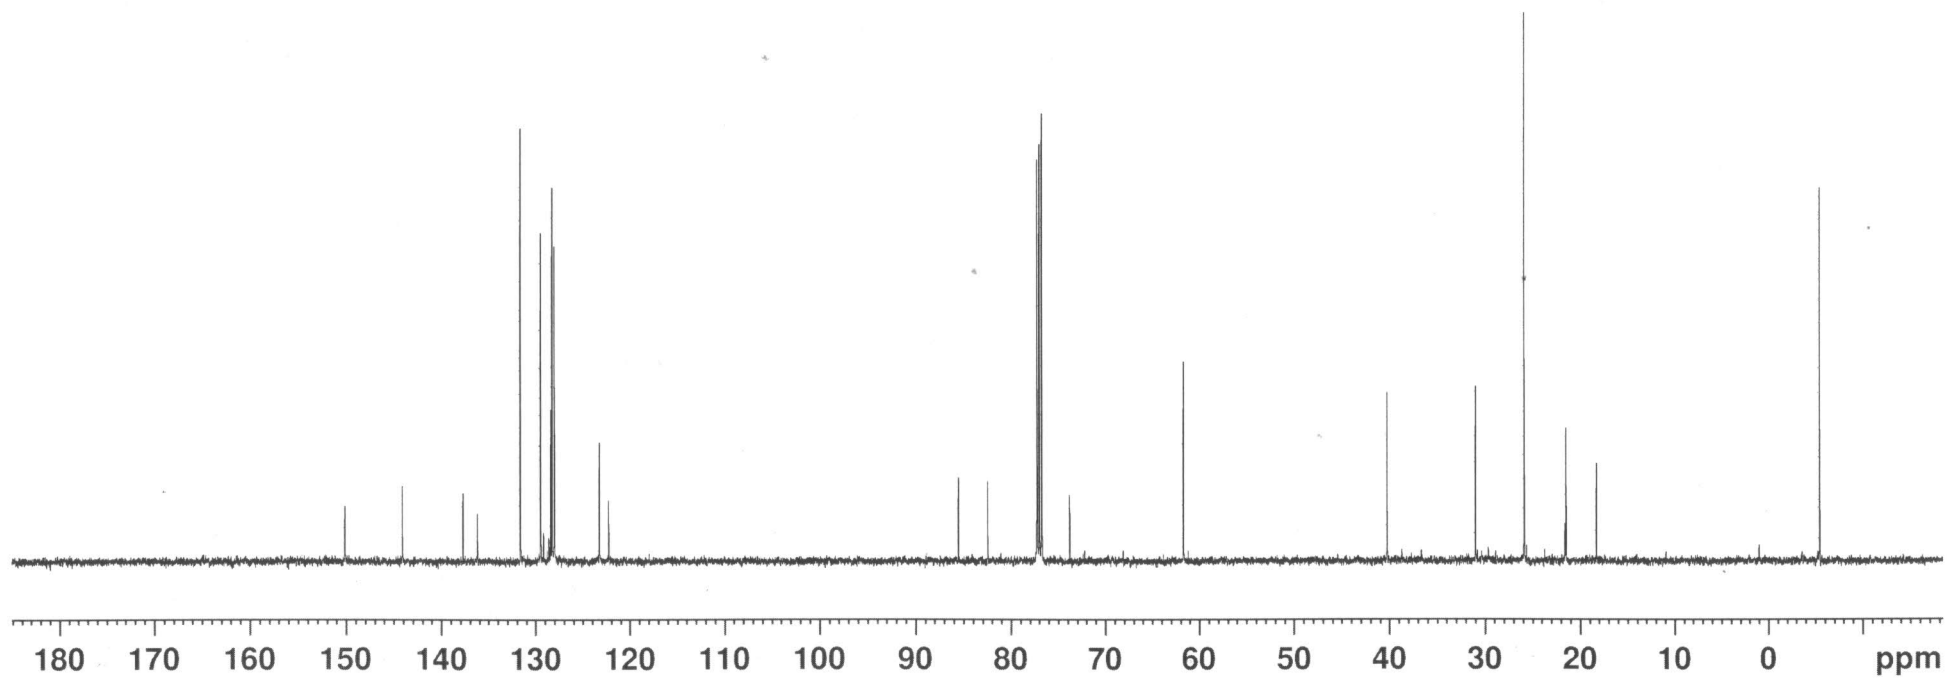

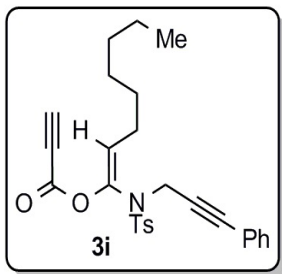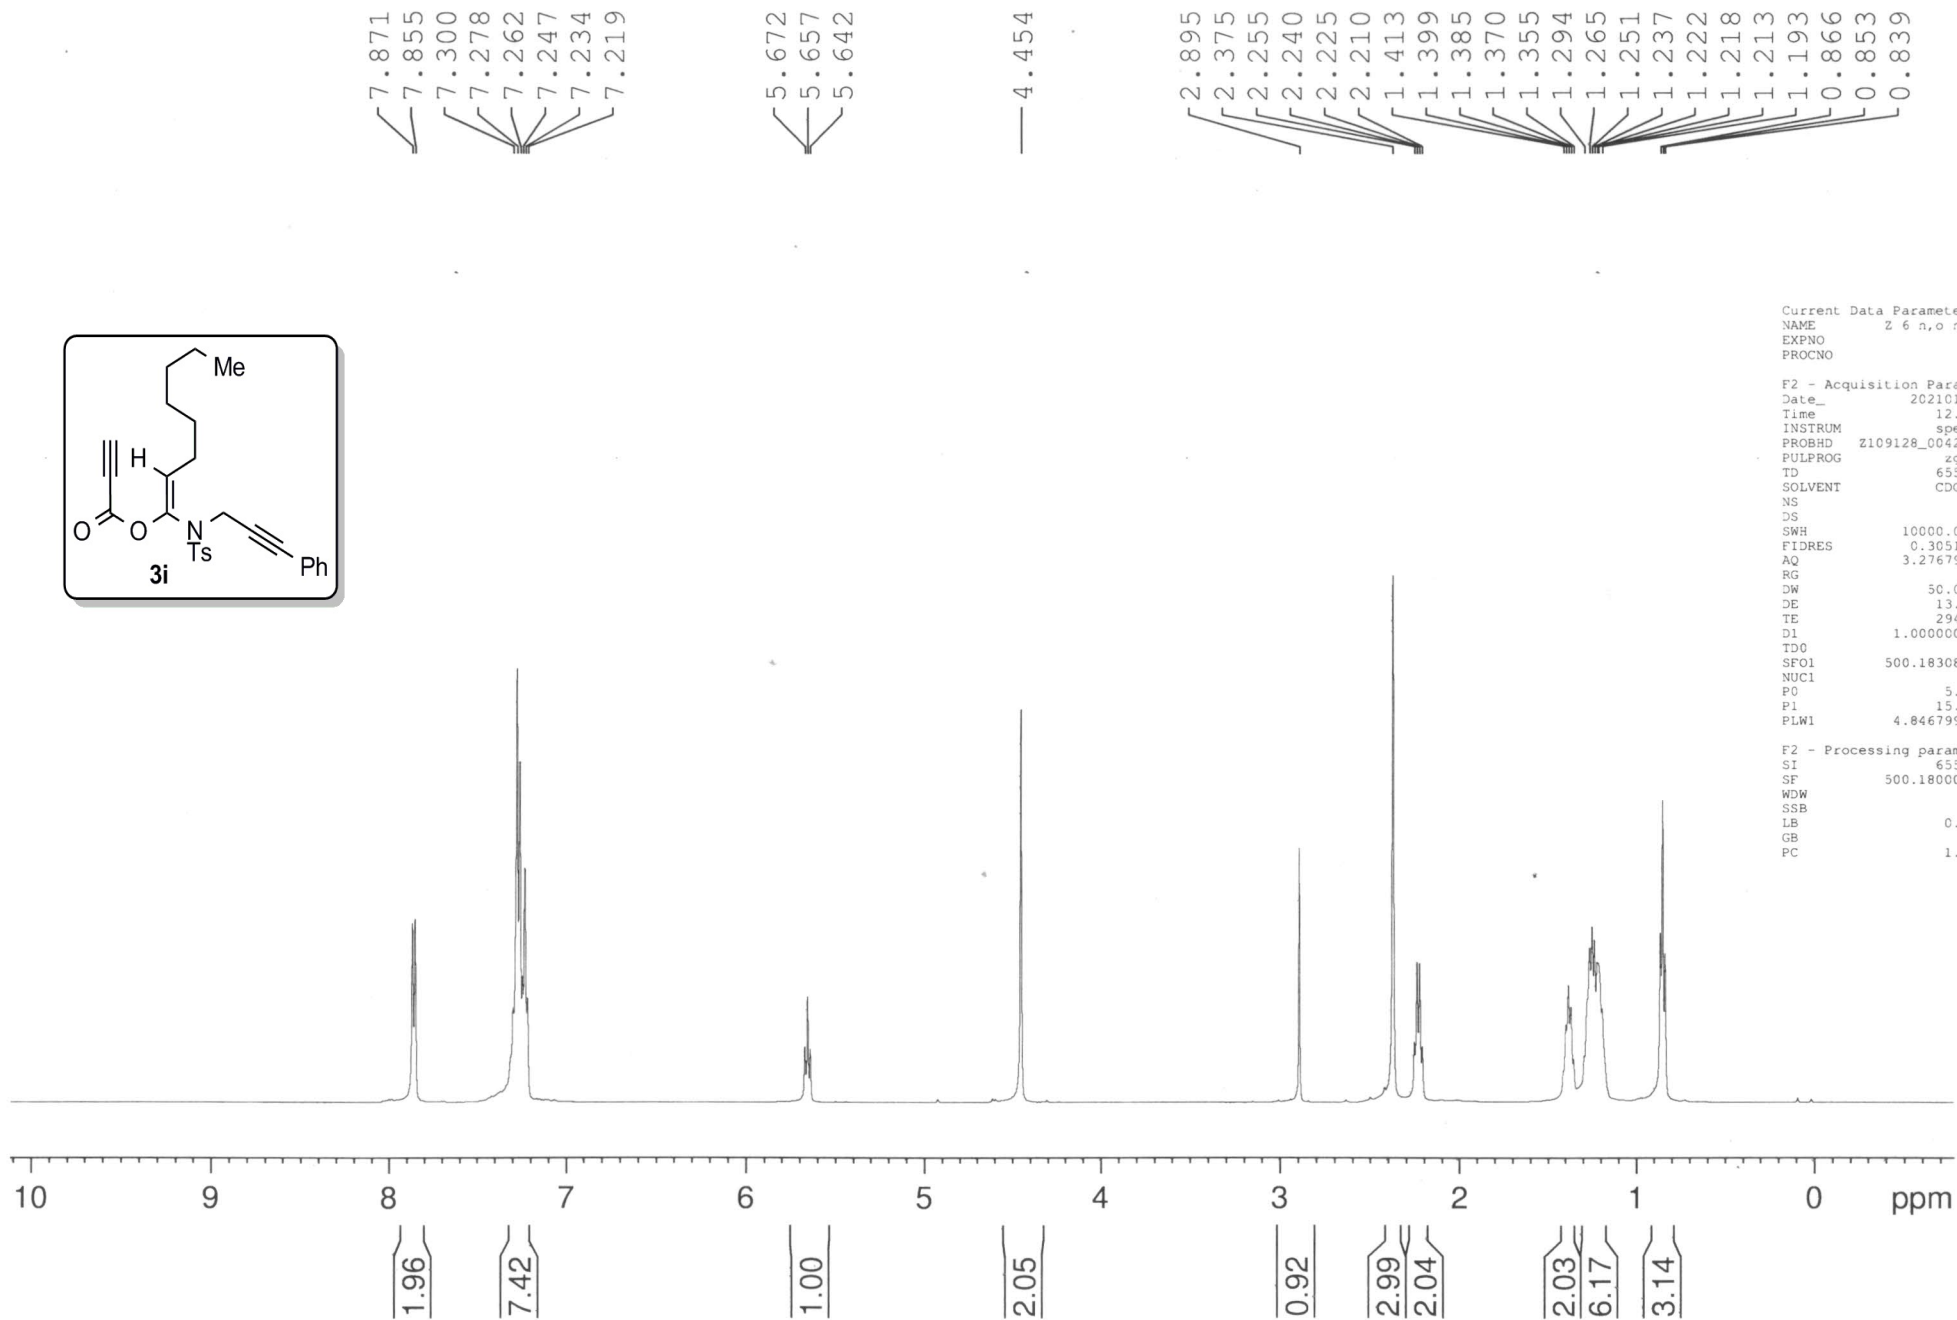

Current Data Parameters  
 NAME Z 6 n.o nmr  
 EXPNO 13  
 PROCNO 1

F2 - Acquisition Parameters  
 Date\_ 20210118  
 Time 12.25 h  
 INSTRUM spect  
 PROBHD Z109128\_0042 ( )  
 PULPROG zg30  
 TD 65536  
 SOLVENT CDCl3  
 NS 16  
 DS 2  
 SWH 10000.000 Hz  
 FIDRES 0.305176 Hz  
 AQ 3.2767999 sec  
 RG 64  
 DW 50.000 usec  
 DE 13.04 usec  
 TE 294.9 K  
 D1 1.00000000 sec  
 TDO 1  
 SFO1 500.1830886 MHz  
 NUC1 1H  
 P0 5.00 usec  
 P1 15.00 usec  
 PLW1 4.84679985 W

F2 - Processing parameters  
 SI 65536  
 SF 500.1800000 MHz  
 WDW EM  
 SSB 0  
 LB 0.30 Hz  
 GB 0  
 PC 1.00

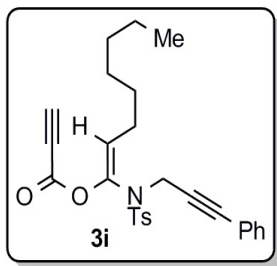

150.37  
144.06  
136.67  
136.24  
131.61  
129.44  
128.38  
128.22  
127.99  
126.59  
122.27

85.41  
82.52  
77.25  
77.20  
77.00  
76.75  
73.81

40.15  
31.50  
28.95  
28.68  
27.23  
22.47  
21.45  
13.98

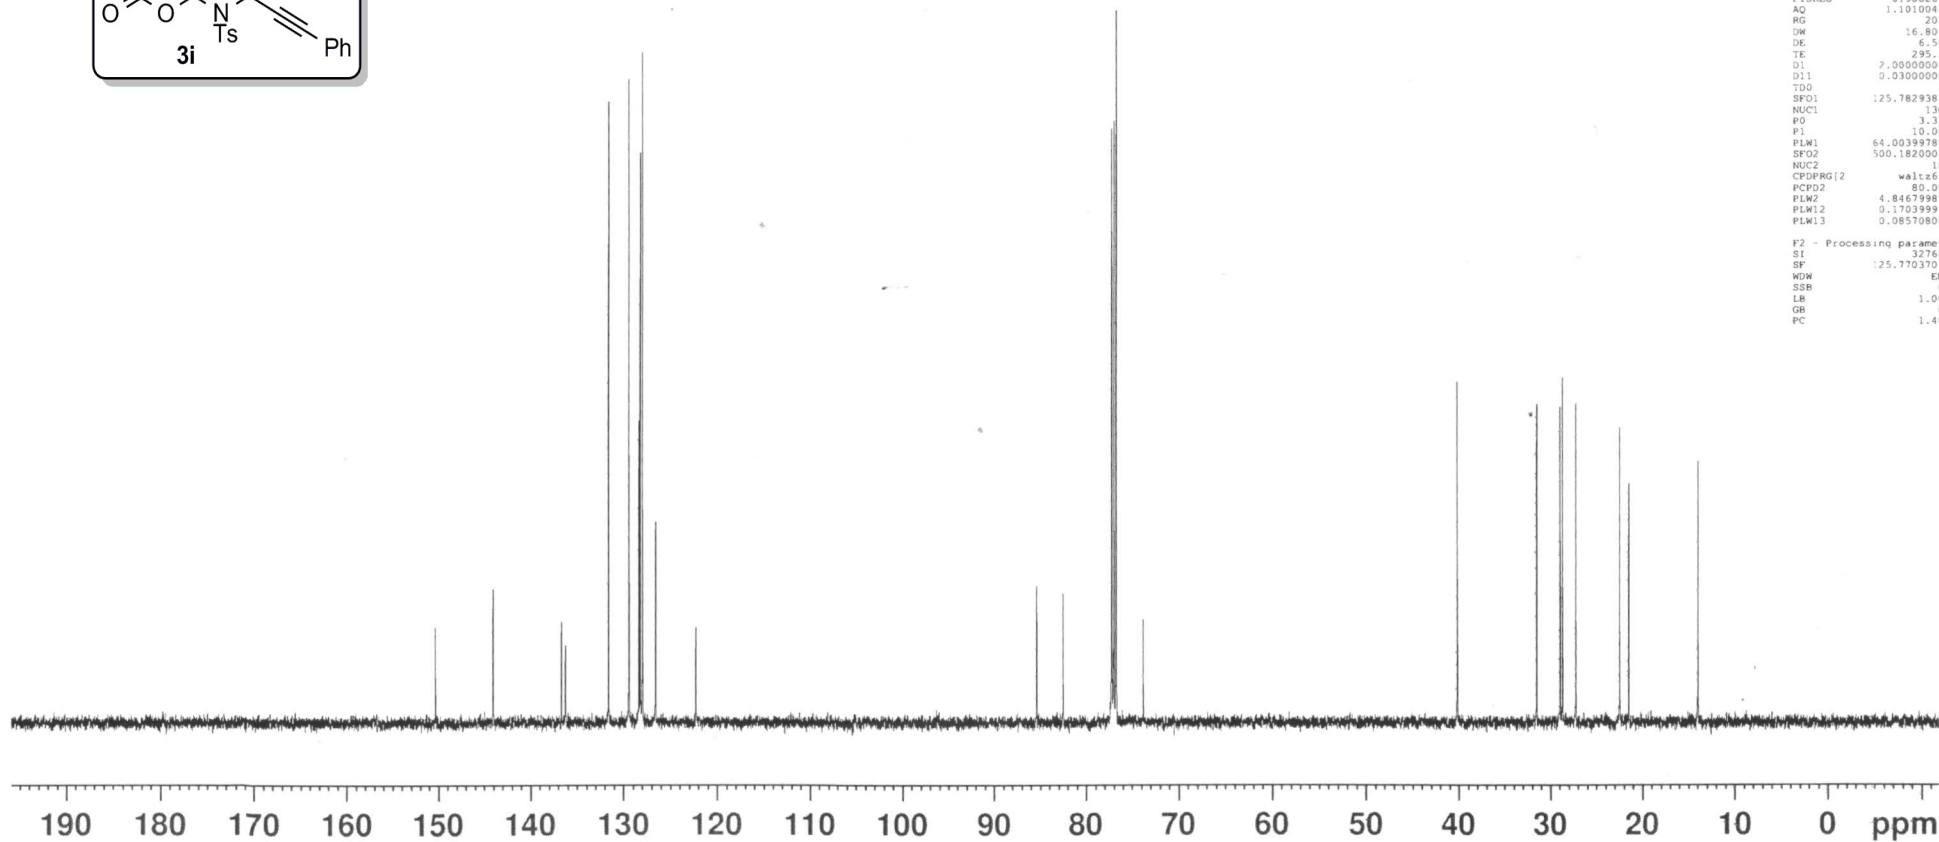

Current Data Parameters  
NAME 2.6 n, 0 mmz  
EXPNO 14  
PROCNO 1

F2 - Acquisition Parameters  
Date\_ 20210118  
Time 12.35 h  
INSTRUM spect  
PROBHD Z199128\_0042 (   
PULPROG zgpg30  
TD 65536  
SOLVENT CDCl3  
NS 138  
DS 4  
SWH 29761.904 Hz  
FIDRES 0.908261 Hz  
AQ 1.1010048 sec  
RG 203  
DW 16.800 usec  
DE 6.50 usec  
TE 295.3 K  
D1 2.0000000 sec  
D11 0.03000000 sec  
TDO 1  
SFO1 125.7829381 MHz  
NUC1 13C  
P0 3.33 usec  
P1 10.00 usec  
PLW1 64.00399780 W  
SFO2 500.1820007 MHz  
NUC2 1H  
CPDPRG2 waltz65  
PCPD2 80.00 usec  
PLW2 4.84679985 W  
PLW12 0.17039999 W  
PLW13 0.08570800 W

F2 - Processing parameters  
SI 32768  
SF 125.7703703 MHz  
WDW EM  
SSB 0  
LB 1.00 Hz  
GB 0  
PC 1.40

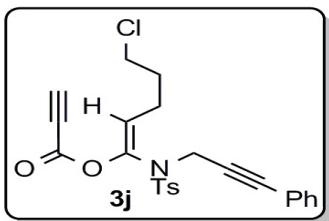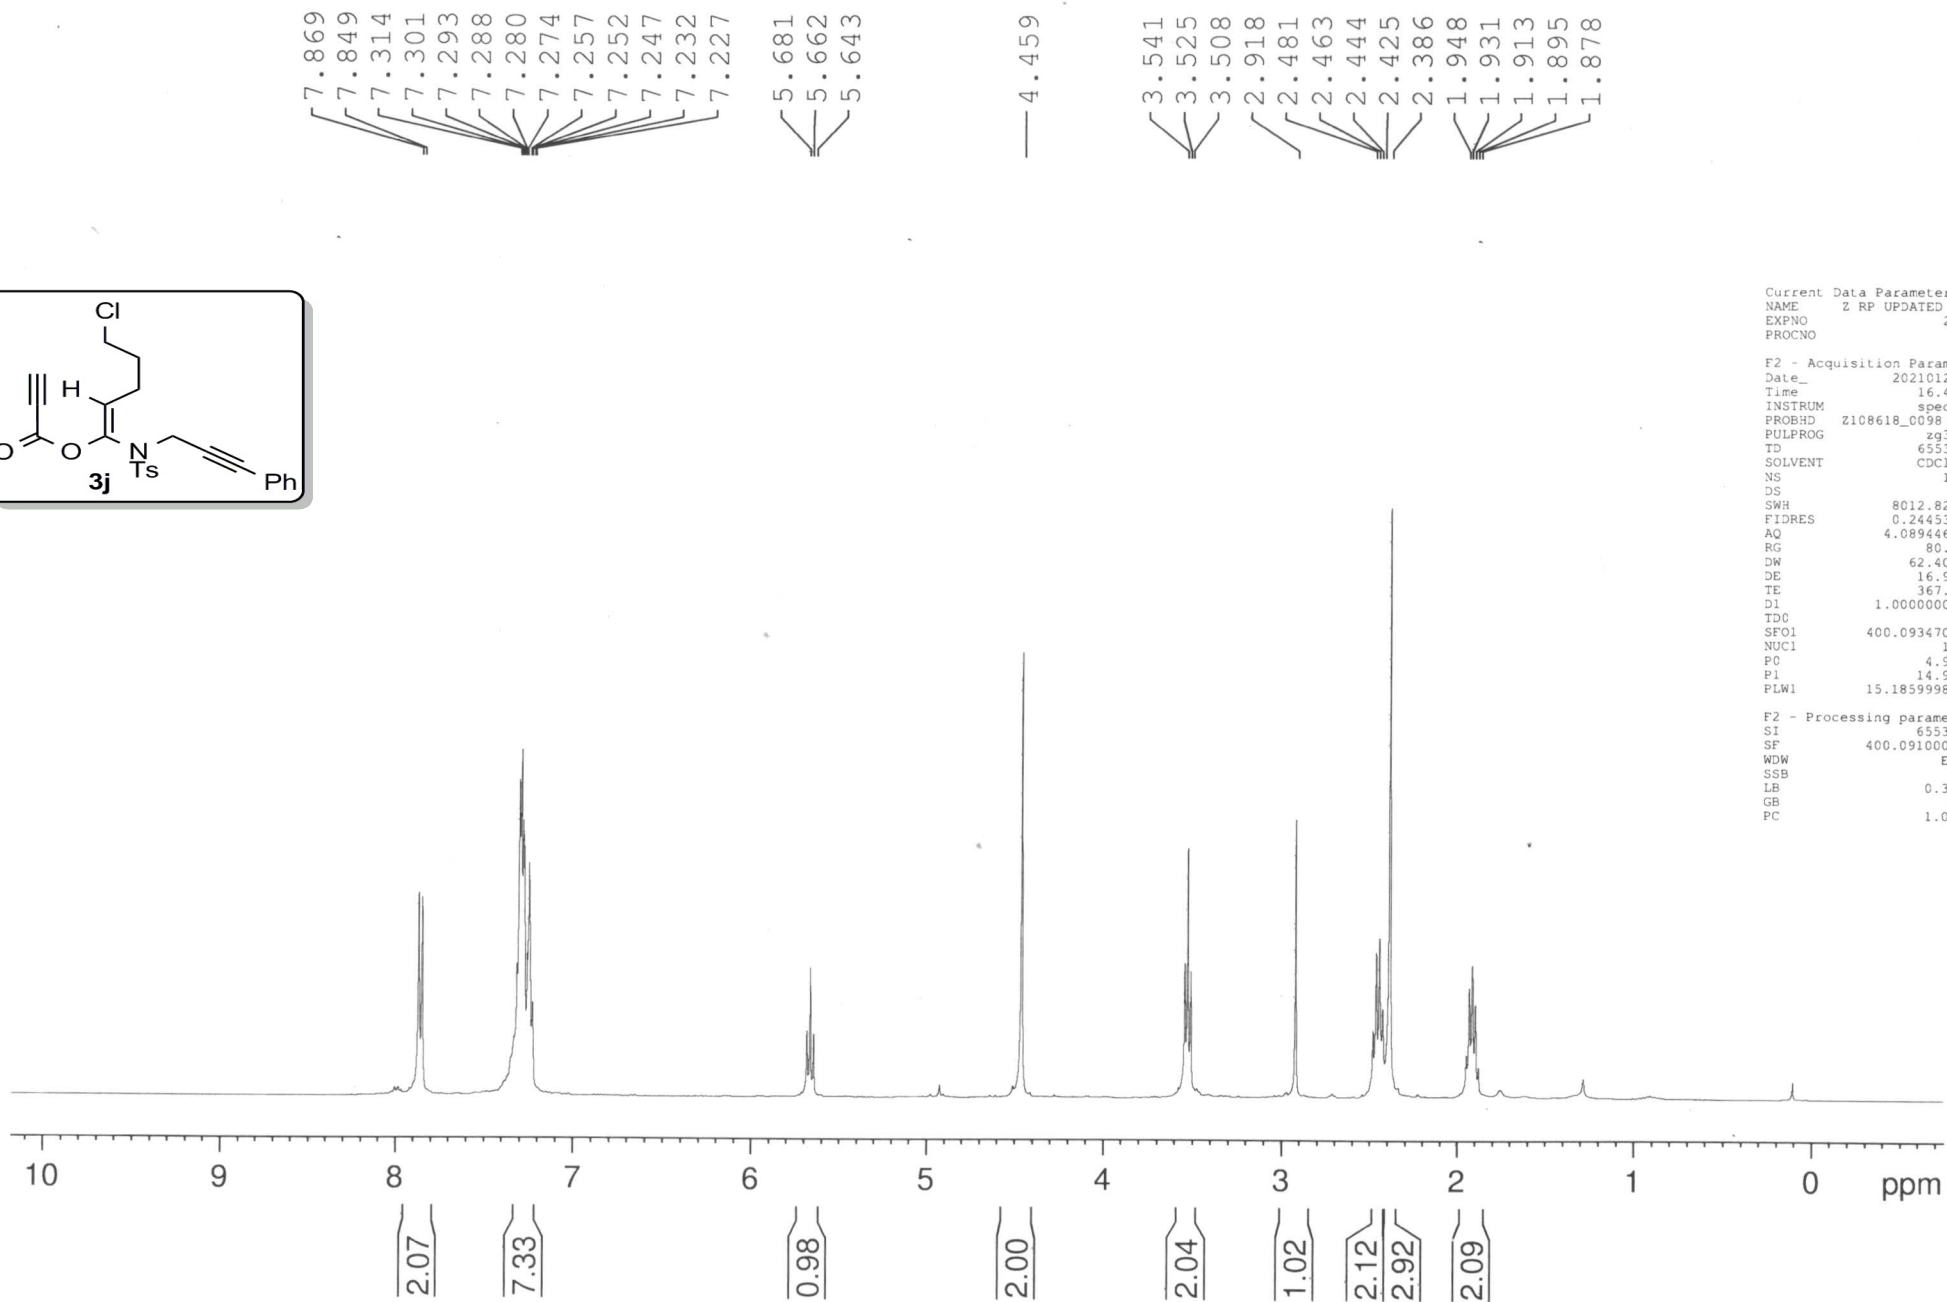

Current Data Parameters  
 NAME Z RP UPDATED 400  
 EXPNO 29  
 PROCNO 1

F2 - Acquisition Parameters  
 Date\_ 20210122  
 Time 16.43 h  
 INSTRUM spect  
 PROBHD Z108618\_0098 ( )  
 PULPROG zg30  
 TD 65536  
 SOLVENT CDCl3  
 NS 16  
 DS 2  
 SWH 8012.820 Hz  
 FIDRES 0.244532 Hz  
 AQ 4.0894465 sec  
 RG 80.6  
 DW 62.400 usec  
 DE 16.93 usec  
 TE 367.1 K  
 D1 1.00000000 sec  
 TDC 1  
 SFO1 400.0934706 MHz  
 NUC1 1H  
 PC 4.97 usec  
 P1 14.90 usec  
 PLW1 15.18599987 W

F2 - Processing parameters  
 SI 65536  
 SF 400.0910000 MHz  
 WDW EM  
 SSB 0  
 LB 0.30 Hz  
 GB 0  
 PC 1.00

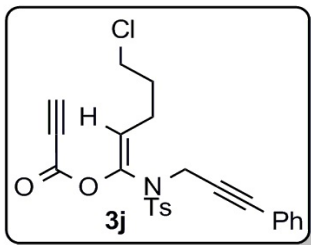

150.14  
144.27  
137.47  
135.91  
131.57  
129.49  
128.46  
128.18  
128.03  
124.66  
122.07

85.56  
82.22  
77.32  
77.04  
77.00  
76.68  
73.60

44.07  
39.95  
31.39  
24.61  
21.43

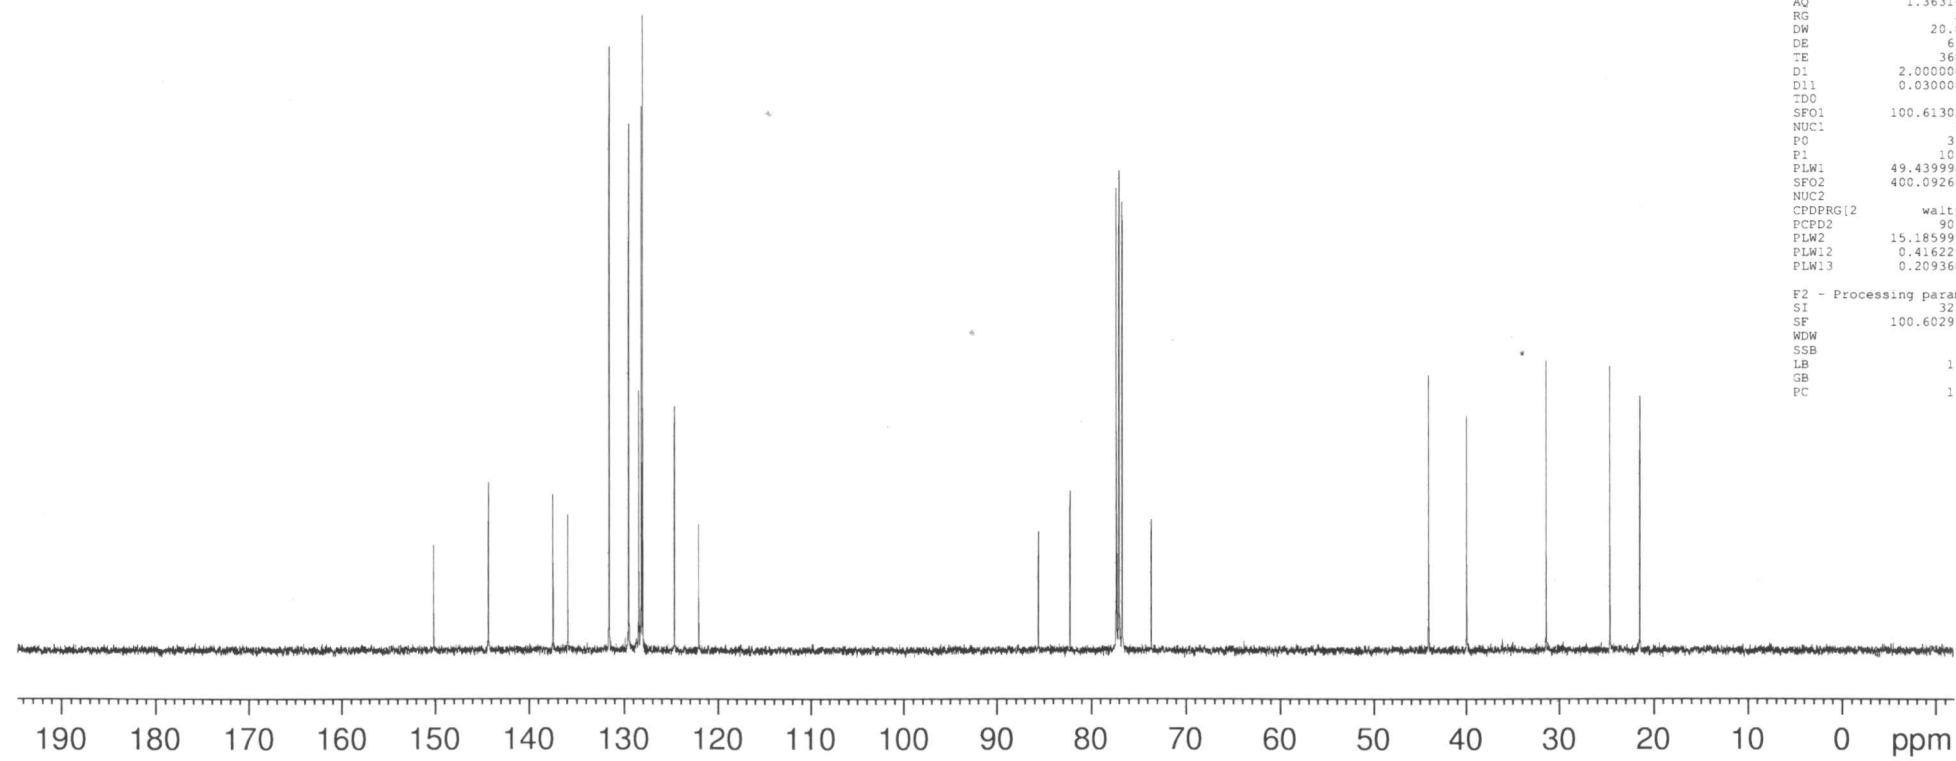

Current Data Parameters  
 NAME Z RP UPDATED 400  
 EXPNO 30  
 PROCNO 1

F2 - Acquisition Parameters  
 Date\_ 20210122  
 Time 16.55 h  
 INSTRUM spect  
 PROBHD Z108618\_0098 ( )  
 PULPROG zgpg30  
 TD 65536  
 SOLVENT CDCl3  
 NS 213  
 DS 4  
 SWH 24038.461 Hz  
 FIDRES 0.733596 Hz  
 AQ 1.3631488 sec  
 RG 203  
 DW 20.800 usec  
 DE 6.50 usec  
 TE 368.2 K  
 D1 2.00000000 sec  
 D11 0.03000000 sec  
 TDO 1  
 SFO1 100.6130223 MHz  
 NUC1 13C  
 P0 3.33 usec  
 P1 10.00 usec  
 PLW1 49.43999863 W  
 SFO2 400.0926004 MHz  
 NUC2 1H  
 CPDPRG2 waltz65  
 PCPD2 90.00 usec  
 PLW2 15.18599987 W  
 PLW12 0.41622999 W  
 PLW13 0.20936000 W

F2 - Processing parameters  
 SI 32768  
 SF 100.6029743 MHz  
 WDW EM  
 SSB 0  
 LB 1.00 Hz  
 GB 0  
 PC 1.40

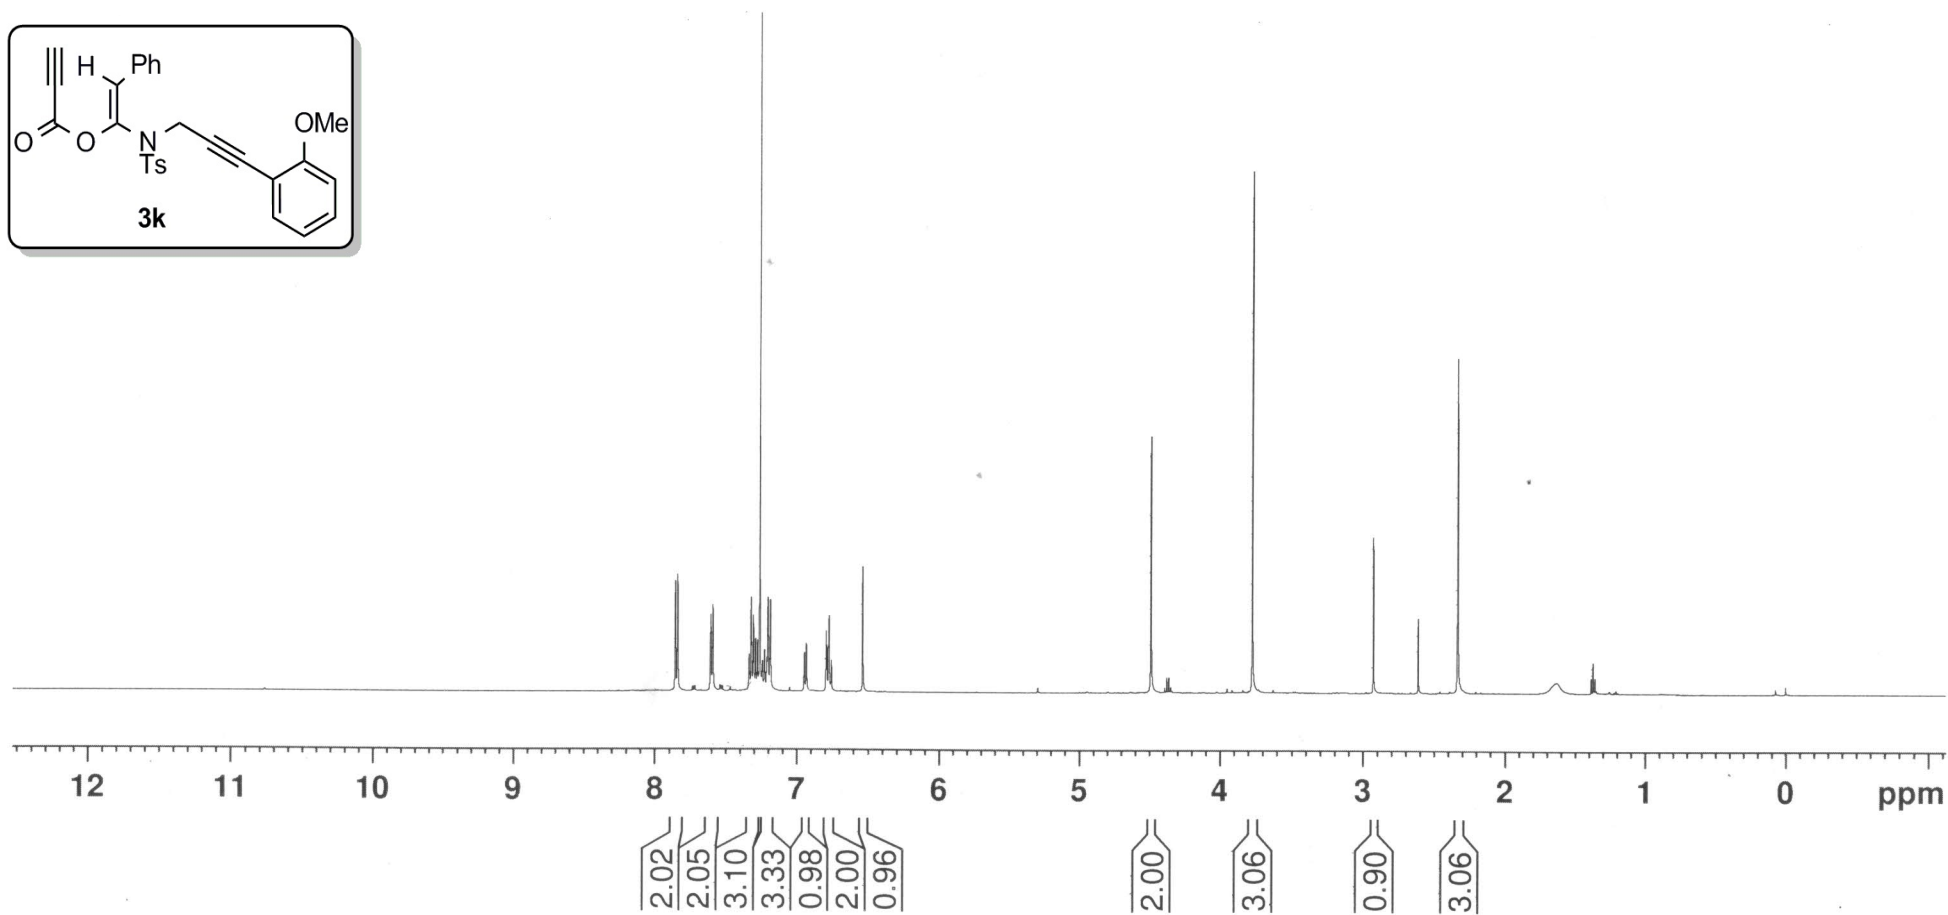



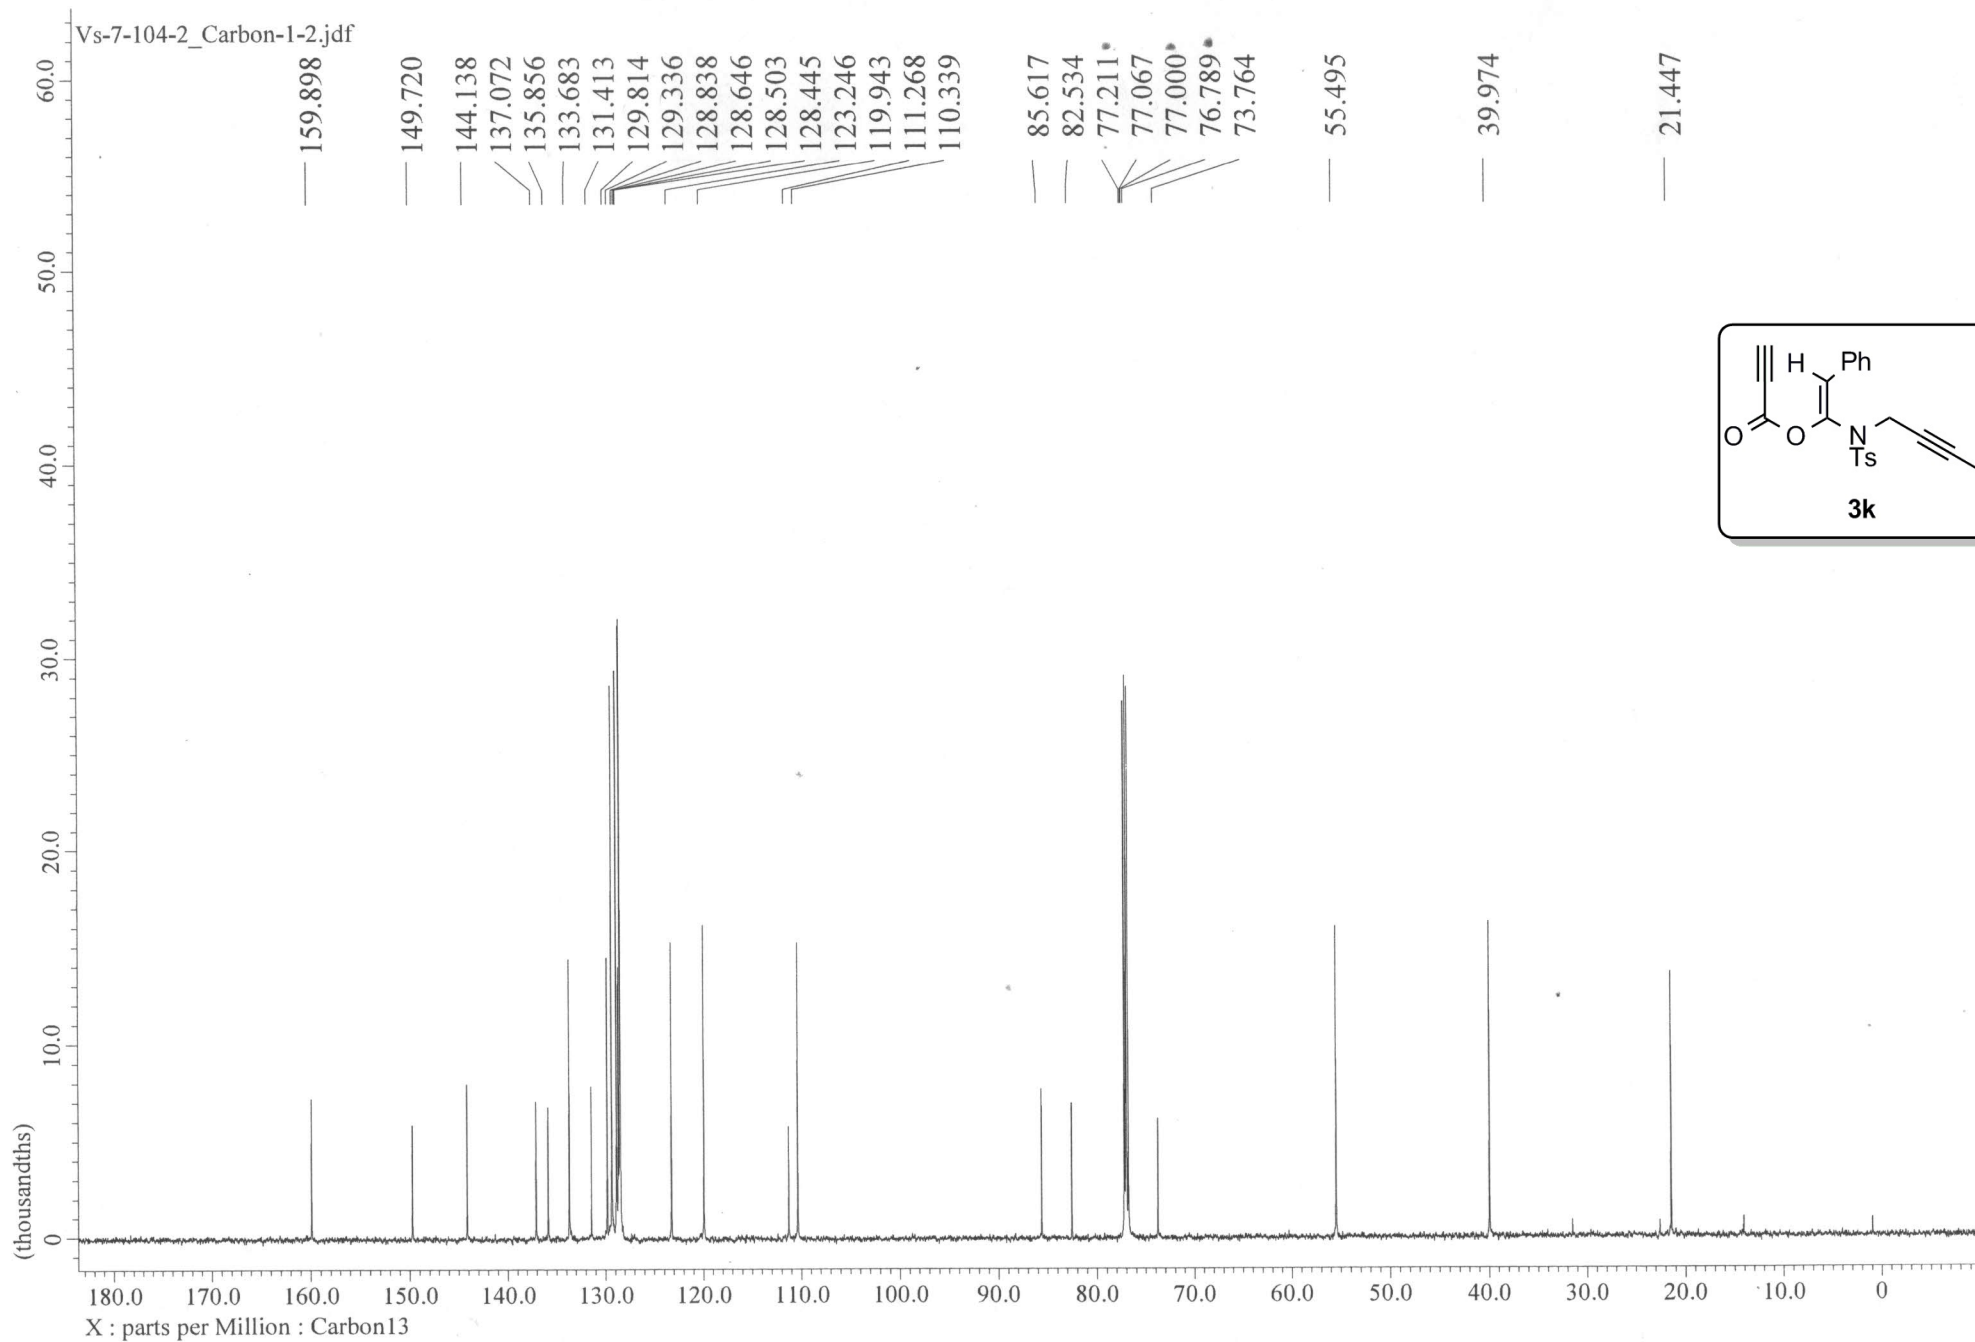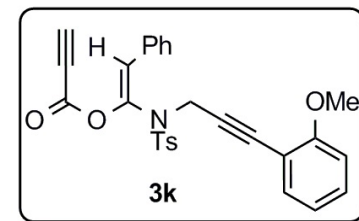

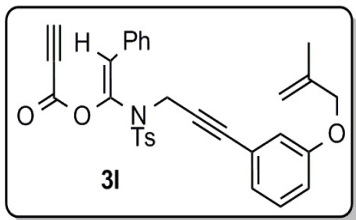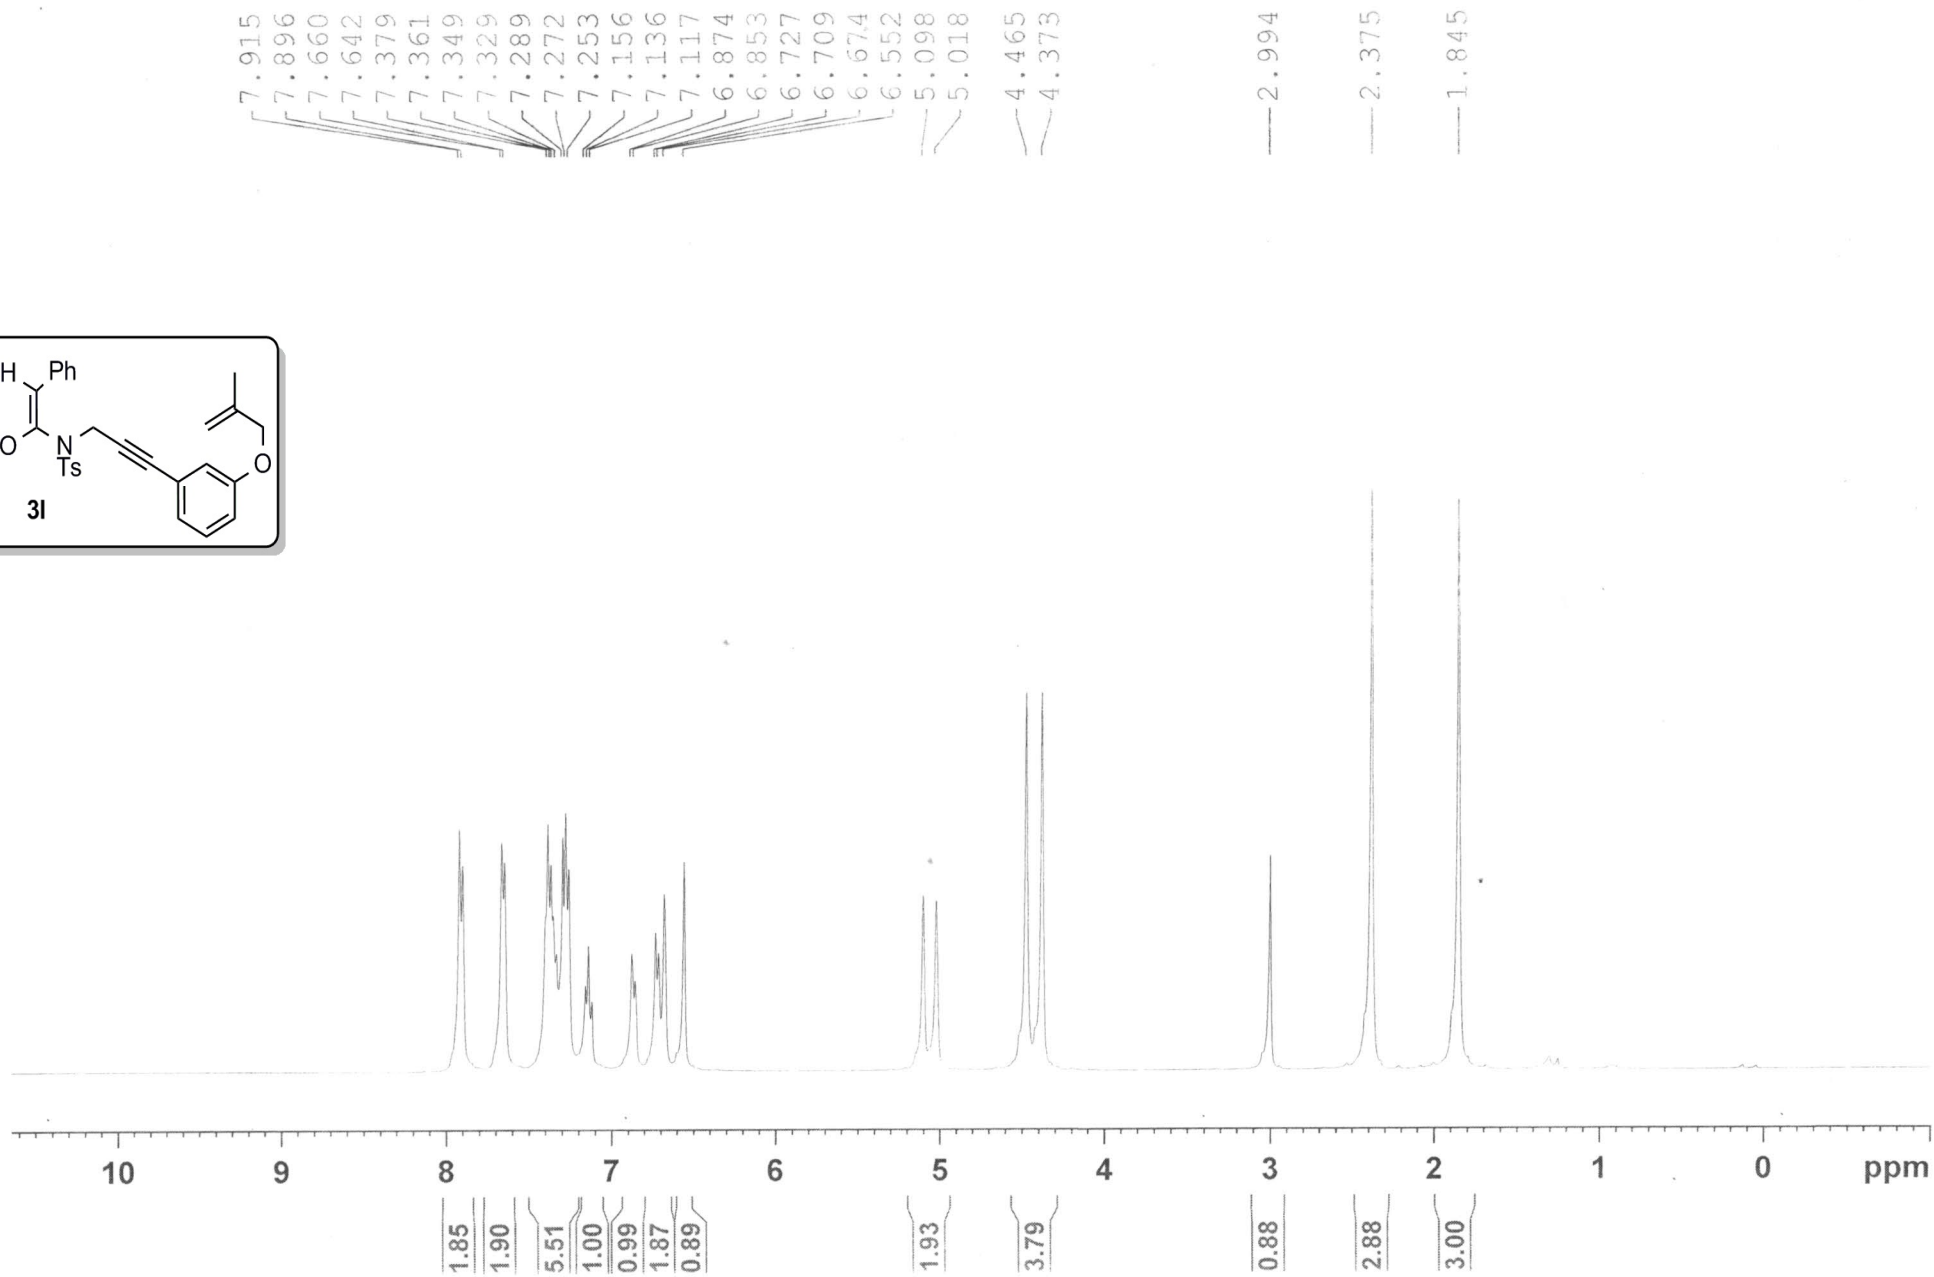

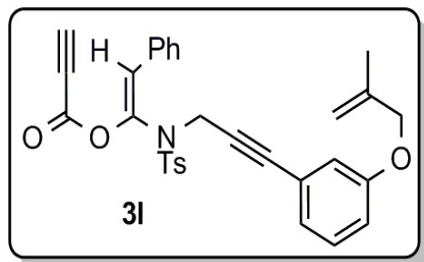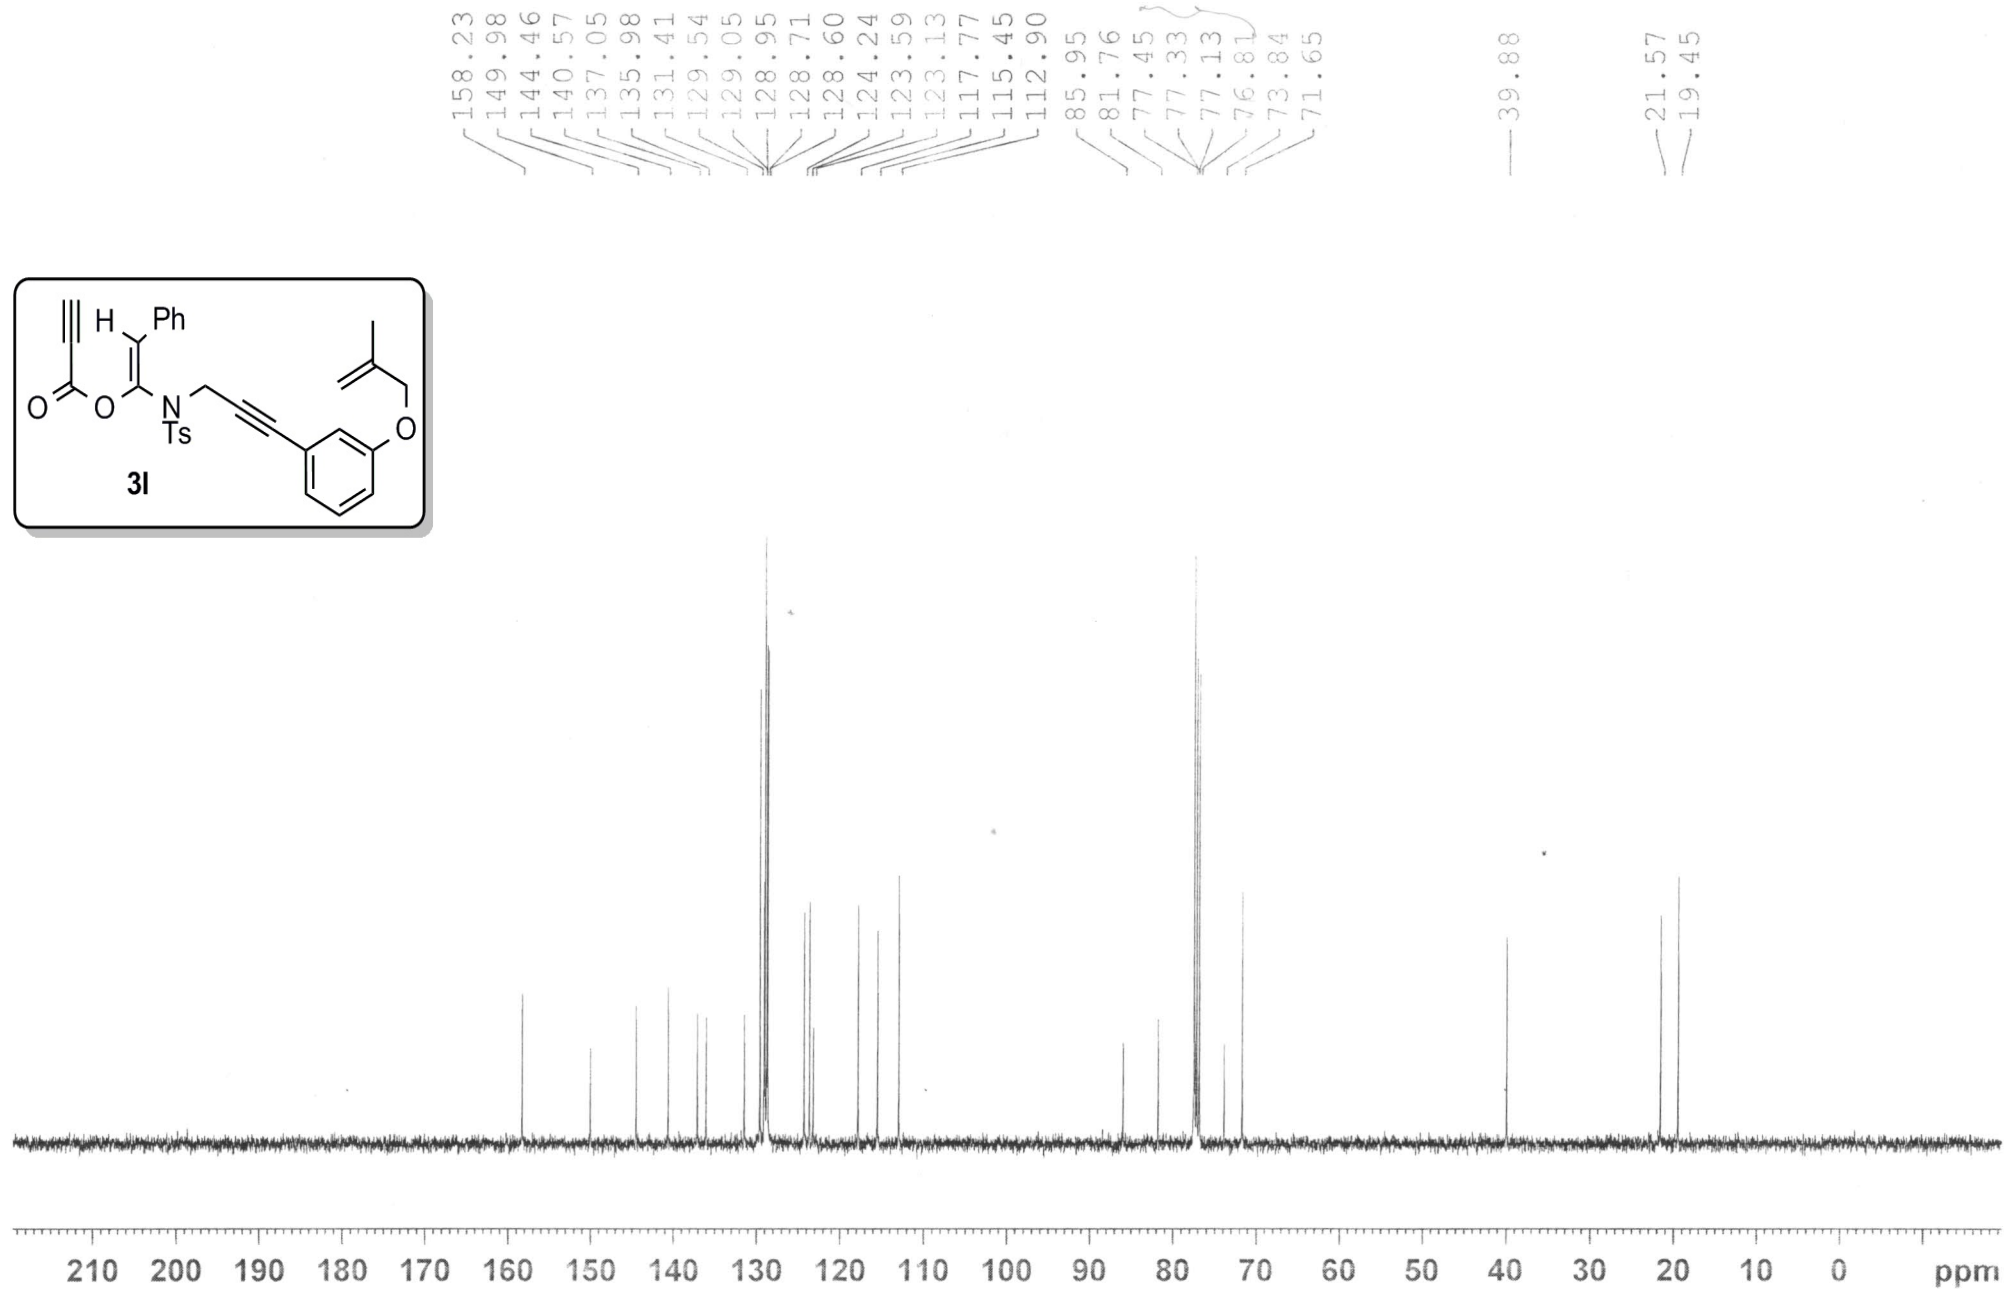

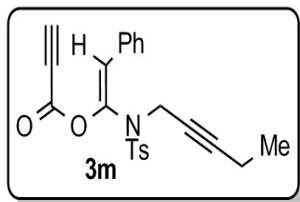

7.848  
7.832  
7.596  
7.581  
7.355  
7.341  
7.326  
7.313  
7.299  
7.281  
7.267  
6.501

4.186

3.043

2.417  
1.942  
1.927  
1.912  
1.897

0.890  
0.875  
0.860

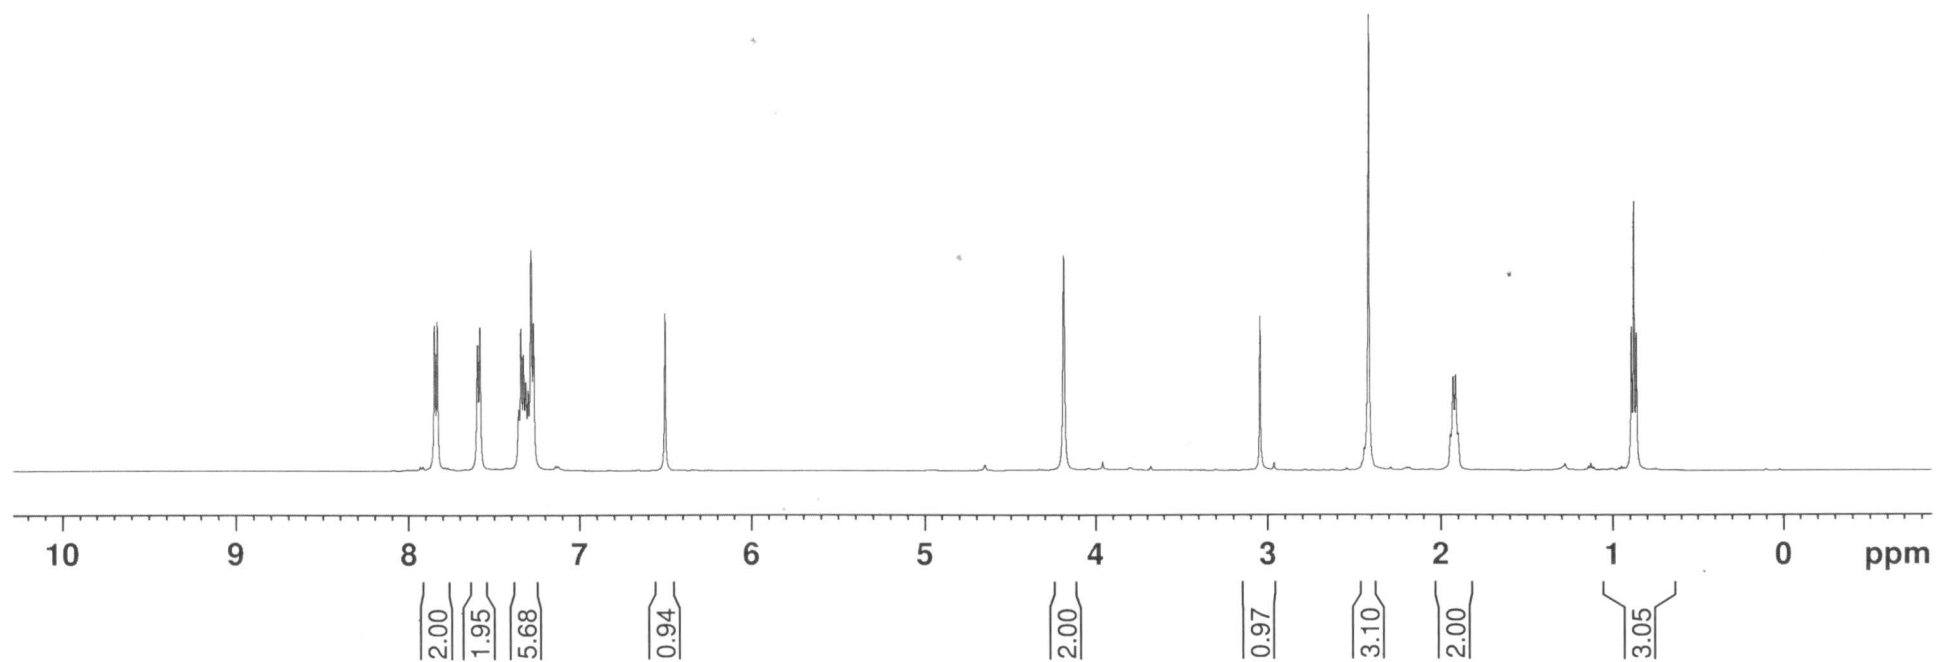

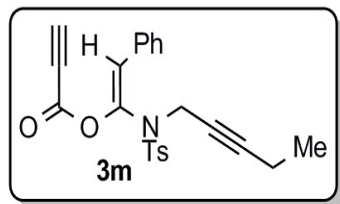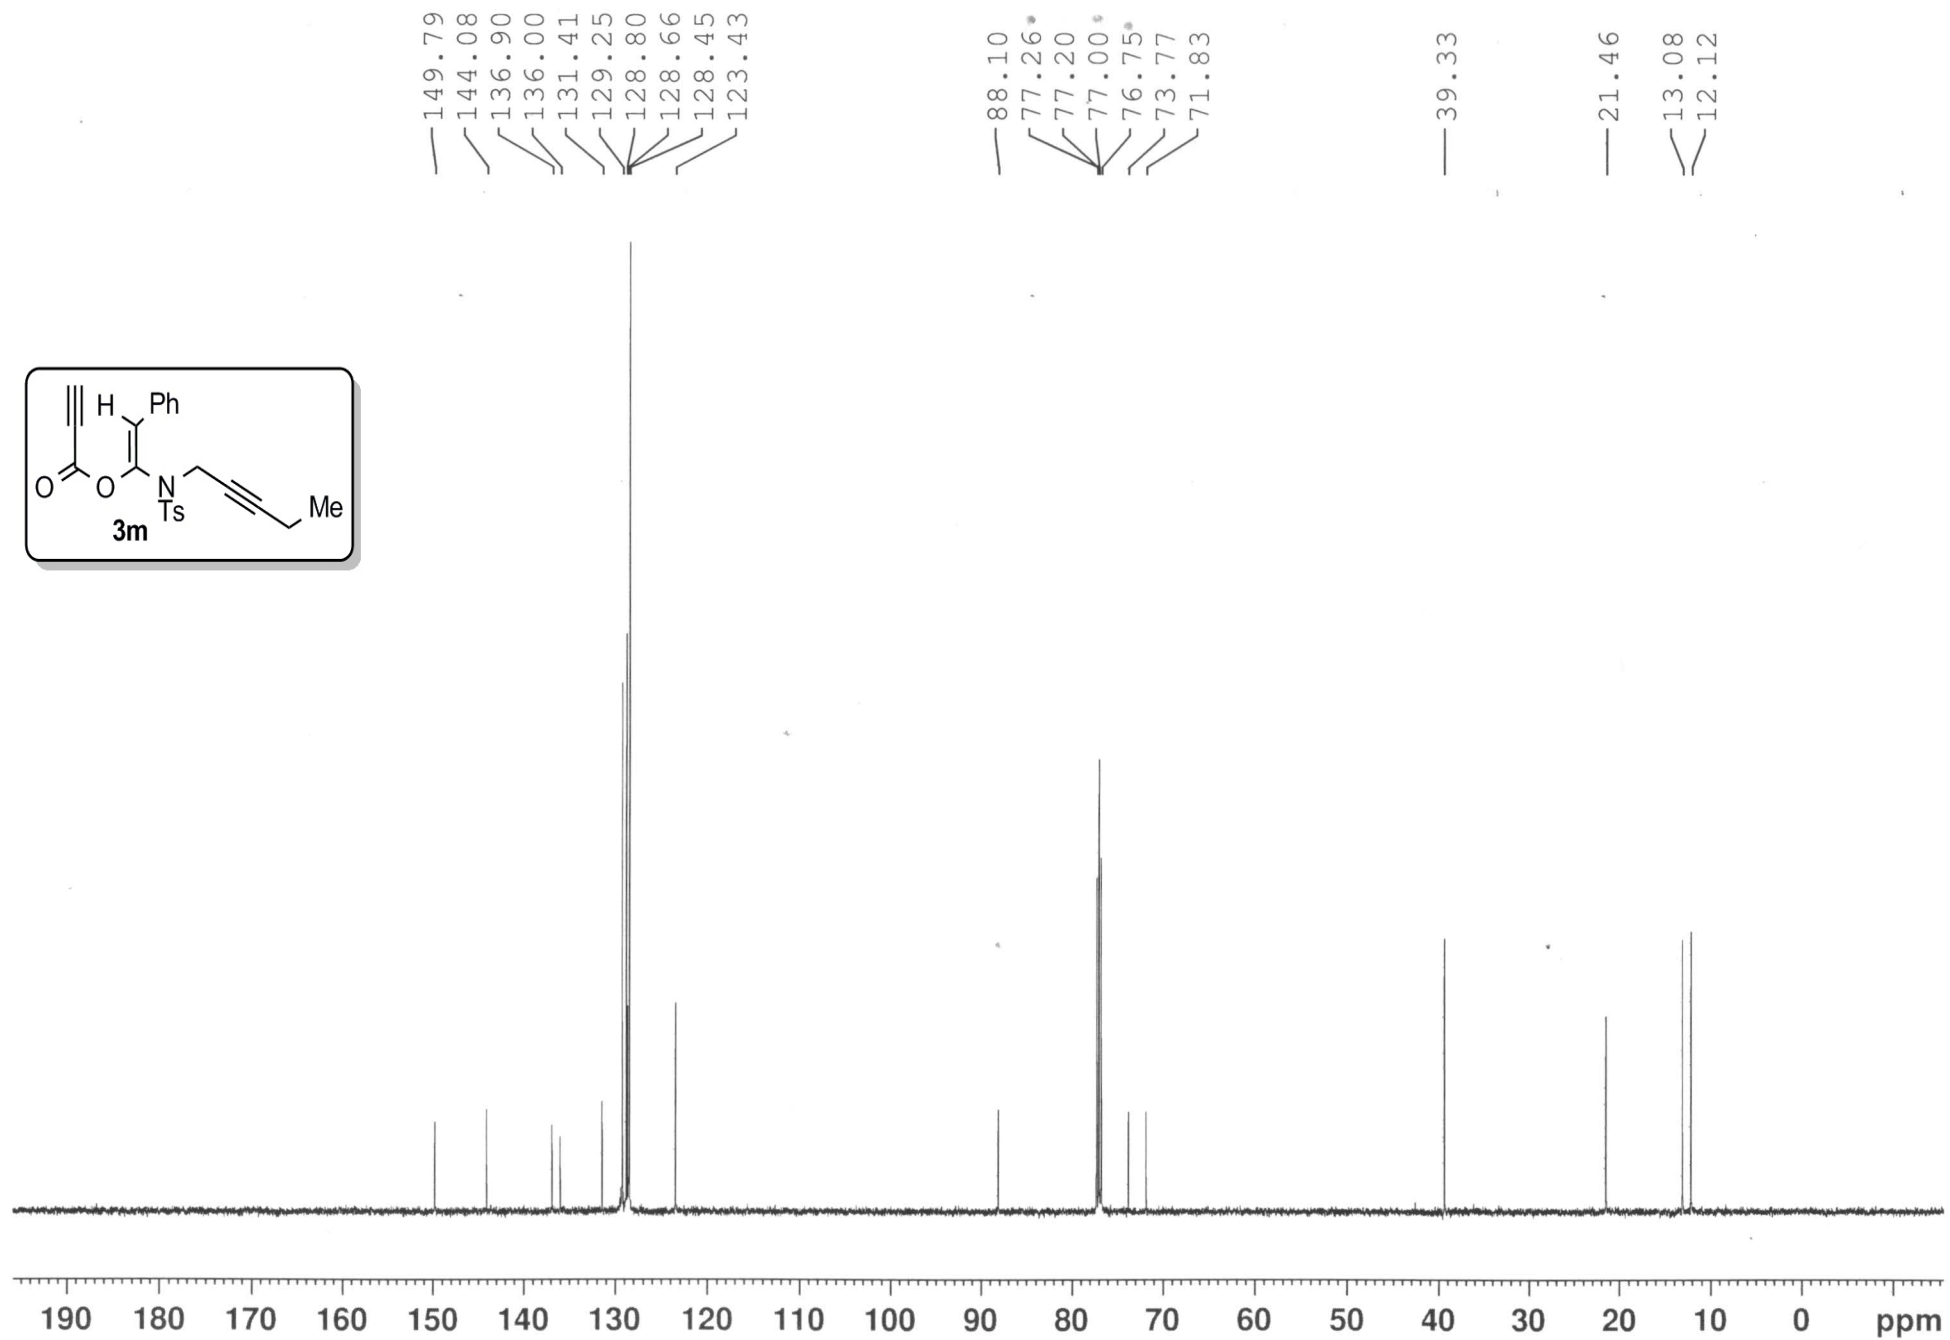

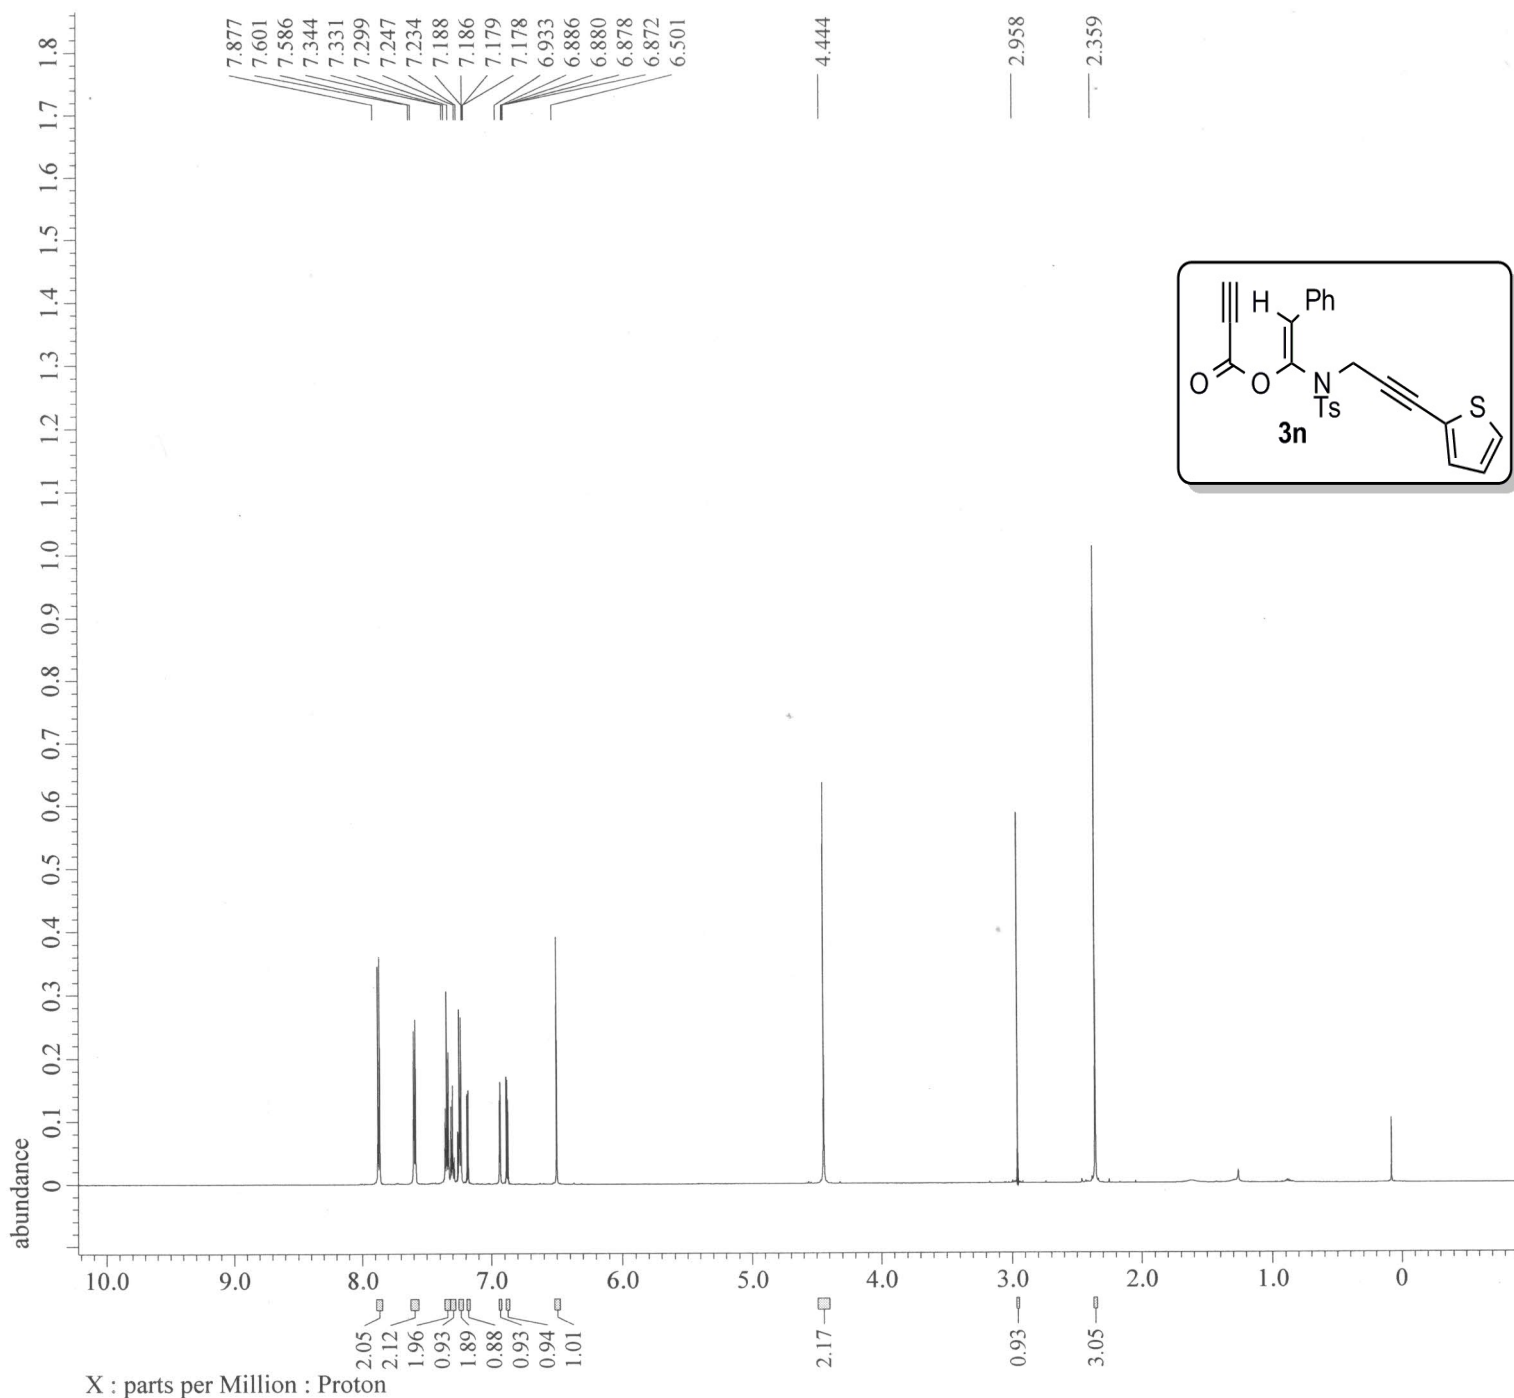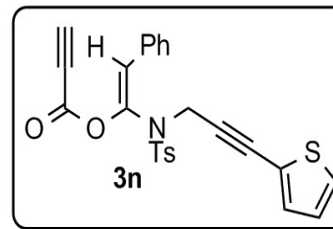

**JEOL**

Filename = vs-17-120\_Proton-1-3.  
 Author = delta  
 Experiment = proton\_auto.jxp  
 Sample\_Id = vs-17-120  
 Solvent = CHLOROFORM-D  
 Actual\_Start\_Time = 20-JAN-2021 10:14:28  
 Revision\_Time = 23-JAN-2021 20:33:58

Comment = single pulse  
 Data\_Format = 1D COMPLEX  
 Dim\_Size = 52429  
 X\_Domain = Proton  
 Dim\_Title = Proton  
 Dim\_Units = [ppm]  
 Dimensions = X  
 Site = ACRHEM\_UOH  
 Spectrometer = JNM-ECZ600R/M1

Field\_Strength = 14.09636928[T] (600[M  
 X\_Acq\_Duration = 0.72876032[s]  
 X\_Domain = Proton  
 X\_Freq = 600.1723046[MHz]  
 X\_Offset = 5[ppm]  
 X\_Points = 16384  
 X\_Prescans = 1  
 X\_Resolution = 1.37219326[Hz]  
 X\_Sweep = 22.48201439[kHz]  
 X\_Sweep\_Clipped = 17.98561151[kHz]  
 Irr\_Domain = Proton  
 Irr\_Freq = 600.1723046[MHz]  
 Irr\_Offset = 5[ppm]  
 Tri\_Domain = Proton  
 Tri\_Freq = 600.1723046[MHz]  
 Tri\_Offset = 5[ppm]  
 Blanking = 2[us]  
 Clipped = FALSE  
 Scans = 16  
 Total\_Scans = 16

Relaxation\_Delay = 5[s]  
 Recvr\_Gain = 36  
 Temp\_Get = 19.2[dC]  
 X\_90\_Width = 6.89[us]  
 X\_Acq\_Time = 0.72876032[s]  
 X\_Angle = 45[deg]  
 X\_Atn = 12.6[dB]  
 X\_Pulse = 3.445[us]  
 Irr\_Mode = Off  
 Tri\_Mode = Off  
 Dante\_Loop = 500  
 Dante\_Presat = FALSE  
 Decimation\_Rate = 0  
 Experiment\_Path = c:\Program Files\JEOL  
 Initial\_Wait = 1[s]  
 Phase = {0, 90, 270, 180, 180  
 Presat\_Time = 5[s]  
 Presat\_Time\_Flag = FALSE  
 Relaxation\_Delay\_Calc = 0[s]  
 Relaxation\_Delay\_Temp = 5[s]  
 Repetition\_Time = 5.72876032[s]

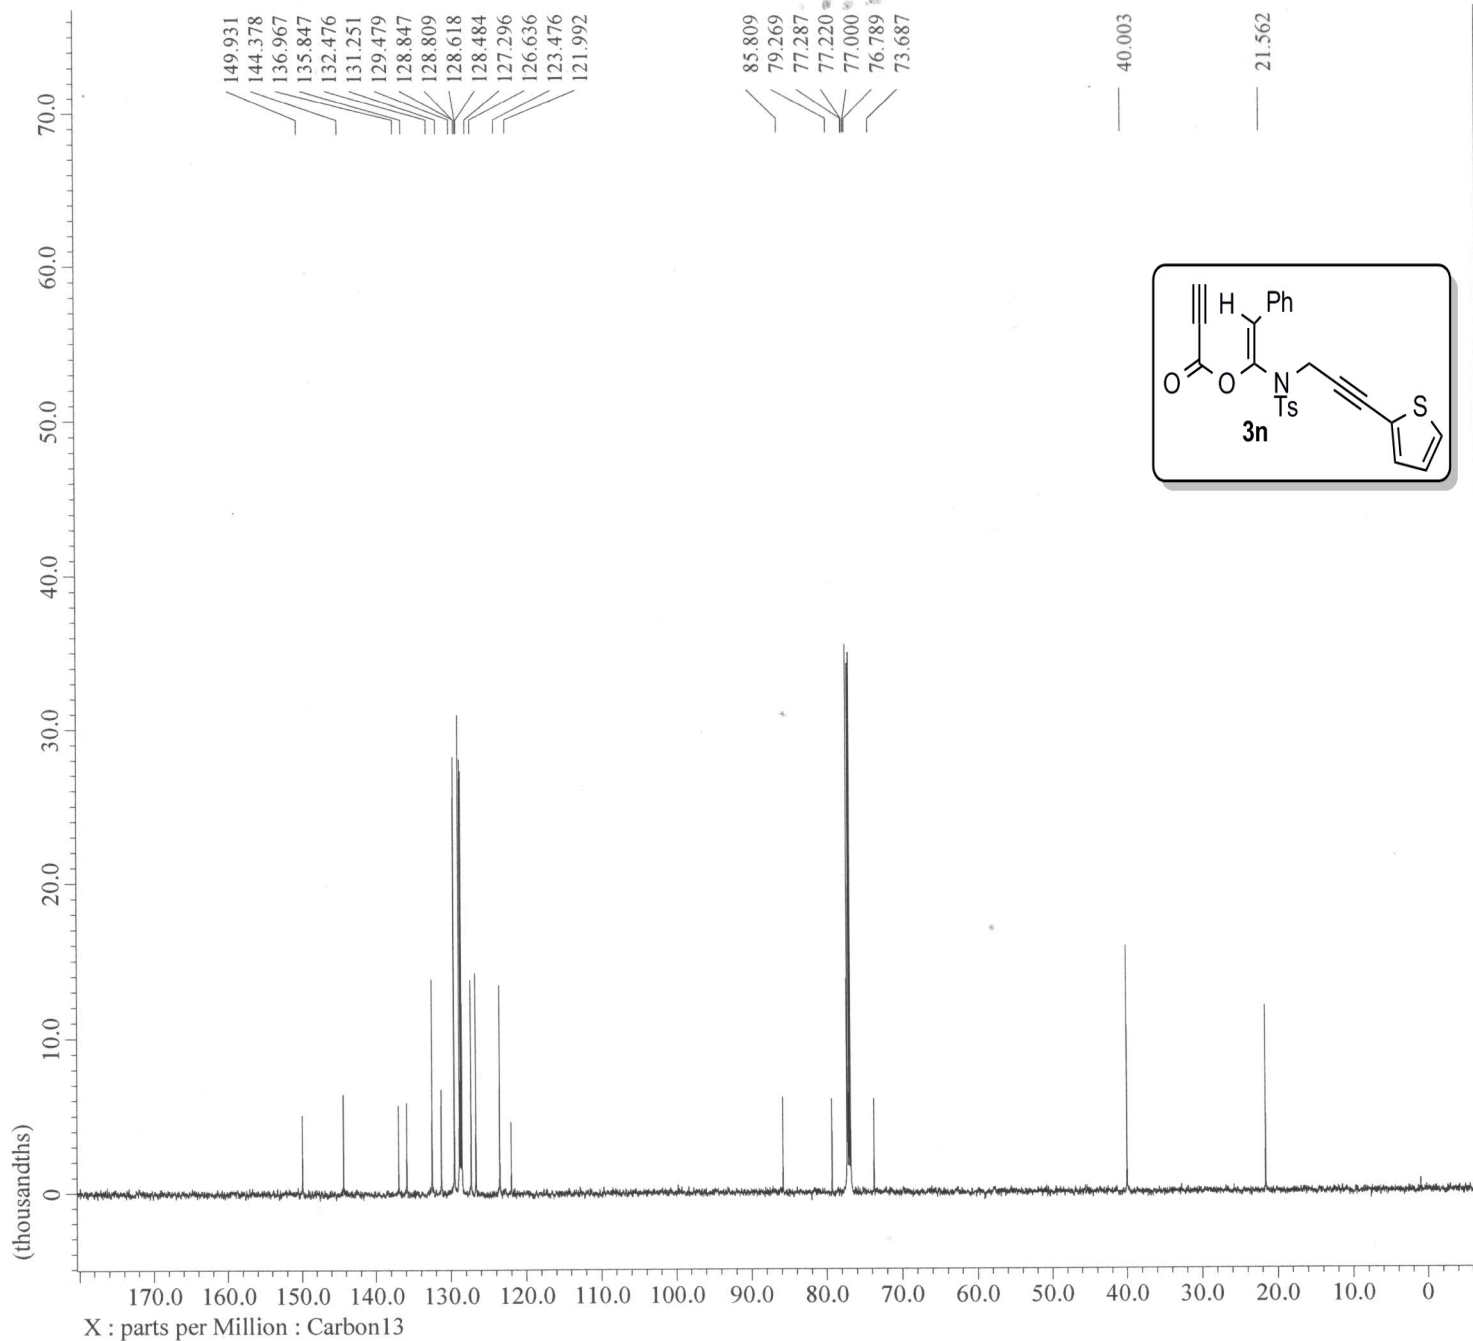

JEOL

Filename = vs-17-120\_Carbon-1  
Author = delta  
Experiment = carbon\_auto.jxp  
Sample\_Id = vs-17-120  
Solvent = CHLOROFORM-D  
Actual\_Start\_Time = 20-JAN-2021 10:16:  
Revision\_Time = 23-JAN-2021 20:20:

Comment = single pulse decou  
Data\_Format = 1D\_COMPLEX  
Dim\_Size = 26214  
X\_Domain = Carbon13  
Dim\_Title = Carbon13  
Dim\_Units = [ppm]  
Dimensions = X  
Site = ACRHEM\_UOH  
Spectrometer = JNM-ECZ600R/M1

Field\_Strength = 14.09636928[T] (60  
X\_Acq\_Duration = 0.34603008[s]  
X\_Domain = carbon13  
X\_Freq = 150.91343039[MHz]  
X\_Offset = 100[ppm]  
X\_Points = 16384  
X\_Prescans = 4  
X\_Resolution = 2.88992217[Hz]  
X\_Sweep = 47.34848485[kHz]  
X\_Sweep\_Clipped = 37.87878788[kHz]  
Irr\_Domain = Proton  
Irr\_Freq = 600.1723046[MHz]  
Irr\_Offset = 5[ppm]  
Blanking = 2[us]  
Clipped = FALSE  
Scans = 256  
Total\_Scans = 256

Relaxation\_Delay = 2[s]  
Recvr\_Gain = 56  
Temp\_Get = 19.4[dC]  
X\_90\_Width = 11[us]  
X\_Acq\_Time = 0.34603008[s]  
X\_Angle = 30[deg]  
X\_Atn = 10.3[dB]  
X\_Pulse = 3.66666667[us]  
Irr\_Atn\_Dec = 33.452[dB]  
Irr\_Atn\_Dec\_Calc = 33.452[dB]  
Irr\_Atn\_Dec\_Default\_Calc = 33.452[dB]  
Irr\_Atn\_No = 33.452[dB]  
Irr\_Dec\_Bandwidth\_Hz = 7.23684211[kHz]  
Irr\_Dec\_Bandwidth\_Ppm = 12.05794078[ppm]  
Irr\_Dec\_Freq = 600.1723046[MHz]  
Irr\_Dec\_Merit\_Factor = 2.2  
Irr\_Decoupling = TRUE  
Irr\_No = TRUE  
Irr\_Noise = WALTZ  
Irr\_Offset\_Default = 5[ppm]  
Irr\_Pwidth = 76[us]  
Irr\_Pwidth\_Default = 76[us]  
Irr\_Pwidth\_Default\_Calc = 76[us]  
Irr\_Pwidth\_Temp1 = 76[us]  
Irr\_Wurst = FALSE  
Decimation\_Rate = 0

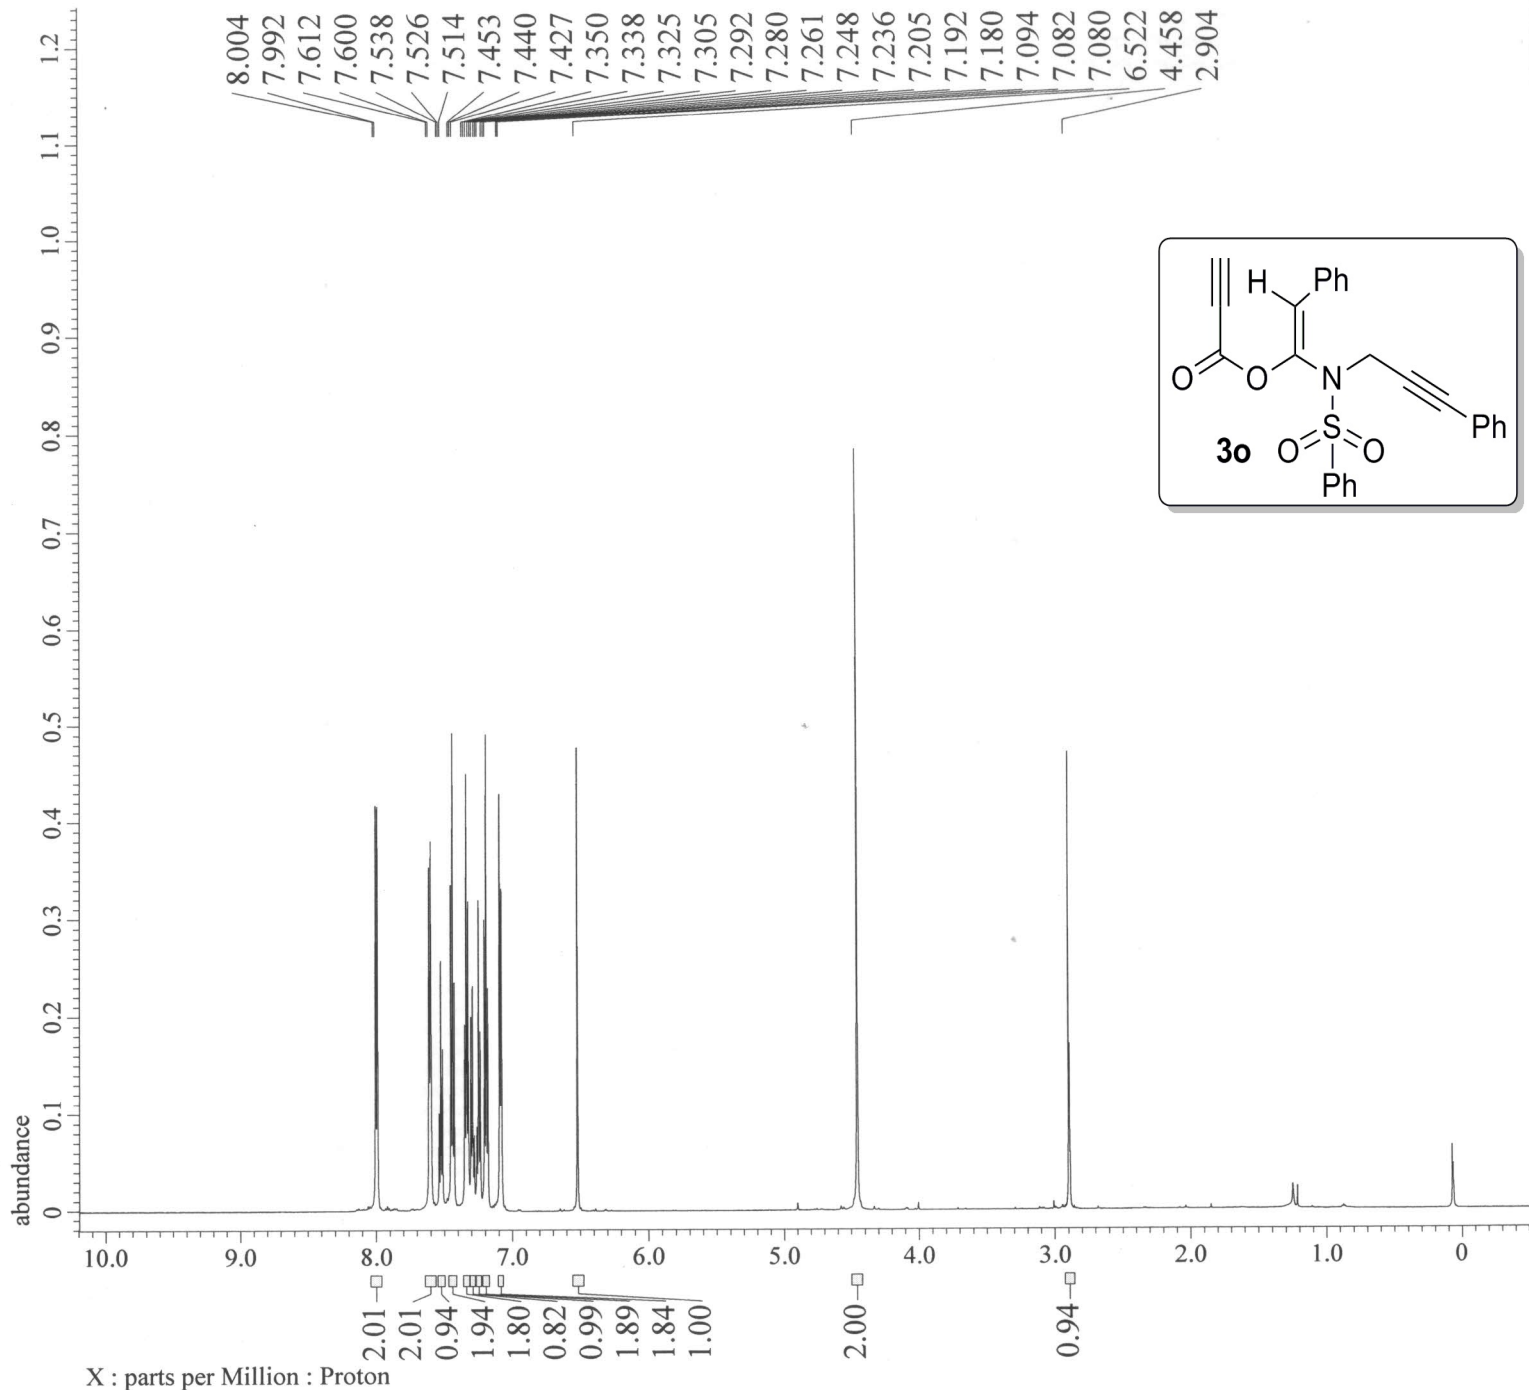

|                       |                         |
|-----------------------|-------------------------|
| Filename              | = vs-15-174_Proton-1-8. |
| Author                | = delta                 |
| Experiment            | = proton_auto.jxp       |
| Sample_Id             | = vs-15-174             |
| Solvent               | = CHLOROFORM-D          |
| Actual_Start_Time     | = 18-JAN-2021 16:22:42  |
| Revision_Time         | = 10-FEB-2021 23:34:04  |
| Comment               | = single_pulse          |
| Data_Format           | = 1D_COMPLEX            |
| Dim_Size              | = 52429                 |
| X_Domain              | = Proton                |
| Dim_Title             | = Proton                |
| Dim_Units             | = [ppm]                 |
| Dimensions            | = X                     |
| Site                  | = ACRHEM UOH            |
| Spectrometer          | = JNM-ECZ600R/M1        |
| Field_Strength        | = 14.09636928[T] (600[M |
| X_Acq_Duration        | = 0.72876032[s]         |
| X_Domain              | = Proton                |
| X_Freq                | = 600.1723046[MHz]      |
| X_Offset              | = 5[ppm]                |
| X_Points              | = 16384                 |
| X_Prescans            | = 1                     |
| X_Resolution          | = 1.37219326[Hz]        |
| X_Sweep               | = 22.48201439[kHz]      |
| X_Sweep_Clippped      | = 17.98561151[kHz]      |
| Irr_Domain            | = Proton                |
| Irr_Freq              | = 600.1723046[MHz]      |
| Irr_Offset            | = 5[ppm]                |
| Tri_Domain            | = Proton                |
| Tri_Freq              | = 600.1723046[MHz]      |
| Tri_Offset            | = 5[ppm]                |
| Blanking              | = 2[us]                 |
| Clipped               | = FALSE                 |
| Scans                 | = 16                    |
| Total_Scans           | = 16                    |
| Relaxation_Delay      | = 5[s]                  |
| Recvr_Gain            | = 56                    |
| Temp_Get              | = 19.6[dC]              |
| X_90_Width            | = 6.89[us]              |
| X_Acq_Time            | = 0.72876032[s]         |
| X_Angle               | = 45[deg]               |
| X_Atn                 | = 12.6[dB]              |
| X_Pulse               | = 3.445[us]             |
| Irr_Mode              | = Off                   |
| Tri_Mode              | = Off                   |
| Dante_Loop            | = 500                   |
| Dante_Presat          | = FALSE                 |
| Decimation_Rate       | = 0                     |
| Experiment_Path       | = c:\Program Files\JEOL |
| Initial_Wait          | = 1[s]                  |
| Phase                 | = {0, 90, 270, 180, 180 |
| Presat_Time           | = 5[s]                  |
| Presat_Time_Flag      | = FALSE                 |
| Relaxation_Delay_Calc | = 0[s]                  |
| Relaxation_Delay_Temp | = 5[s]                  |
| Repetition_Time       | = 5.72876032[s]         |

X : parts per Million : Proton



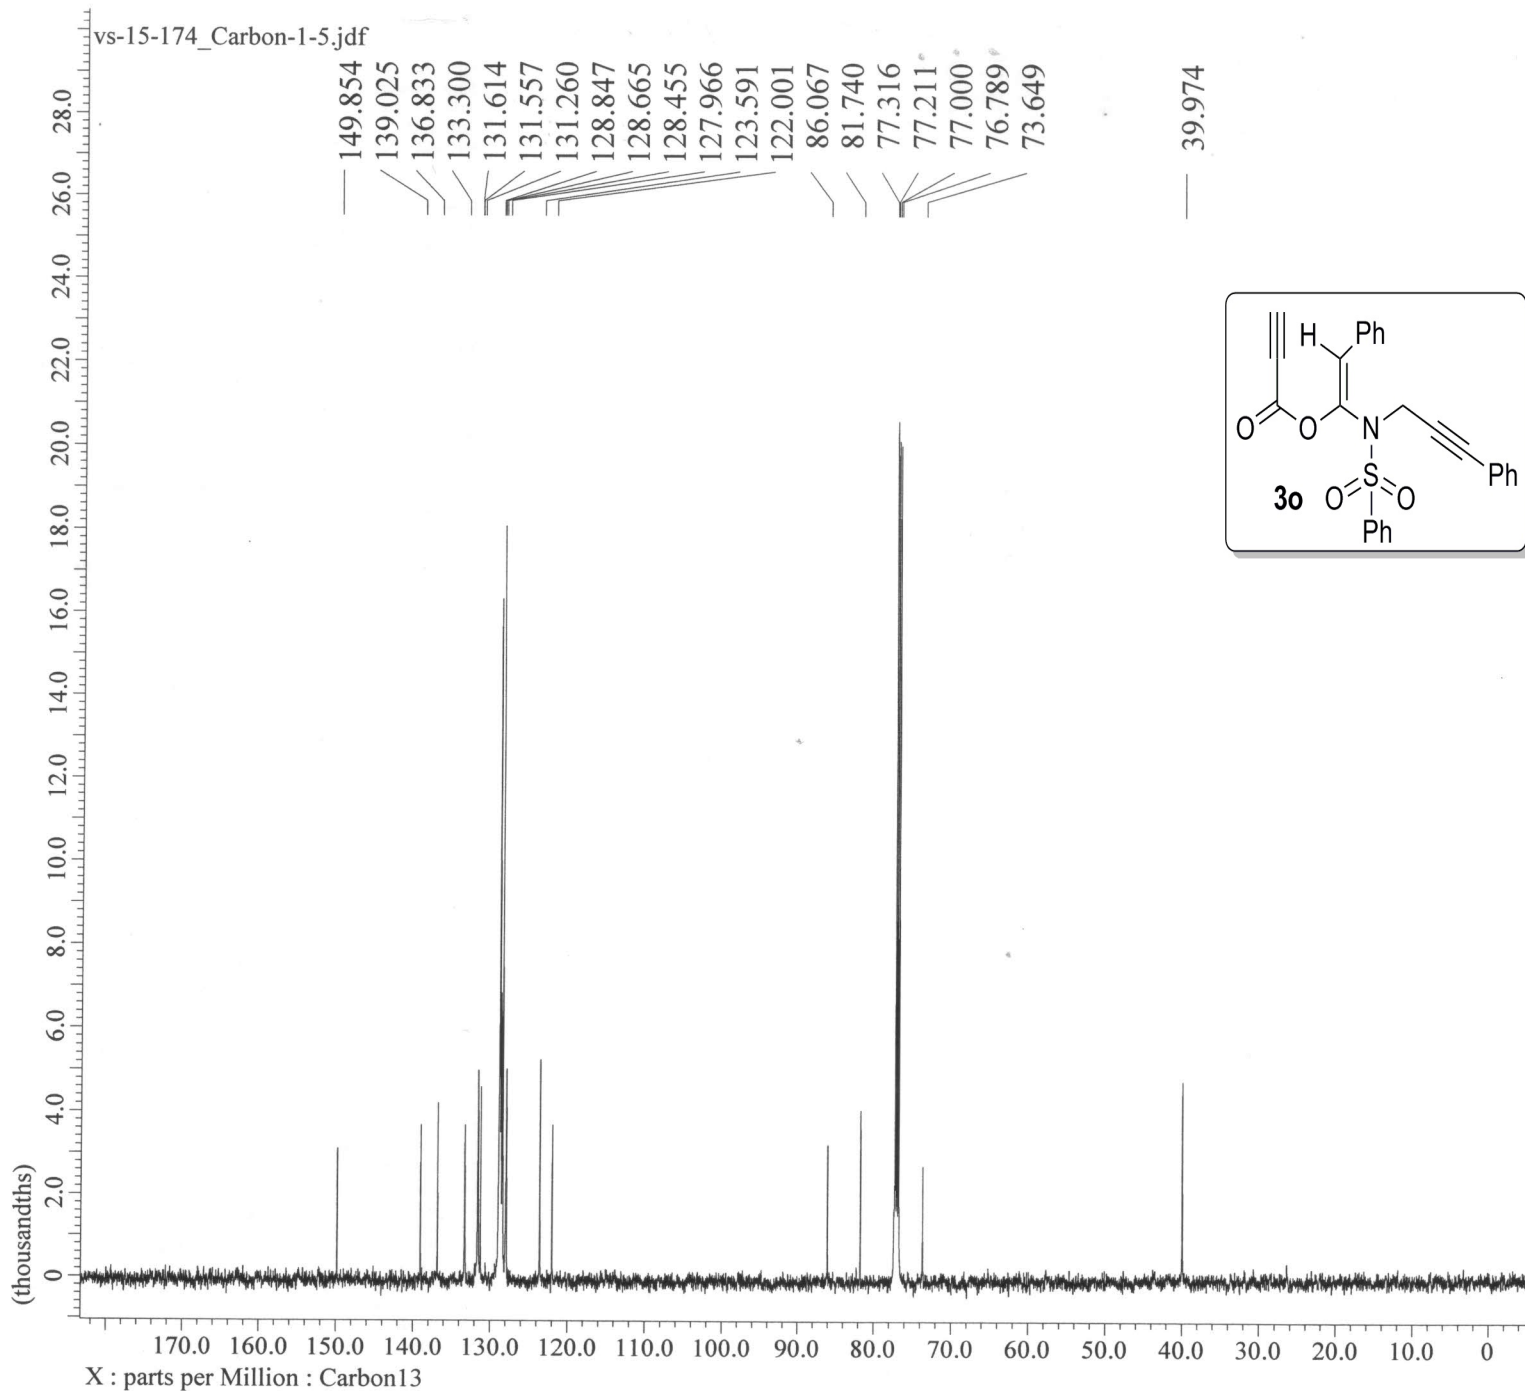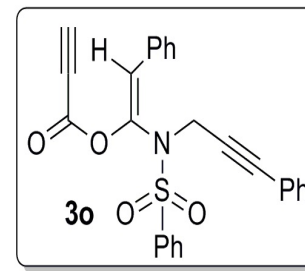

|                          |                      |
|--------------------------|----------------------|
| Filename                 | = vs-15-174_Carbon-1 |
| Author                   | = delta              |
| Experiment               | = carbon auto.jxp    |
| Sample Id                | = vs-15-174          |
| Solvent                  | = CHLOROFORM-D       |
| Actual_Start_Time        | = 18-JAN-2021 16:24: |
| Revision_Time            | = 10-FEB-2021 23:30: |
| Comment                  | = single pulse decou |
| Data Format              | = 1D COMPLEX         |
| Dim_Size                 | = 26214              |
| X_Domain                 | = Carbon13           |
| Dim_Title                | = Carbon13           |
| Dim_Units                | = [ppm]              |
| Dimensions               | = X                  |
| Site                     | = ACRHEM UOH         |
| Spectrometer             | = JNM-ECZ600R/M1     |
| Field Strength           | = 14.09636928[T] (60 |
| X_Acq_Duration           | = 0.34603008[s]      |
| X_Domain                 | = Carbon13           |
| X_Freq                   | = 150.91343039[MHz]  |
| X_Offset                 | = 100[ppm]           |
| X_Points                 | = 16384              |
| X_Prescans               | = 4                  |
| X_Resolution             | = 2.88992217[Hz]     |
| X_Sweep                  | = 47.34848485[kHz]   |
| X_Sweep_Clippped         | = 37.87878788[kHz]   |
| Irr_Domain               | = Proton             |
| Irr_Freq                 | = 600.1723046[MHz]   |
| Irr_Offset               | = 5[ppm]             |
| Blanking                 | = 2[us]              |
| Clipped                  | = FALSE              |
| Scans                    | = 400                |
| Total_Scans              | = 400                |
| Relaxation_Delay         | = 2[s]               |
| Recvr_Gain               | = 56                 |
| Temp_Get                 | = 19.5[dc]           |
| X_90_Width               | = 11[us]             |
| X_Acq_Time               | = 0.34603008[s]      |
| X_Angle                  | = 30[deg]            |
| X_Atn                    | = 10.3[dB]           |
| X_Pulse                  | = 3.66666667[us]     |
| Irr_Atn_Dec              | = 33.452[dB]         |
| Irr_Atn_Dec_Calc         | = 33.452[dB]         |
| Irr_Atn_Dec_Default_Calc | = 33.452[dB]         |
| Irr_Atn_No               | = 33.452[dB]         |
| Irr_Dec_Bandwidth_Hz     | = 7.23684211[kHz]    |
| Irr_Dec_Bandwidth_Ppm    | = 12.05794078[ppm]   |
| Irr_Dec_Freq             | = 600.1723046[MHz]   |
| Irr_Dec_Merit_Factor     | = 2.2                |
| Irr_Decoupling           | = TRUE               |
| Irr_No                   | = TRUE               |
| Irr_Noise                | = WALTZ              |
| Irr_Offset_Default       | = 5[ppm]             |
| Irr_Pwidth               | = 76[us]             |
| Irr_Pwidth_Default       | = 76[us]             |
| Irr_Pwidth_Default_Calc  | = 76[us]             |
| Irr_Pwidth_Temp1         | = 76[us]             |
| Irr_Wurst                | = FALSE              |
| Decimation_Rate          | = 0                  |
| Experiment_Path          | = c:\Program Files\J |
| Initial_Wait             | = 1[s]               |
| Noe_Time                 | = 2[s]               |
| Noe_Time_Flag            | = FALSE              |
| Relaxation_Delay_Calc    | = 0[s]               |
| Relaxation_Delay_Temp    | = 2[s]               |

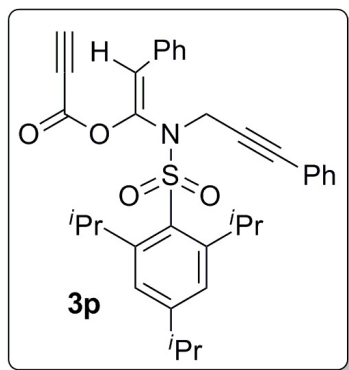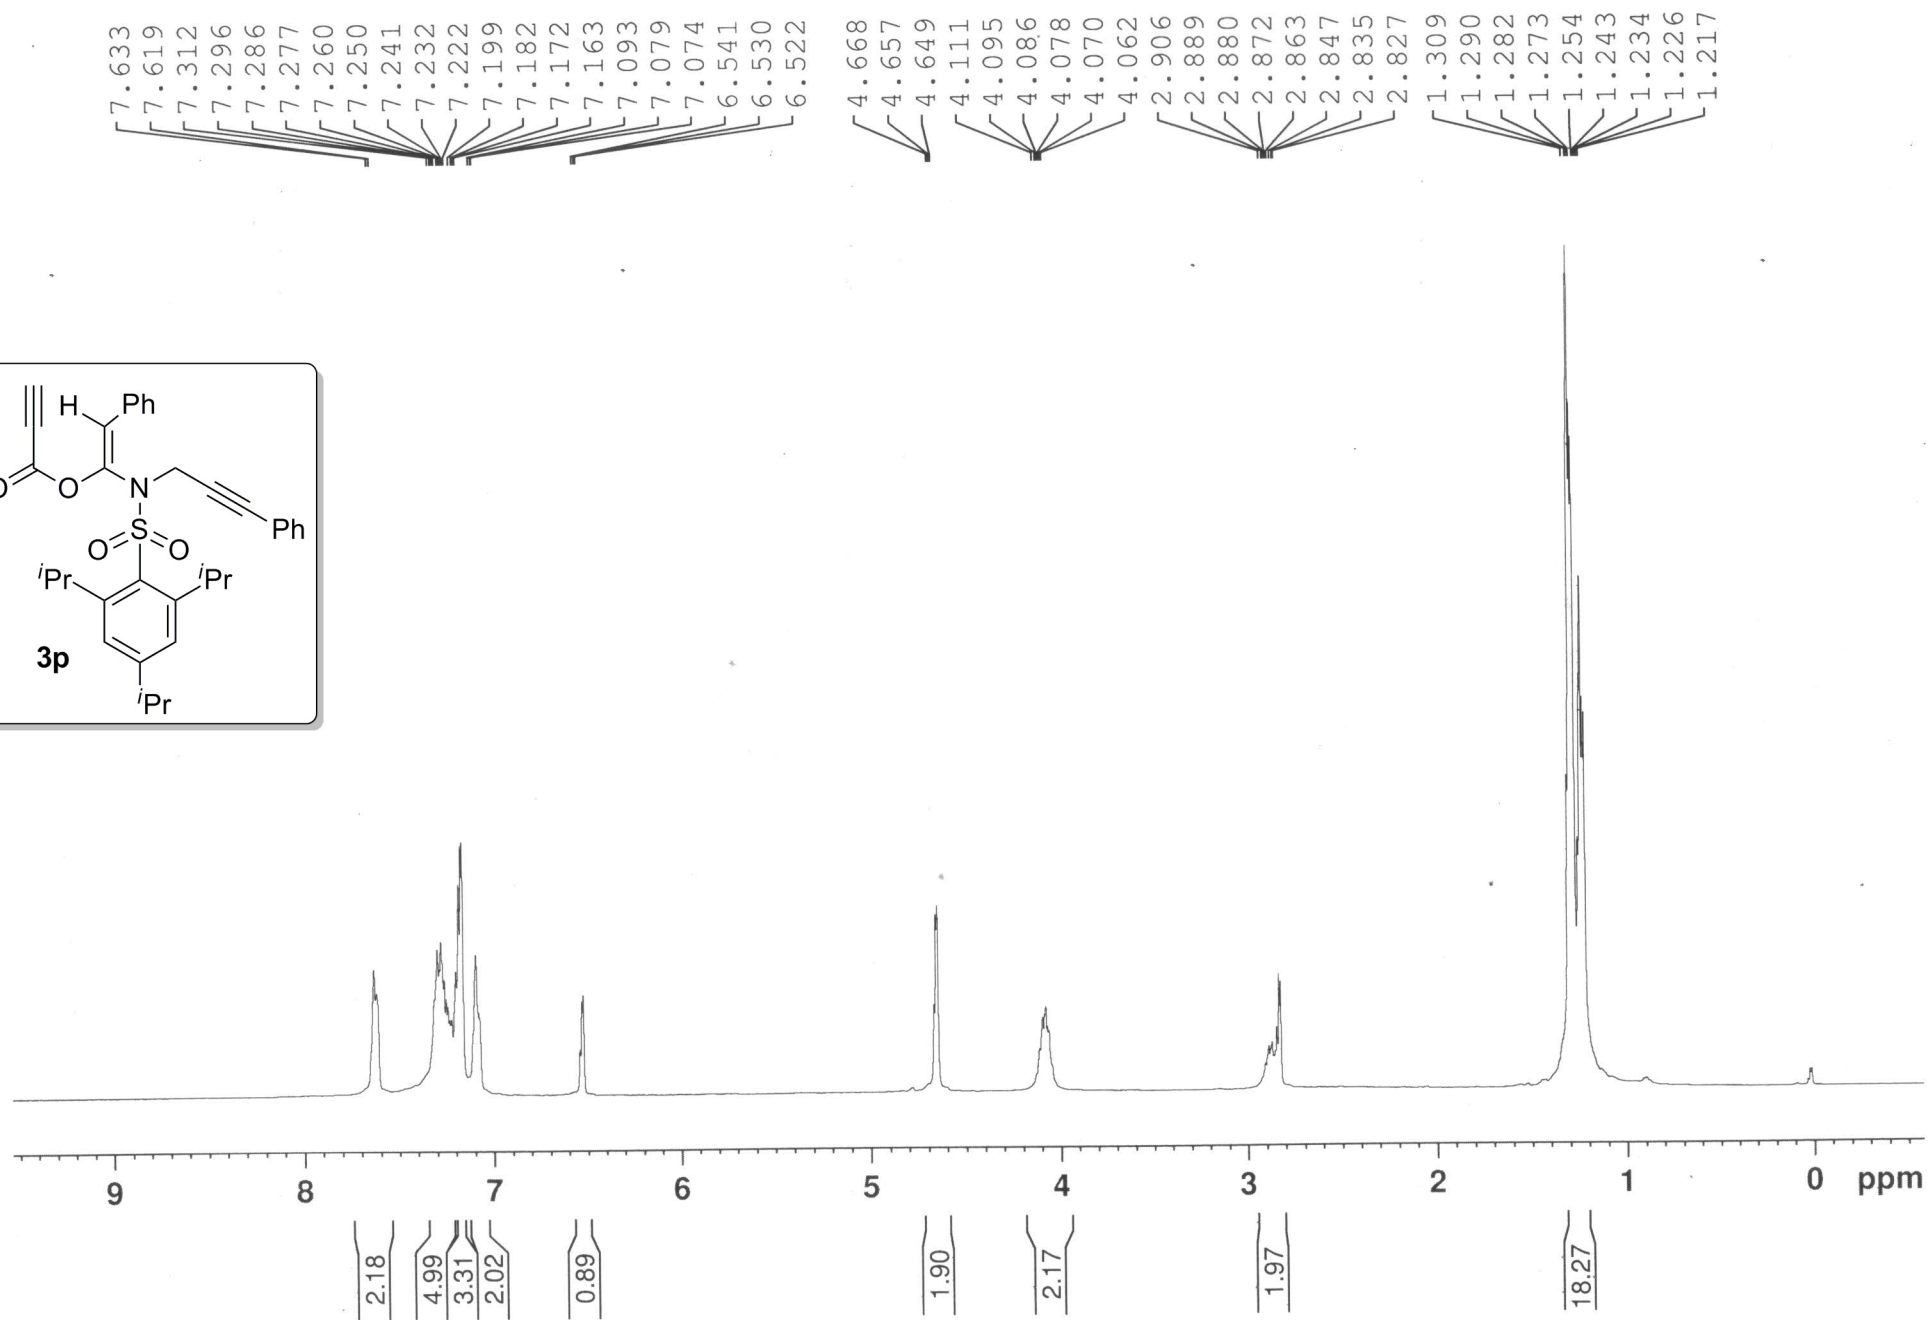

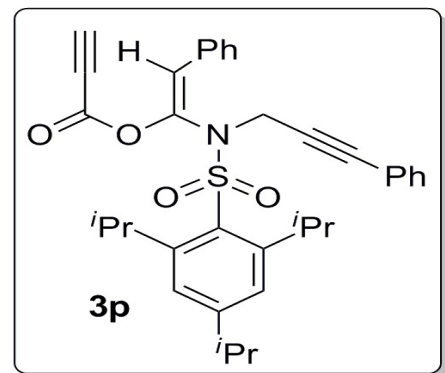

153.45  
151.67  
150.53  
136.64  
133.34  
131.61  
131.49  
129.04  
128.75  
128.41  
128.29  
127.95  
124.16  
123.82  
122.36

85.68  
82.71  
77.32  
77.00  
76.69  
73.94

39.04  
34.15  
30.48  
25.10  
23.48

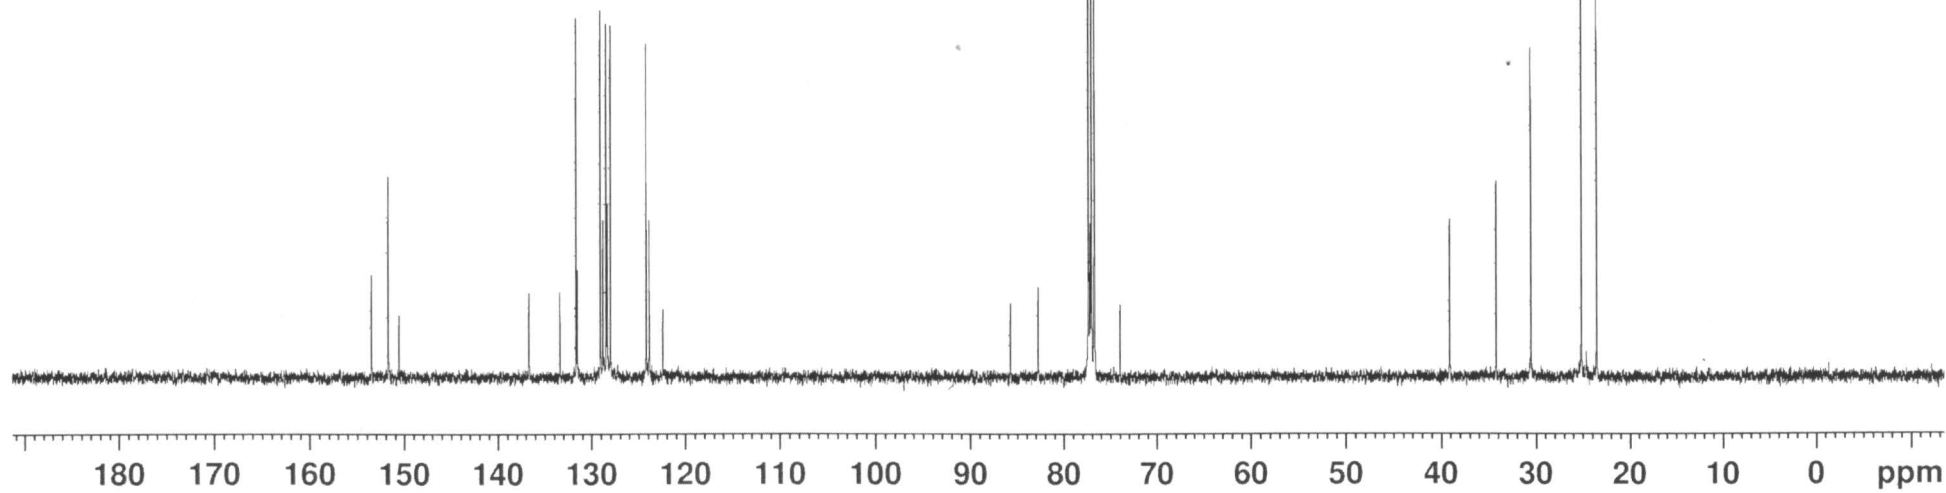

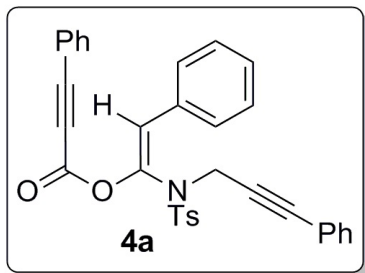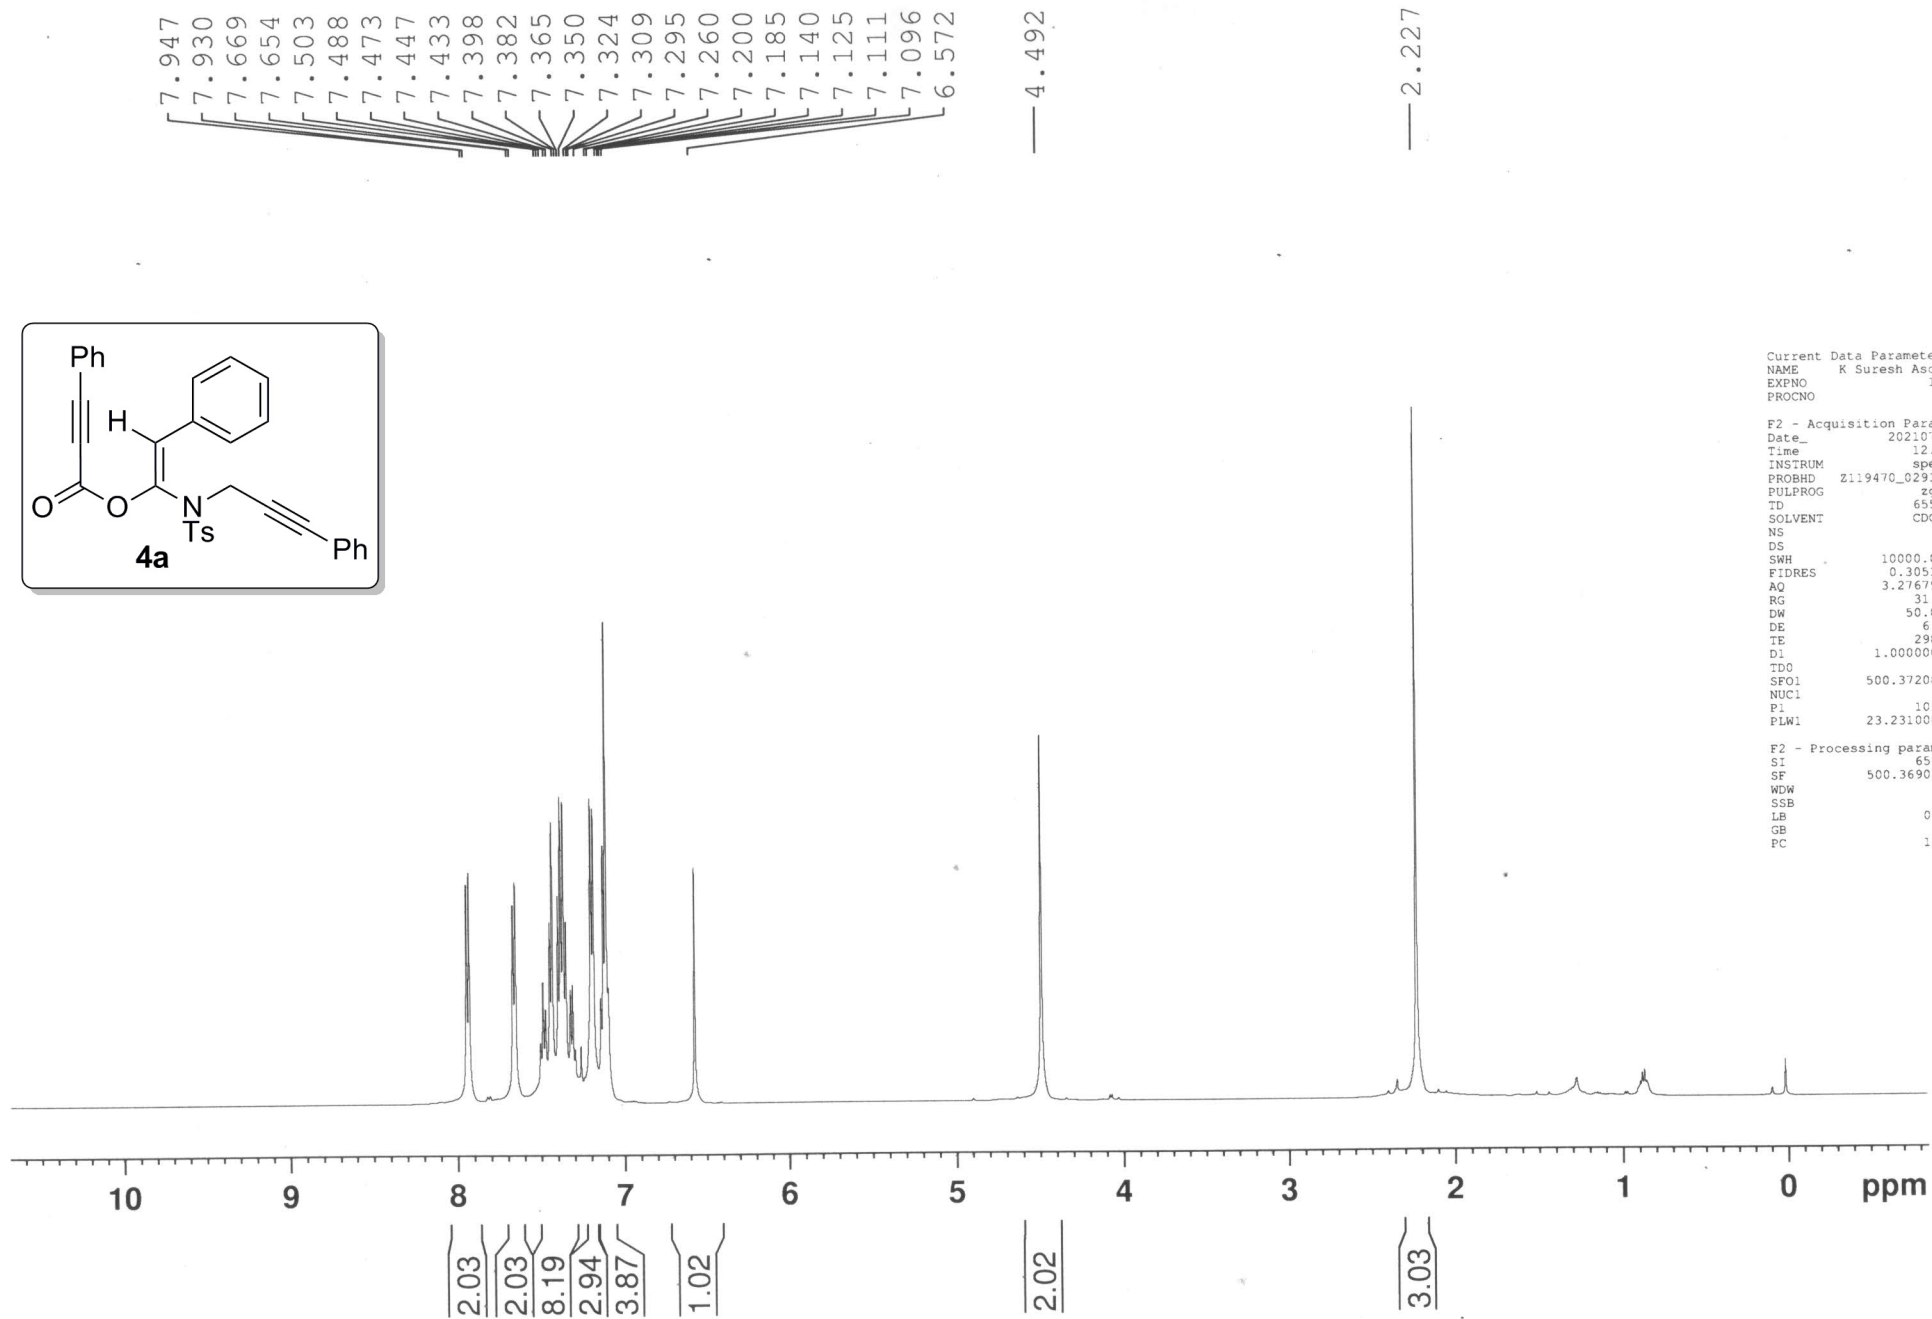

Current Data Parameters  
NAME K Suresh Ascend 500  
EXPNO 129  
PROCNO 1

F2 - Acquisition Parameters  
Date\_ 20210729  
Time 12.51 h  
INSTRUM spect  
PROBHD Z119470\_0291 ( )  
PULPROG zg30  
TD 65536  
SOLVENT CDCl3  
NS 16  
DS 2  
SWH 10000.000 Hz  
FIDRES 0.305176 Hz  
AQ 3.2767999 sec  
RG 31.25  
DW 50.000 usec  
DE 6.50 usec  
TE 298.1 K  
D1 1.0000000 sec  
TD0 1  
SF01 500.3720898 MHz  
NUC1 1H  
P1 10.00 usec  
PLW1 23.23100090 W

F2 - Processing parameters  
SI 65536  
SF 500.3690117 MHz  
WDW EM  
SSB 0  
LB 0.30 Hz  
GB 0  
PC 1.00

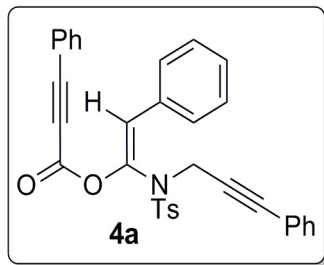

151.13  
144.07  
137.30  
136.20  
132.92  
131.56  
131.02  
129.30  
128.86  
128.71  
128.67  
128.59  
128.21  
127.87  
123.28  
122.17  
119.05

89.01  
85.91  
82.07  
79.82  
77.32\*  
77.00\*  
76.68\*

— 40.00

— 21.35

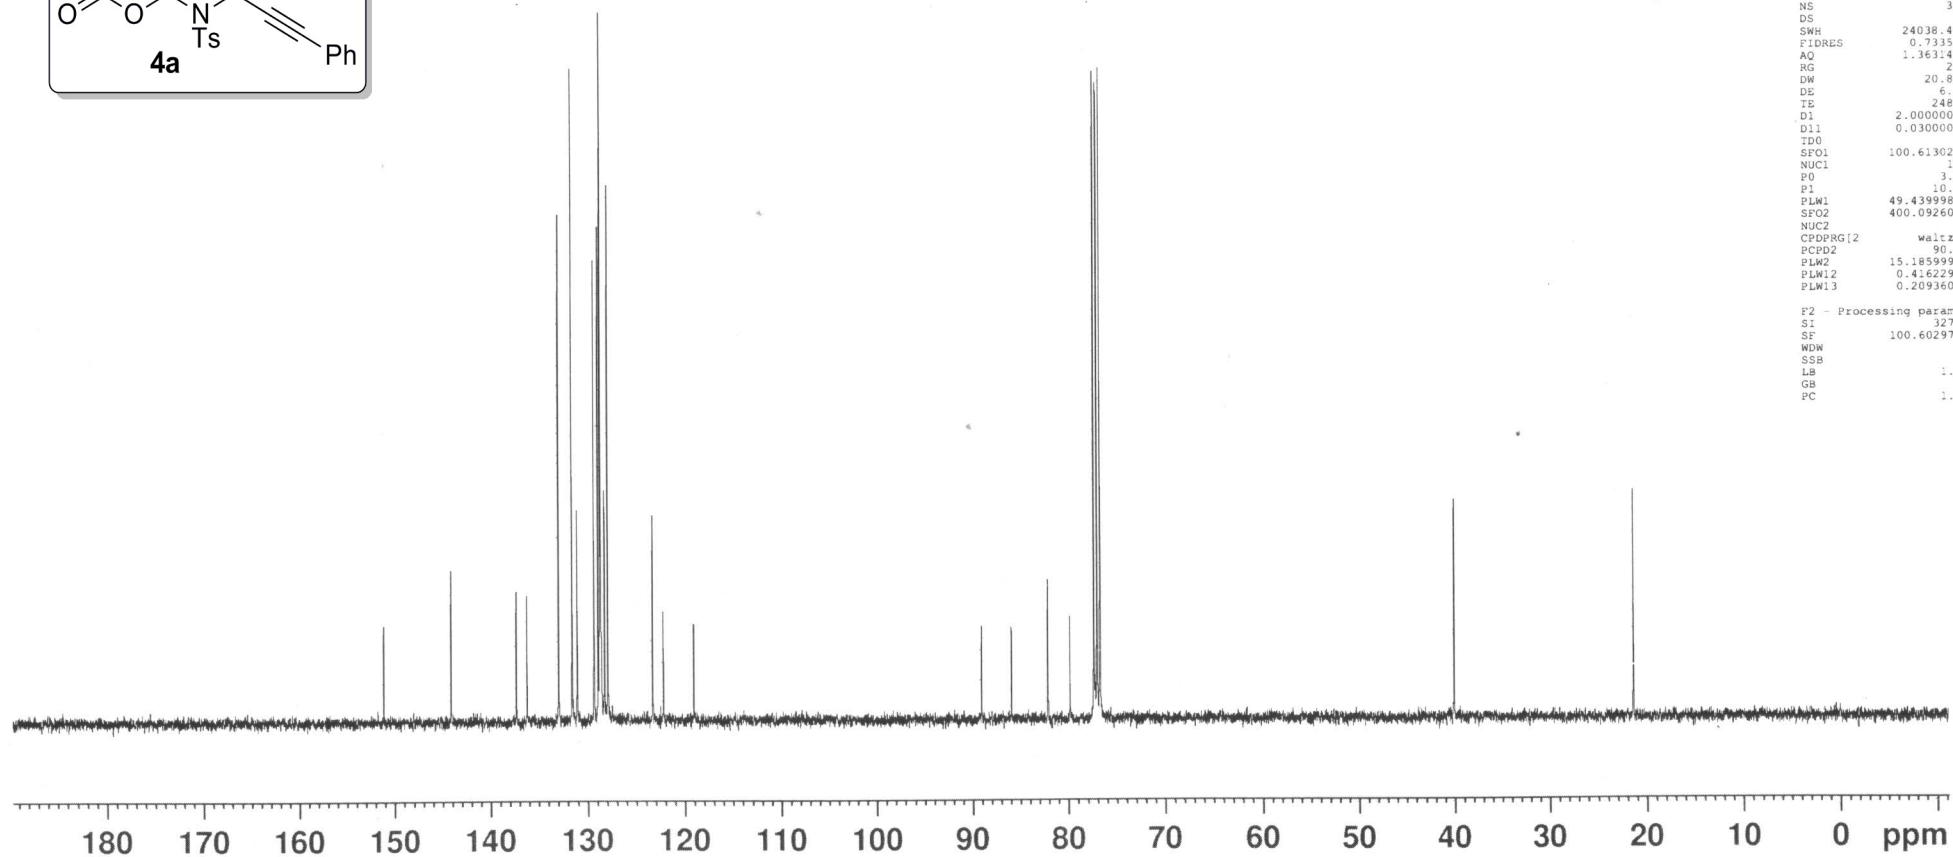

```

Current Data Parameters
NAME      K SURESH UPDATED 400
EXPNO     86
PROCNO    1

F2 - Acquisition Parameters
Date_     20210729
Time      10.43 h
INSTRUM   spect
PROBHD    Z106618_0098 1
PULPROG   zgpg30
TD         65536
SOLVENT   CDCl3
NS         310
DS         4
SWH        24038.461 Hz
FIDRES     0.733596 Hz
AQ         1.3631486 sec
RG         203
DW         20.800 usec
DE         6.50 usec
TE         248.2 K
D1         2.00000000 sec
D11        0.03000000 sec
TD0        1
SFO1       100.6130223 MHz
NUC1       13C
P0         3.33 usec
P1         10.00 usec
PLW1       49.4399863 W
SFO2       400.0926004 MHz
NUC2       1H
CPDPRG[2] waltz65
PCPD2      90.00 usec
PLW2       15.1859987 W
PLW12      0.41622999 W
PLW13      0.20936000 W

F2 - Processing parameters
SI         32768
SF         100.6029722 MHz
WDW        EM
SSB        0
LB         1.00 Hz
GB         0
PC         1.40

```

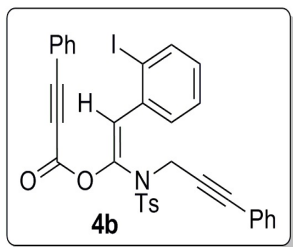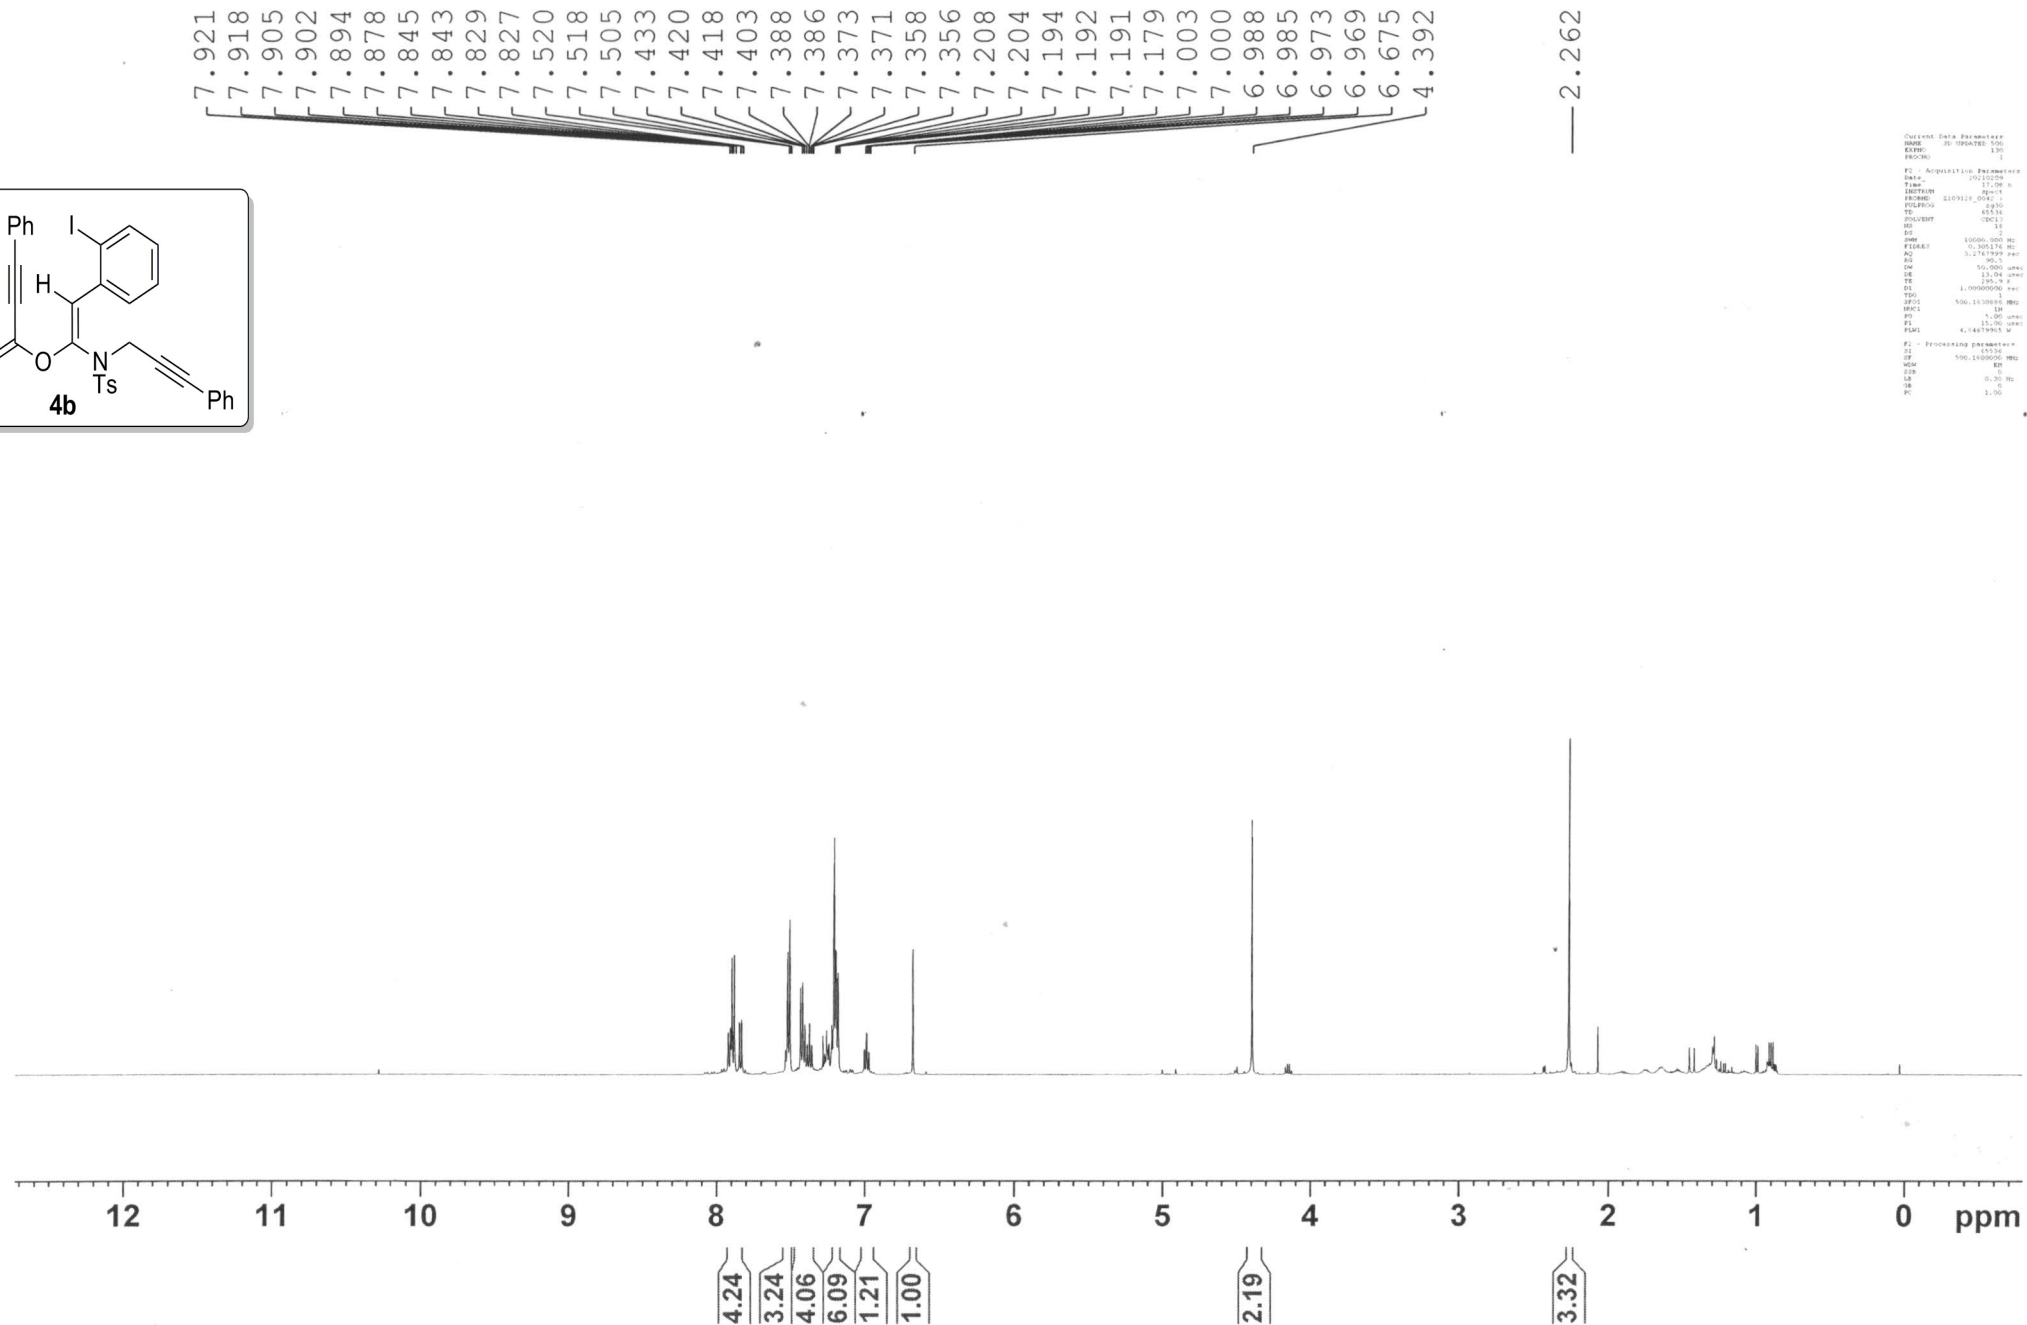

Original Data Parameters  
 NAME: 20100209  
 EXPNO: 2  
 PROCNO: 210912F\_002  
 F2 - Acquisition Parameters  
 Date\_: 20100209  
 Time: 11:08:00  
 INSTRUM: spect  
 PROCNO: 210912F\_002  
 PULPROG: zgpg30  
 TD: 65536  
 SFO: 500.136  
 AQ: 1.00000000  
 DE: 13.04 uPa  
 TE: 300.2 K  
 D1: 1.00000000  
 D2: 0.20000000  
 D3: 0.20000000  
 D4: 0.20000000  
 D5: 0.20000000  
 D6: 0.20000000  
 D7: 0.20000000  
 D8: 0.20000000  
 D9: 0.20000000  
 D10: 0.20000000  
 D11: 0.20000000  
 D12: 0.20000000  
 D13: 0.20000000  
 D14: 0.20000000  
 D15: 0.20000000  
 D16: 0.20000000  
 D17: 0.20000000  
 D18: 0.20000000  
 D19: 0.20000000  
 D20: 0.20000000  
 D21: 0.20000000  
 D22: 0.20000000  
 D23: 0.20000000  
 D24: 0.20000000  
 D25: 0.20000000  
 D26: 0.20000000  
 D27: 0.20000000  
 D28: 0.20000000  
 D29: 0.20000000  
 D30: 0.20000000  
 D31: 0.20000000  
 D32: 0.20000000  
 D33: 0.20000000  
 D34: 0.20000000  
 D35: 0.20000000  
 D36: 0.20000000  
 D37: 0.20000000  
 D38: 0.20000000  
 D39: 0.20000000  
 D40: 0.20000000  
 D41: 0.20000000  
 D42: 0.20000000  
 D43: 0.20000000  
 D44: 0.20000000  
 D45: 0.20000000  
 D46: 0.20000000  
 D47: 0.20000000  
 D48: 0.20000000  
 D49: 0.20000000  
 D50: 0.20000000  
 D51: 0.20000000  
 D52: 0.20000000  
 D53: 0.20000000  
 D54: 0.20000000  
 D55: 0.20000000  
 D56: 0.20000000  
 D57: 0.20000000  
 D58: 0.20000000  
 D59: 0.20000000  
 D60: 0.20000000  
 D61: 0.20000000  
 D62: 0.20000000  
 D63: 0.20000000  
 D64: 0.20000000  
 D65: 0.20000000  
 D66: 0.20000000  
 D67: 0.20000000  
 D68: 0.20000000  
 D69: 0.20000000  
 D70: 0.20000000  
 D71: 0.20000000  
 D72: 0.20000000  
 D73: 0.20000000  
 D74: 0.20000000  
 D75: 0.20000000  
 D76: 0.20000000  
 D77: 0.20000000  
 D78: 0.20000000  
 D79: 0.20000000  
 D80: 0.20000000  
 D81: 0.20000000  
 D82: 0.20000000  
 D83: 0.20000000  
 D84: 0.20000000  
 D85: 0.20000000  
 D86: 0.20000000  
 D87: 0.20000000  
 D88: 0.20000000  
 D89: 0.20000000  
 D90: 0.20000000  
 D91: 0.20000000  
 D92: 0.20000000  
 D93: 0.20000000  
 D94: 0.20000000  
 D95: 0.20000000  
 D96: 0.20000000  
 D97: 0.20000000  
 D98: 0.20000000  
 D99: 0.20000000  
 D100: 0.20000000  
 F2 - Processing parameters  
 SI: 32768  
 SF: 500.136000  
 NS: 65536  
 DS: 4  
 LB: 0.30 Hz  
 GB: 0  
 PC: 1.00

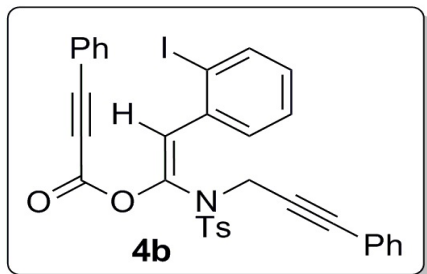

150.78  
144.04  
139.22  
138.95  
135.94  
133.00  
131.67  
131.09  
129.73  
129.35  
128.62  
128.45  
128.34  
127.93  
125.77  
122.19  
119.03  
100.22  
89.29  
85.94  
82.13  
79.75  
77.32  
77.00  
76.68

—40.19

—21.39

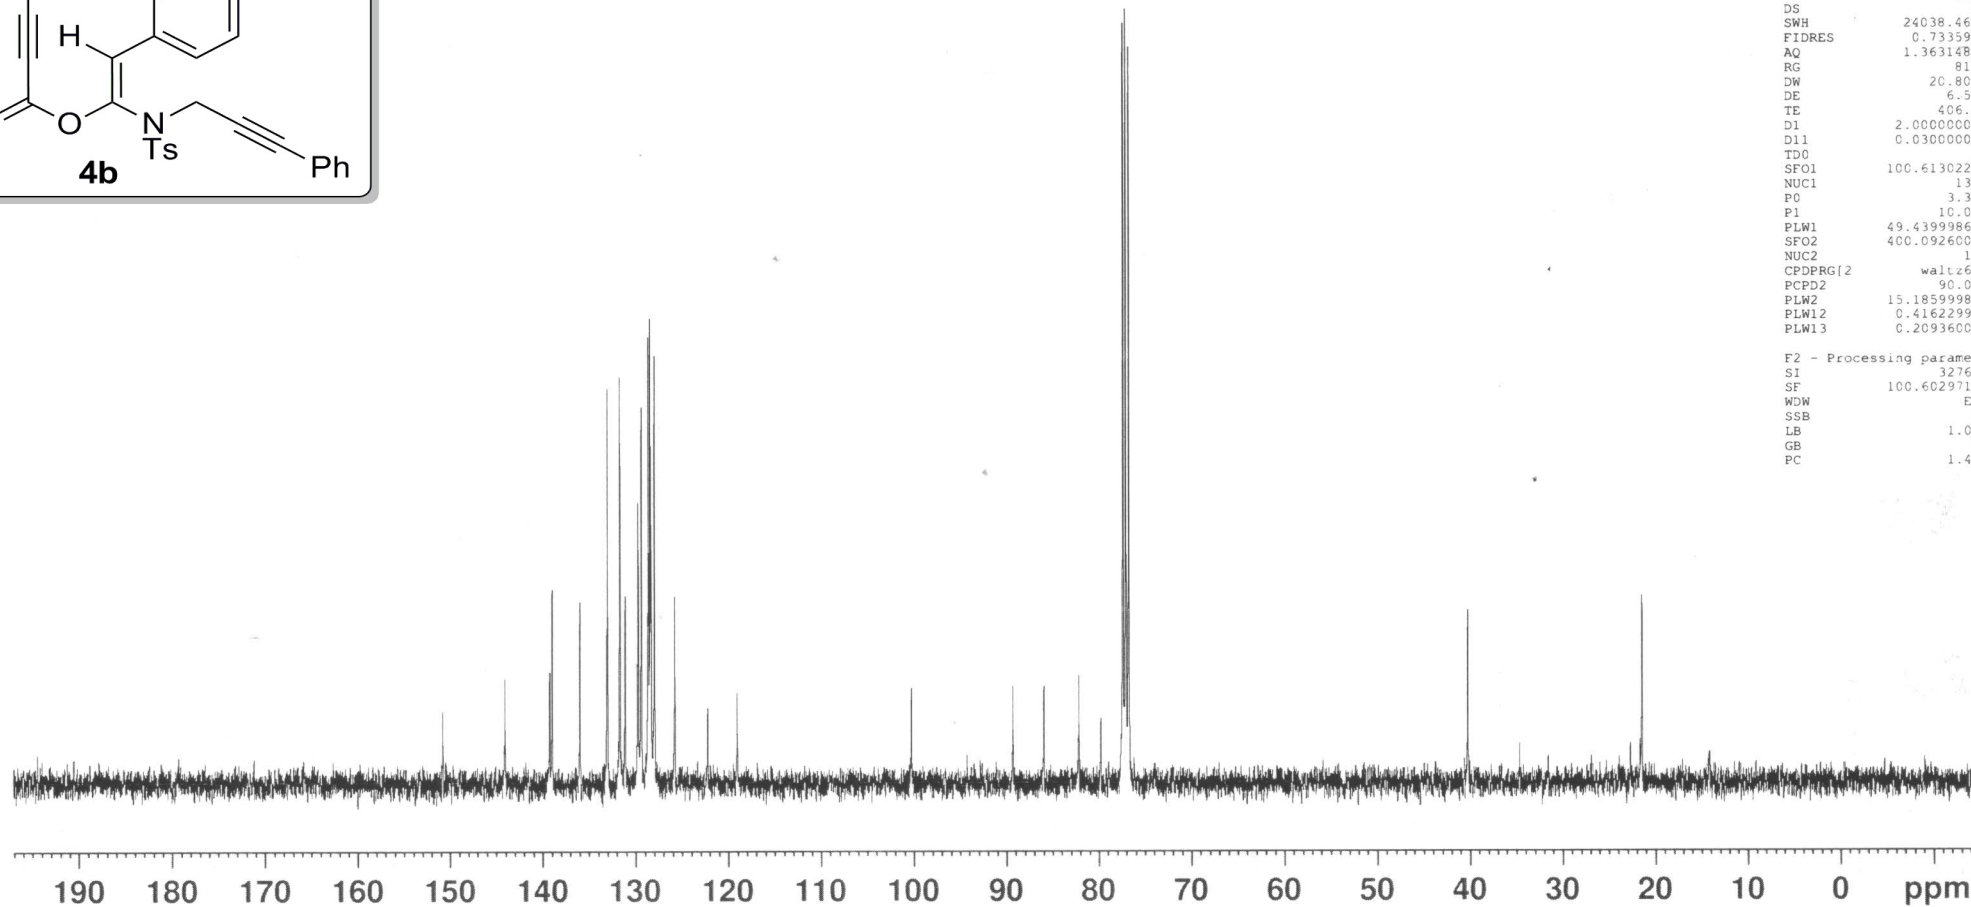

Current Data Parameters  
NAME SD UPDATED 400  
EXPNO 145  
PROCNO 1

F2 - Acquisition Parameters  
Date\_ 20210209  
Time 16.44 h  
INSTRUM spect  
PROBHD Z108618\_0098 ( 812  
PULPROG zgpg30  
TD 65536  
SOLVENT CDCl3  
NS 256  
DS 4  
SWH 24038.461 Hz  
FIDRES 0.733596 Hz  
AQ 1.3631488 sec  
RG 812  
DW 20.800 usec  
DE 6.50 usec  
TE 406.6 K  
D1 2.0000000 sec  
D11 0.0300000 sec  
TD0 1  
SFO1 100.6130223 MHz  
NUC1 13C  
PC 3.33 usec  
P1 10.00 usec  
PLW1 49.43999863 W  
SFO2 400.0926004 MHz  
NUC2 1H  
CPDPRG[2] waltz65  
PCPD2 90.00 usec  
PLW2 15.18599987 W  
PLW12 0.41622999 W  
PLW13 0.20936000 W

F2 - Processing parameters  
SI 32768  
SF 100.6029719 MHz  
WDW EM  
SSB 0  
LB 1.00 Hz  
GB 0  
PC 1.40

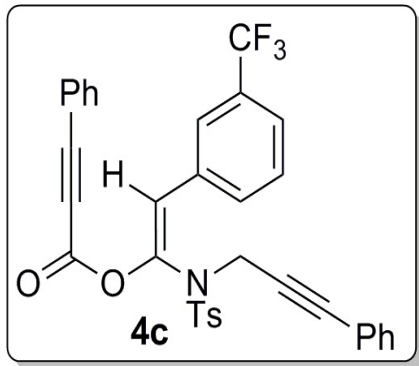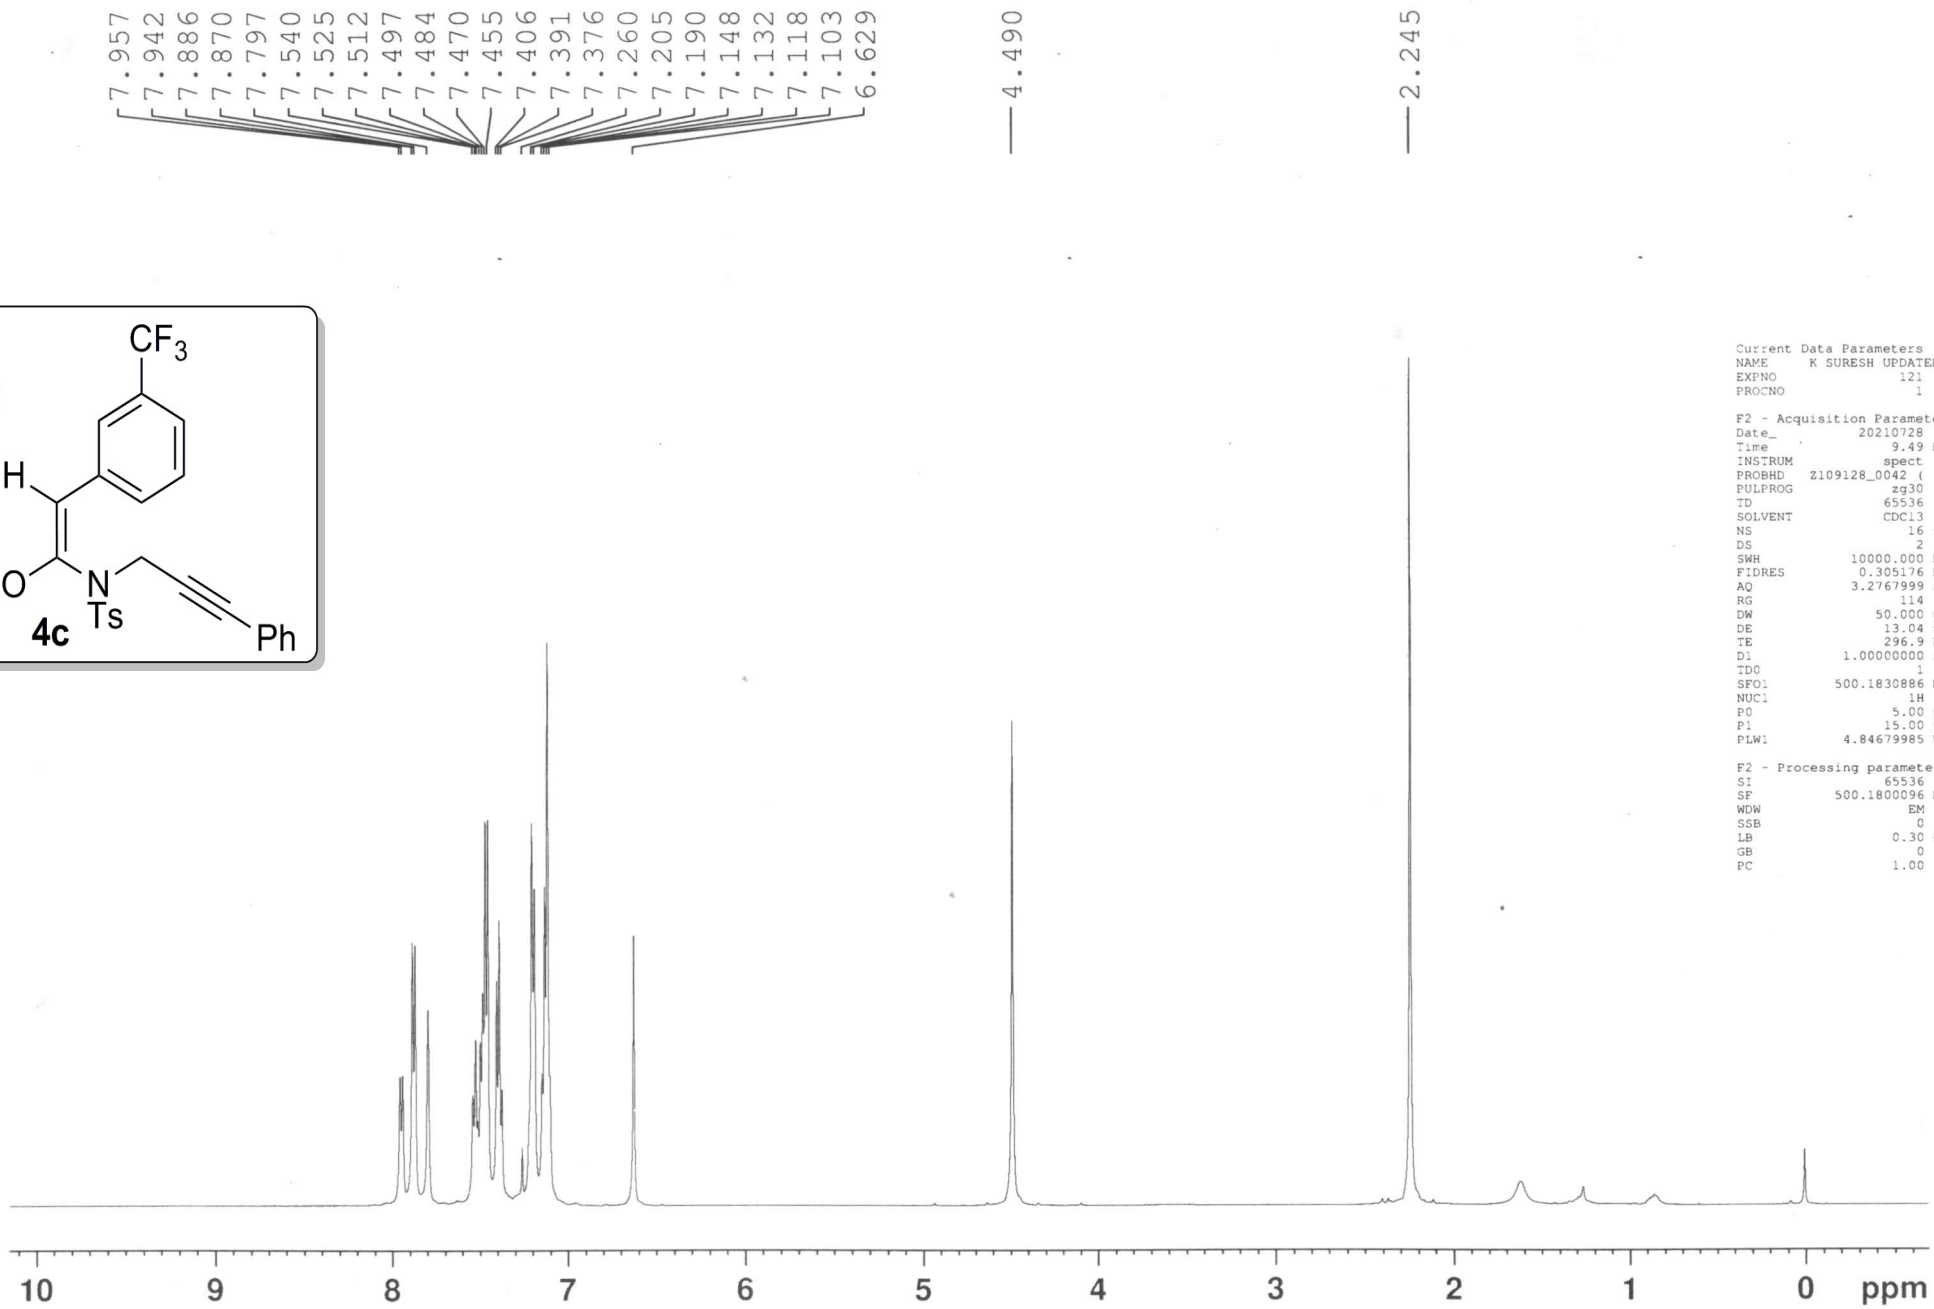

Current Data Parameters  
 NAME K SURESH UPDATED 500  
 EXPNO 121  
 PROCNO 1

F2 - Acquisition Parameters  
 Date\_ 20210728  
 Time 9.49 h  
 INSTRUM spect  
 PROBHD Z109128\_0042 ( )  
 PULPROG zg30  
 TD 65536  
 SOLVENT cdcl3  
 NS 16  
 DS 2  
 SWH 10000.000 Hz  
 FIDRES 0.305176 Hz  
 AQ 3.2767999 sec  
 RG 114  
 DW 50.000 usec  
 DE 13.04 usec  
 TE 296.9 K  
 D1 1.0000000 sec  
 TDC 1  
 SFO1 500.1830886 MHz  
 NUC1 1H  
 P0 5.00 usec  
 F1 15.00 usec  
 PLW1 4.84679985 W

F2 - Processing parameters  
 SI 65536  
 SF 500.1800096 MHz  
 WDW EM  
 SSB 0  
 LB 0.30 Hz  
 GB 0  
 PC 1.00



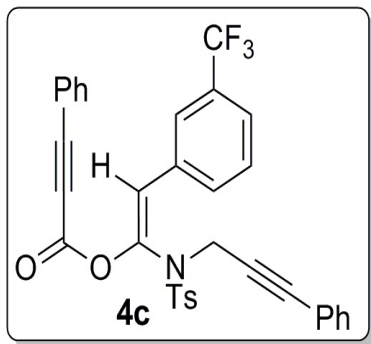

150.87  
144.37  
138.54  
135.79  
133.02  
132.72  
131.71  
131.60  
131.30  
131.16  
131.01  
130.76  
130.51  
129.44  
129.11  
128.64  
128.62  
128.40  
127.96  
125.93  
125.90  
125.87  
125.84  
125.14  
124.97  
122.80  
122.22  
122.02  
118.98  
89.41  
86.28  
81.62  
79.67  
77.26  
77.00  
76.75

—39.83

—21.37

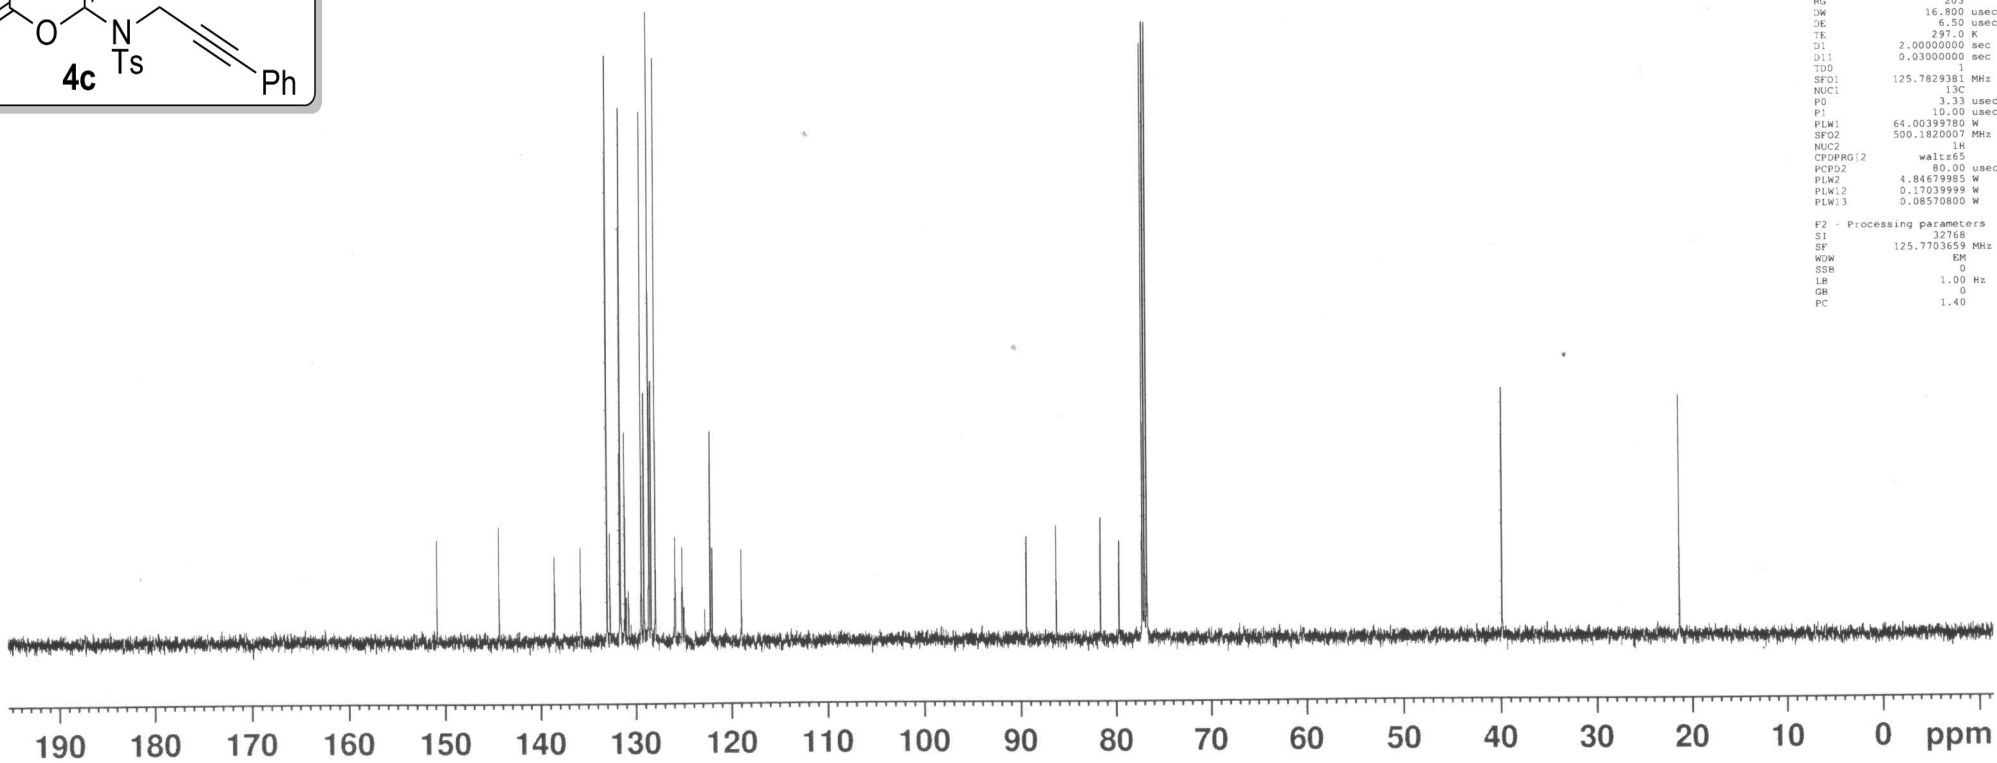

```

Current Data Parameters
NAME      K SURESH UPDATED 500
EXPNO    122
PROCNO   1

F2 - Acquisition Parameters
Date_    20210728
Time     10.02 h
INSTRUM  spect
PROBHD   Z109128_0042 (
PULPROG  zgpg30
TD       65536
SOLVENT  CDCl3
NS       235
DS       4
SWH      29761.904 Hz
FIDRES   0.908261 Hz
AQ       1.1010048 sec
RG       203
DW       16.800 usec
DE       6.50 usec
TE       297.0 K
D1       2.00000000 sec
d11      0.03000000 sec
TDD      1
SFO1     125.7829381 MHz
NUC1     13C
PU       3.33 usec
PI       10.00 usec
PLW1     64.00399780 W
SFO2     500.1820007 MHz
NUC2     1H
CPDPRG2  waltz65
PCPD2    80.00 usec
PLW2     4.84679985 W
PLW12    0.17039999 W
PLW13    0.08570800 W

F2 - Processing parameters
SI       32768
SF       125.7703659 MHz
WDW      EM
SSB      0
LB       1.00 Hz
GB       0
PC       1.40

```

— -62.79

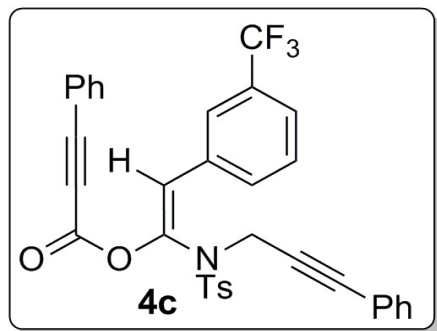

```
Current Data Parameters
NAME      K Suresh Ascend 500
EXPNO     126
PROCNO    1

F2 - Acquisition Parameters
Date_     20210728
Time      15.21 h
INSTRUM   spect
PROBHD    Z119470_0291 (
PULPROG   zgpg30
ID         131072
SOLVENT   CDCl3
NS         32
DS         4
SWH        113636.367 Hz
FIDRES     1.733953 Hz
AQ         0.5767168 sec
RG         7.96
DW         4.400 usec
DE         6.50 usec
TE         298.6 K
D1         1.00000000 sec
D11        0.03000000 sec
D12        0.00002000 sec
TD0        1
SFO1       470.7701802 MHz
NUC1       19F
P1         15.00 usec
PLW1       45.84600067 W
SFO2       500.3710015 MHz
NUC2       1H
CPDPRG2    waltz16
PCPD2      80.00 usec
PLW2       23.23100090 W
PLW12      0.36298999 W

F2 - Processing parameters
SI         65536
SF         470.8172619 MHz
WDW        EM
SSB        0
LB         0.30 Hz
GB         0
PC         1.00
```

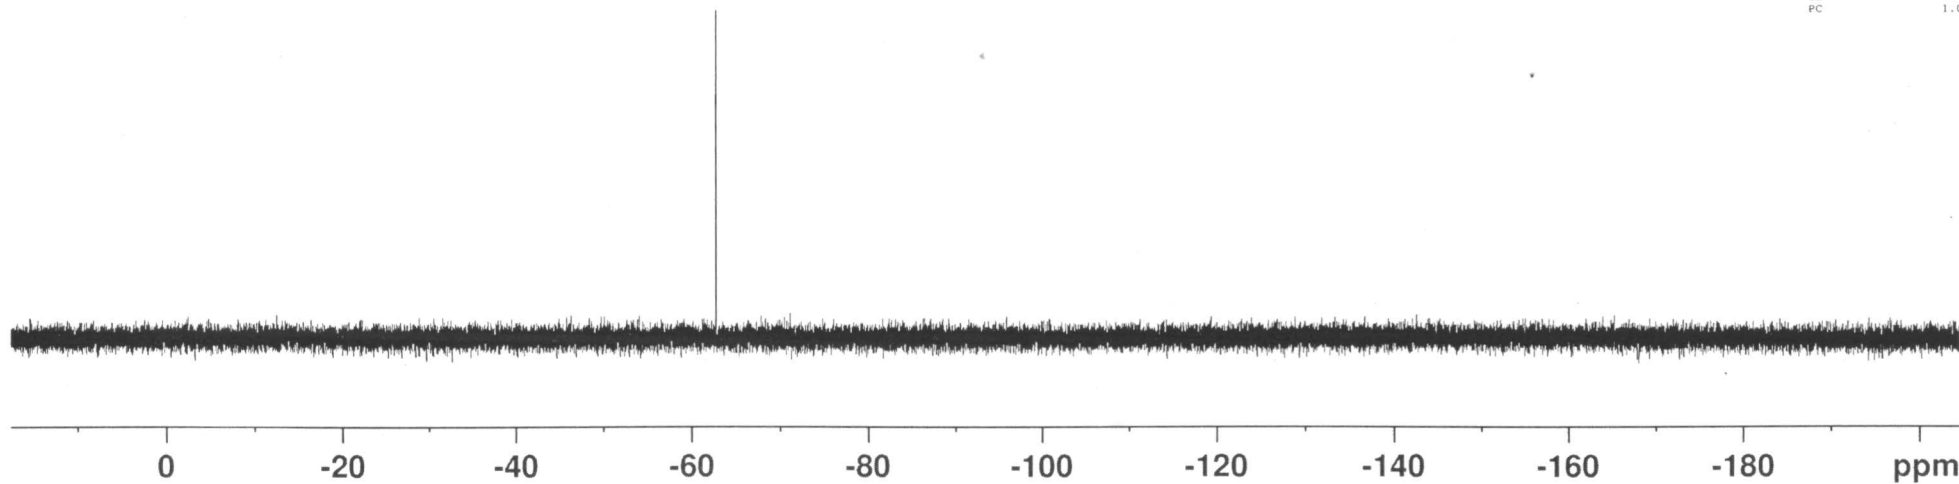

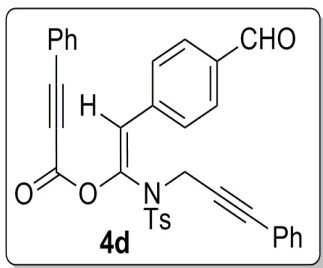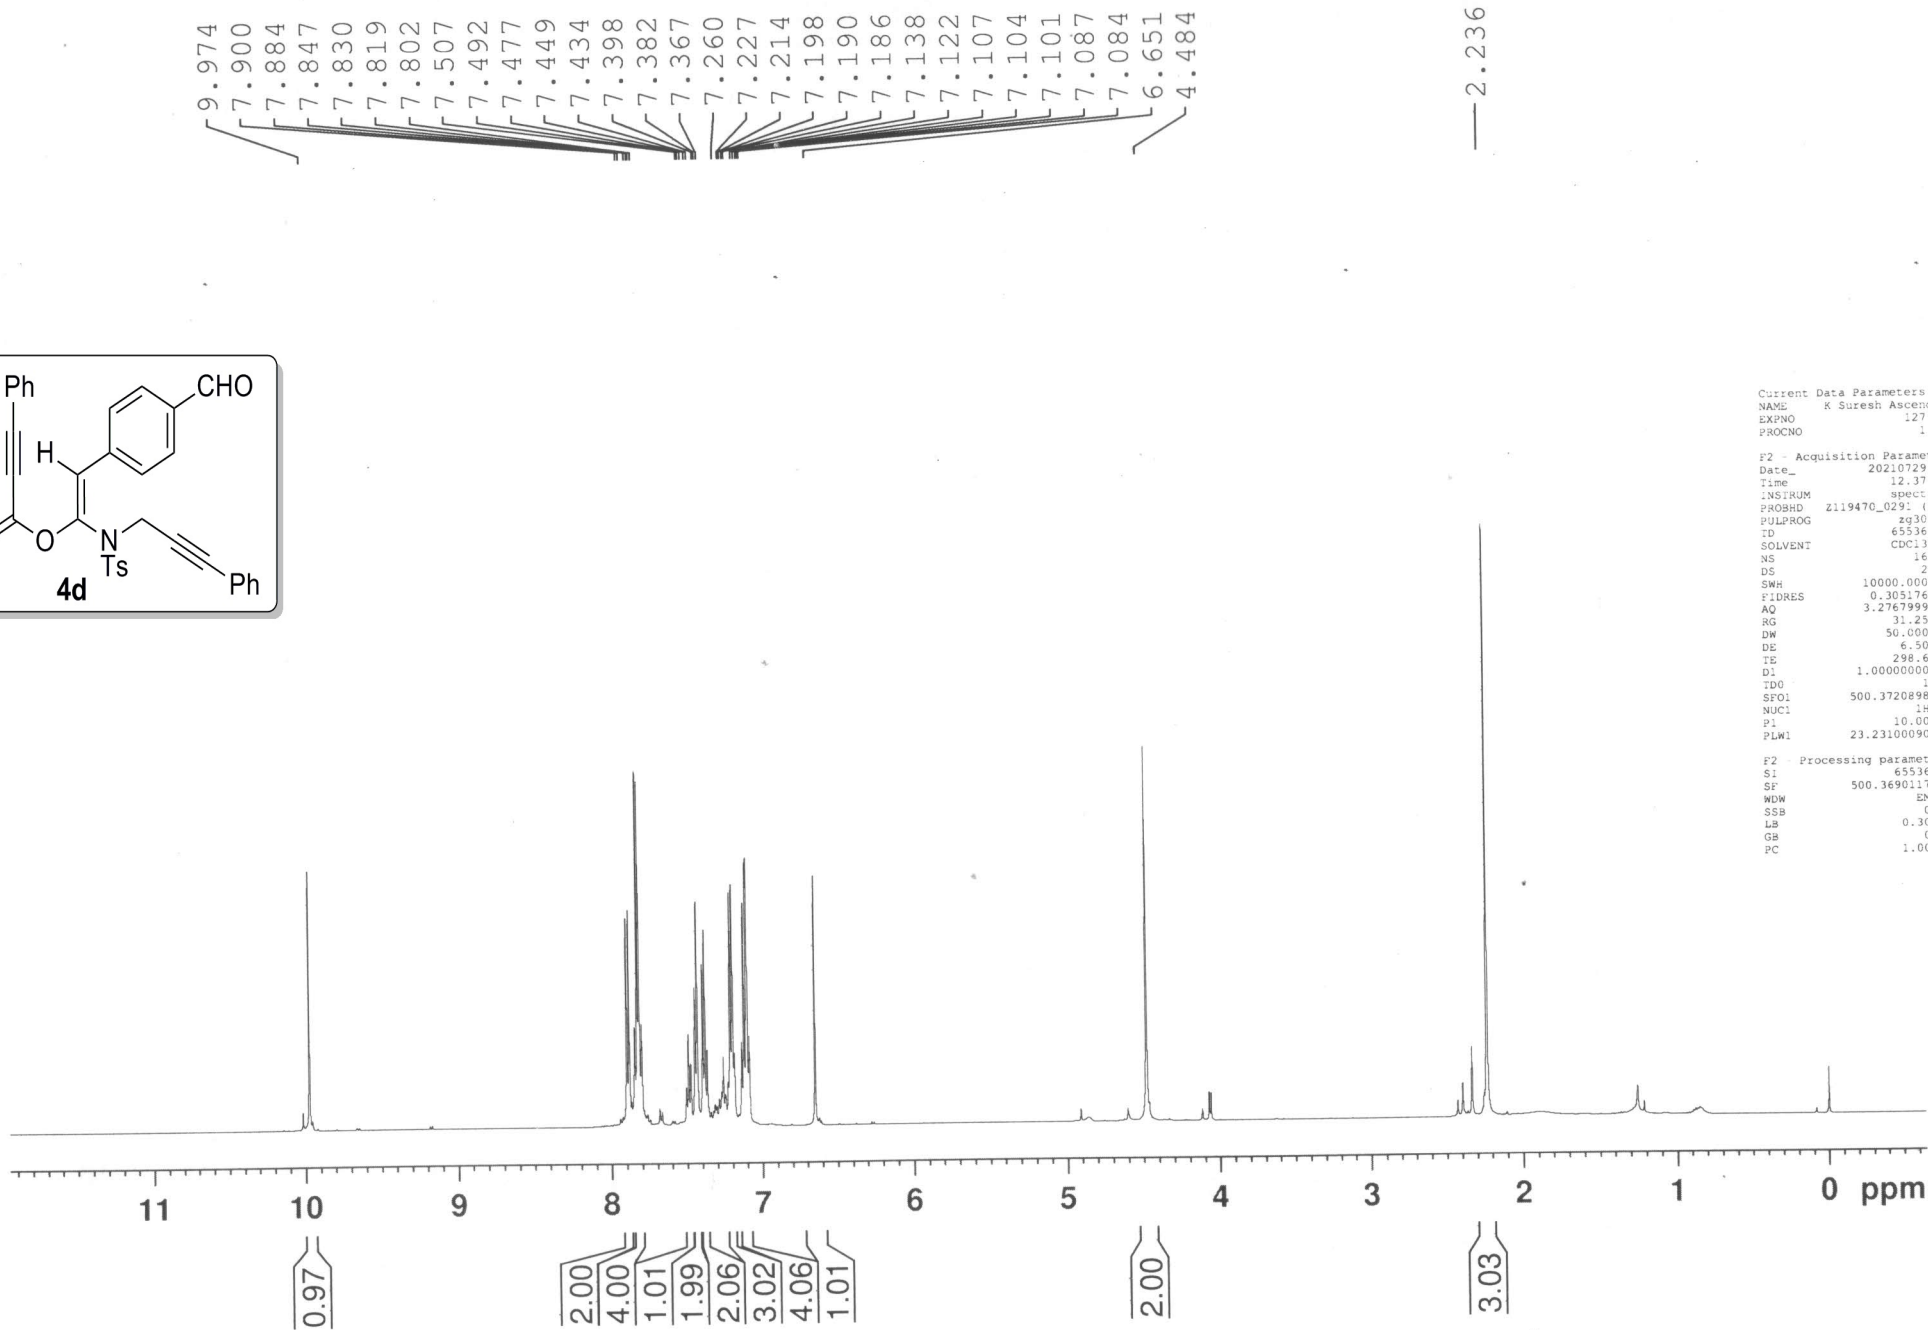

Current Data Parameters  
 NAME K Suresh Ascend 500  
 EXPNO 127  
 PROCNO 1

F2 - Acquisition Parameters  
 Date\_ 20210729  
 Time 12.37 h  
 INSTRUM spect  
 PROBHD Z119470\_0291 f  
 PULPROG zg30  
 ID 65536  
 SOLVENT CDCl3  
 NS 16  
 DS 2  
 SWH 10000.000 Hz  
 FIDRES 0.305176 Hz  
 AQ 3.2767999 sec  
 RG 31.25  
 DW 50.000 usec  
 DE 6.50 usec  
 TE 298.6 K  
 D1 1.00000000 sec  
 TD0 1  
 SFO1 500.3720898 MHz  
 NUC1 1H  
 P1 10.00 usec  
 PLW1 23.23100090 W

F2 - Processing parameters  
 SI 65536  
 SF 500.3690117 MHz  
 WDW EM  
 SSB 0  
 LB 0.30 Hz  
 GB 0  
 PC 1.00

— 191.56

150.71  
144.40  
139.21  
138.00  
135.88  
135.78  
132.97  
131.53  
131.19  
129.81  
129.44  
129.38  
128.62  
128.57  
128.41  
127.95  
122.20  
121.94  
118.84

89.48  
86.27  
81.62  
79.56  
77.26  
77.00  
76.75

— 39.98

— 21.36

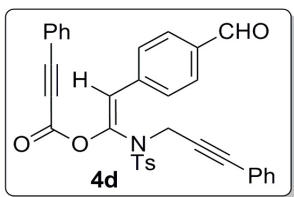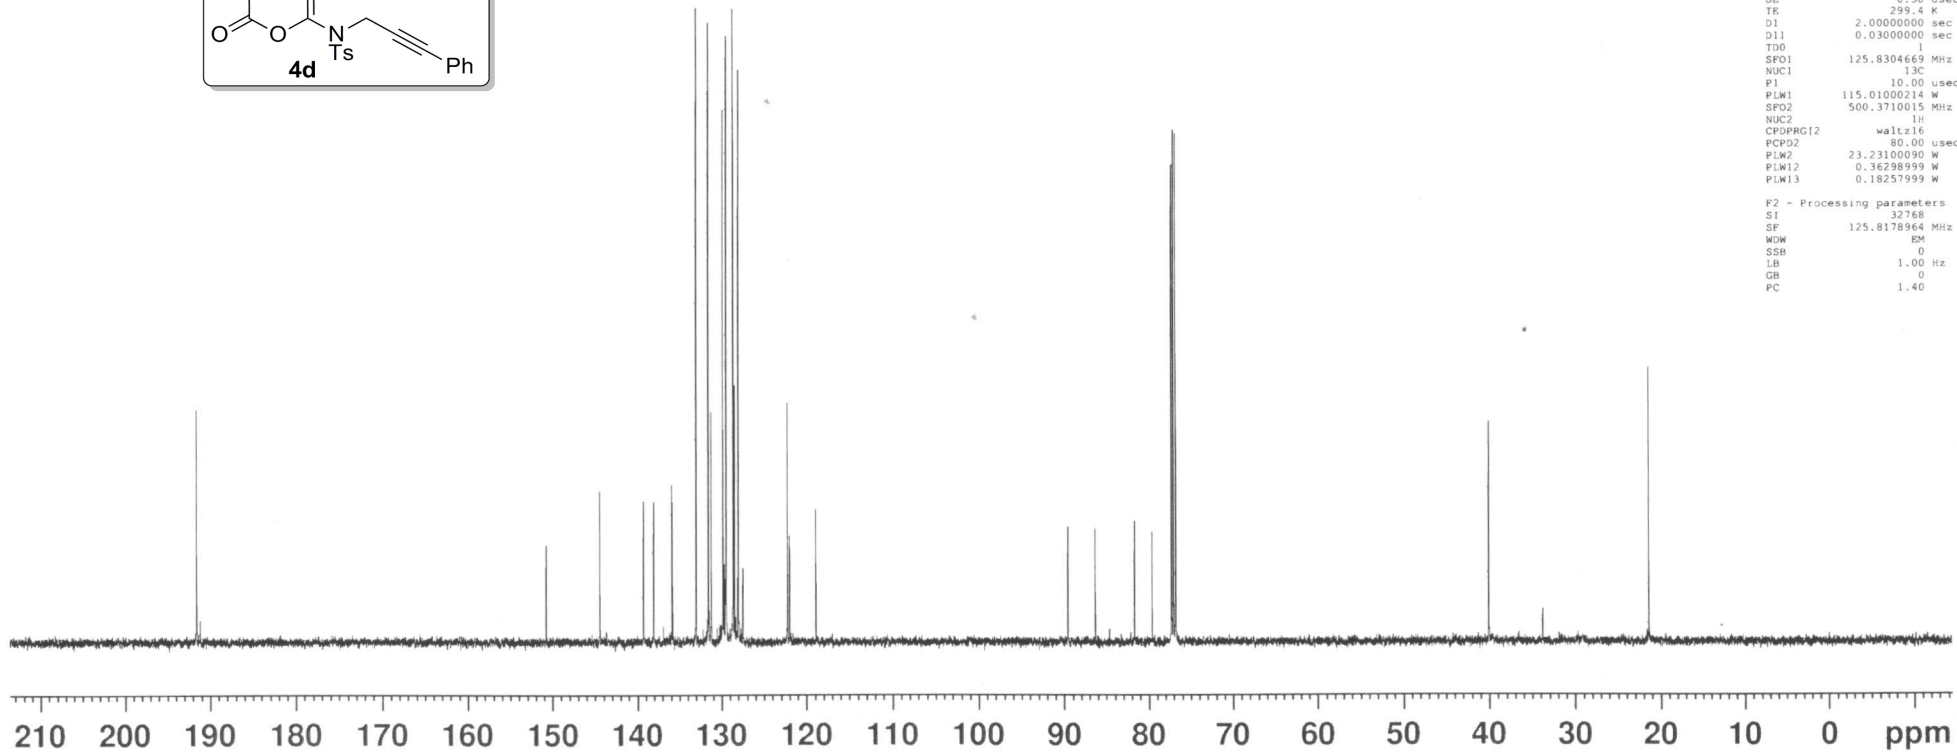

Current Data Parameters  
NAME K Suresh Ascend 500  
EXPNO 128  
PROCNO 1

F2 - Acquisition Parameters  
Date\_ 20210729  
Time 12:47 h  
INSTRUM spect  
PROBHD Z119470\_0291 (r  
PULPROG zgpg30  
TD 65536  
SOLVENT CDCl3  
NS 161  
DS 4  
SWH 29761.904 Hz  
FIDRES 0.908261 Hz  
AQ 1.1010048 sec  
RG 192.83  
DW 16.800 usec  
DE 6.50 usec  
TE 299.4 K  
D1 2.00000000 sec  
D11 0.03000000 sec  
TDO 1  
SFO1 125.8304669 MHz  
NUC1 13C  
P1 10.00 usec  
PLW1 115.01000214 W  
SFO2 500.3710015 MHz  
NUC2 1H  
PCPDPRG12 waltz16  
PCPD2 80.00 usec  
PLW2 23.23100090 W  
PLW12 0.36298999 W  
PLW13 0.18257999 W

F2 - Processing parameters  
SI 32768  
SF 125.8178964 MHz  
WDW EM  
SSB 0  
LB 1.00 Hz  
GB 0  
PC 1.40

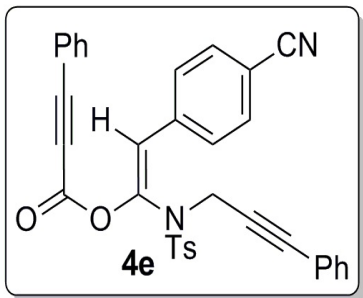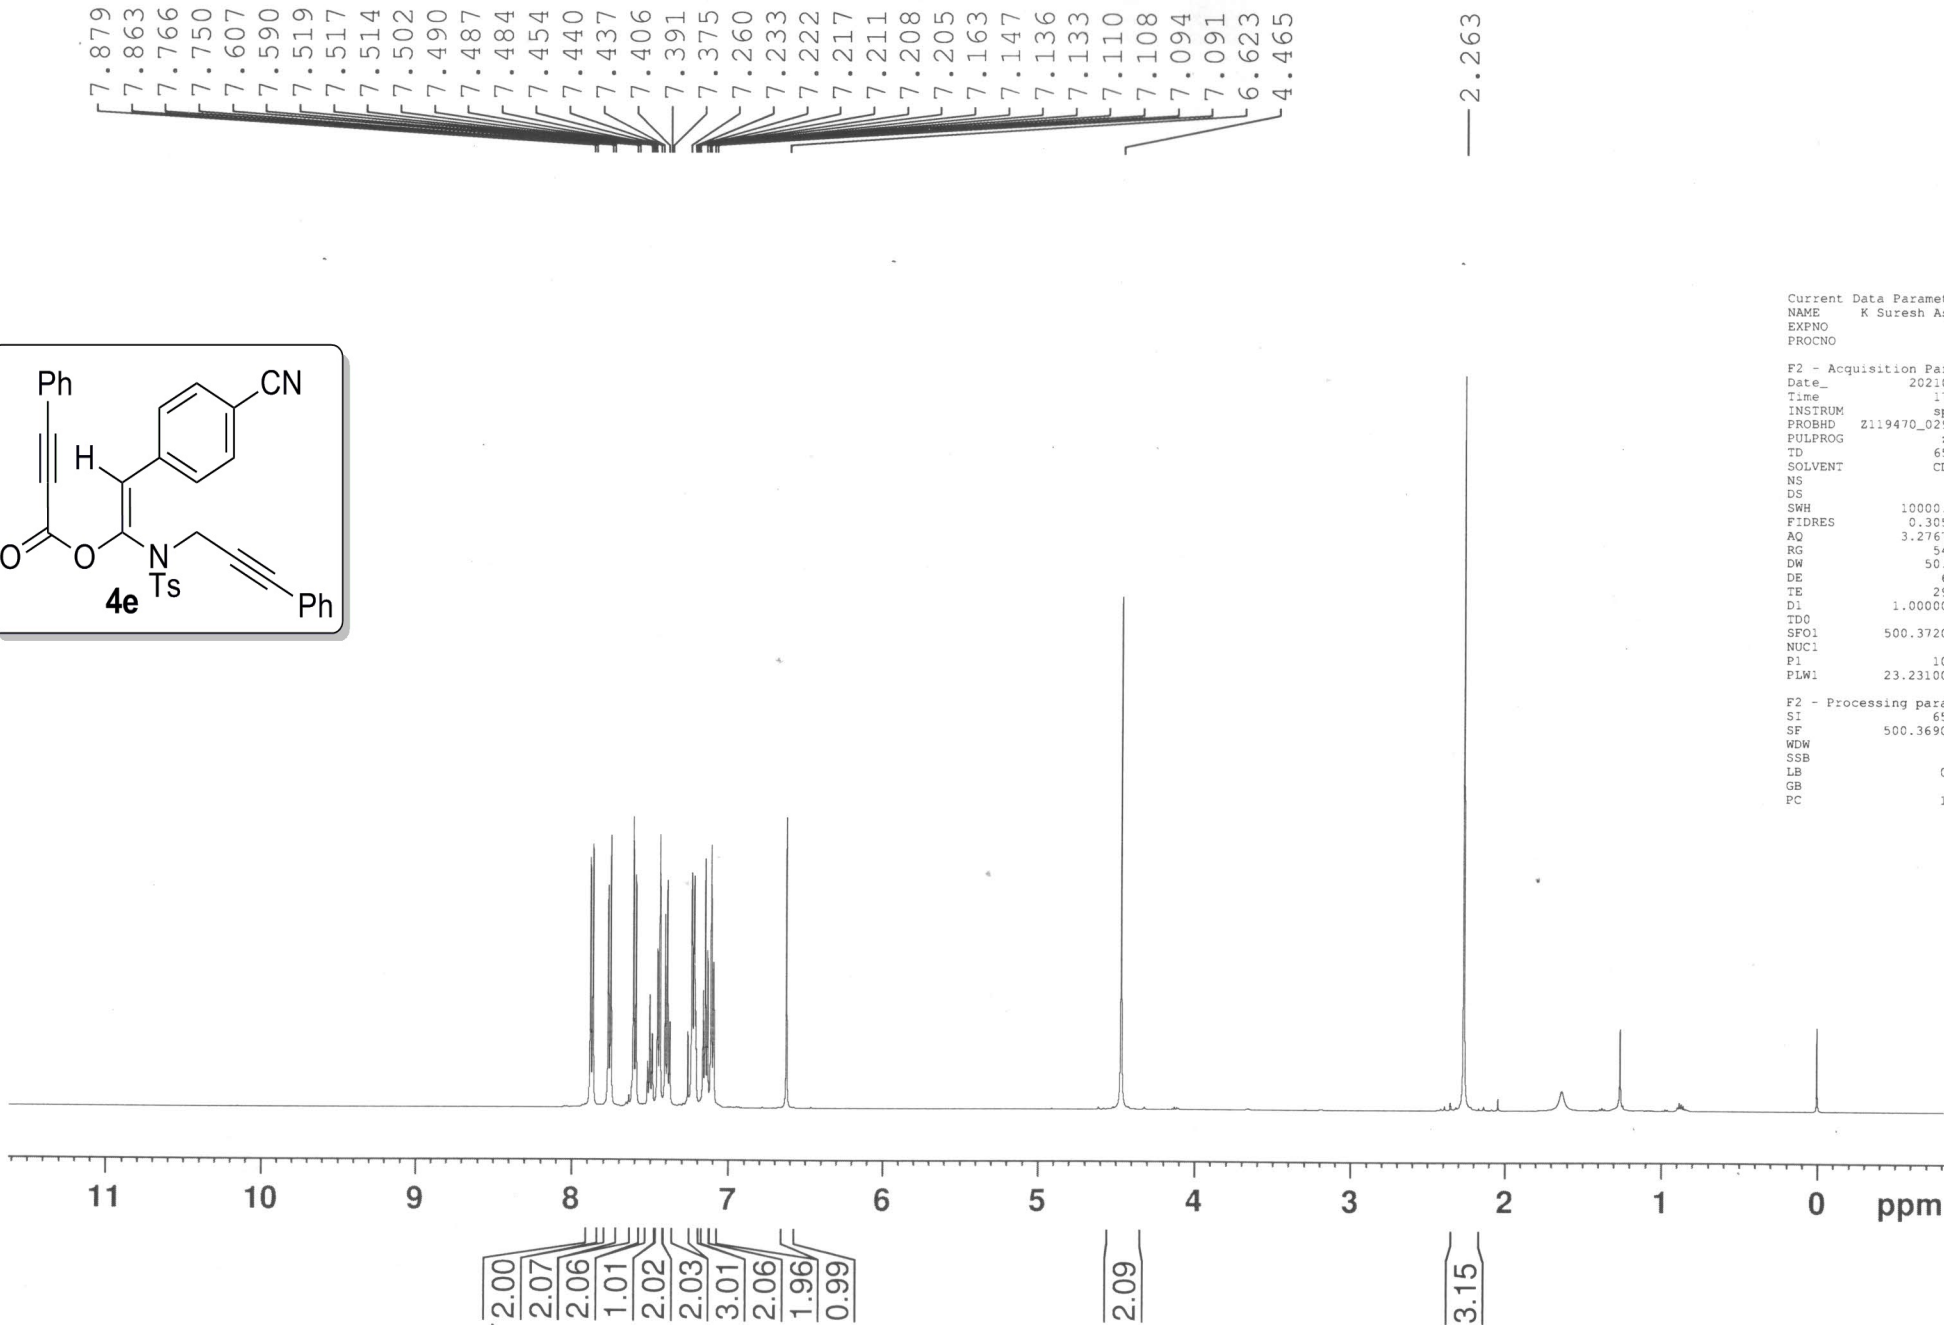

Current Data Parameters  
 NAME K Suresh Ascend 500  
 EXPNO 136  
 PROCNO 1

F2 - Acquisition Parameters  
 Date\_ 20210802  
 Time 17.52 h  
 INSTRUM spect  
 PROBHD z119470\_0291 ( )  
 PULPROG zg30  
 TD 65536  
 SOLVENT CDCl3  
 NS 16  
 DS 2  
 SWH 10000.000 Hz  
 FIDRES 0.305176 Hz  
 AQ 3.2767999 sec  
 RG 54.81  
 DW 50.000 usec  
 DE 6.50 usec  
 TE 298.9 K  
 D1 1.00000000 sec  
 TDO 1  
 SFO1 500.3720898 MHz  
 NUC1 1H  
 P1 10.00 usec  
 PLW1 23.23100090 W

F2 - Processing parameters  
 SI 65536  
 SF 500.3690118 MHz  
 WDW EM  
 SSB 0  
 LB 0.30 Hz  
 GB 0  
 PC 1.00

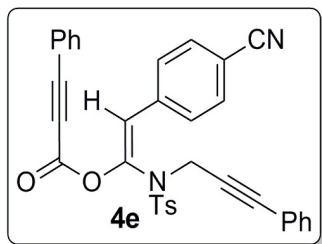

150.63  
144.55  
139.39  
136.66  
135.63  
133.01  
132.21  
131.53  
131.26  
129.50  
129.38  
128.66  
128.57  
128.03  
121.82  
118.80  
118.61  
111.79

89.61  
86.40  
81.44  
79.48  
77.32  
77.00  
76.68

— 39.93

— 21.41

Current Data Parameters  
NAME K SURESH UPDATED 400  
EXPNO 88  
PROCNO 1

F2 - Acquisition Parameters  
Date\_ 20210802  
Time 16.21 h  
INSTRUM spect  
PROBHD Z108618\_0098 (  
PULPROG zgpg30  
TD 65536  
SOLVENT CDC13  
NS 475  
DS 4  
SWH 24038.461 Hz  
FIDRES 0.733596 Hz  
AQ 1.3631488 sec  
RG 812  
DW 20.800 usec  
DE 6.50 usec  
TE -1634.2 K  
D1 2.0000000 sec  
D11 0.0300000 sec  
TD0 1  
SFO1 100.6130223 MHz  
NUC1 13C  
PO 3.33 usec  
P1 10.00 usec  
PLW1 49.43999863 W  
SFO2 400.0926004 MHz  
NUC2 1H  
CPDPRG[2] waltz65  
PCPD2 90.00 usec  
PLW2 15.1859987 W  
PLW12 0.41622999 W  
PLW13 0.20936000 W

F2 - Processing parameters  
SI 32768  
SF 100.6029714 MHz  
WDW EM  
SSB 0  
LB 1.00 Hz  
GB 0  
PC 1.40

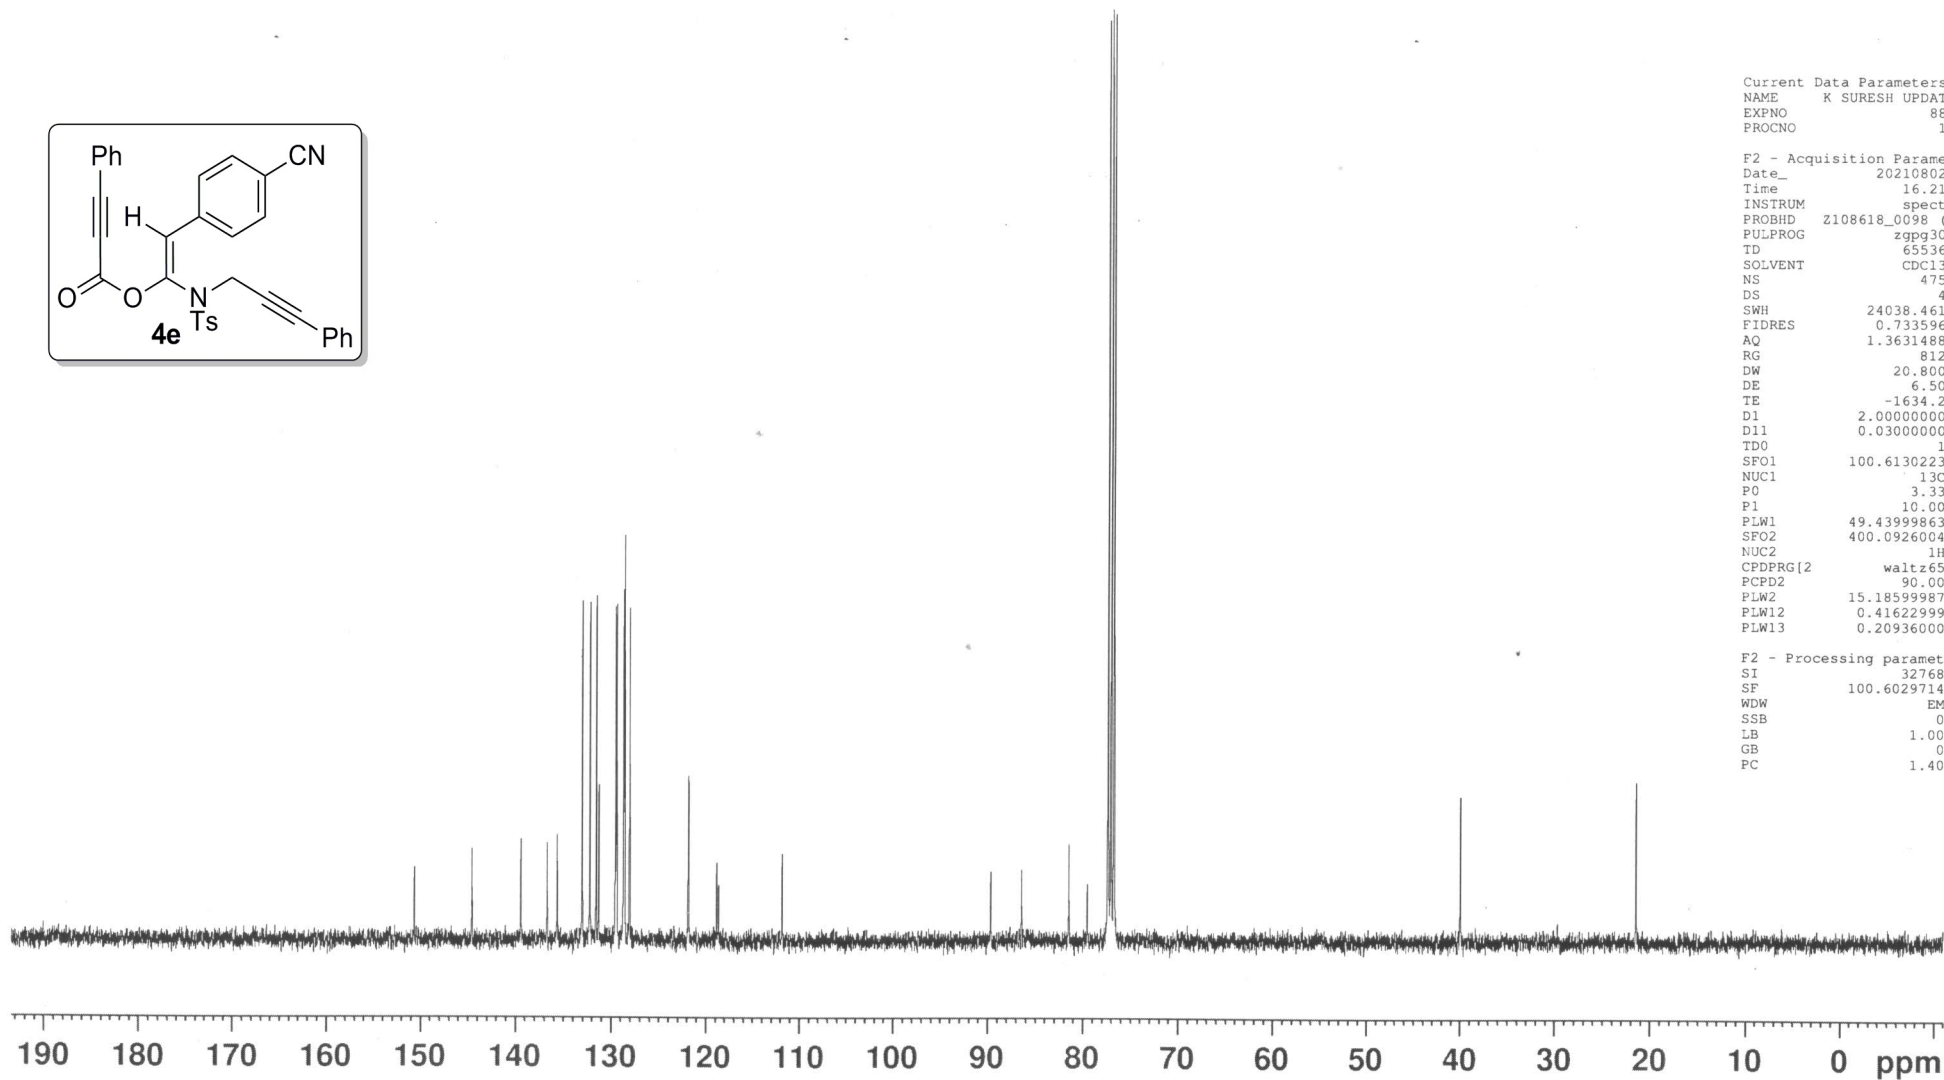

7.935  
7.918  
7.652  
7.637  
7.518  
7.514  
7.510  
7.505  
7.500  
7.497  
7.490  
7.486  
7.482  
7.431  
7.427  
7.424  
7.414  
7.409  
7.394  
7.376  
7.373  
7.359  
7.344  
7.321  
7.318  
7.311  
7.306  
7.301  
7.294  
7.292  
7.282  
7.278  
7.260  
7.214  
7.198  
7.084  
7.080  
7.076  
7.067  
7.063  
7.059  
7.008  
7.003  
7.000  
6.990  
6.986  
6.556  
4.469  
2.250

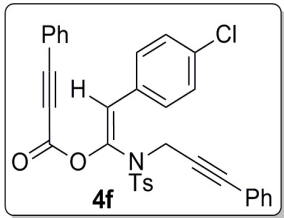

Current Data Parameters  
NAME RP\_UPDATED\_500  
EXPNO 44  
PROCNO 1

F2 - Acquisition Parameters  
Date\_ 20210803  
Time 9.48 h  
INSTRUM spect  
PROBHD z109128\_0042 (zg30)  
PULPROG zg30  
TD 65536  
SOLVENT CDCl3  
NS 16  
DS 2  
SWH 10000.000 Hz  
FIDRES 0.305176 Hz  
AQ 3.2767999 sec  
RG 90.5  
DW 50.000 usec  
DE 13.04 usec  
TE 297.6 K  
D1 1.00000000 sec  
TDO 1  
SFO1 500.1830886 MHz  
NUC1 1H  
P0 5.00 usec  
P1 15.00 usec  
PLW1 4.84679985 W

F2 - Processing parameters  
SI 65536  
SF 500.1800109 MHz  
WDW EM  
SSB 0  
LB 0.30 Hz  
GB 0  
PC 1.00

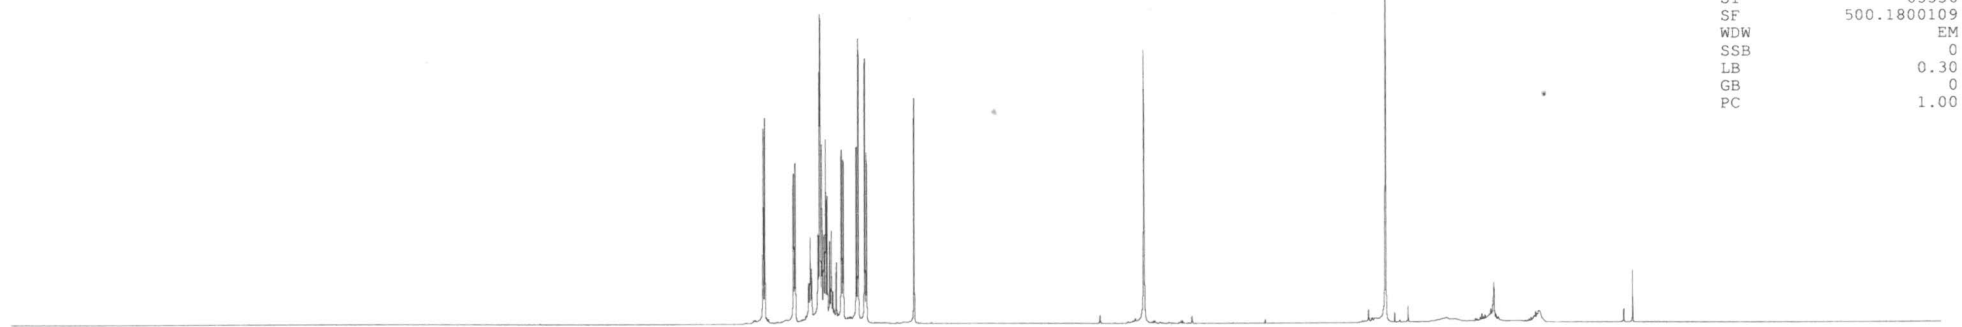

14 13 12 11 10 9 8 7 6 5 4 3 2 1 0 -1 ppm

2.01  
2.06  
1.12  
6.22  
1.10  
2.02  
2.00  
2.04  
1.00  
2.05  
3.08

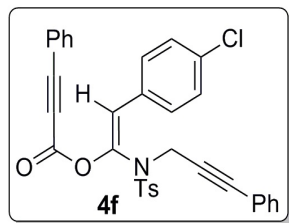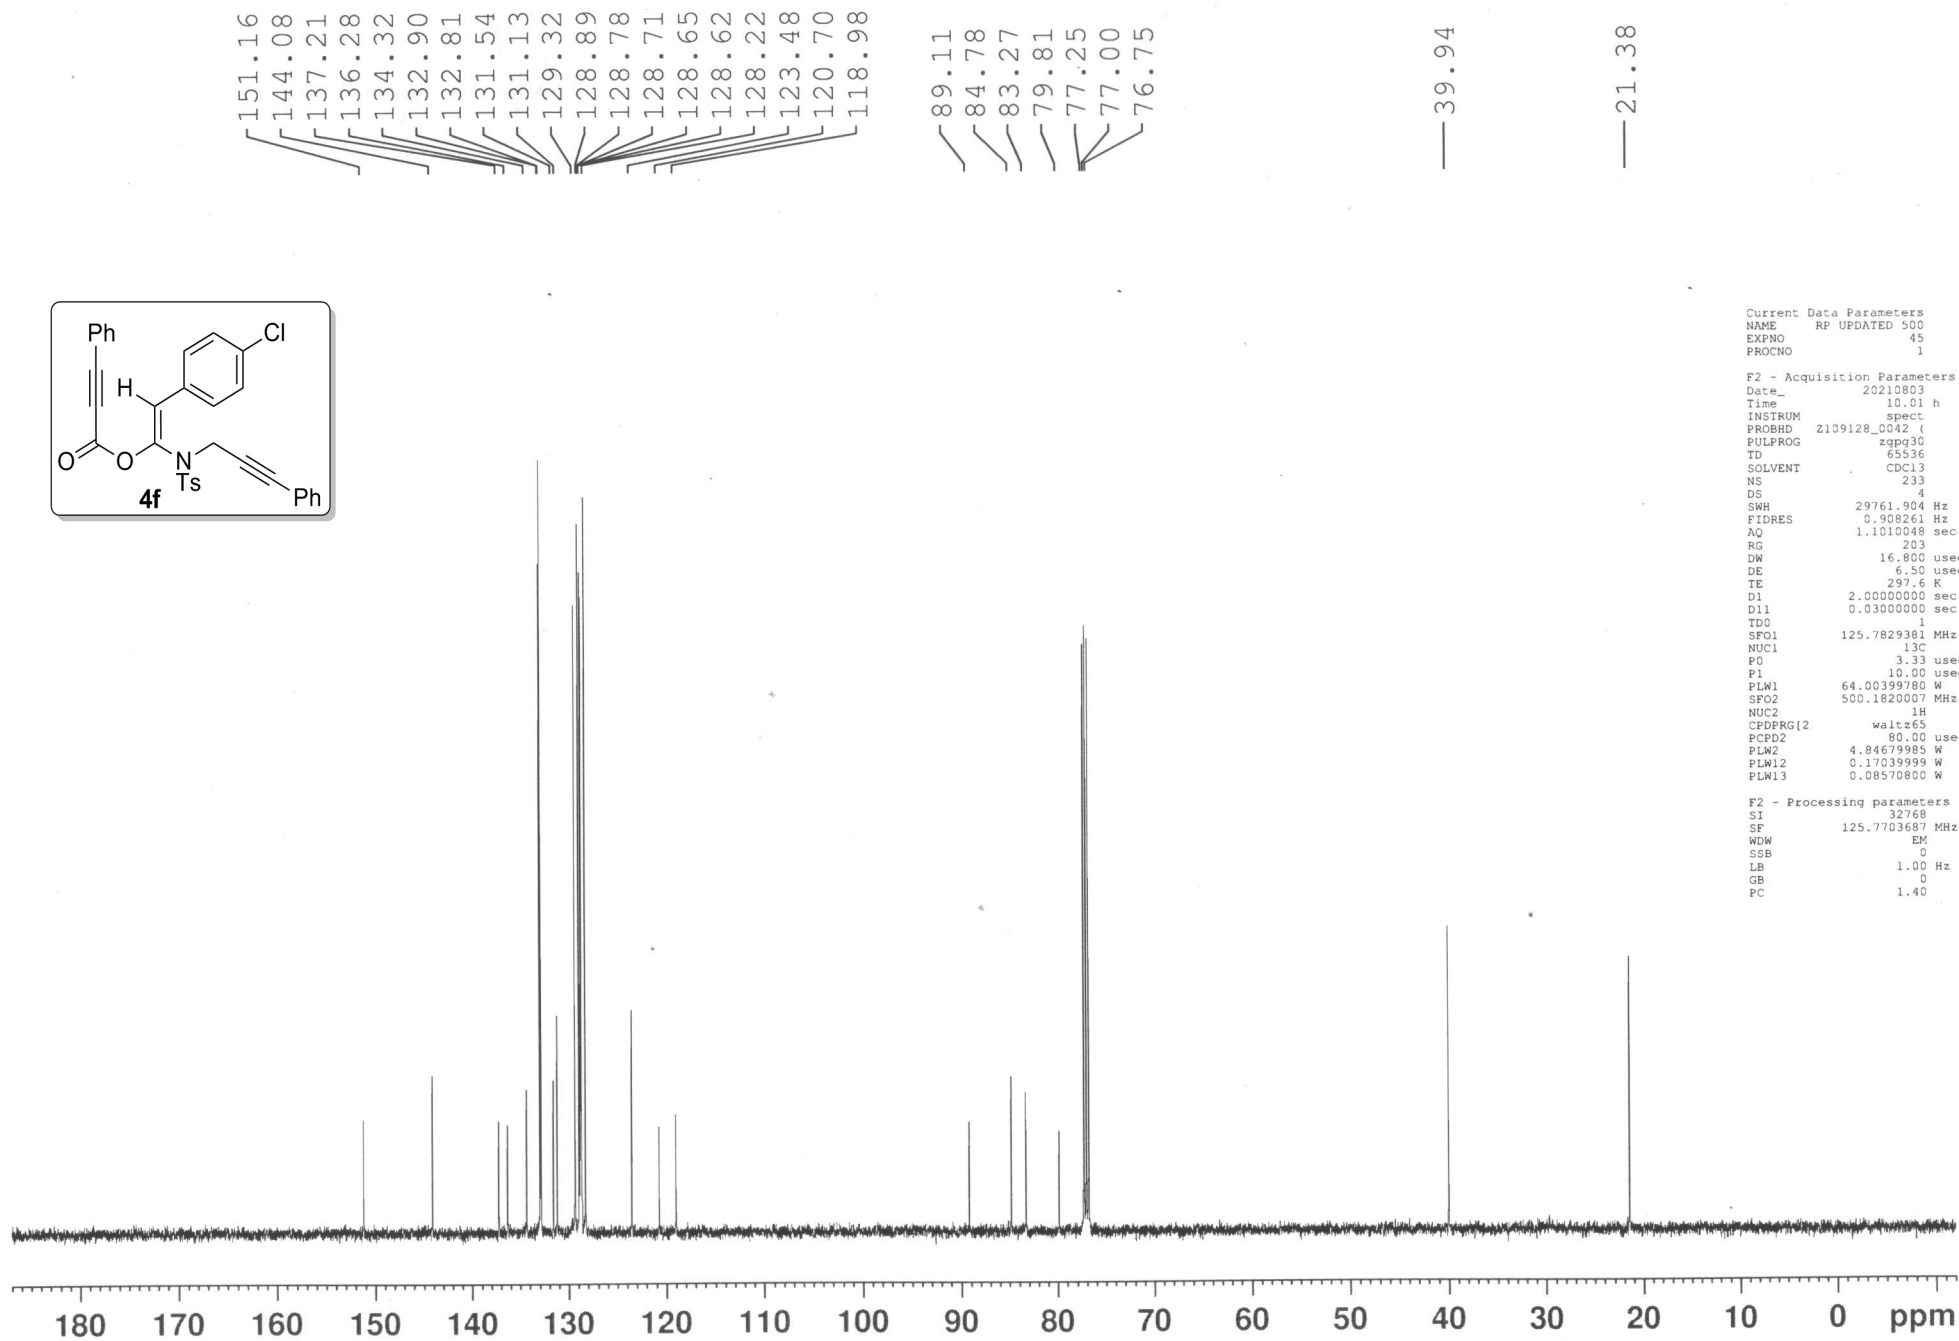

Current Data Parameters  
NAME RP UPDATED 500  
EXPNO 45  
PROCNO 1

F2 - Acquisition Parameters  
Date\_ 20210803  
Time 10.01 h  
INSTRUM spect  
PROBHD Z109128\_0042 ( )  
PULPROG zgpg30  
TD 65536  
SOLVENT CDC13  
NS 233  
DS 4  
SWH 29761.904 Hz  
FIDRES 0.908261 Hz  
AQ 1.1010048 sec  
RG 203  
DW 16.800 usec  
DE 6.50 usec  
TE 297.6 K  
D1 2.0000000 sec  
D11 0.0300000 sec  
TDO 1  
SF01 125.7829381 MHz  
NUC1 13C  
PC 3.33 usec  
P1 10.00 usec  
PLW1 64.00399780 W  
SF02 500.1820007 MHz  
NUC2 1H  
CPDPRG12 waltz165  
PCPD2 80.00 usec  
PLW2 4.84679985 W  
PLW12 0.17039999 W  
PLW13 0.08570800 W

F2 - Processing parameters  
SI 32768  
SF 125.7703687 MHz  
WDW EM  
SSB 0  
LB 1.00 Hz  
GB 0  
PC 1.40



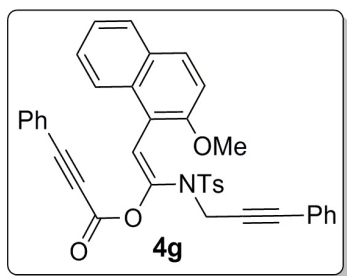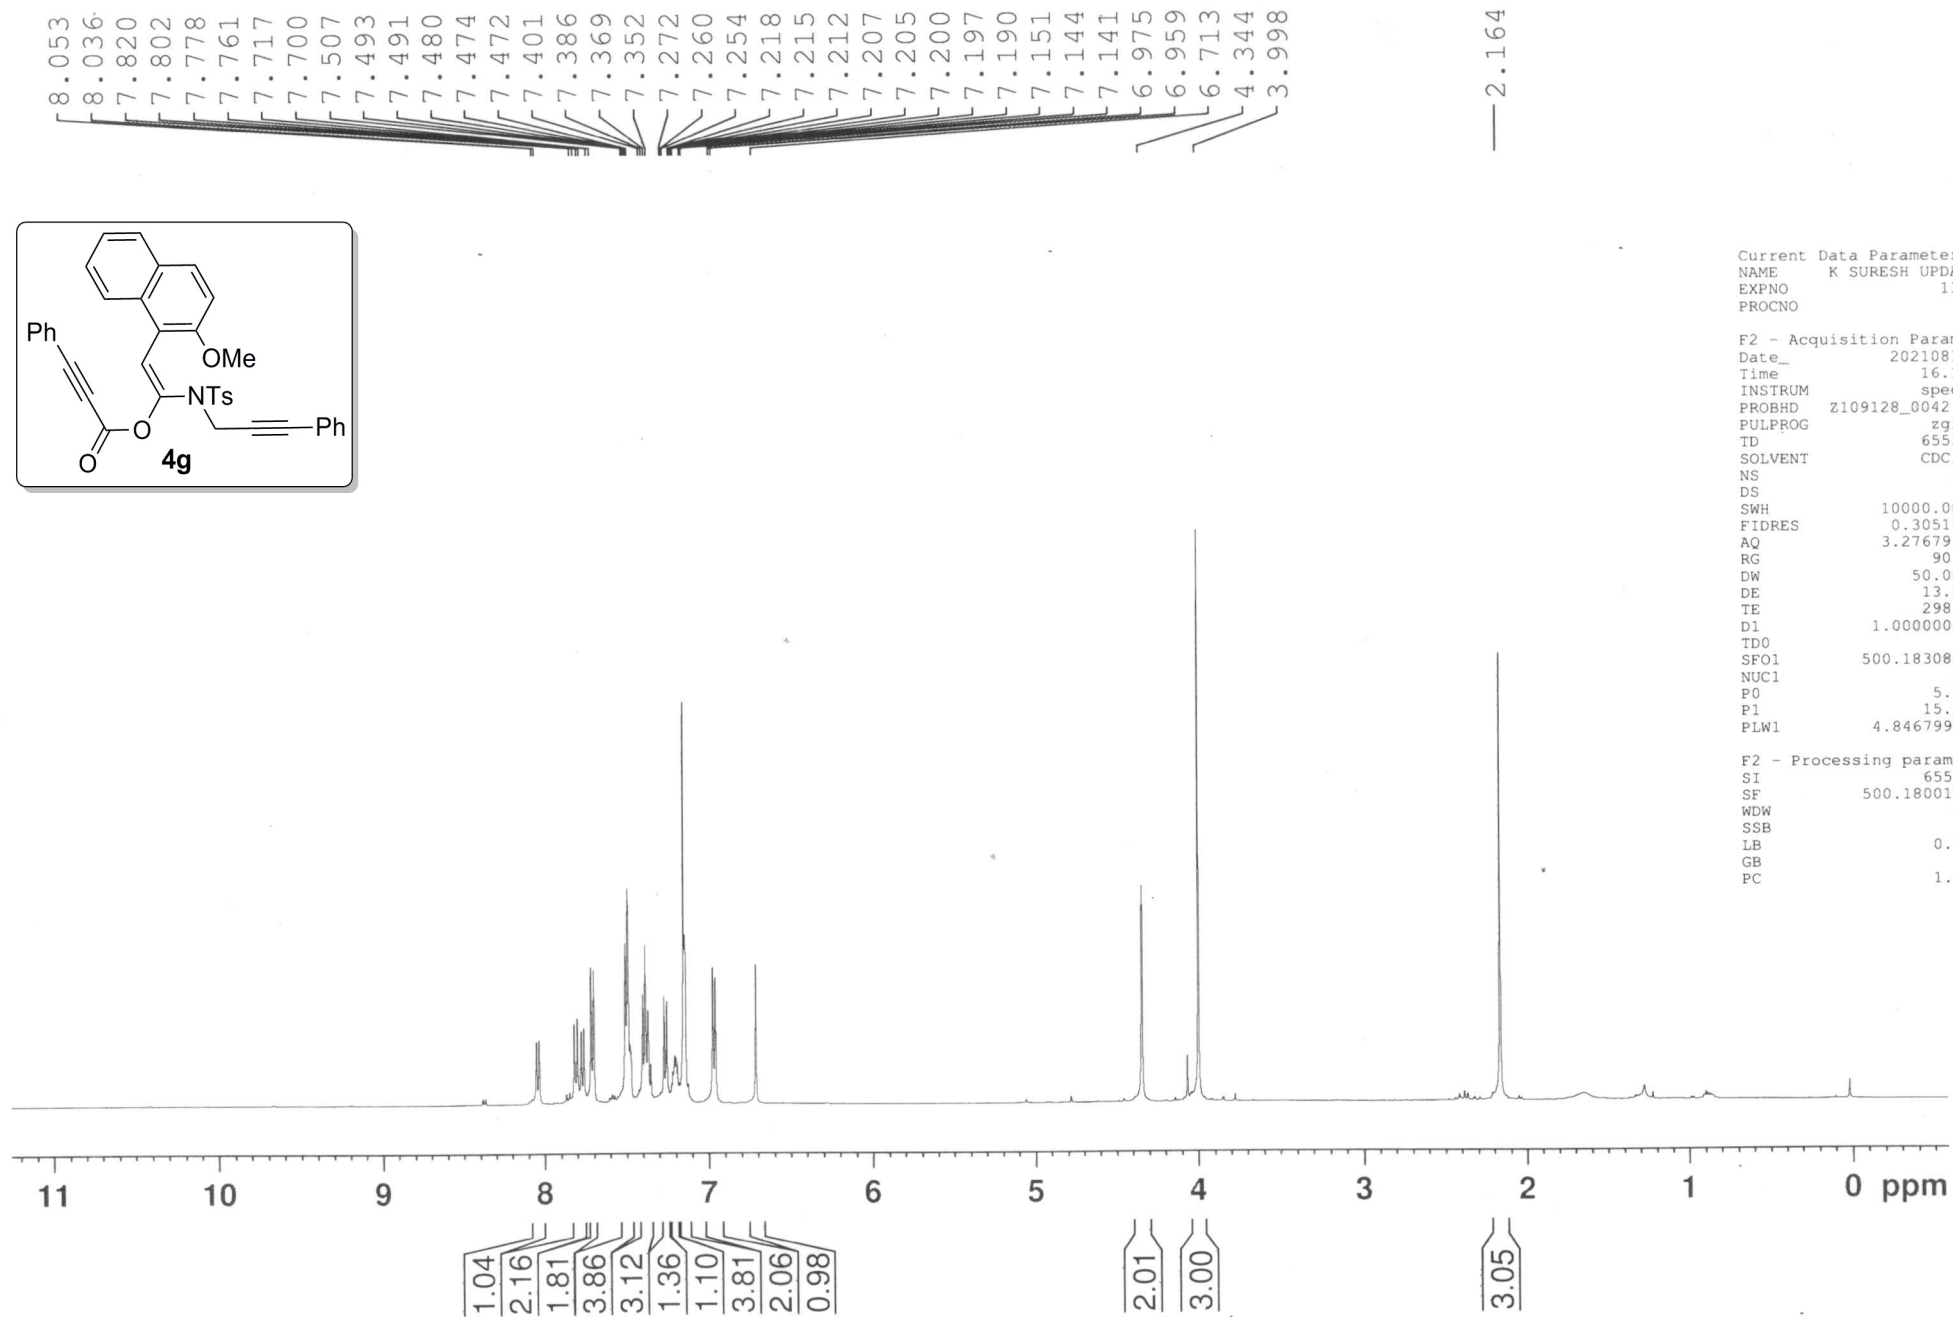

Current Data Parameters  
 NAME K SURESH UPDATED 500  
 EXPNO 135  
 PROCNO 1

F2 - Acquisition Parameters  
 Date\_ 20210812  
 Time 16.13 h  
 INSTRUM spect  
 PROBHD Z109128\_0042 ( )  
 PULPROG zg30  
 TD 65536  
 SOLVENT CDCl3  
 NS 16  
 DS 2  
 SWH 10000.000 Hz  
 FIDRES 0.305176 Hz  
 AQ 3.2767999 sec  
 RG 90.5  
 DW 50.000 usec  
 DE 13.04 usec  
 TE 298.3 K  
 D1 1.00000000 sec  
 TD0 1  
 SFO1 500.1830886 MHz  
 NUC1 1H  
 P0 5.00 usec  
 P1 15.00 usec  
 PLW1 4.84679985 W

F2 - Processing parameters  
 SI 65536  
 SF 500.1800103 MHz  
 WDW EM  
 SSB 0  
 LB 0.30 Hz  
 GB 0  
 PC 1.00

— 2.164

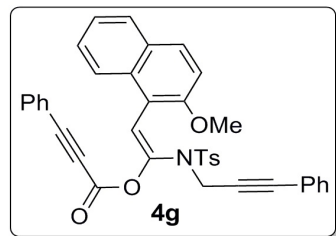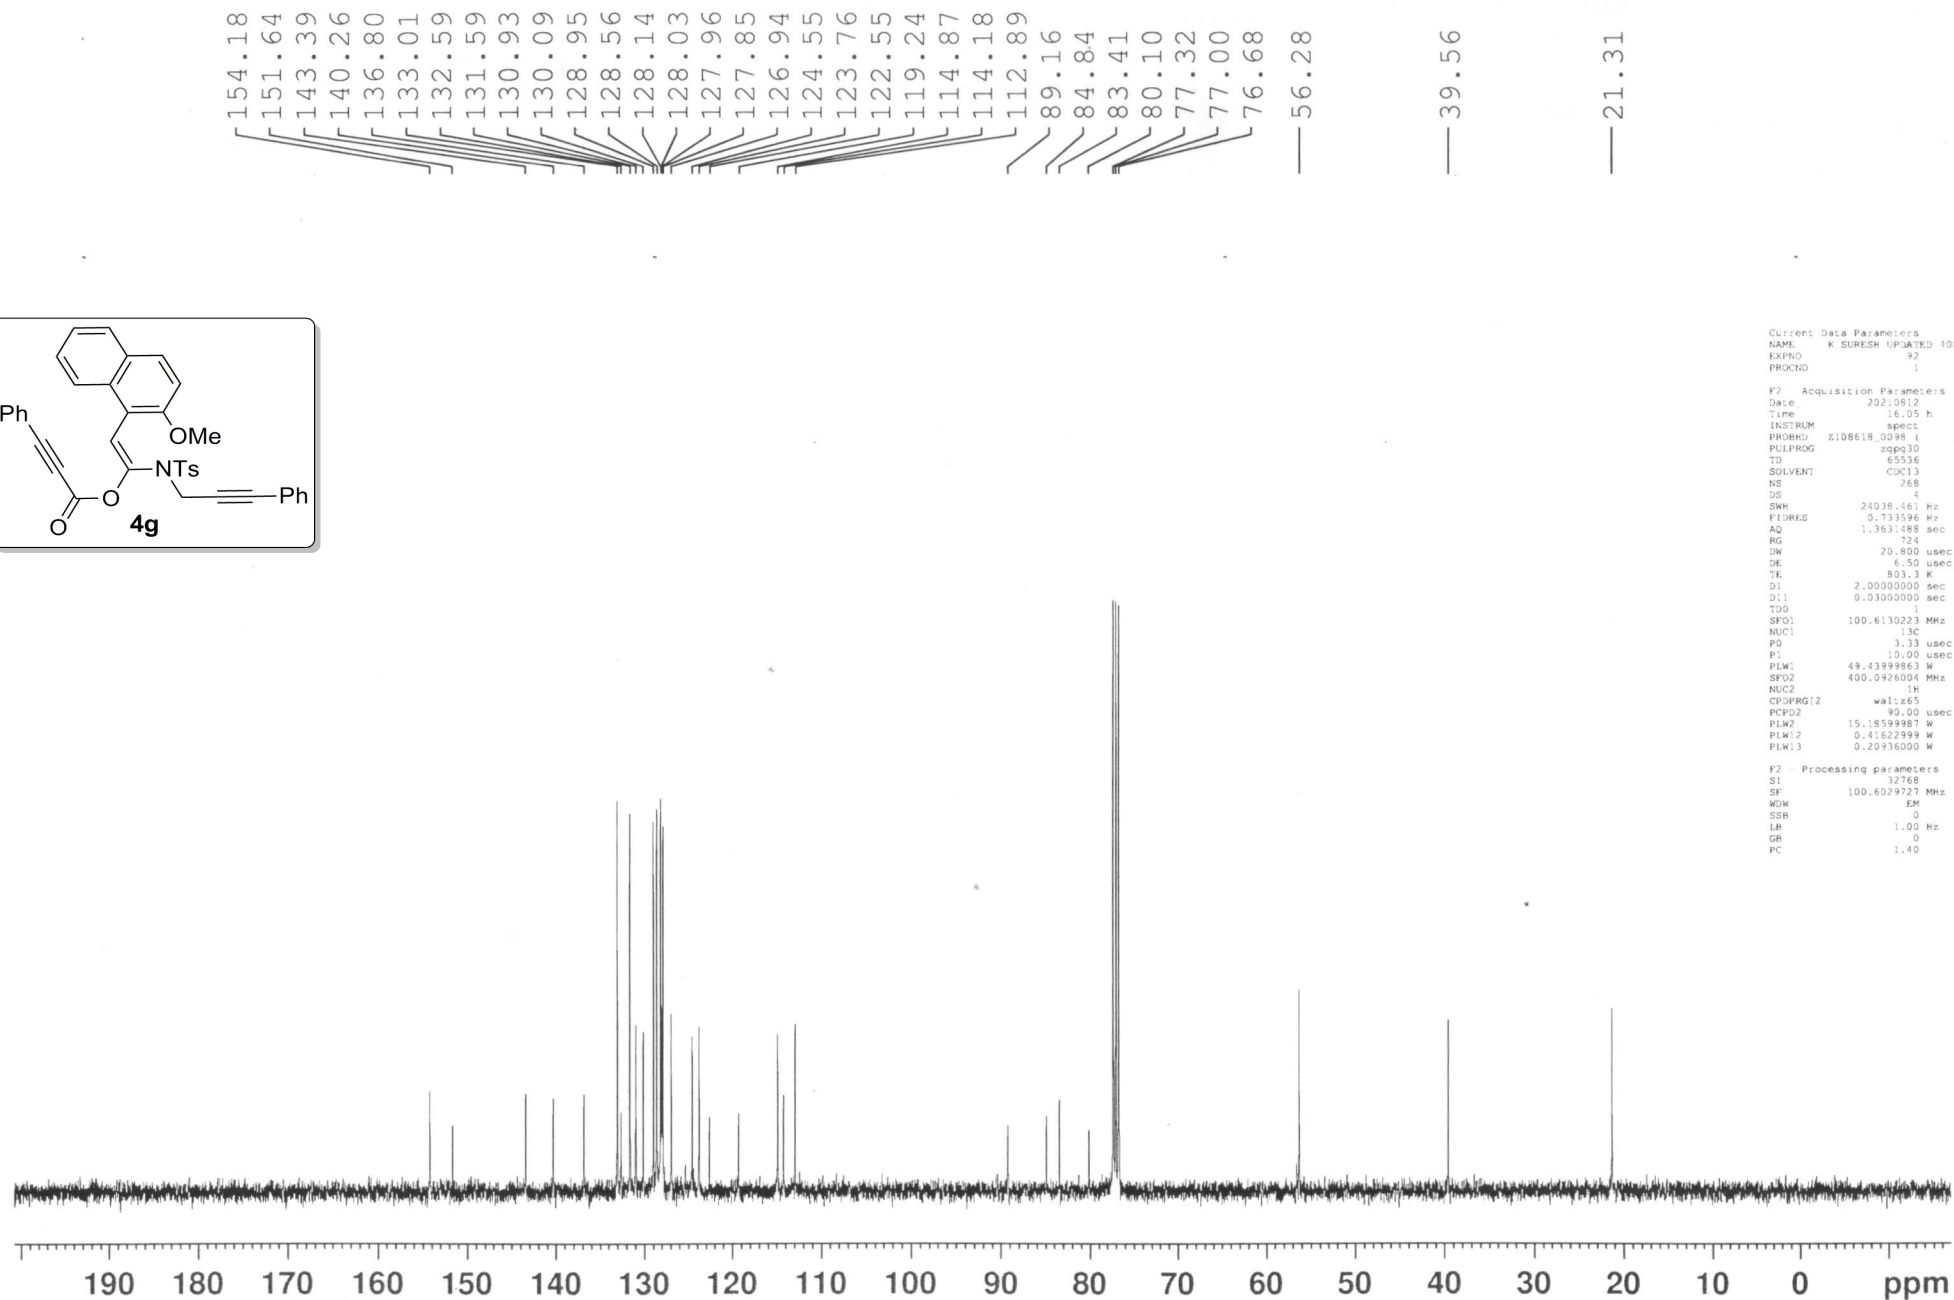

Current Data Parameters  
NAME: K SURESH UPDATED 400  
EXPNO: 92  
PROCNO: 1

F2 - Acquisition Parameters  
Date\_: 20210812  
Time: 16.05 h  
INSTRUM: spect  
PROBHD: Z108618\_0098 1  
PULPROG: zgpg30  
TD: 65536  
SOLVENT: CDCl3  
NS: 268  
DS: 4  
SWH: 24038.461 Hz  
FIDRES: 0.733396 Hz  
AQ: 1.3631488 sec  
RG: 324  
DQ: 20.800 usec  
DE: 6.50 usec  
TE: 803.3 K  
D1: 2.0000000 sec  
D11: 0.0300000 sec  
TDO: 1  
SFO1: 100.6130223 MHz  
NUC1: 13C  
PC: 3.33 usec  
P1: 10.00 usec  
PLW1: 49.43999863 W  
SFO2: 400.0926004 MHz  
NUC2: 1H  
CPDPRG2: waltz165  
PCPD2: 90.00 usec  
PLW2: 15.18599887 W  
PLW3: 0.41622999 W  
PLW4: 0.20936000 W

F2 - Processing parameters  
SI: 32768  
SF: 100.6029727 MHz  
WDW: EM  
SSB: 0  
LB: 1.00 Hz  
GB: 0  
PC: 1.40

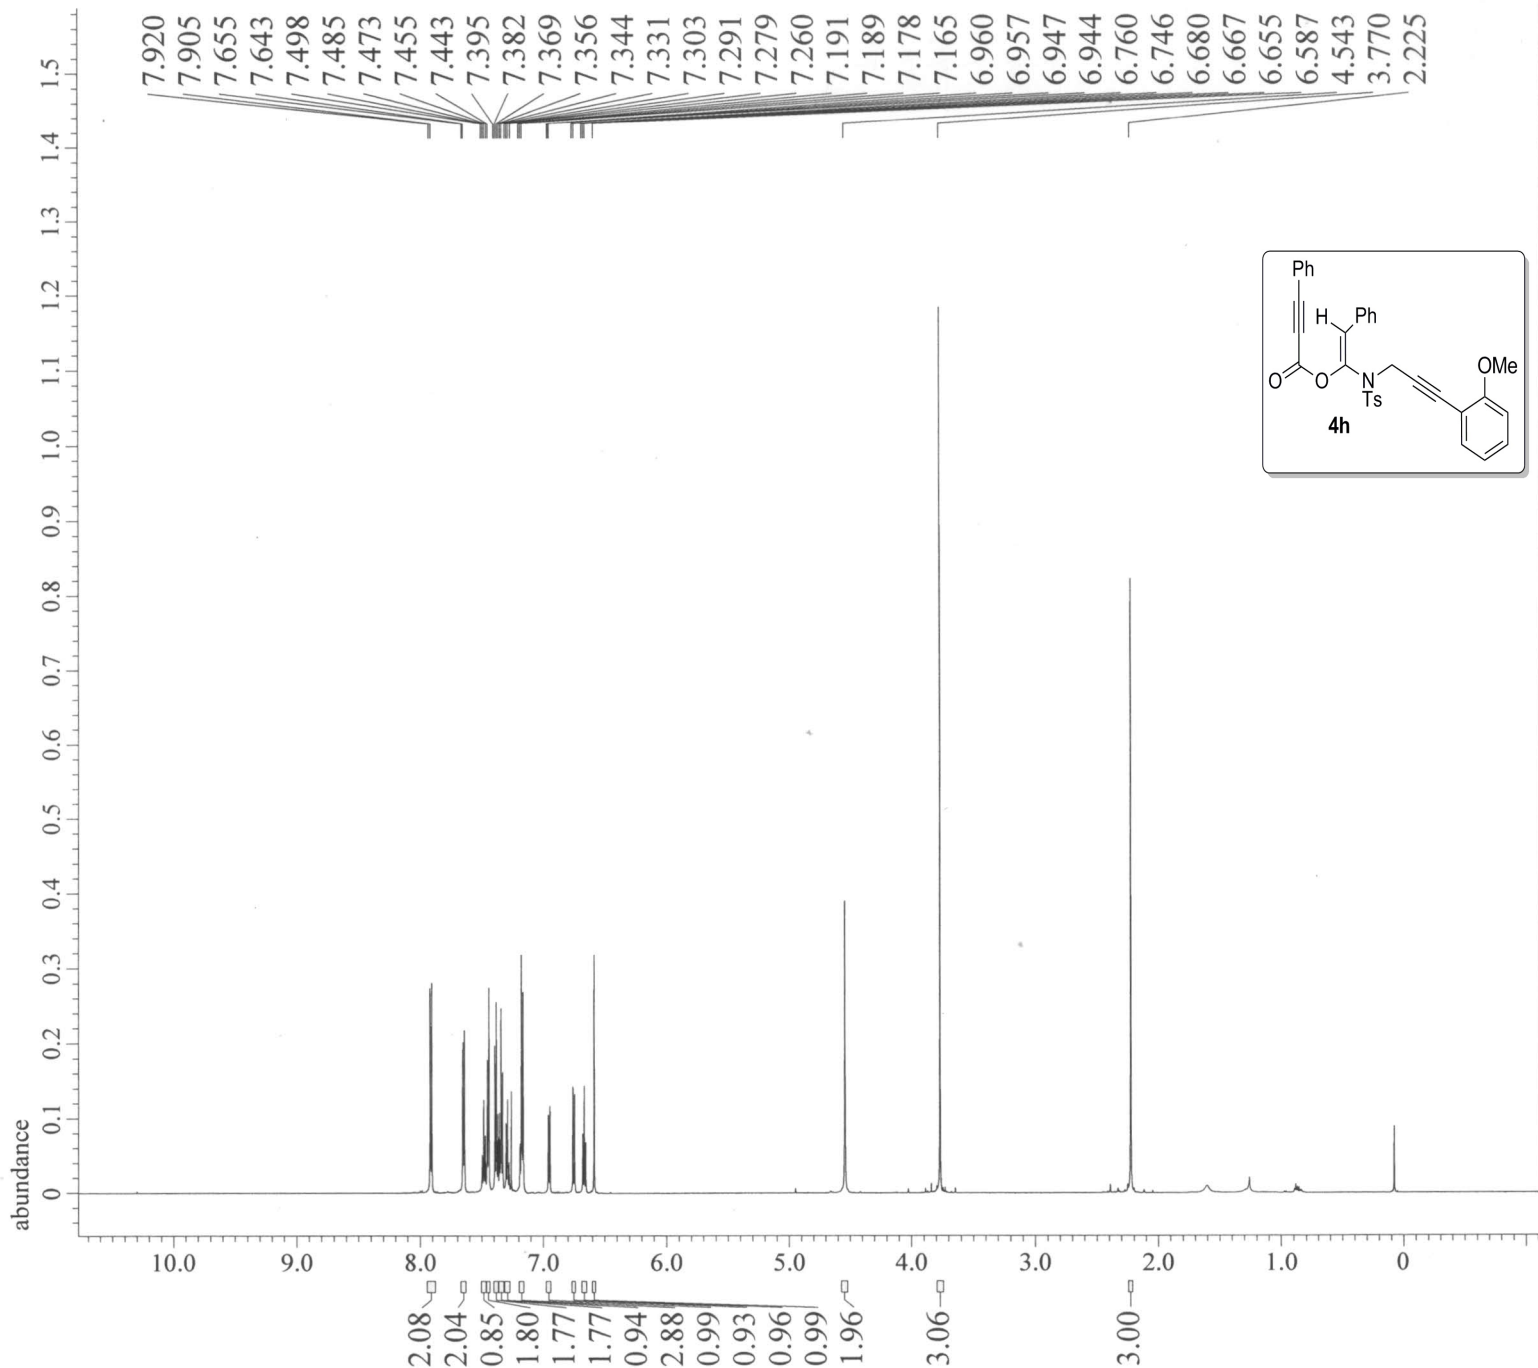

```

Filename      = Vs-19-105_Proton-1-3.
Author       = delta
Experiment   = proton auto.jxp
Sample Id    = Vs-19-105
Solvent      = CHLOROFORM-D
Actual_Start_Time = 9-FEB-2021 10:19:48
Revision_Time  = 15-AUG-2021 16:37:24

Comment      = single pulse
Data Format   = 1D COMPLEX
Dim Size     = 52429
X_Domain     = Proton
Dim Title    = Proton
Dim Units    = [ppm]
Dimensions   = X
Site         = ACRHEM UOH
Spectrometer = JNM-ECZ600R/M1

Field_Strength = 14.09636928[T] (600[M]
X_Acq_Duration = 0.72876032[s]
X_Domain       = Proton
X_Freq         = 600.1723046[MHz]
X_Offset       = 5[ppm]
X_Points       = 16384
X_Prescans     = 1
X_Resolution   = 1.37219326[Hz]
X_Sweep        = 22.48201439[kHz]
X_Sweep_Clippped = 17.98561151[kHz]
Irr_Domain     = Proton
Irr_Freq       = 600.1723046[MHz]
Irr_Offset     = 5[ppm]
Tri_Domain     = Proton
Tri_Freq       = 600.1723046[MHz]
Tri_Offset     = 5[ppm]
Blanking       = 2[us]
Clipped        = FALSE
Scans          = 16
Total_Scans    = 16

Relaxation_Delay = 5[s]
Recvr_Gain       = 56
Temp_Get         = 19.1[dC]
X_90_Width       = 6.89[us]
X_Acq_Time       = 0.72876032[s]
X_Angle          = 45[deg]
X_Atn            = 12.6[dB]
X_Pulse          = 3.445[us]
Irr_Mode         = Off
Tri_Mode         = Off
Dante_Loop       = 500
Dante_Presat     = FALSE
Decimation_Rate = 0
Experiment_Path  = c:\Program Files\JEOL
Initial_Wait     = 1[s]
Phase            = {0, 90, 270, 180, 180
Presat_Time      = 5[s]
Presat_Time_Flag = FALSE
Relaxation_Delay_Calc = 0[s]
Relaxation_Delay_Temp = 5[s]
Repetition_Time  = 5.72876032[s]

```

X : parts per Million : Proton

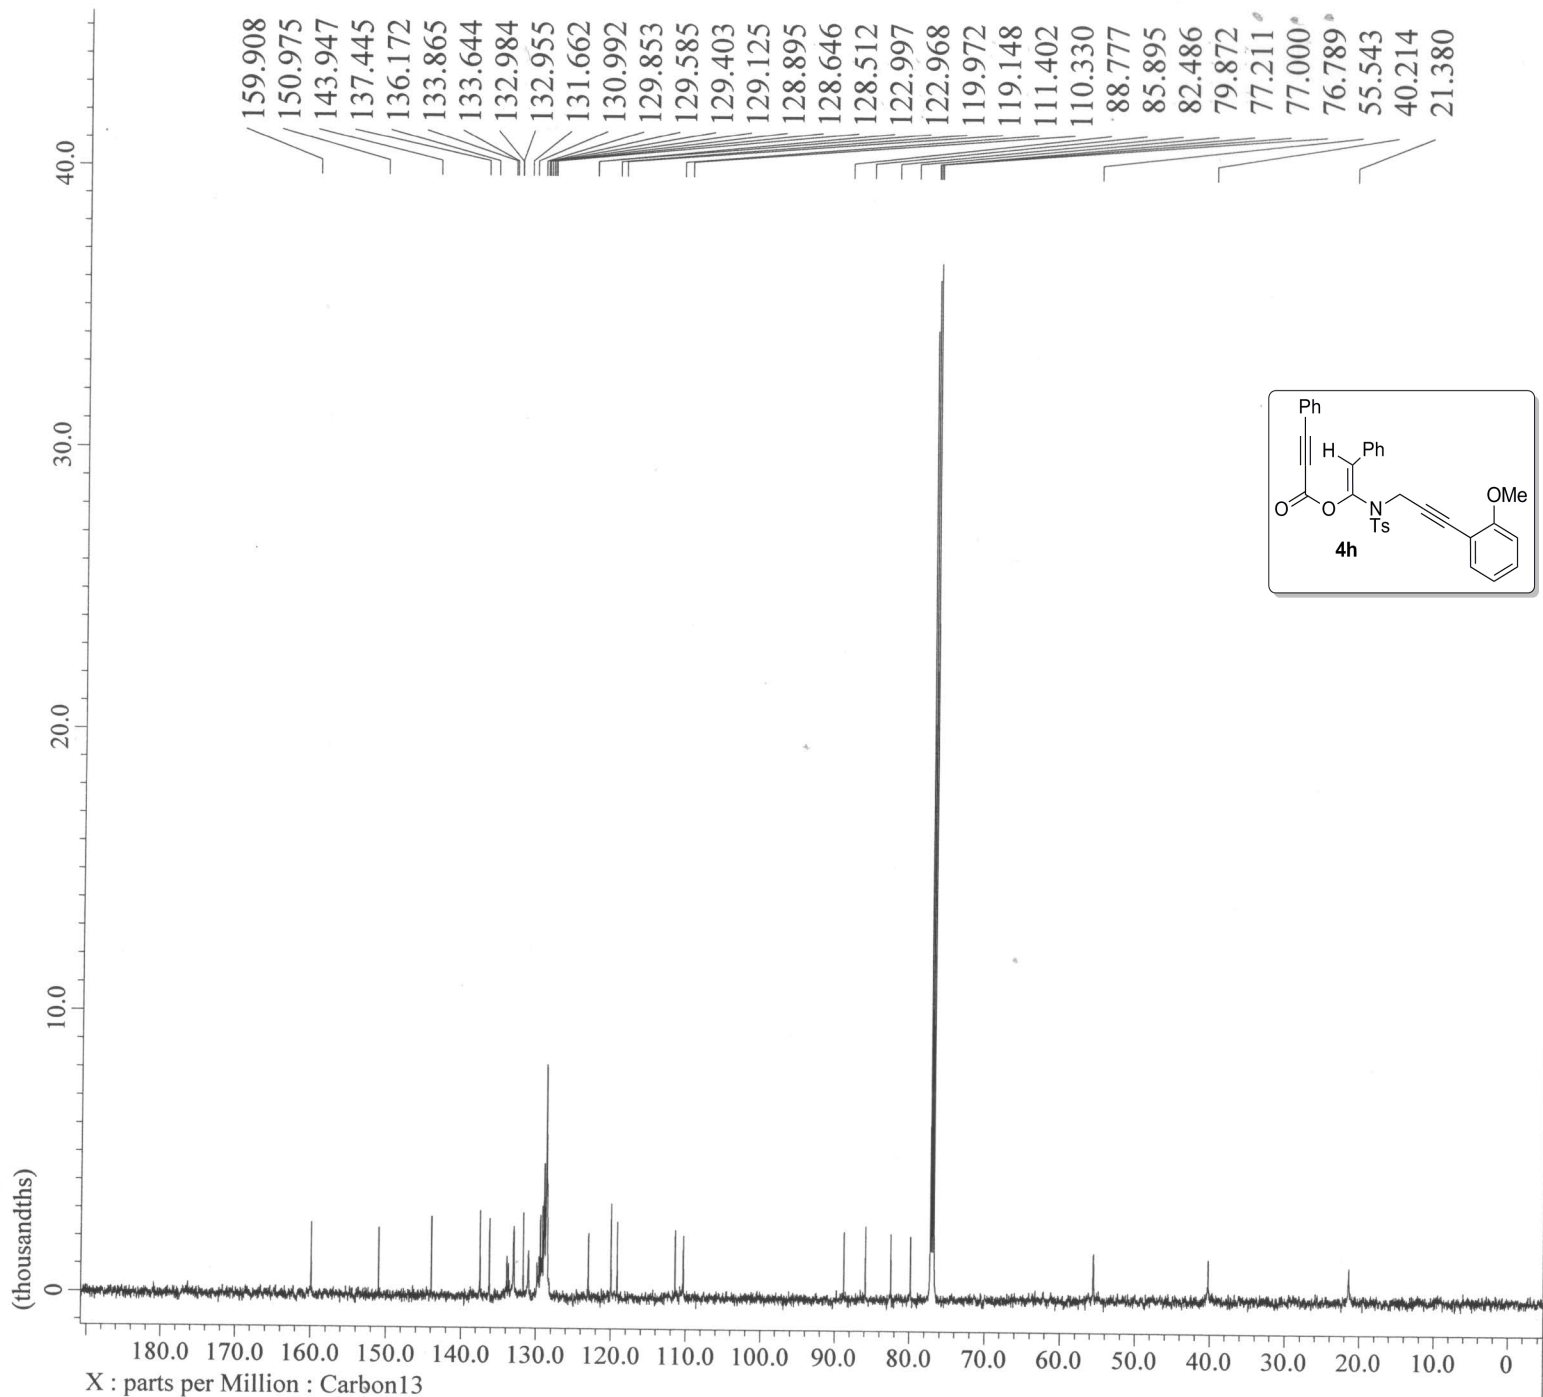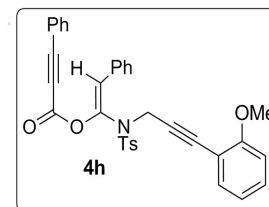

|                          |                      |
|--------------------------|----------------------|
| Filename                 | = Vs-19-105_Carbon-1 |
| Author                   | = delta              |
| Experiment               | = carbon auto. jxp   |
| Sample_Id                | = Vs-19-I05          |
| Solvent                  | = CHLOROFORM-D       |
| Actual_Start_Time        | = 9-FEB-2021 10:21:  |
| Revision_Time            | = 15-AUG-2021 16:41: |
| Comment                  | = single pulse decou |
| Data_Format              | = 1D COMPLEX         |
| Dim_Size                 | = 26214              |
| X_Domain                 | = Carbon13           |
| Dim_Title                | = Carbon13           |
| Dim_Units                | = [ppm]              |
| Dimensions               | = X                  |
| Site                     | = ACRHEM_UOH         |
| Spectrometer             | = JNM-ECZ600R/M1     |
| Field_Strength           | = 14.09636928[T] (60 |
| X_Acq_Duration           | = 0.34603008[s]      |
| X_Domain                 | = Carbon13           |
| X_Freq                   | = 150.91343039[MHz]  |
| X_Offset                 | = 100[ppm]           |
| X_Points                 | = 16384              |
| X_Prescans               | = 4                  |
| X_Resolution             | = 2.88992217[Hz]     |
| X_Sweep                  | = 47.34848485[kHz]   |
| X_Sweep_Clipped          | = 37.87878788[kHz]   |
| Irr_Domain               | = Proton             |
| Irr_Freq                 | = 600.1723046[MHz]   |
| Irr_Offset               | = 5[ppm]             |
| Blanking                 | = 2[us]              |
| Clipped                  | = FALSE              |
| Scans                    | = 402                |
| Total_Scans              | = 402                |
| Relaxation_Delay         | = 2[s]               |
| Recvr_Gain               | = 56                 |
| Temp_Get                 | = 19.2[dC]           |
| X_90_Width               | = 11[us]             |
| X_Acq_Time               | = 0.34603008[s]      |
| X_Angle                  | = 30[deg]            |
| X_Atn                    | = 10.3[dB]           |
| X_Pulse                  | = 3.66666667[us]     |
| Irr_Atn_Dec              | = 33.452[dB]         |
| Irr_Atn_Dec_Calc         | = 33.452[dB]         |
| Irr_Atn_Dec_Default_Calc | = 33.452[dB]         |
| Irr_Atn_No               | = 33.452[dB]         |
| Irr_Dec_Bandwidth_Hz     | = 7.23684211[kHz]    |
| Irr_Dec_Bandwidth_Ppm    | = 12.05794078[ppm]   |
| Irr_Dec_Freq             | = 600.1723046[MHz]   |
| Irr_Dec_Merit_Factor     | = 2.2                |
| Irr_Decoupling           | = TRUE               |
| Irr_No                   | = TRUE               |
| Irr_Noise                | = WALTZ              |
| Irr_Offset_Default       | = 5[ppm]             |
| Irr_Pwidth               | = 76[us]             |
| Irr_Pwidth_Default       | = 76[us]             |
| Irr_Pwidth_Default_Calc  | = 76[us]             |
| Irr_Pwidth_Temp          | = 76[us]             |
| Irr_Wurst                | = FALSE              |
| Decimation_Rate          | = 0                  |
| Experiment_Path          | = c:\Program Files\J |
| Initial_Wait             | = 1[s]               |
| Noe_Time                 | = 2[s]               |
| Noe_Time_Flag            | = FALSE              |
| Relaxation_Delay_Calc    | = 0[s]               |
| Relaxation_Delay_Temp    | = 2[s]               |

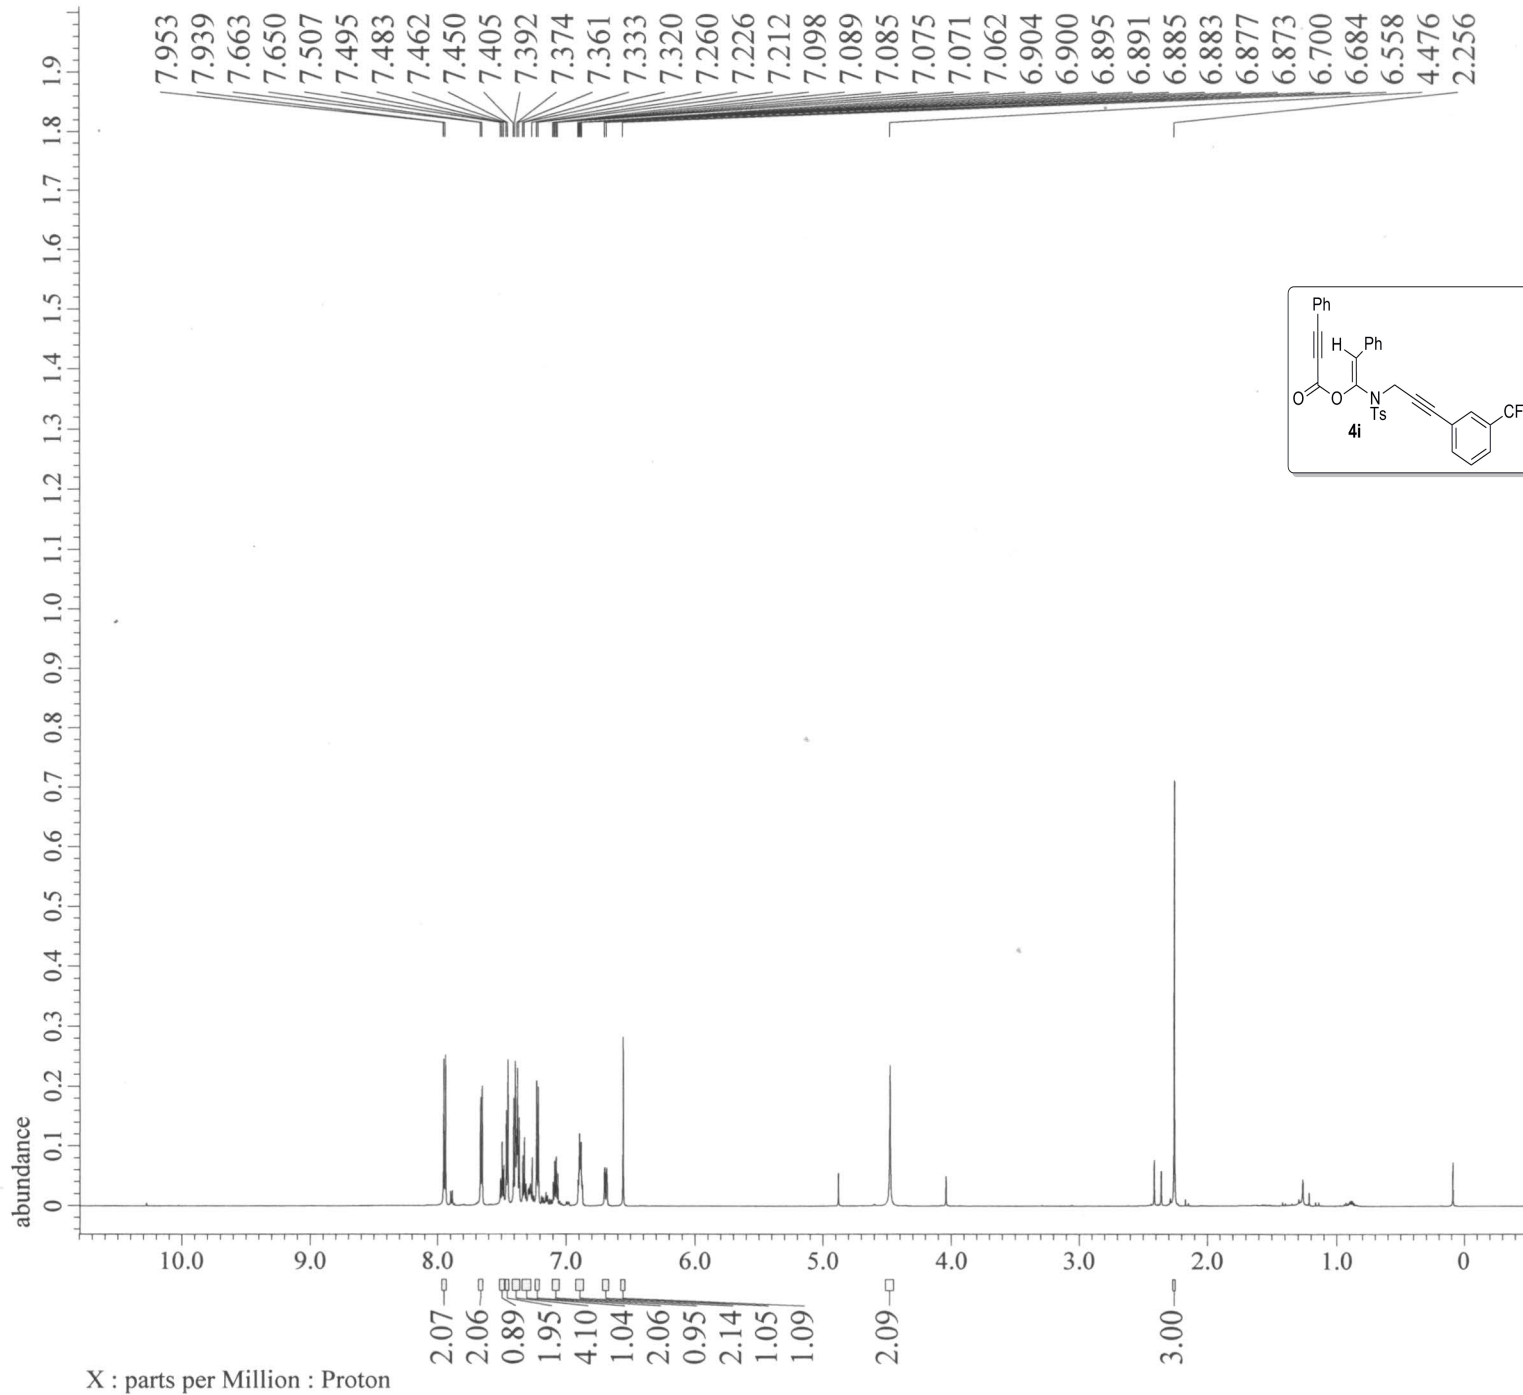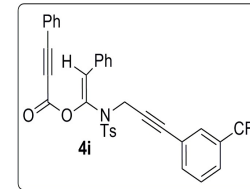

```

Filename      = vs-19-114_Proton-1-4.
Author       = delta
Experiment   = proton_auto.jxp
Sample_Id    = vs-19-114
Solvent      = CHLOROFORM-D
Actual_Start_Time = 20-JAN-2021 17:19:09
Revision_Time   = 15-AUG-2021 16:24:29

Comment      = single_pulse
Data_Format  = 1D_COMPLEX
Dim_Size     = 52429
X_Domain     = Proton
Dim_Title    = Proton
Dim_Units    = [ppm]
Dimensions   = X
Site         = ACRHEM_UOH
Spectrometer = JNM-ECZ600R/M1

Field_Strength = 14.09636928[T] (600[M]
X_Acq_Duration = 0.72876032[s]
X_Domain       = Proton
X_Freq         = 600.1723046[MHz]
X_Offset       = 6.5[ppm]
X_Points       = 16384
X_Prescans     = 1
X_Resolution   = 1.37219326[Hz]
X_Sweep        = 22.48201439[kHz]
X_Sweep_Clipped = 17.98561151[kHz]
Irr_Domain     = Proton
Irr_Freq       = 600.1723046[MHz]
Irr_Offset     = 5[ppm]
Tri_Domain     = Proton
Tri_Freq       = 600.1723046[MHz]
Tri_Offset     = 5[ppm]
Blanking       = 2[us]
Clipped        = FALSE
Scans          = 16
Total_Scans    = 16

Relaxation_Delay = 5[s]
Recvr_Gain       = 36
Temp_Get         = 19.5[dC]
X_90_Width      = 6.89[us]
X_Acq_Time      = 0.72876032[s]
X_Angle         = 45[deg]
X_Atn           = 12.6[dB]
X_Pulse         = 3.445[us]
Irr_Mode        = Off
Tri_Mode        = Off
Dante_Loop      = 500
Dante_Presat    = FALSE
Decimation_Rate = 0
Experiment_Path = c:\Program Files\JEOL
Initial_Wait    = 1[s]
Phase           = {0, 90, 270, 180, 180}
Presat_Time     = 5[s]
Presat_Time_Flag = FALSE
Relaxation_Delay_Calc = 0[s]
Relaxation_Delay_Temp = 5[s]
Repetition_Time = 5.72876032[s]

```

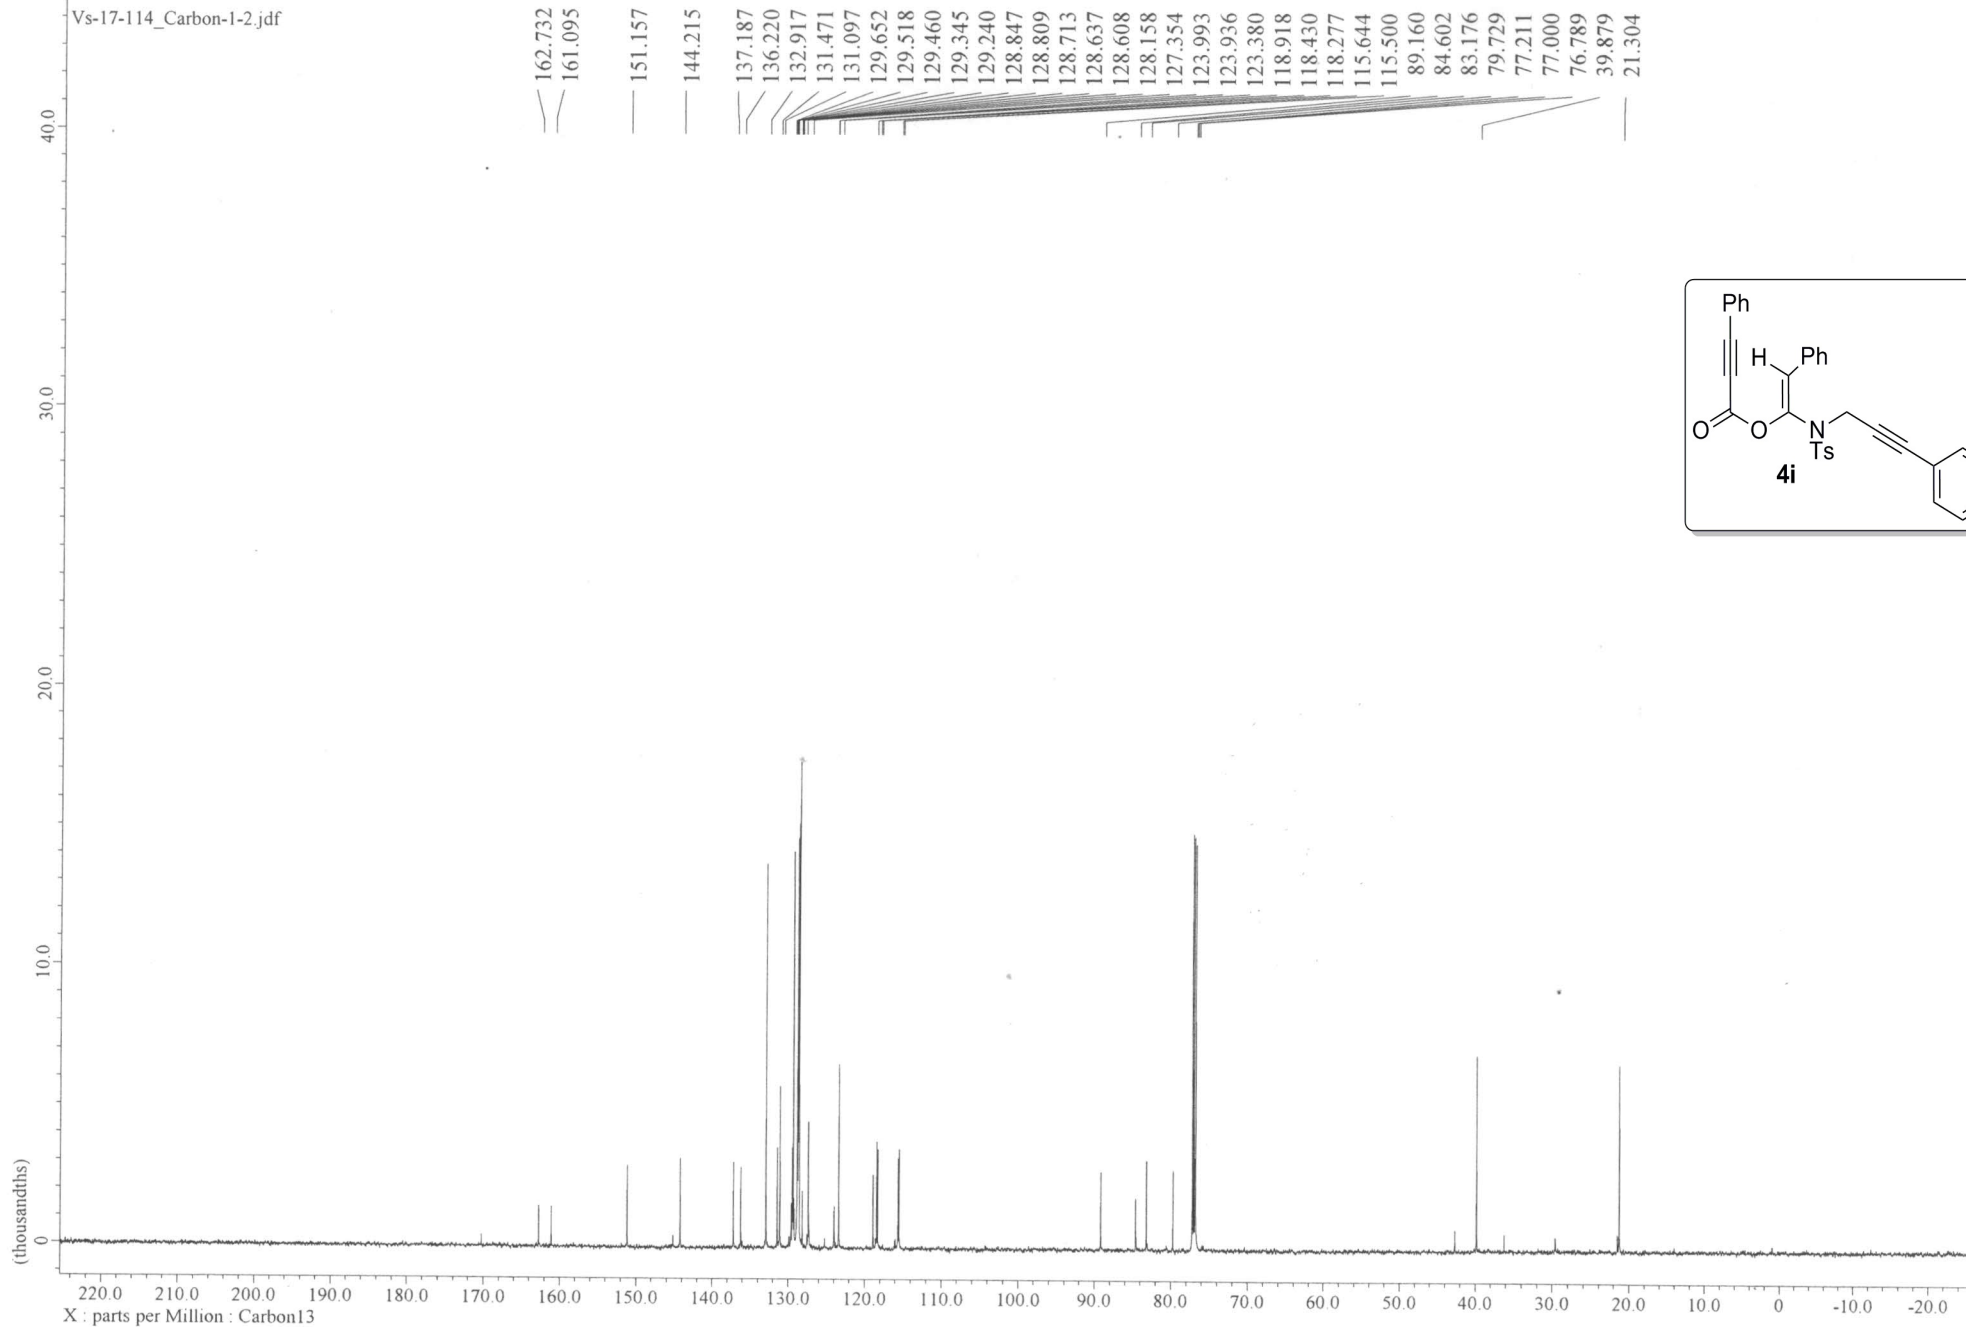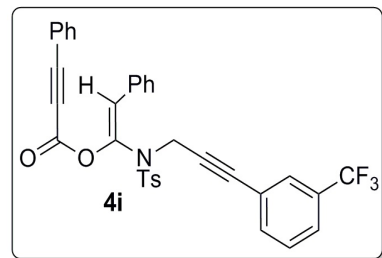

—62.96

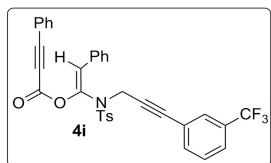

Current Data Parameters  
NAME K SURESH UPDATED 500  
EXPNO 143  
PROCNO 1

F2 - Acquisition Parameters  
Date\_ 20210915  
Time 10.07 h  
INSTRUM spect  
PROBHD z109128\_0042 (  
PULPROG zgfhigqn.2  
TD 131072  
SOLVENT CDC13  
NS 16  
DS 4  
SWH 113636.367 Hz  
FIDRES 1.733953 Hz  
AQ 0.5767168 sec  
RG 456  
DW 4.400 usec  
DE 6.50 usec  
TE 298.1 K  
D1 1.00000000 sec  
D11 0.03000000 sec  
D12 0.00002000 sec  
TD0 1  
SFO1 470.5923603 MHz  
NUC1 19F  
P1 12.00 usec  
PLW1 36.12599945 W  
SFO2 500.1820007 MHz  
NUC2 1H  
CPDPRG2 waltz16  
PCPD2 80.00 usec  
PLW2 4.84679985 W  
PLW12 0.17039999 W

F2 - Processing parameters  
SI 65536  
SF 470.6394242 MHz  
WDW EM  
SSB 0  
LB 0.30 Hz  
GB 0  
PC 1.00

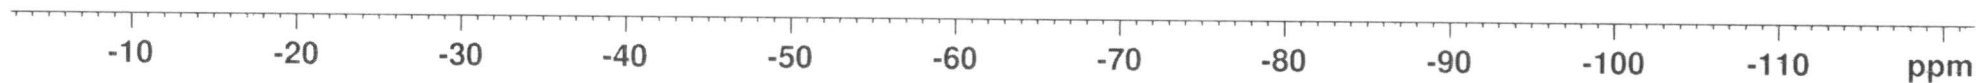

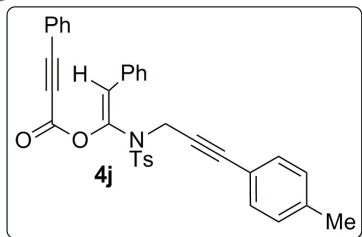

7.963  
7.946  
7.686  
7.671  
7.521  
7.518  
7.507  
7.493  
7.442  
7.428  
7.412  
7.397  
7.382  
7.367  
7.342  
7.327  
7.280  
7.229  
7.213  
7.017  
7.001  
6.946  
6.930  
6.585

— 4.502

— 2.267

Current Data Parameters  
NAME SD UPDATED 500  
EXPNO 122  
PROCNO 1

F2 Acquisition Parameters  
Date\_ 20210128  
Time 11:01 h  
INSTRUM spect  
PROBHD Z109128\_0042 ( )  
PULPROG zg30  
TD 65536  
SOLVENT CDCl3  
NS 16  
DS 2  
SWH 10000.000 Hz  
FIDRES 0.305176 Hz  
AQ 3.2767999 sec  
RG 90.5  
DW 50.000 usec  
DE 13.04 usec  
TE 295.8 K  
D1 1.00000000 sec  
TDO 1  
SFO1 500.1830886 MHz  
NUC1 1H  
P0 5.00 usec  
P1 15.00 usec  
PLW1 4.84679985 W

F2 Processing parameters  
SI 65536  
SF 500.1800000 MHz  
WDW EM  
SSB 0  
LB 0.30 Hz  
GB 0  
PC 1.00

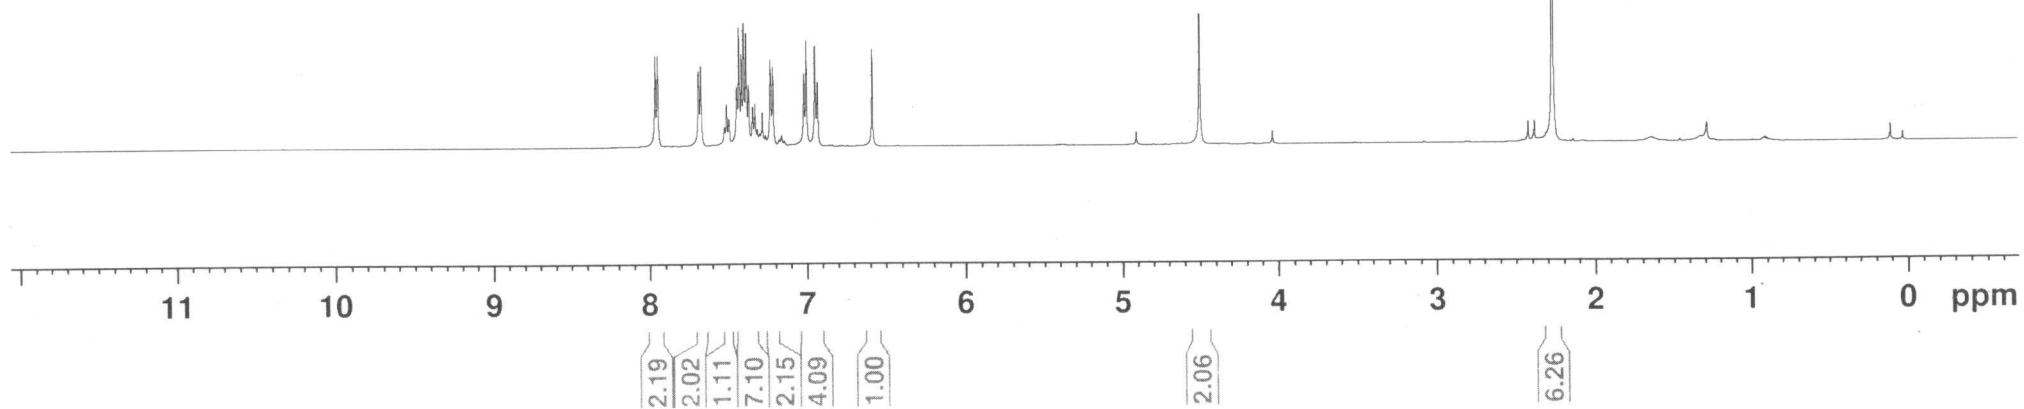



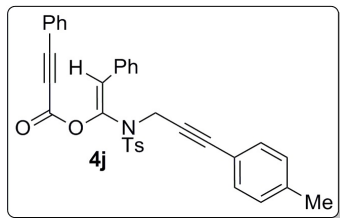

151.10  
143.99  
138.30  
137.35  
136.30  
132.93  
131.62  
131.50  
130.94  
129.29  
128.88  
128.69  
128.62  
128.58  
128.52  
123.28  
119.16  
119.13

88.93  
86.08  
81.37  
79.86  
77.25  
77.00  
76.74

— 40.04

< 21.36  
< 21.33

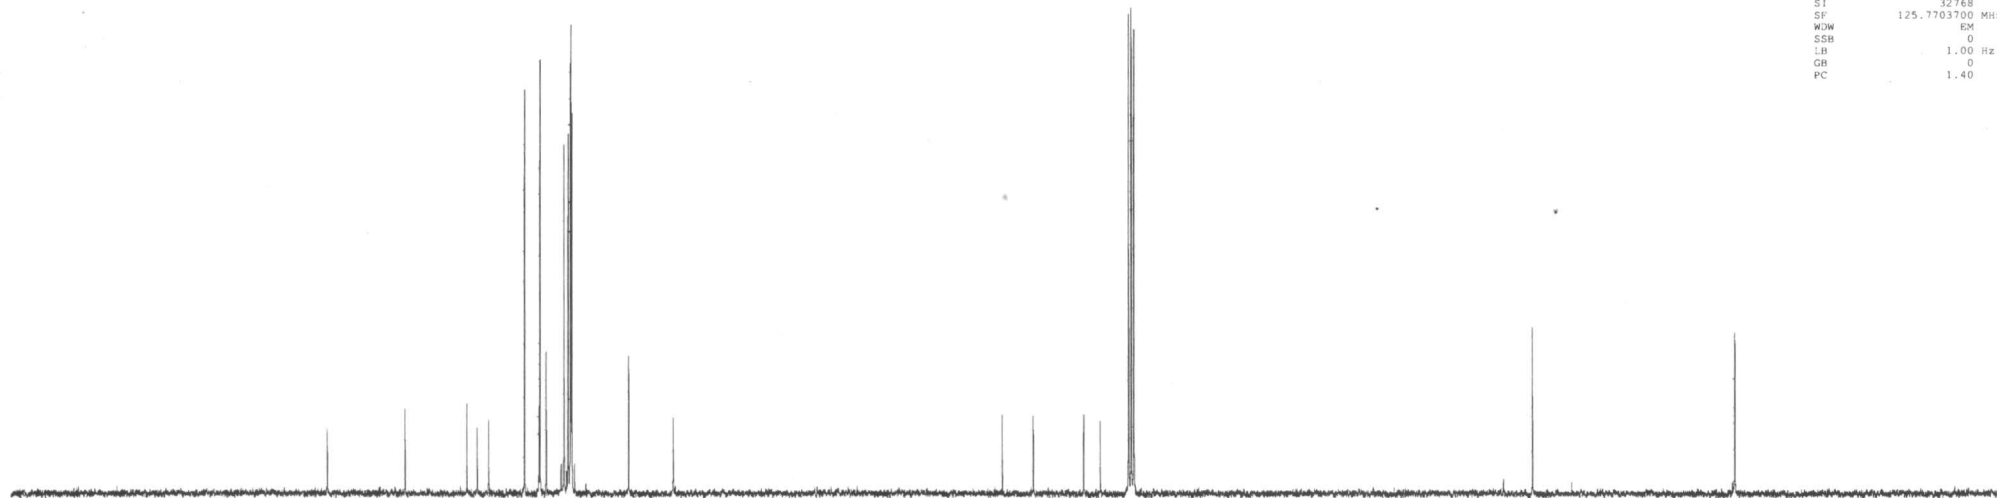

170 160 150 140 130 120 110 100 90 80 70 60 50 40 30 20 10 ppm

```

Current Data Parameters
NAME      50 UPDATED 500
EXPNO     123
PROCNO    1

F2 - Acquisition Parameters
Date_     20210128
Time      11.17 h
INSTRUM   spect
PROBHD    R109128_0042 (
PULPROG   zgpg30
TD         65536
SOLVENT   CDCl3
NS         302
DS         4
SWH        29761.904 Hz
FIDRES    0.408261 Hz
AQ         1.1010048 sec
RG         203
DW         16.800 usec
DE         6.50 usec
TE         295.8 K
D1         2.0000000 sec
D11        0.0300000 sec
TSD        1
SFO1      125.7829381 MHz
NUC1       13C
P0         3.33 usec
P1         10.00 usec
P.LW1     64.00399780 W
SFO2      500.1820007 MHz
NUC2       1H
CPDPRG2   waltz65
PCPD2     80.00 usec
PLW2      4.84679985 W
PLW12     0.17039999 W
PLW13     0.08570800 W

F2 - Processing parameters
SI         32768
SF         125.7703700 MHz
WDW        EM
SSB        0
LB         1.00 Hz
GB         0
PC         1.40
  
```

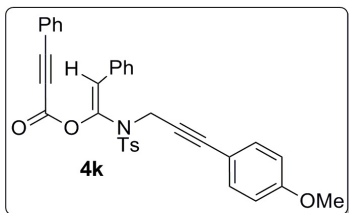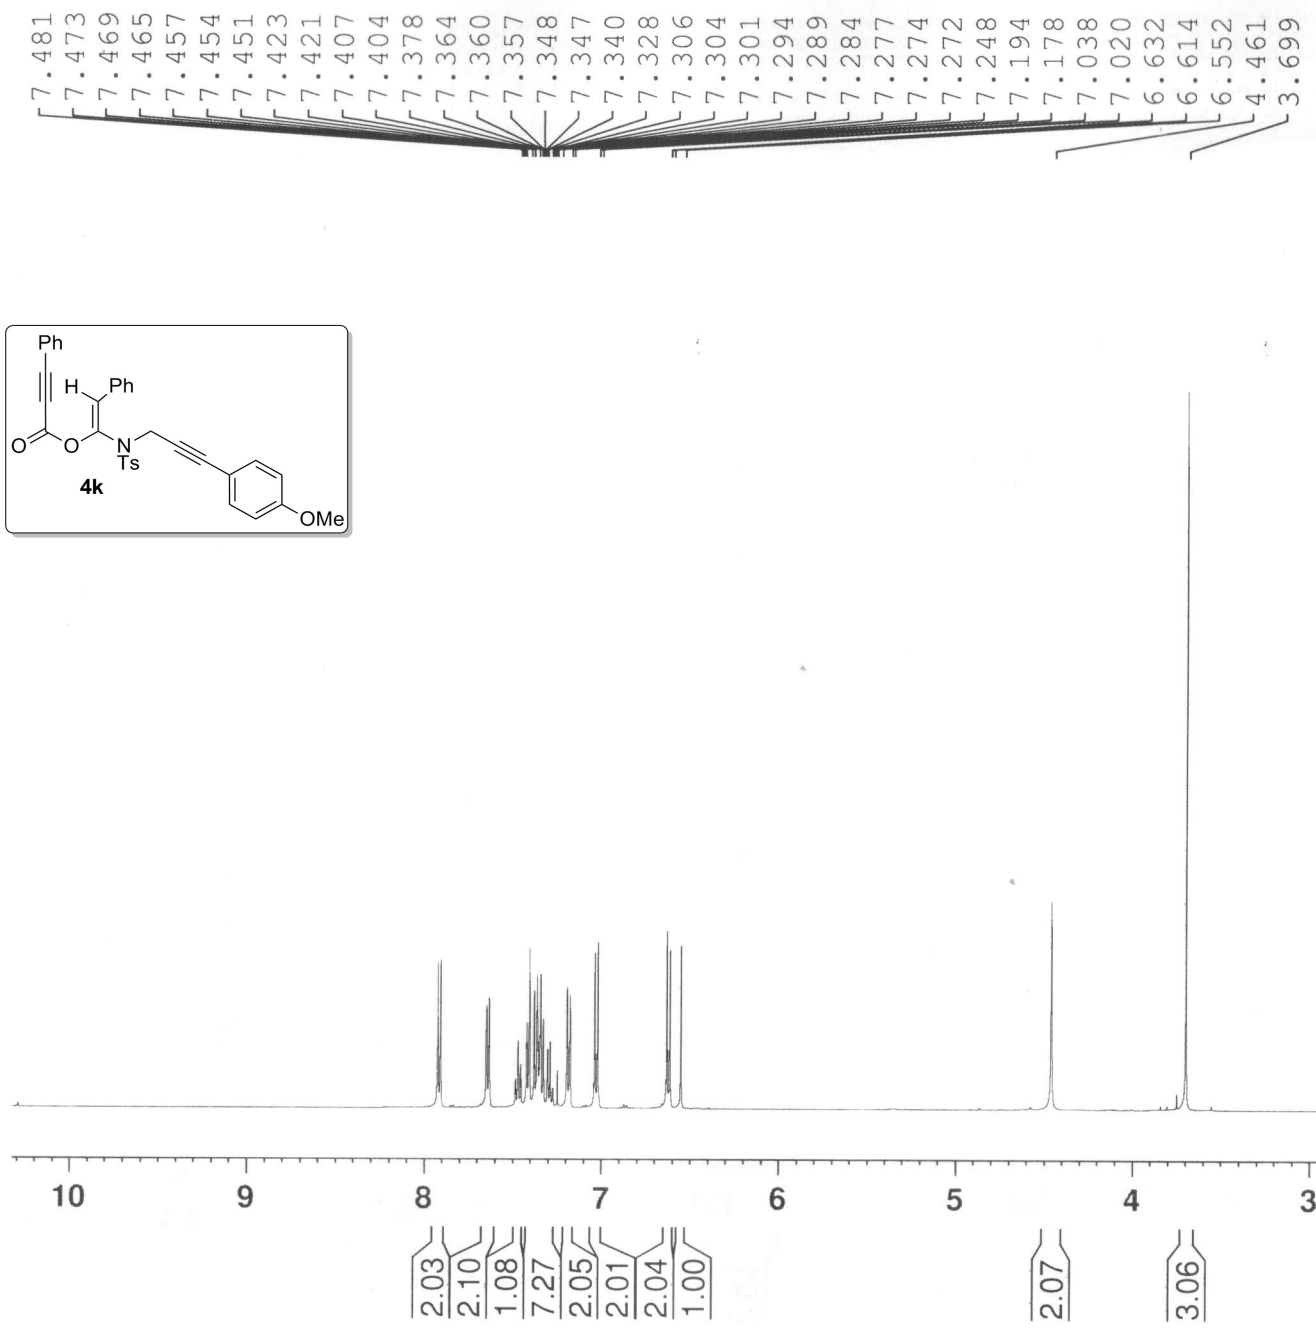

Current Data Parameters  
 NAME SD ascend 500  
 EXPNO 357  
 PROCNO 1

F2 - Acquisition Parameters  
 Date\_ 20210122  
 Time 15.26 h  
 INSTRUM spect  
 PROBHD Z119470\_0291 ( )  
 PULPROG zg30  
 TD 65536  
 SOLVENT CDCl3  
 NS 16  
 DS 2  
 SWH 10000.000 Hz  
 FIDRES 0.305176 Hz  
 AQ 3.2767999 sec  
 RG 31.25  
 DW 50.000 usec  
 DE 6.50 usec  
 TE 300.9 K  
 D1 1.00000000 sec  
 TDO 1  
 SFO1 500.3720898 MHz  
 NUC1 1H  
 P1 10.00 usec  
 PLW1 23.23100090 W

F2 - Processing parameters  
 SI 65536  
 SF 500.3690176 MHz  
 WDW EM  
 SSB 0  
 LB 0.30 Hz  
 GB 0  
 PC 1.00

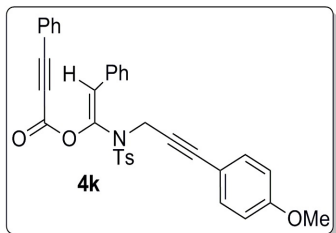

— 159.44  
 — 151.10  
 — 143.97  
 — 137.26  
 — 136.23  
 — 133.04  
 — 132.91  
 — 131.57  
 — 130.97  
 — 129.26  
 — 128.86  
 — 128.67  
 — 128.56  
 — 123.32  
 — 119.06  
 — 114.27  
 — 113.45

— 88.91  
 — 85.87  
 — 80.60  
 — 79.84  
 — 77.32  
 — 77.00  
 — 76.68

— 55.09

— 40.06

— 21.38

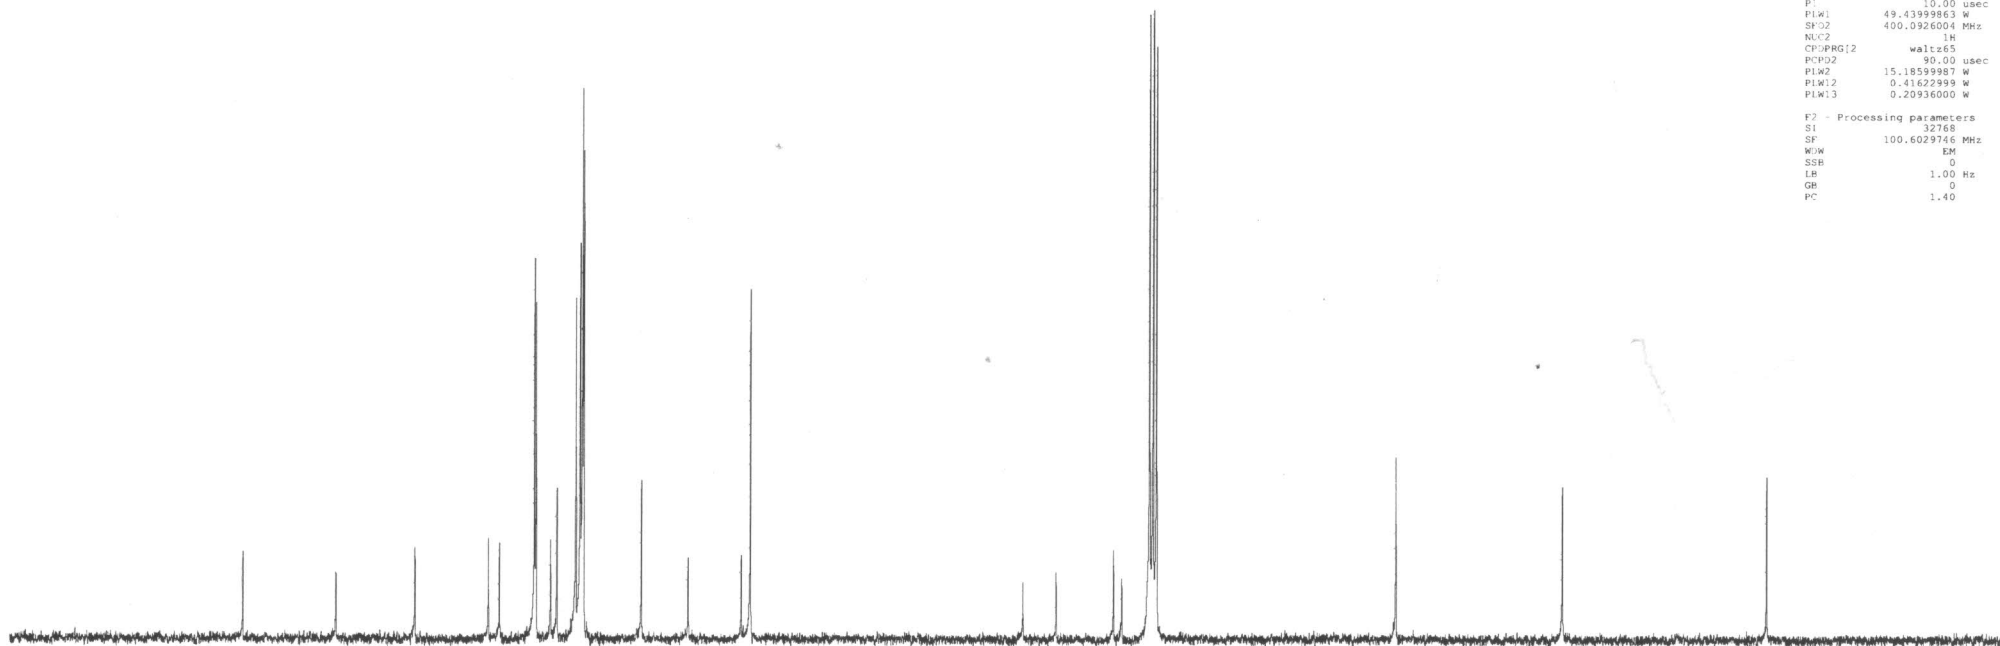

170 160 150 140 130 120 110 100 90 80 70 60 50 40 30 20 10 ppm

```

Current Data Parameters
NAME: SD UPDATED 400
EXPNO: 142
PROCNO: 1

F2 - Acquisition Parameters
Date_   20210127
Time    11:51 h
INSTRUM spect
PR: BHD Z108618_0098 (
PL1PRG0 zpgp30
TD       65536
SOLVENT  CDCl3
NS       1024
DS       4
SWH      24038.461 Hz
FIDRES   0.733596 Hz
AQ       1.3631488 sec
RG        812
AQ       20.800 usec
DE        6.50 usec
TE       295.9 K
D1       2.00000000 sec
D11      0.03000000 sec
TD0      1
SF01     100.6130223 MHz
NUC1     13C
P0       3.33 usec
P1       10.00 usec
PLW1     49.43999863 W
SF02     400.0926004 MHz
NUC2     1H
CPDPRG12 waltz65
PCPD2    90.00 usec
PLW2     15.18599987 W
PLW12    0.41622999 W
PLW13    0.20936000 W

F2 - Processing parameters
SI       32768
SF       100.6029746 MHz
WDW      EM
SSB      0
LB       1.00 Hz
GB       0
PC       1.40
  
```

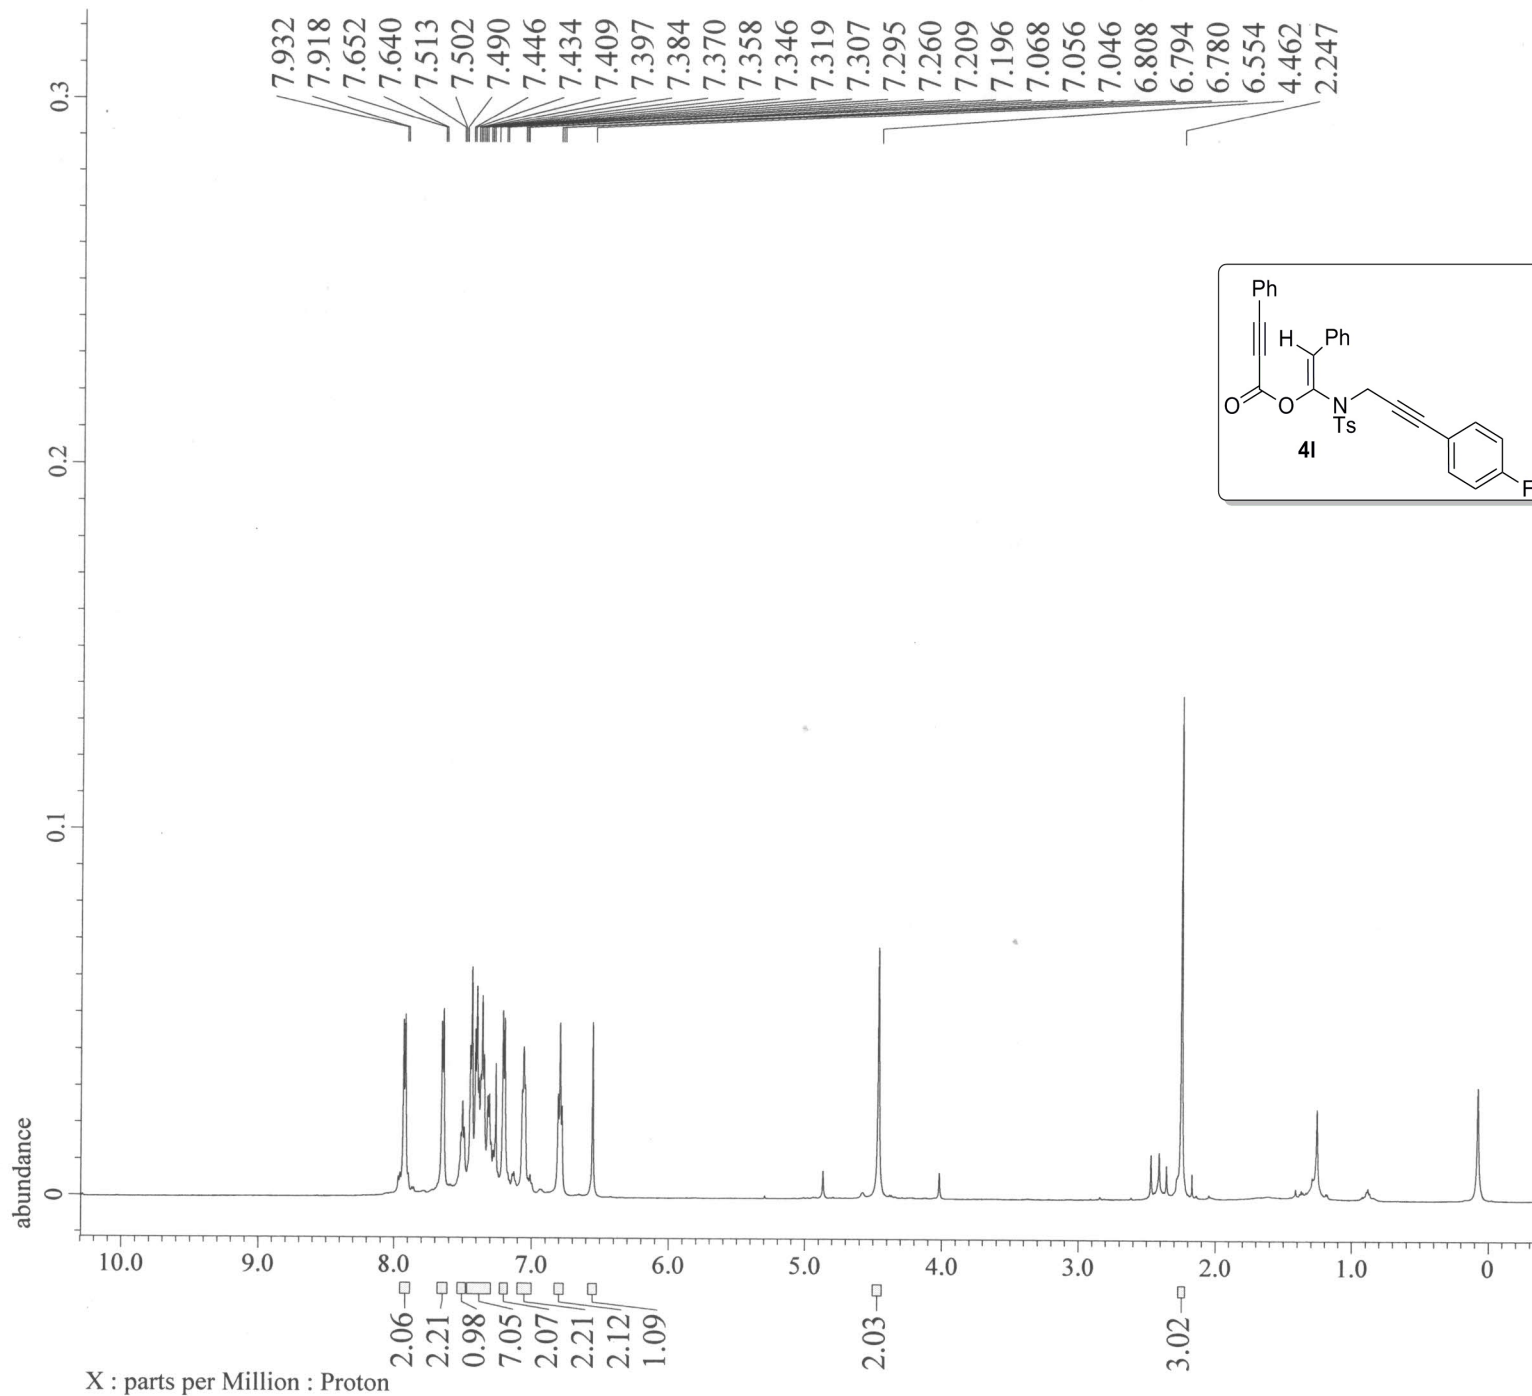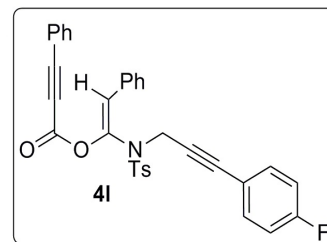

|                       |                         |
|-----------------------|-------------------------|
| Filename              | = vs-19-107_Proton-1-4. |
| Author                | = delta                 |
| Experiment            | = proton_auto.jsp       |
| Sample_Id             | = vs-19-107             |
| Solvent               | = CHLOROFORM-D          |
| Actual_Start_Time     | = 20-JAN-2021 16:56:02  |
| Revision_Time         | = 15-AUG-2021 16:10:31  |
| Comment               | = single_pulse          |
| Data_Format           | = 1D_COMPLEX            |
| Dim_Size              | = 52429                 |
| X_Domain              | = Proton                |
| Dim_Title             | = Proton                |
| Dim_Units             | = [ppm]                 |
| Dimensions            | = X                     |
| Site                  | = ACRHEM UOH            |
| Spectrometer          | = JNM-ECZ600R/M1        |
| Field_Strength        | = 14.09636928[T] (600[M |
| X_Acq_Duration        | = 0.72876032[s]         |
| X_Domain              | = Proton                |
| X_Freq                | = 600.1723046[MHz]      |
| X_Offset              | = 6.5[ppm]              |
| X_Points              | = 16384                 |
| X_Prescans            | = 1                     |
| X_Resolution          | = 1.37219326[Hz]        |
| X_Sweep               | = 22.48201439[kHz]      |
| X_Sweep_Clippped      | = 17.98561151[kHz]      |
| Irr_Domain            | = Proton                |
| Irr_Freq              | = 600.1723046[MHz]      |
| Irr_Offset            | = 5[ppm]                |
| Tri_Domain            | = Proton                |
| Tri_Freq              | = 600.1723046[MHz]      |
| Tri_Offset            | = 5[ppm]                |
| Blanking              | = 2[us]                 |
| Clipped               | = FALSE                 |
| Scans                 | = 16                    |
| Total_Scans           | = 16                    |
| Relaxation_Delay      | = 5[s]                  |
| Recvr_Gain            | = 36                    |
| Temp_Get              | = 19.4[dC]              |
| X_90_Width            | = 6.89[us]              |
| X_Acq_Time            | = 0.72876032[s]         |
| X_Angle               | = 45[deg]               |
| X_Atn                 | = 12.6[dB]              |
| X_Pulse               | = 3.445[us]             |
| Irr_Mode              | = Off                   |
| Tri_Mode              | = Off                   |
| Dante_Loop            | = 500                   |
| Dante_Presat          | = FALSE                 |
| Decimation_Rate       | = 0                     |
| Experiment_Path       | = c:\Program Files\JEOL |
| Initial_Wait          | = 1[s]                  |
| Phase                 | = {0, 90, 270, 180, 180 |
| Presat_Time           | = 5[s]                  |
| Presat_Time_Flag      | = FALSE                 |
| Relaxation_Delay_Calc | = 0[s]                  |
| Relaxation_Delay_Temp | = 5[s]                  |
| Repetition_Time       | = 5.72876032[s]         |

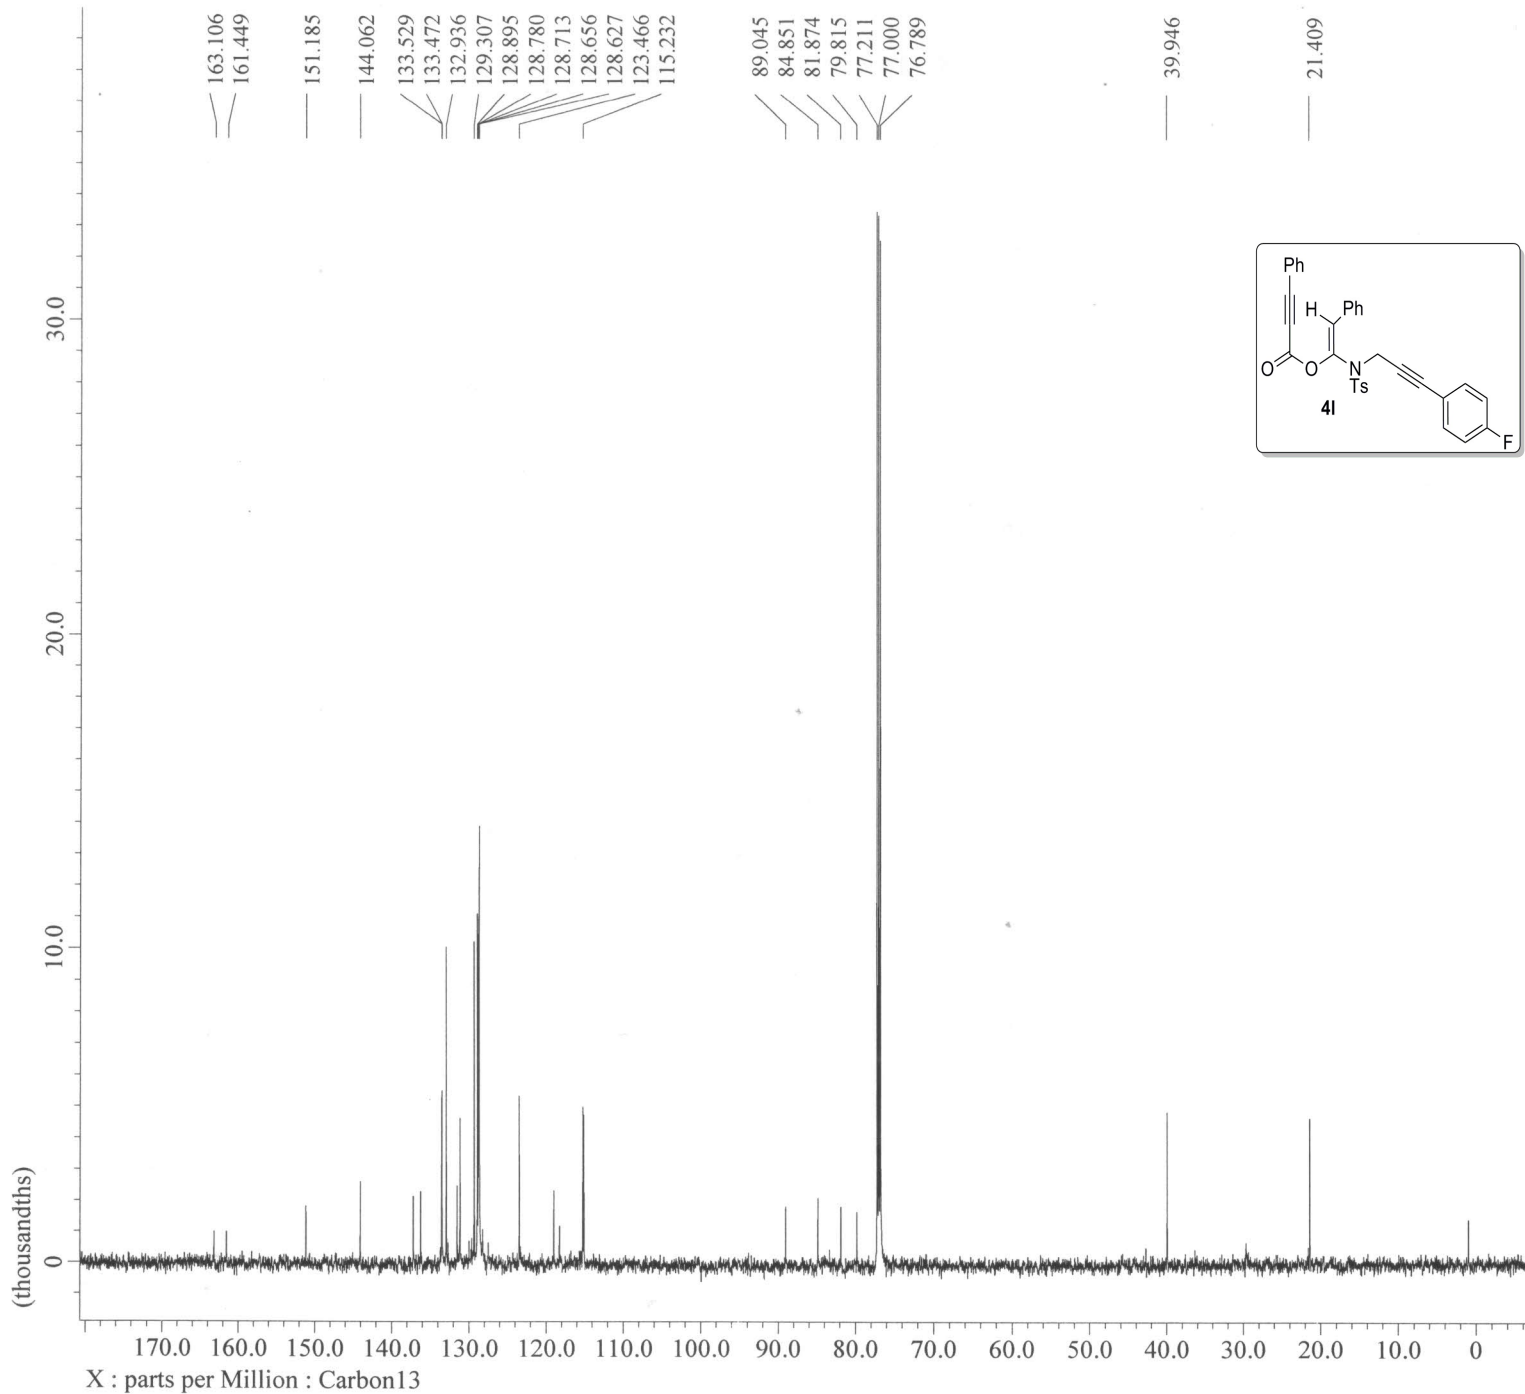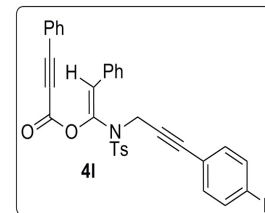

**JEOL**

Filename = vs-19-107\_Carbon-1  
 Author = delta  
 Experiment = carbon auto.jxp  
 Sample\_Id = vs-19-107  
 Solvent = CHLOROFORM-D  
 Actual\_Start\_Time = 20-JAN-2021 16:58:  
 Revision\_Time = 23-JAN-2021 19:20:

Comment = single pulse decou  
 Data\_Format = 1D COMPLEX  
 Dim\_Size = 26214  
 X\_Domain = Carbon13  
 Dim\_Title = Carbon13  
 Dim\_Units = [ppm]  
 Dimensions = X  
 Site = ACRHEM UOH  
 Spectrometer = JNM-ECZ600R/M1

Field\_Strength = 14.09636928[T] (60  
 X\_Acq\_Duration = 0.34603008[s]  
 X\_Domain = Carbon13  
 X\_Freq = 150.91343039[MHz]  
 X\_Offset = 100[ppm]  
 X\_Points = 16384  
 X\_Prescans = 4  
 X\_Resolution = 2.88992217[Hz]  
 X\_Sweep = 47.34848485[kHz]  
 X\_Sweep\_Clippped = 37.87878788[kHz]  
 Irr\_Domain = Proton  
 Irr\_Freq = 600.1723046[MHz]  
 Irr\_Offset = 5[ppm]  
 Blanking = 2[us]  
 Clipped = FALSE  
 Scans = 256  
 Total\_Scans = 256

Relaxation\_Delay = 2[s]  
 Recvr\_Gain = 56  
 Temp\_Get = 19.4[dC]  
 X\_90\_Width = 11[us]  
 X\_Acq\_Time = 0.34603008[s]  
 X\_Angle = 30[deg]  
 X\_Atn = 10.3[dB]  
 X\_Pulse = 3.66666667[us]  
 Irr\_Atn\_Dec = 33.452[dB]  
 Irr\_Atn\_Dec\_Calc = 33.452[dB]  
 Irr\_Atn\_Dec\_Default\_Calc = 33.452[dB]  
 Irr\_Atn\_No = 33.452[dB]  
 Irr\_Dec\_Bandwidth\_Hz = 7.23684211[kHz]  
 Irr\_Dec\_Bandwidth\_Ppm = 12.05794078[ppm]  
 Irr\_Dec\_Freq = 600.1723046[MHz]  
 Irr\_Dec\_Merit\_Factor = 2.2  
 Irr\_Decoupling = TRUE  
 Irr\_No = TRUE  
 Irr\_Noise = WALTZ  
 Irr\_Offset\_Default = 5[ppm]  
 Irr\_Pwidth = 76[us]  
 Irr\_Pwidth\_Default = 76[us]  
 Irr\_Pwidth\_Default\_Calc = 76[us]  
 Irr\_Pwidth\_Temp1 = 76[us]  
 Irr\_Wurst = FALSE  
 Decimation\_Rate = 0

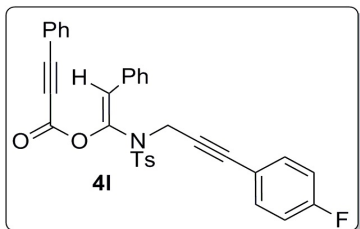

— -110.18

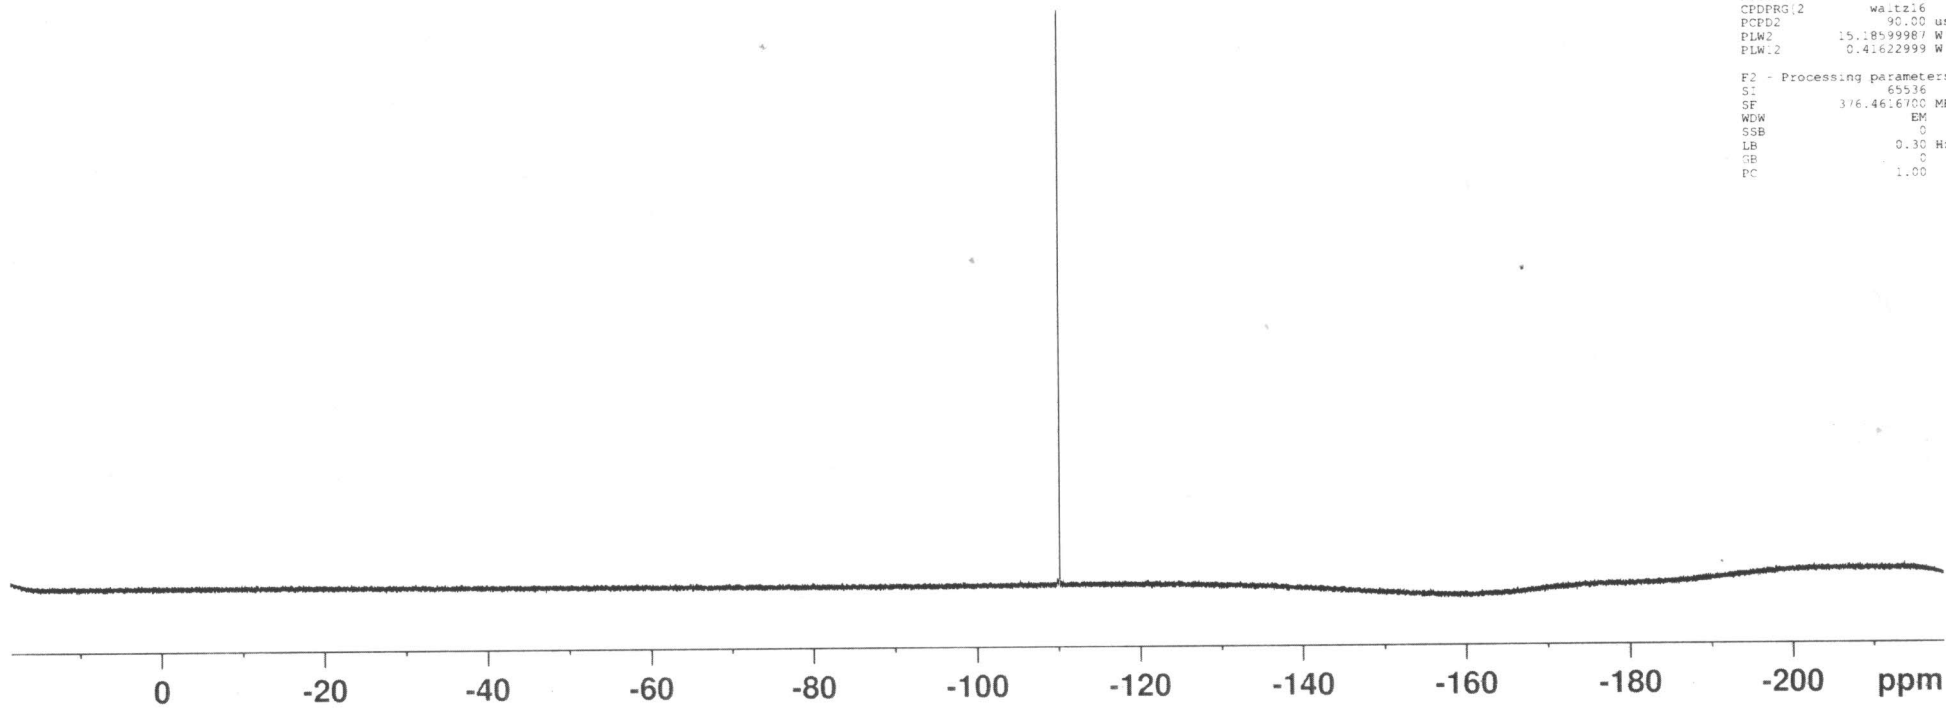

```

Current Data Parameters
NAME      K SURESH UPDATED 400
EXPNO    108
PROCNO   1

F2 - Acquisition Parameters
Date_    20211103
Time     16.17 h
INSTRUM  spect
PROBHD   Z108618-0098 (
PULPROG  zgpg30n.2
TD       131072
SOLVENT  CDCl3
NS       32
DS       4
SWH      89285.711 Hz
FIDRES   1.362392 Hz
AQ       0.7340032 sec
RG       724
DW       5.600 usec
DE       6.50 usec
TE       580.1 K
D1       1.0000000 sec
D11      0.0300000 sec
D12      0.0000200 sec
TDC      1
SFO1     376.4240234 MHz
NUC1     19F
P1       14.80 usec
PLW1     18.11000061 W
SFO2     400.0926004 MHz
NUC2     1H
PCPD2    waitz1.6
PLW2     15.18599987 W
PLW12    0.41622999 W

F2 - Processing parameters
SI       65536
SF       376.4616700 MHz
WDW      EM
SSB      0
LB       0.30 Hz
GB       0
PC       1.00

```

7.931  
7.915  
7.648  
7.633  
7.522  
7.517  
7.511  
7.508  
7.504  
7.499  
7.492  
7.487  
7.422  
7.419  
7.410  
7.405  
7.398  
7.394  
7.382  
7.375  
7.373  
7.370  
7.359  
7.356  
7.344  
7.323  
7.321  
7.319  
7.311  
7.307  
7.301  
7.294  
7.292  
7.260  
7.234  
7.231  
7.221  
7.217  
7.198  
6.935  
6.931  
6.927  
6.918  
6.914  
6.910  
6.551  
4.458  
2.253

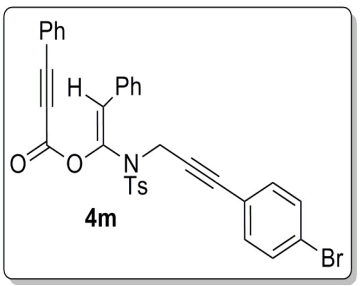

Current Data Parameters  
 NAME K SURESH UPDATED 500  
 EXPNO 116  
 PROCNO 1

F2 - Acquisition Parameters  
 Date\_ 20210722  
 Time 13.22 h  
 INSTRUM spect  
 PROBHD Z109128\_0042 ( )  
 PULPROG zg30  
 TD 65536  
 SOLVENT CDCl3  
 NS 16  
 DS 2  
 SWH 10000.000 Hz  
 FIDRES 0.305176 Hz  
 AQ 3.2767999 sec  
 RG 144  
 DW 50.000 usec  
 DE 13.04 usec  
 TE 297.1 K  
 D1 1.00000000 sec  
 TDO 1  
 SFO1 500.1830886 MHz  
 NUC1 1H  
 P0 5.00 usec  
 P1 15.00 usec  
 PLW1 4.84679985 W

F2 - Processing parameters  
 SI 65536  
 SF 500.1800110 MHz  
 WDW EM  
 SSB 0  
 LB 0.30 Hz  
 GB 0  
 PC 1.00

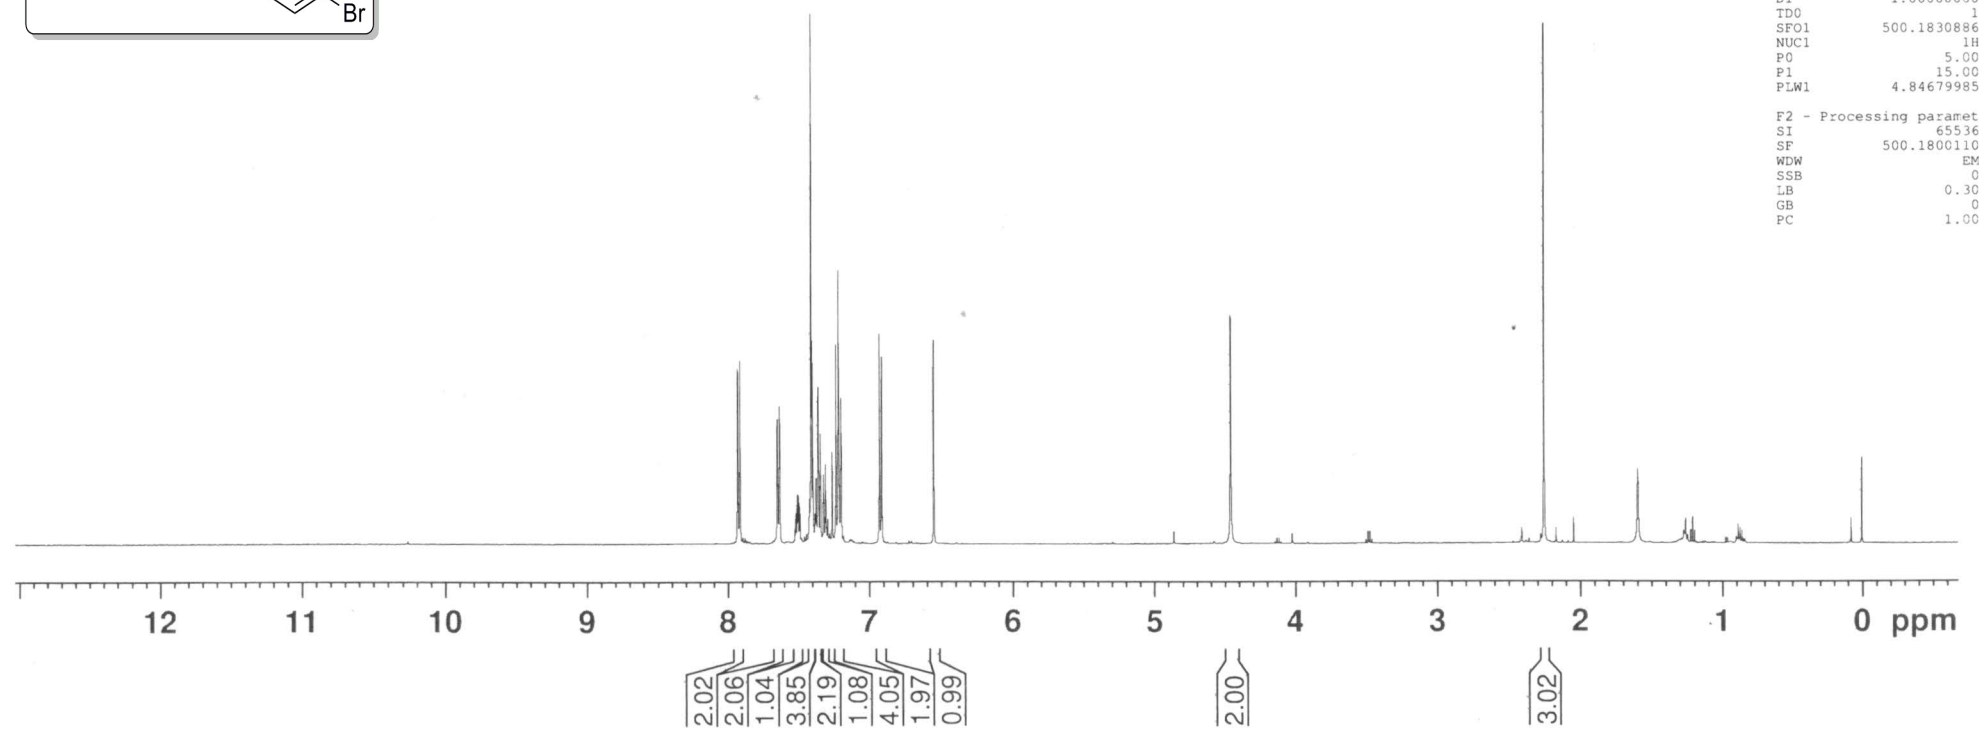

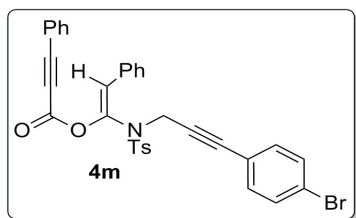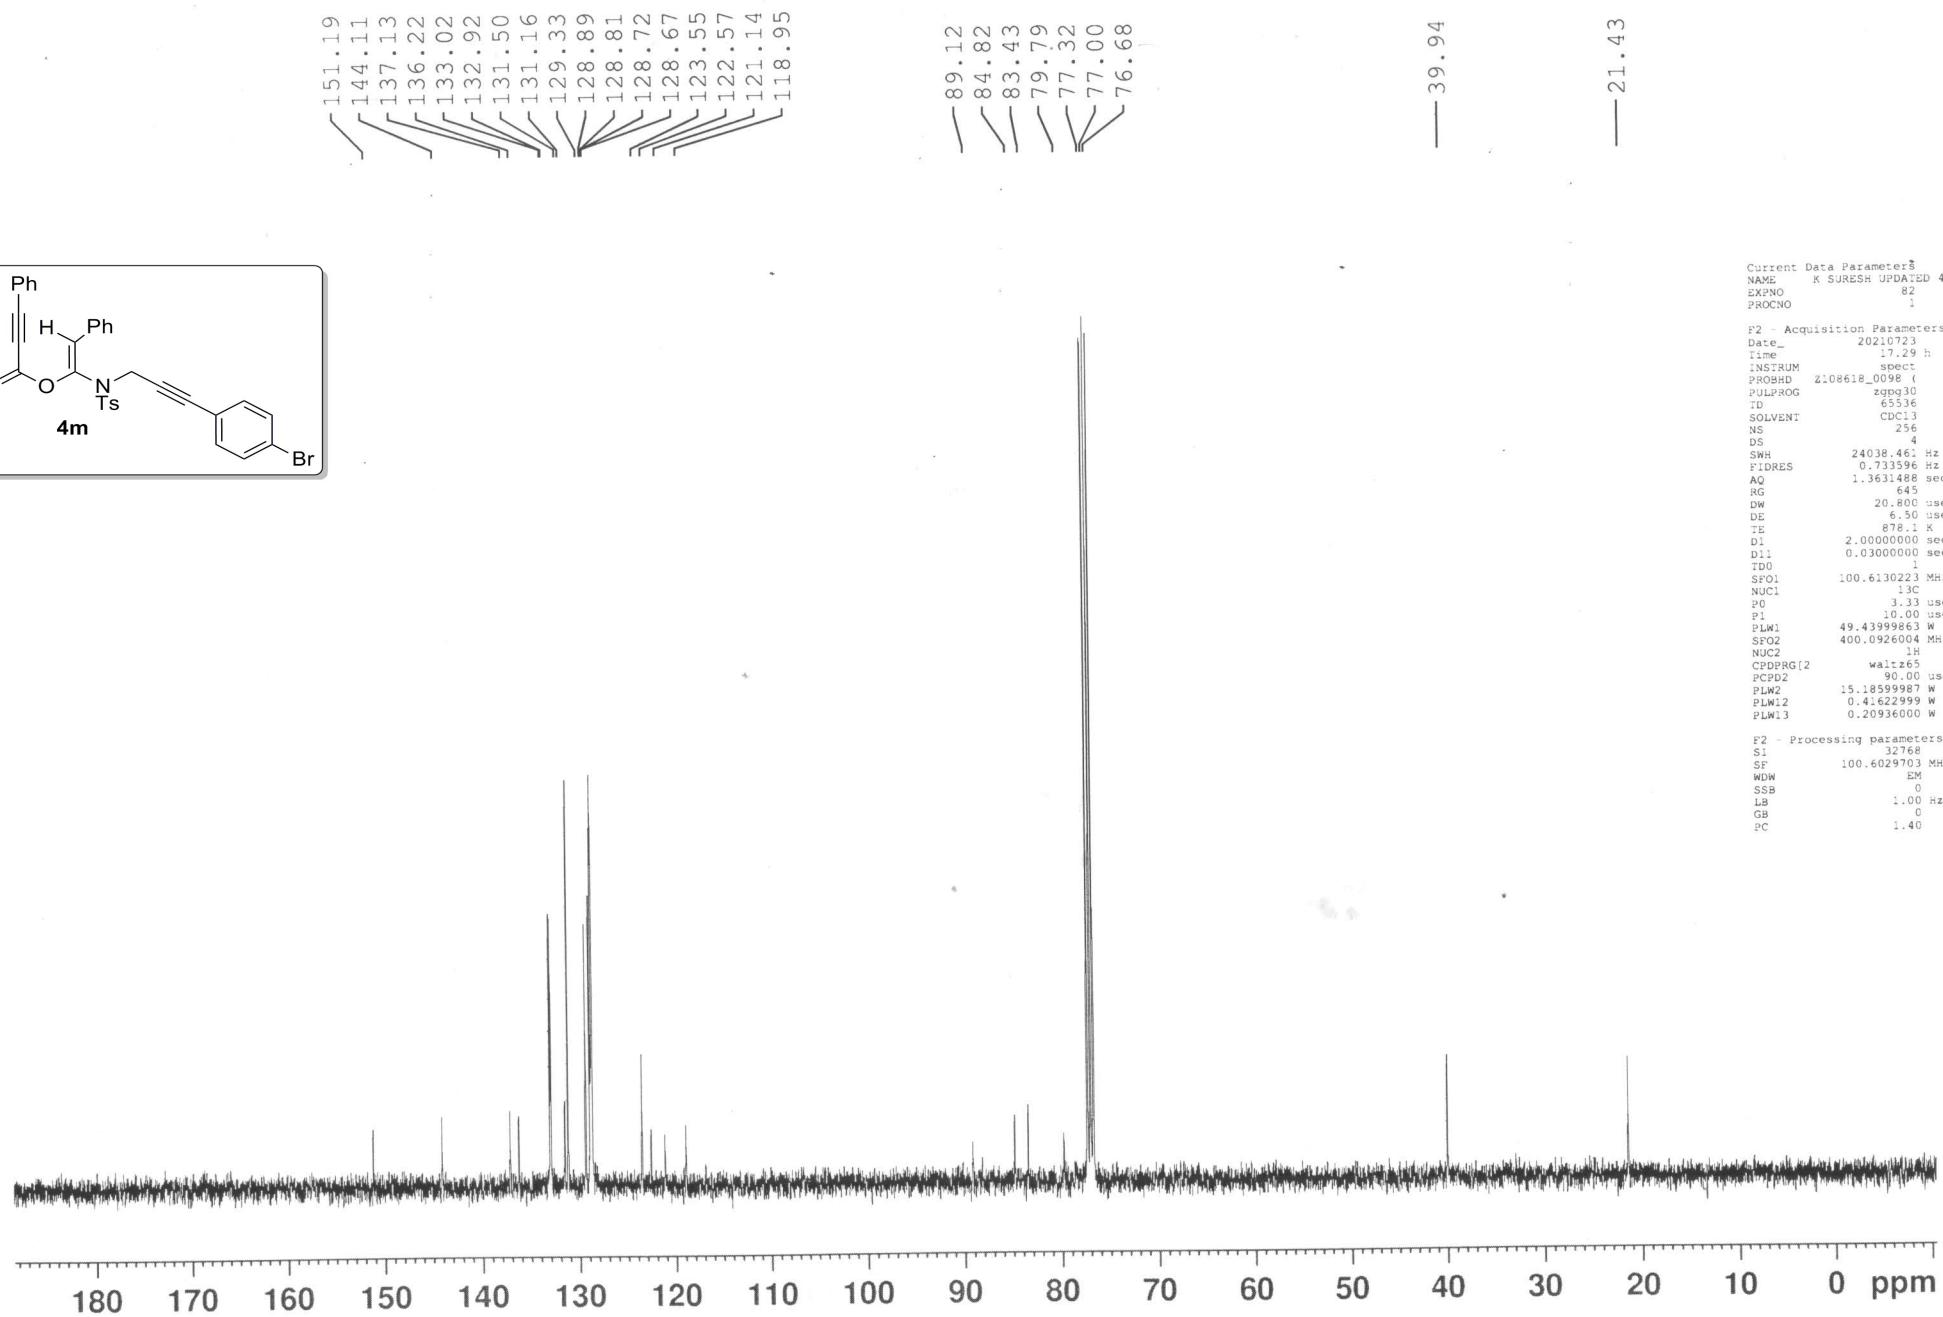

Current Data Parameters  
NAME K SURESH UPDATED 400  
EXPNO 82  
PROCNO 1

F2 - Acquisition Parameters  
Date\_ 20210723  
Time 17.29 h  
INSTRUM spect  
PROBHD Z108618\_0098 ( )  
PULPROG zgpg30  
TD 65536  
SOLVENT CDCl3  
NS 256  
DS 4  
SWH 24038.461 Hz  
FIDRES 0.733596 Hz  
AQ 1.3631488 sec  
RG 645  
DW 20.800 usec  
DE 6.50 usec  
TE 878.1 K  
D1 2.0000000 sec  
D11 0.0300000 sec  
TDO 1  
SFO1 100.6130223 MHz  
NUC1 13C  
P0 3.33 usec  
P1 10.00 usec  
PLM1 49.43999863 W  
SFO2 400.0926004 MHz  
NUC2 1H  
CPDPRG[2] waltz165  
PCPD2 90.00 usec  
PLM2 15.18599987 W  
PLM12 0.41622999 W  
PLM13 0.20936000 W

F2 - Processing parameters  
SI 32768  
SF 100.6029703 MHz  
WDW EM  
SSB 0  
LB 1.00 Hz  
GB 0  
PC 1.40



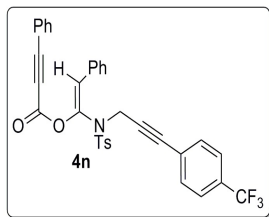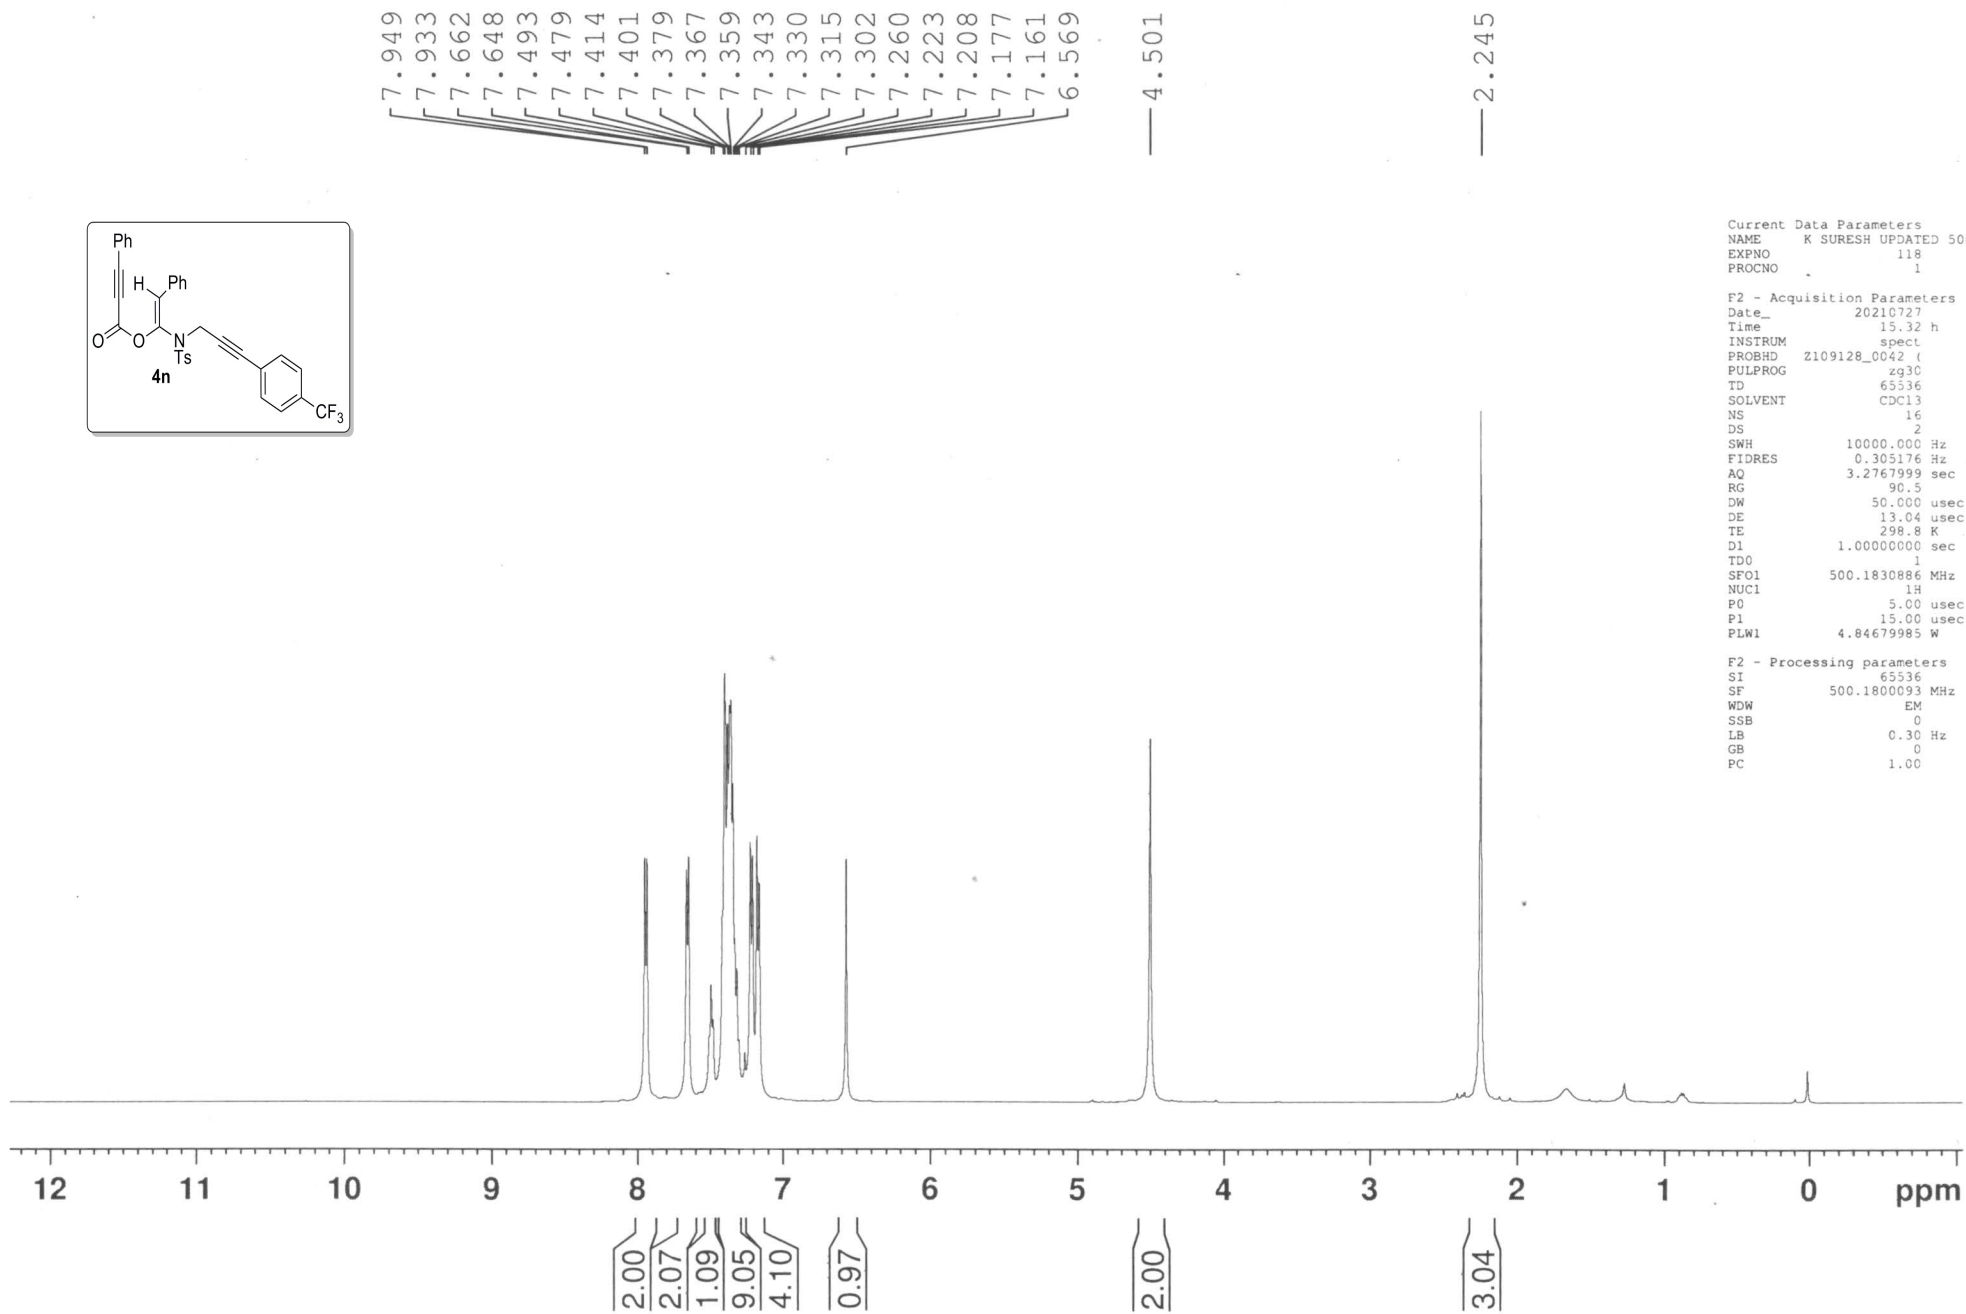

Current Data Parameters  
NAME K SURESH UPDATED 500  
EXPNO 118  
PROCNO 1

F2 - Acquisition Parameters  
Date\_ 20210727  
Time 15.32 h  
INSTRUM spect  
PROBHD Z109128\_0042 ( )  
PULPROG zg30  
TD 65536  
SOLVENT CDC13  
NS 16  
DS 2  
SWH 10000.000 Hz  
FIDRES 0.305176 Hz  
AQ 3.2767999 sec  
RG 90.5  
DW 50.000 usec  
DE 13.04 usec  
TE 298.8 K  
D1 1.00000000 sec  
TD0 1  
SFO1 500.1830886 MHz  
NUC1 1H  
PC 5.00 usec  
PI 15.00 usec  
PLW1 4.84679985 W

F2 - Processing parameters  
SI 65536  
SF 500.1800093 MHz  
WDW EM  
SSB 0  
LB 0.30 Hz  
GB 0  
PC 1.00

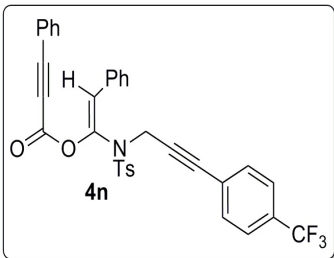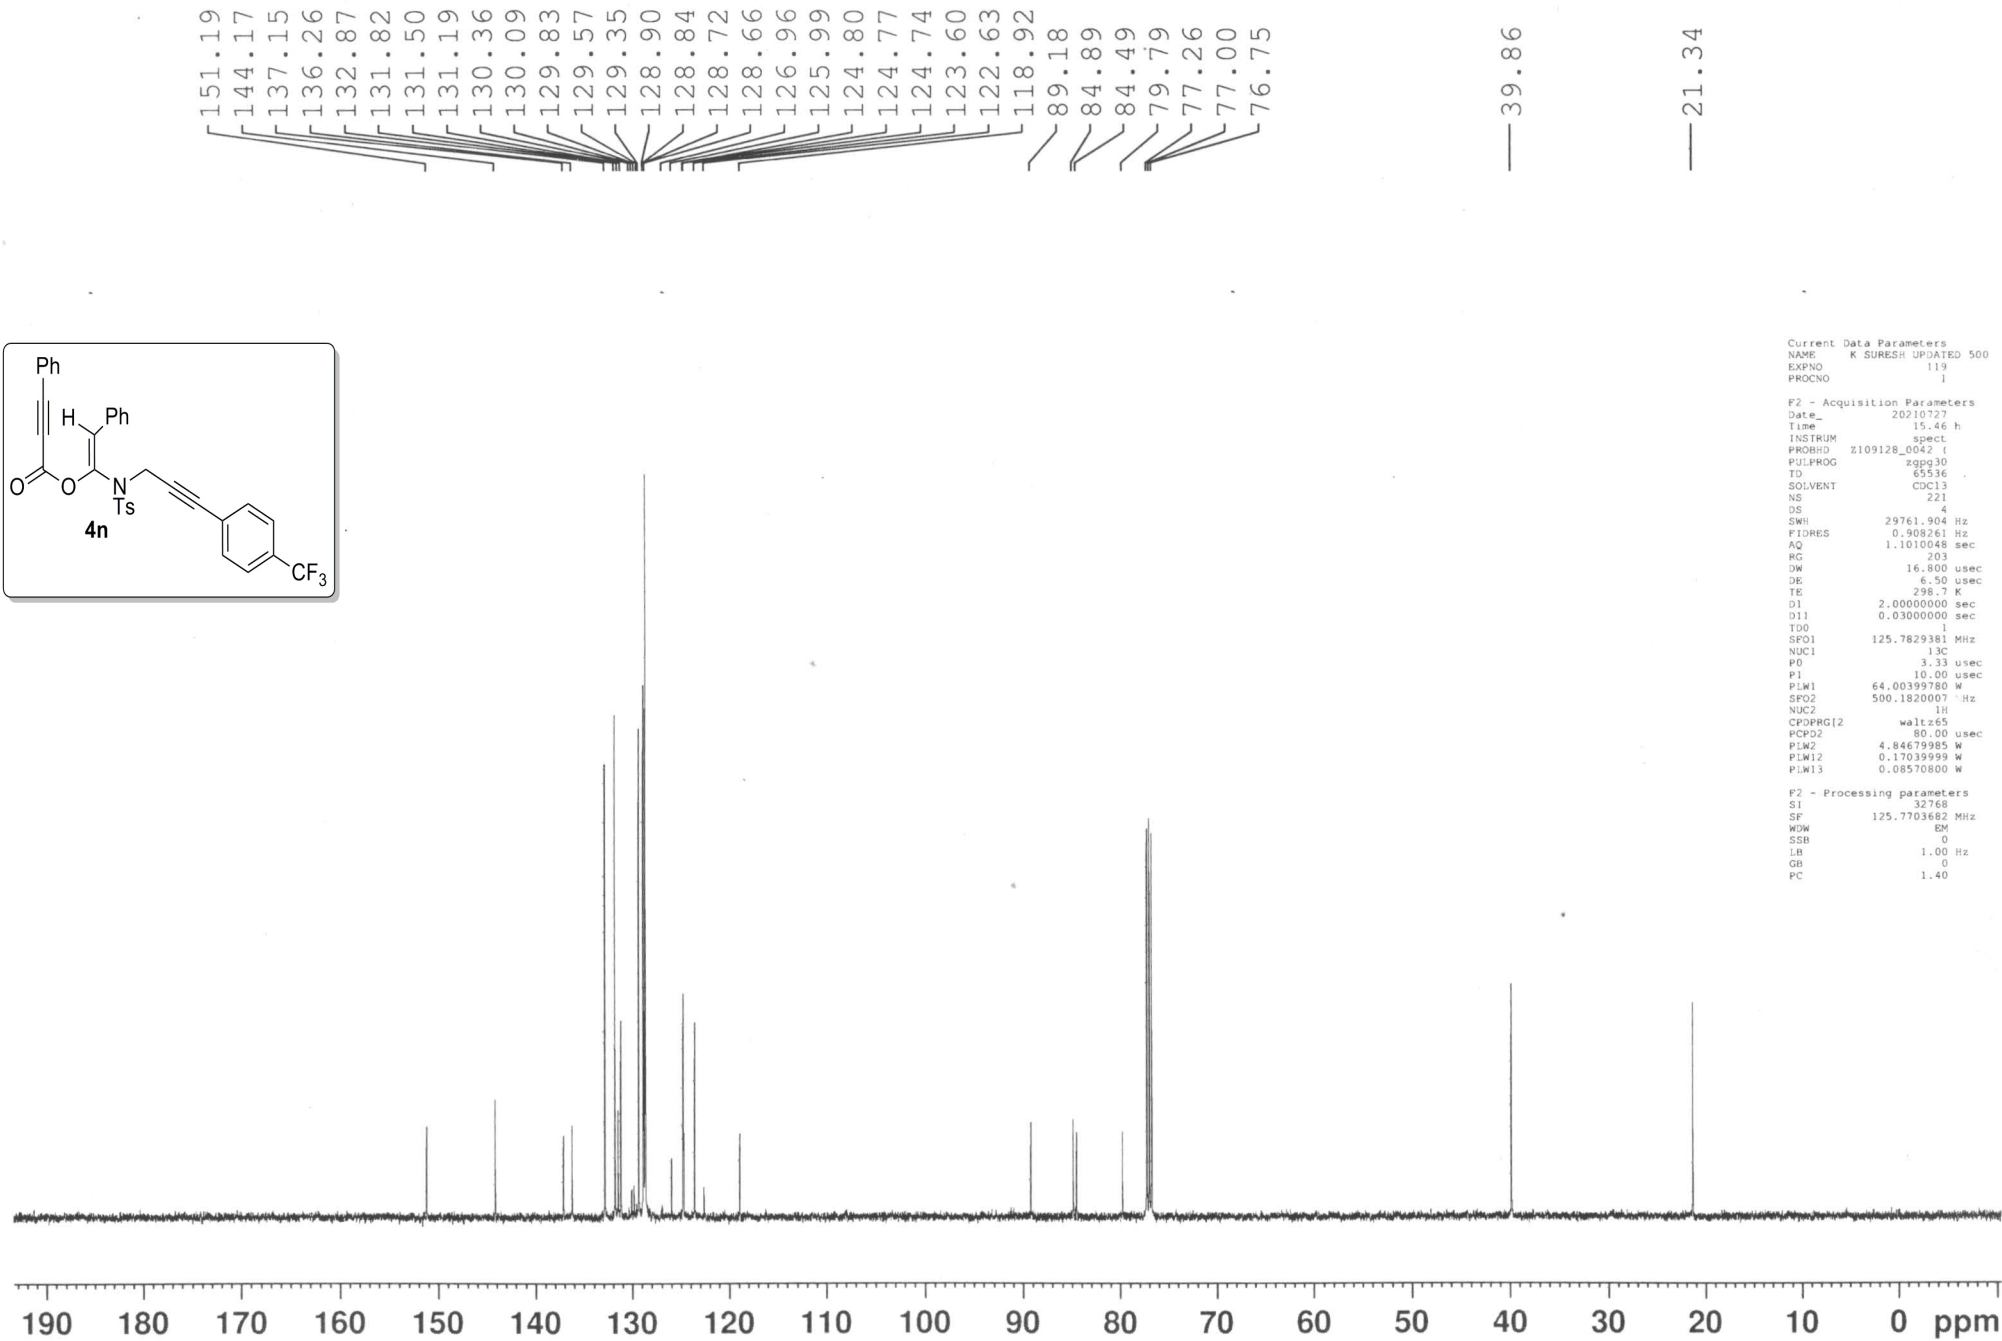

Current Data Parameters  
 NAME K SURESH UPDATED 500  
 EXPNO 119  
 PROCNO 1

F2 - Acquisition Parameters  
 Date\_ 20210727  
 Time 15:46 h  
 INSTRUM spect  
 PROBHD Z109128\_0042 f  
 PULPROG zgpg30  
 TD 65536  
 SOLVENT CDCl3  
 NS 221  
 DS 4  
 SWH 29761.904 Hz  
 FIDRES 0.908261 Hz  
 AQ 1.1010048 sec  
 RG 203  
 DW 16.800 usec  
 DE 6.50 usec  
 TE 298.7 K  
 D1 2.00000000 sec  
 D11 0.03000000 sec  
 TD0 1  
 SFO1 125.7629381 MHz  
 NUC1 13C  
 P0 3.33 usec  
 P1 10.00 usec  
 PLW1 64.00399780 W  
 SFO2 500.1820007 Hz  
 NUC2 1H  
 CPDPRG12 waltz65  
 PCPD2 80.00 usec  
 PLW2 4.84679985 W  
 PLW12 0.17039999 W  
 PLW13 0.08570800 W

F2 - Processing parameters  
 SI 32768  
 SF 125.7703682 MHz  
 WDW EM  
 SSB 0  
 LB 1.00 Hz  
 GB 0  
 PC 1.40

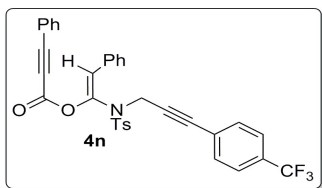

— -62.94

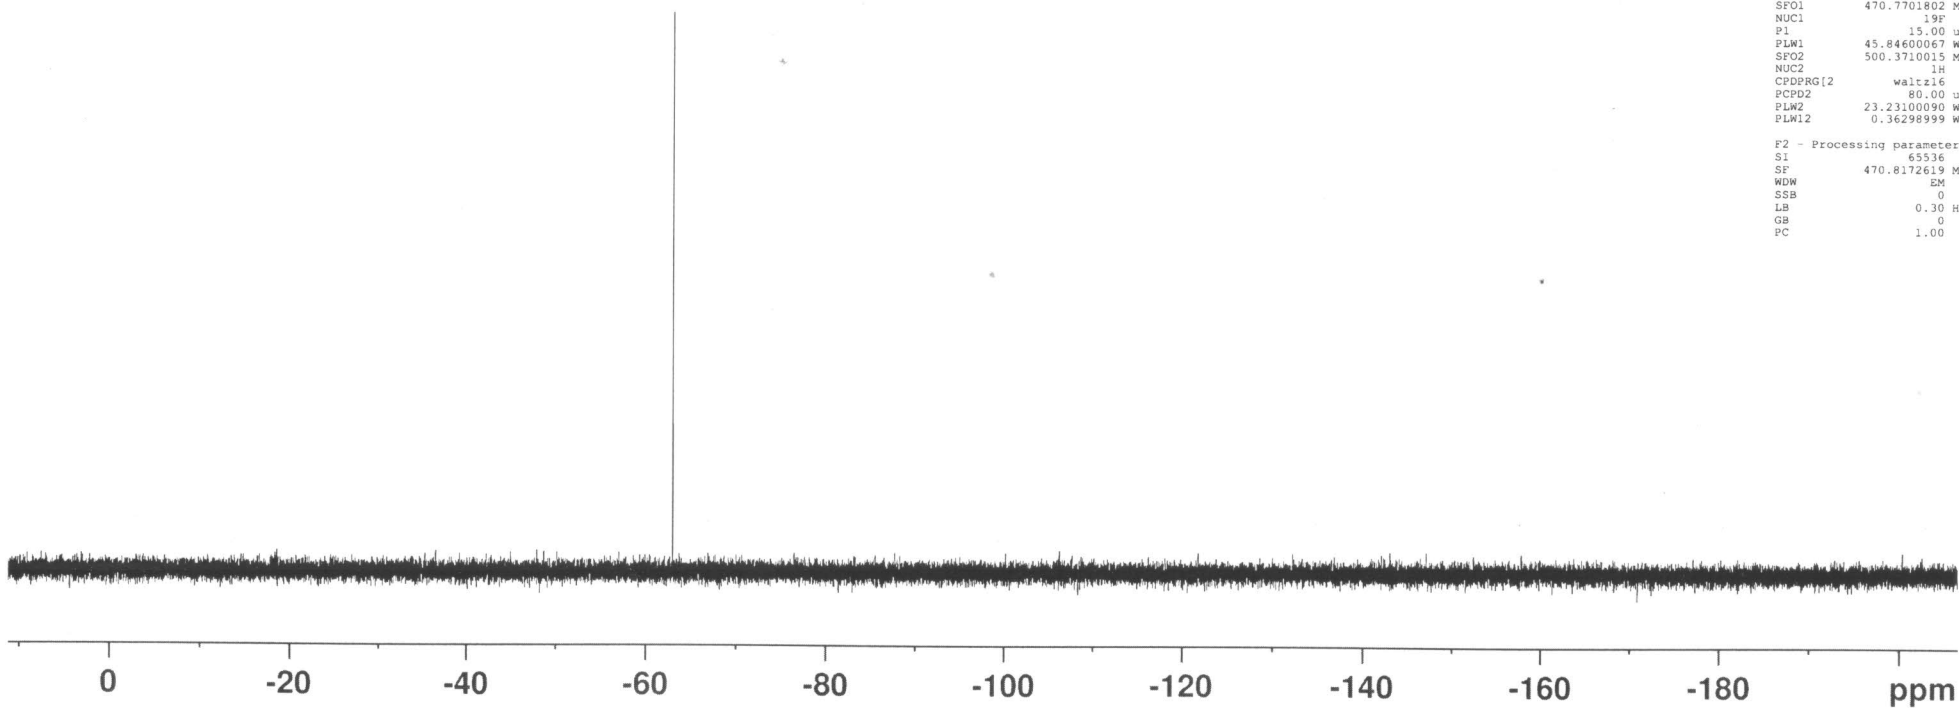

```

Current Data Parameters
NAME      K Suresh Ascend 500
EXPNO     125
PROCNO    1

F2 - Acquisition Parameters
Date_     20210728
Time      15.15 h
INSTRUM   spect
PROBHD    z119470_0291 (
PULPROG   zgpg30qgn.2
TD         131072
SOLVENT    CDCl3
NS         32
DS         4
SWH        113636.367 Hz
FIDRES     1.733953 Hz
AQ         0.5767168 sec
RG         7.96
DM         4.400 usec
DE         6.50 usec
TE         298.6 K
D1         1.00000000 sec
D11        0.03000000 sec
D12        0.00002000 sec
TD0        1
SFO1       470.7701802 MHz
NUC1       19F
P1         15.00 usec
PLW1       45.84600067 W
SFO2       500.3710015 MHz
NUC2       1H
CPDPRG2    waltz16
PCPD2      80.00 usec
PLW2       23.23100090 W
PLW12      0.36298999 W

F2 - Processing parameters
SI         65536
SF         470.8172619 MHz
WDW        EM
SSB        0
LB         0.30 Hz
GB         0
PC         1.00

```

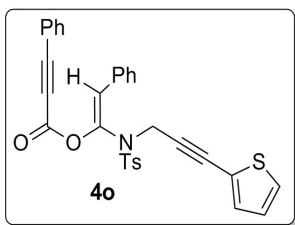

7.930  
7.914  
7.643  
7.629  
7.501  
7.486  
7.468  
7.452  
7.401  
7.386  
7.372  
7.358  
7.343  
7.318  
7.303  
7.289  
7.260  
7.222  
7.206  
7.129  
7.119  
6.943  
6.938  
6.820  
6.813  
6.811  
6.804  
6.551  
4.491

— 2.254

Current Data Parameters  
NAME RP UPDATED 500  
EXPNO 42  
PROCNO 1

F2 - Acquisition Parameters  
Date\_ 20210802  
Time 16.40 h  
INSTRUM spect  
PROBHD Z109128\_0042 ( )  
PULPROG zg30  
TD 65536  
SOLVENT CDC13  
NS 16  
DS 2  
SWH 10000.000 Hz  
FIDRES 0.305176 Hz  
AQ 3.2767999 sec  
RG 114  
DW 50.000 usec  
DE 13.04 usec  
TE 297.5 K  
D1 1.00000000 sec  
TD0 1  
SFO1 500.1830886 MHz  
NUC1 1H  
PC 5.00 usec  
P1 15.00 usec  
PLW1 4.84679985 W

F2 - Processing parameters  
SI 65536  
SF 500.1800095 MHz  
WDW EM  
SSB 0  
LB 0.30 Hz  
GB 0  
PC 1.00

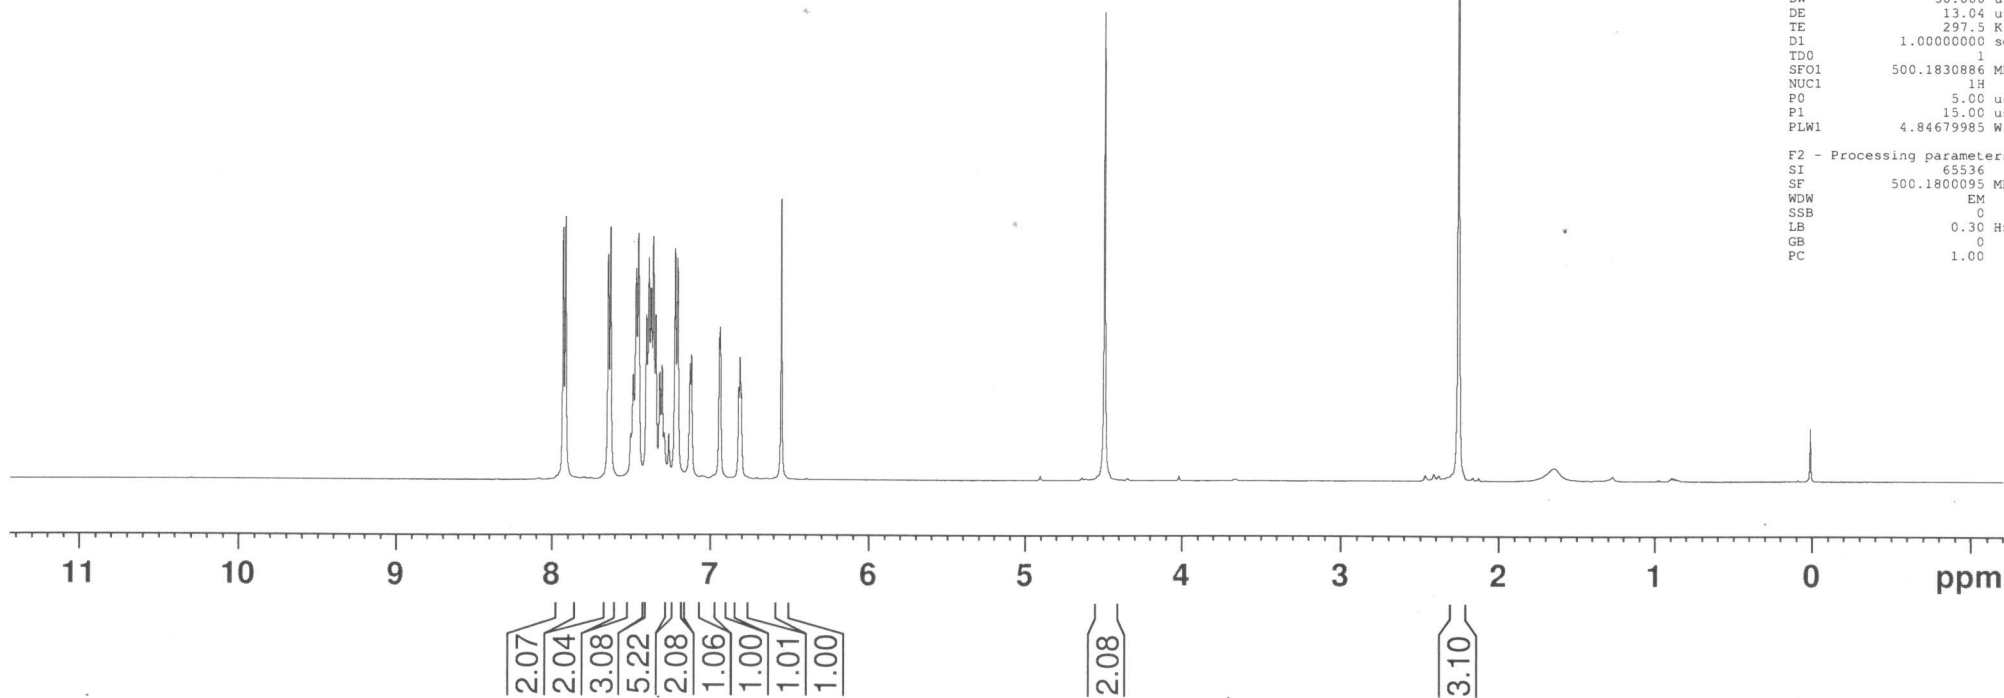

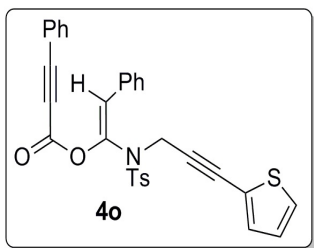

151.14  
144.16  
137.36  
136.16  
132.96  
132.48  
131.53  
131.00  
129.40  
128.85  
128.73  
128.60  
127.18  
126.59  
123.18  
122.14  
119.16

89.06  
86.10  
79.79  
79.27  
77.26  
77.00  
76.75

—40.21

—21.44

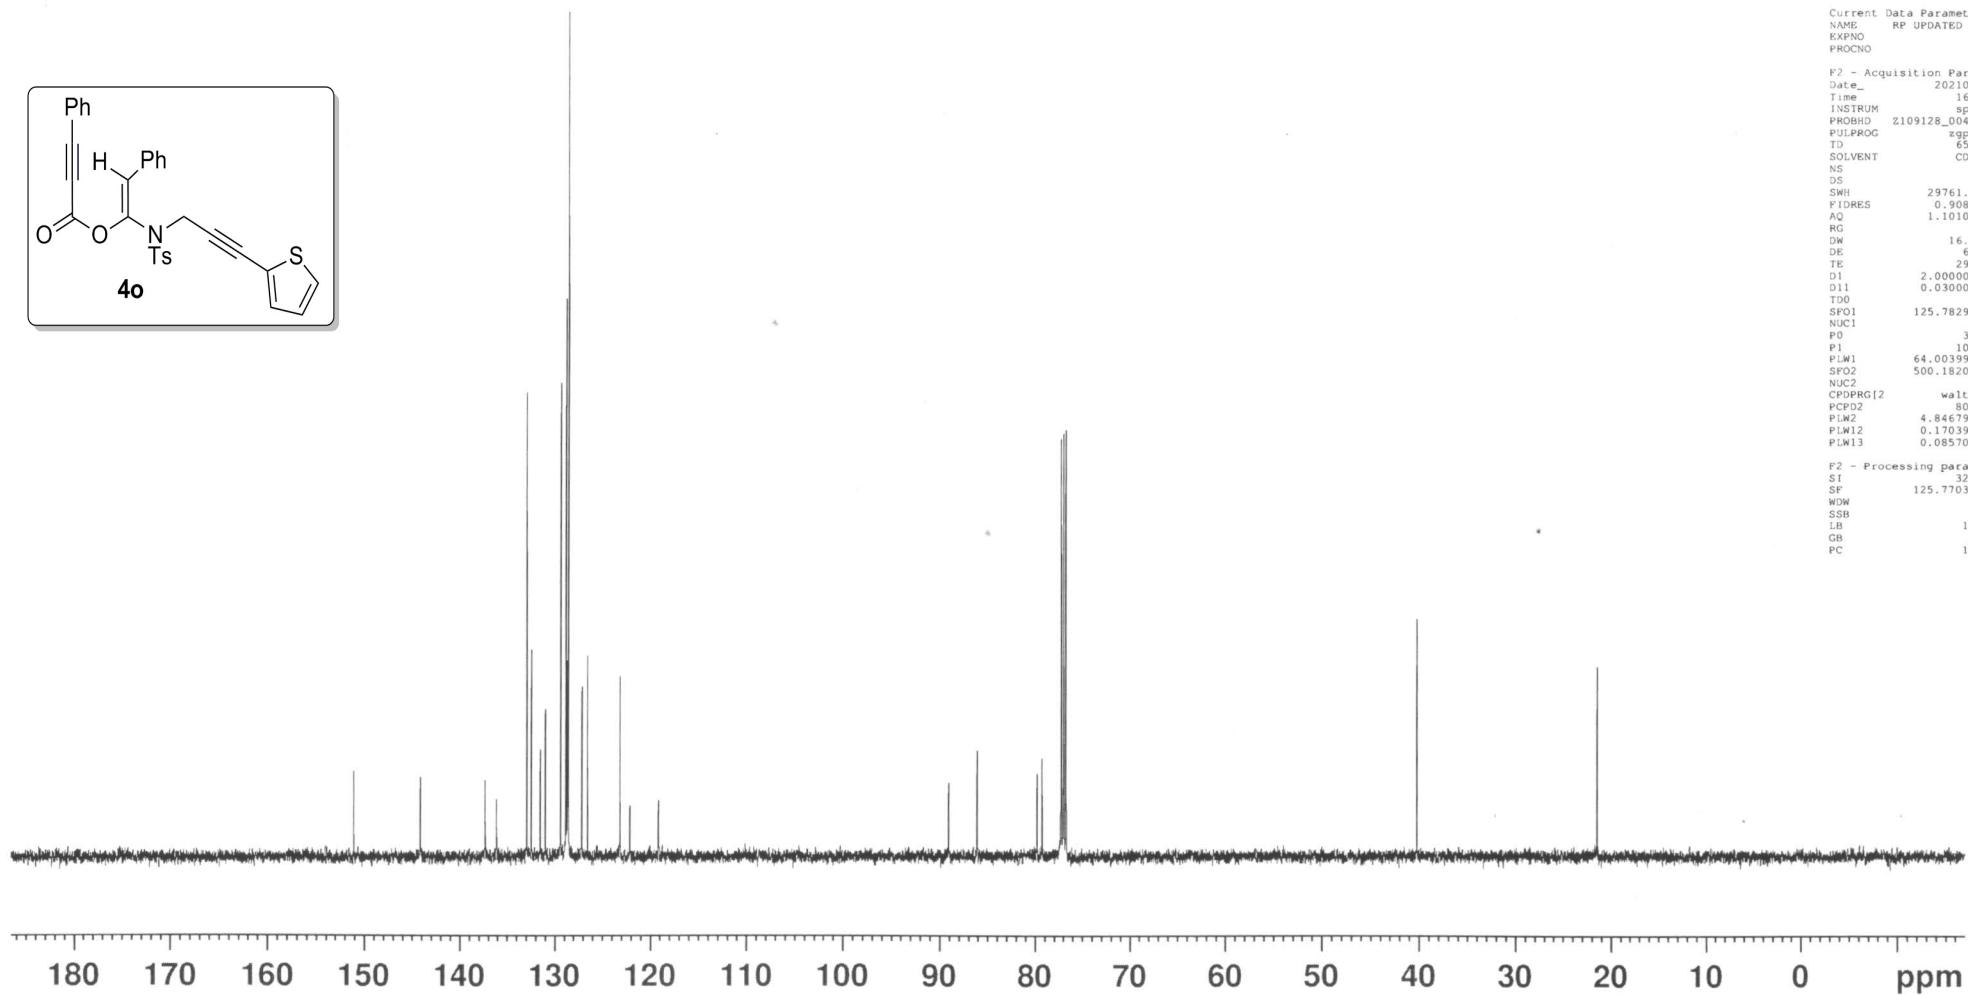

Current Data Parameters  
NAME RP UPDATED 500  
EXPNO 43  
PROCNO 1

F2 - Acquisition Parameters  
Date\_ 20210802  
Time 16.50 h  
INSTRUM spect  
PROBHD Z109128\_0042 ( )  
PULPROG zgpg30  
TD 65536  
SOLVENT CDCl3  
NS 182  
DS 4  
SWH 29761.904 Hz  
FIDRES 0.908261 Hz  
AQ 1.1010048 sec  
RG 203  
DW 16.800 usec  
DE 6.50 usec  
TE 298.6 K  
D1 2.0000000 sec  
D11 0.0300000 sec  
TDO 1  
SFO1 125.7829381 MHz  
NUC1 13C  
P0 3.33 usec  
P1 10.00 usec  
PLW1 64.00399780 W  
SFO2 500.1820007 MHz  
NUC2 1H  
CPDPRG12 waltz65  
PCPD2 80.00 usec  
PLW2 4.84679985 W  
PLW12 0.17039999 W  
PLW13 0.08570800 W

F2 - Processing parameters  
SI 32768  
SF 125.7703681 MHz  
WDW EM  
SSB 0  
LB 1.00 Hz  
GB 0  
PC 1.40

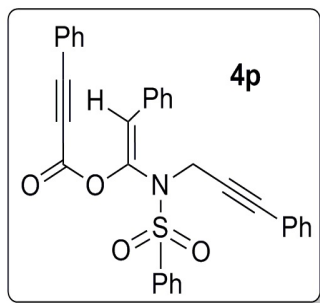

7.984  
7.970  
7.575  
7.561  
7.397  
7.393  
7.382  
7.379  
7.360  
7.349  
7.346  
7.343  
7.337  
7.334  
7.307  
7.292  
7.276  
7.260  
7.237  
7.235  
7.233  
7.220  
7.023  
6.493

— 4.421

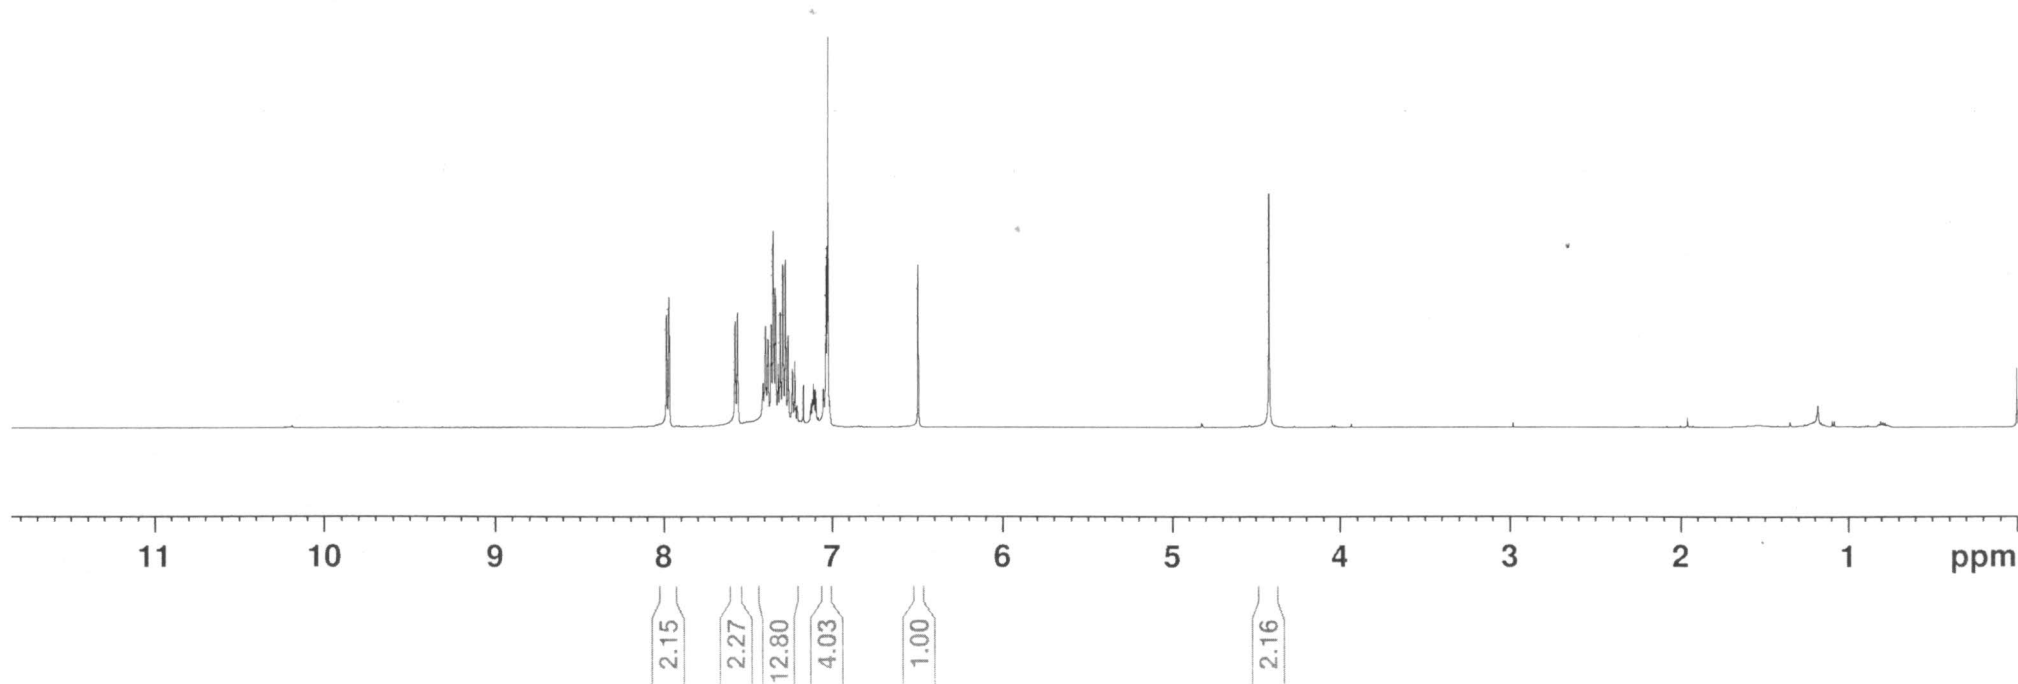

Current Data Parameters  
NAME SD ASCEND 500  
EXPNO 379  
PROCNO 1

F2 - Acquisition Parameters  
Date\_ 20210315  
Time 17:10 h  
INSTRUM spect  
PROBHD z119470\_0291 (0  
PULPROG zg30  
ID 65536  
SOLVENT CDC13  
NS 16  
DS 2  
SWH 10000.000 Hz  
FIDRES 0.305176 Hz  
AQ 3.2767999 sec  
RG 31.25  
DW 50.000 usec  
DE 6.50 usec  
TE 296.9 K  
D1 1.0000000 sec  
TD 1  
SFO1 500.3720898 MHz  
NUC1 1H  
P1 10.00 usec  
PLW1 23.23100090 W

F2 - Processing parameters  
S1 65536  
SF 500.3690574 MHz  
WDW EM  
SSB 0  
LB 0.30 Hz  
GB 0  
PC 1.00

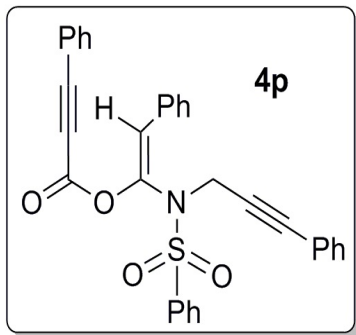

151.09  
139.26  
137.19  
133.10  
132.95  
131.59  
131.53  
131.02  
128.86  
128.78  
128.69  
128.64  
128.60  
128.58  
128.29  
127.91  
123.31  
122.10  
119.05

89.08  
86.03  
81.97  
79.73  
77.25  
77.00  
76.74

— 40.11

Current Data Parameters  
NAME: 00\_ASCEND 500  
EXPNO: 380  
PROCNO: 1

F2 - Acquisition Parameters  
Date\_: 20210316  
Time: 10.58 h  
INSTRUM: spect  
PROBHD: 2119470\_0291 ( )  
PULPROG: zgpg30  
TD: 65536  
SOLVENT: CDCl3  
NS: 455  
DS: 4  
SWH: 29761.904 Hz  
FIDRES: 0.908261 Hz  
AQ: 1.1010048 sec  
RG: 192.83  
DW: 16.800 usec  
DE: 6.50 usec  
TE: 299.3 K  
D1: 2.00000000 sec  
D11: 0.03000000 sec  
T00: 1  
SFO1: 125.8304669 MHz  
NUC1: 13C  
P1: 10.00 usec  
PLW1: 115.01000214 W  
SFO2: 500.3710015 MHz  
NUC2: 1H  
PCPD2: waltz16  
PLW2: 23.23100090 W  
PLW3: 0.36298999 W  
PLW4: 0.18257999 W

F2 - Processing parameters  
SI: 32768  
SF: 125.8178943 MHz  
WDW: EM  
SSB: 0  
LB: 1.00 Hz  
GB: 0  
PC: 1.40

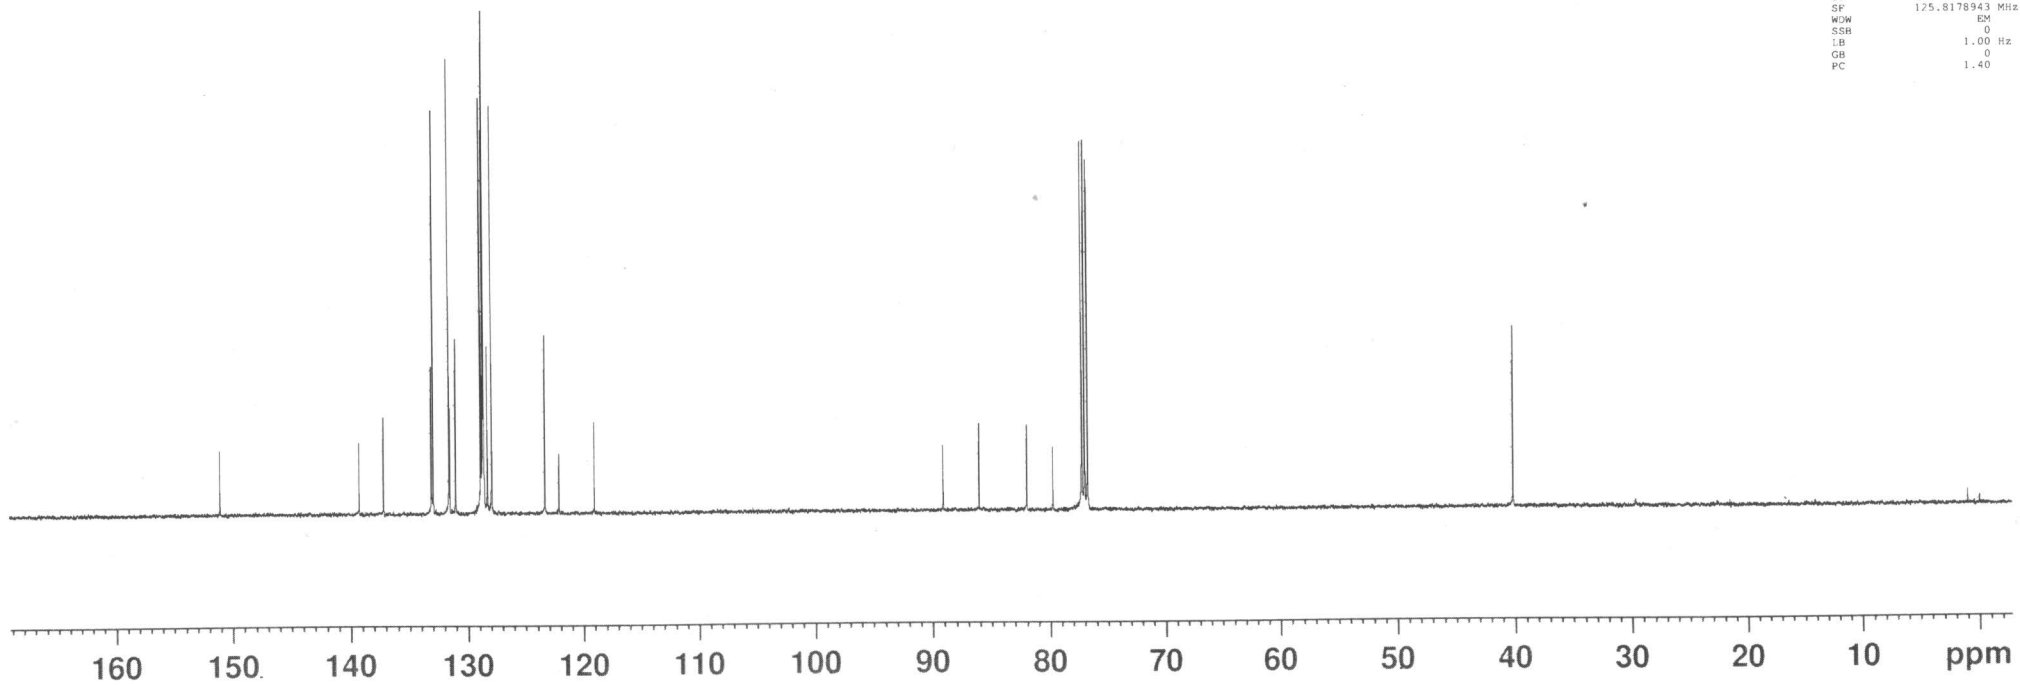

8.066  
8.051  
7.656  
7.641  
7.501  
7.499  
7.496  
7.491  
7.485  
7.472  
7.470  
7.440  
7.430  
7.427  
7.424  
7.416  
7.413  
7.410  
7.391  
7.376  
7.359  
7.344  
7.322  
7.319  
7.317  
7.309  
7.305  
7.300  
7.292  
7.290  
7.260  
7.006  
6.990  
6.926  
6.910  
6.571  
4.496

— 2.246

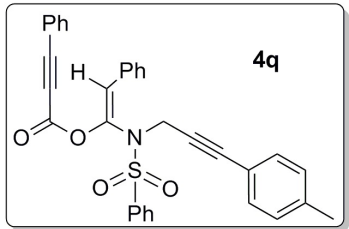

Current Data Parameters  
 NAME K SURESH UPDATED 500  
 EXPNO 115  
 PROCNO 1

F2 - Acquisition Parameters  
 Date\_ 20210722  
 Time 13.07 h  
 INSTRUM spect  
 PROBHD Z109128\_0042 ( )  
 PULPROG zg30  
 TD 65536  
 SOLVENT CDC13  
 NS 16  
 DS 2  
 SWH 10000.000 Hz  
 FIDRES 0.305176 Hz  
 AQ 3.2767999 sec  
 RG 161  
 DW 50.000 usec  
 DE 13.04 usec  
 TE 297.0 K  
 D1 1.00000000 sec  
 TD0 1  
 SFO1 500.1830886 MHz  
 NUC1 1H  
 P0 5.00 usec  
 P1 15.00 usec  
 PLW1 4.84679985 W

F2 - Processing parameters  
 S1 65536  
 SF 500.1800112 MHz  
 WDW EM  
 SSB 0  
 LB 0.30 Hz  
 GB 0  
 PC 1.00

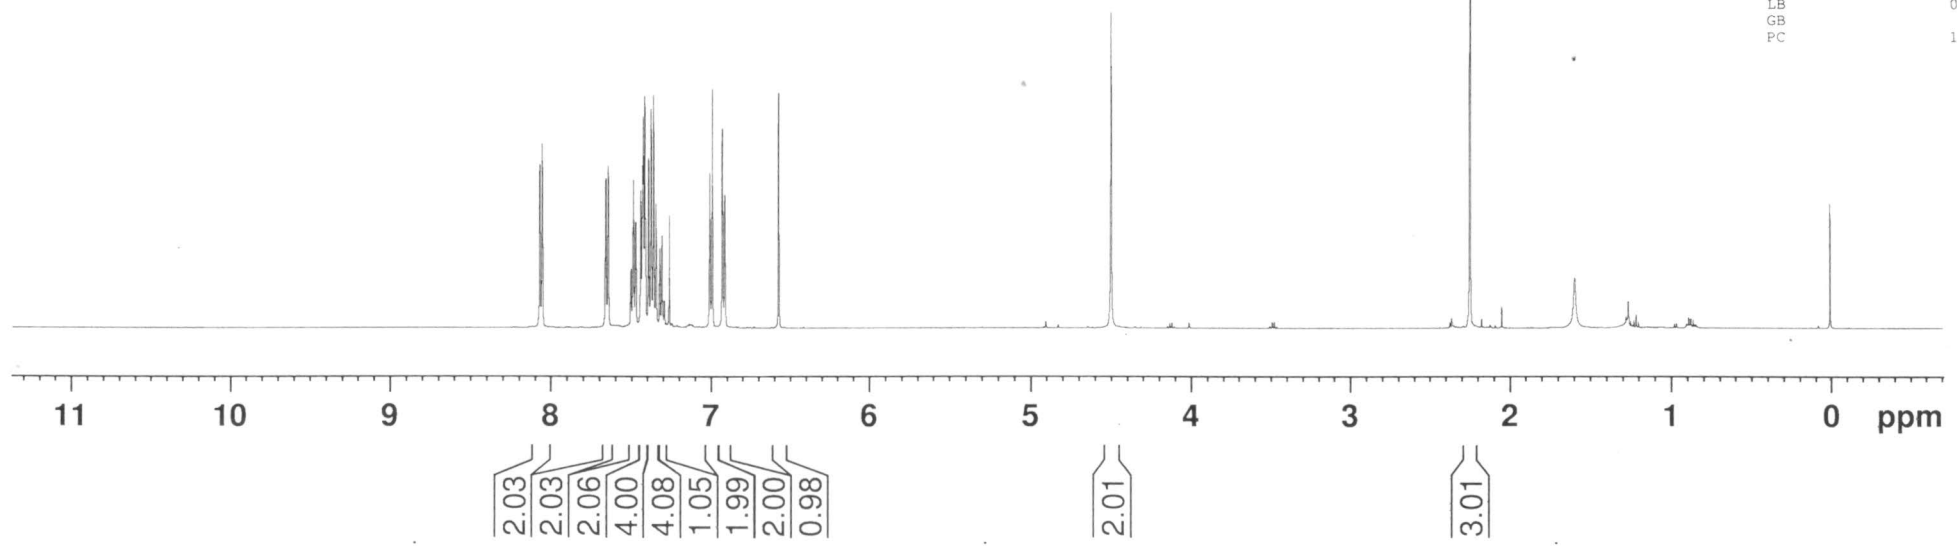



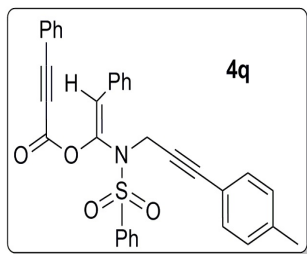

151.12  
139.27  
138.41  
137.16  
133.11  
132.98  
131.53  
130.99  
128.88  
128.79  
128.68  
128.57  
123.37  
119.09  
119.05

89.04  
86.21  
81.21  
79.76  
77.32  
77.00  
76.69

40.15

21.38

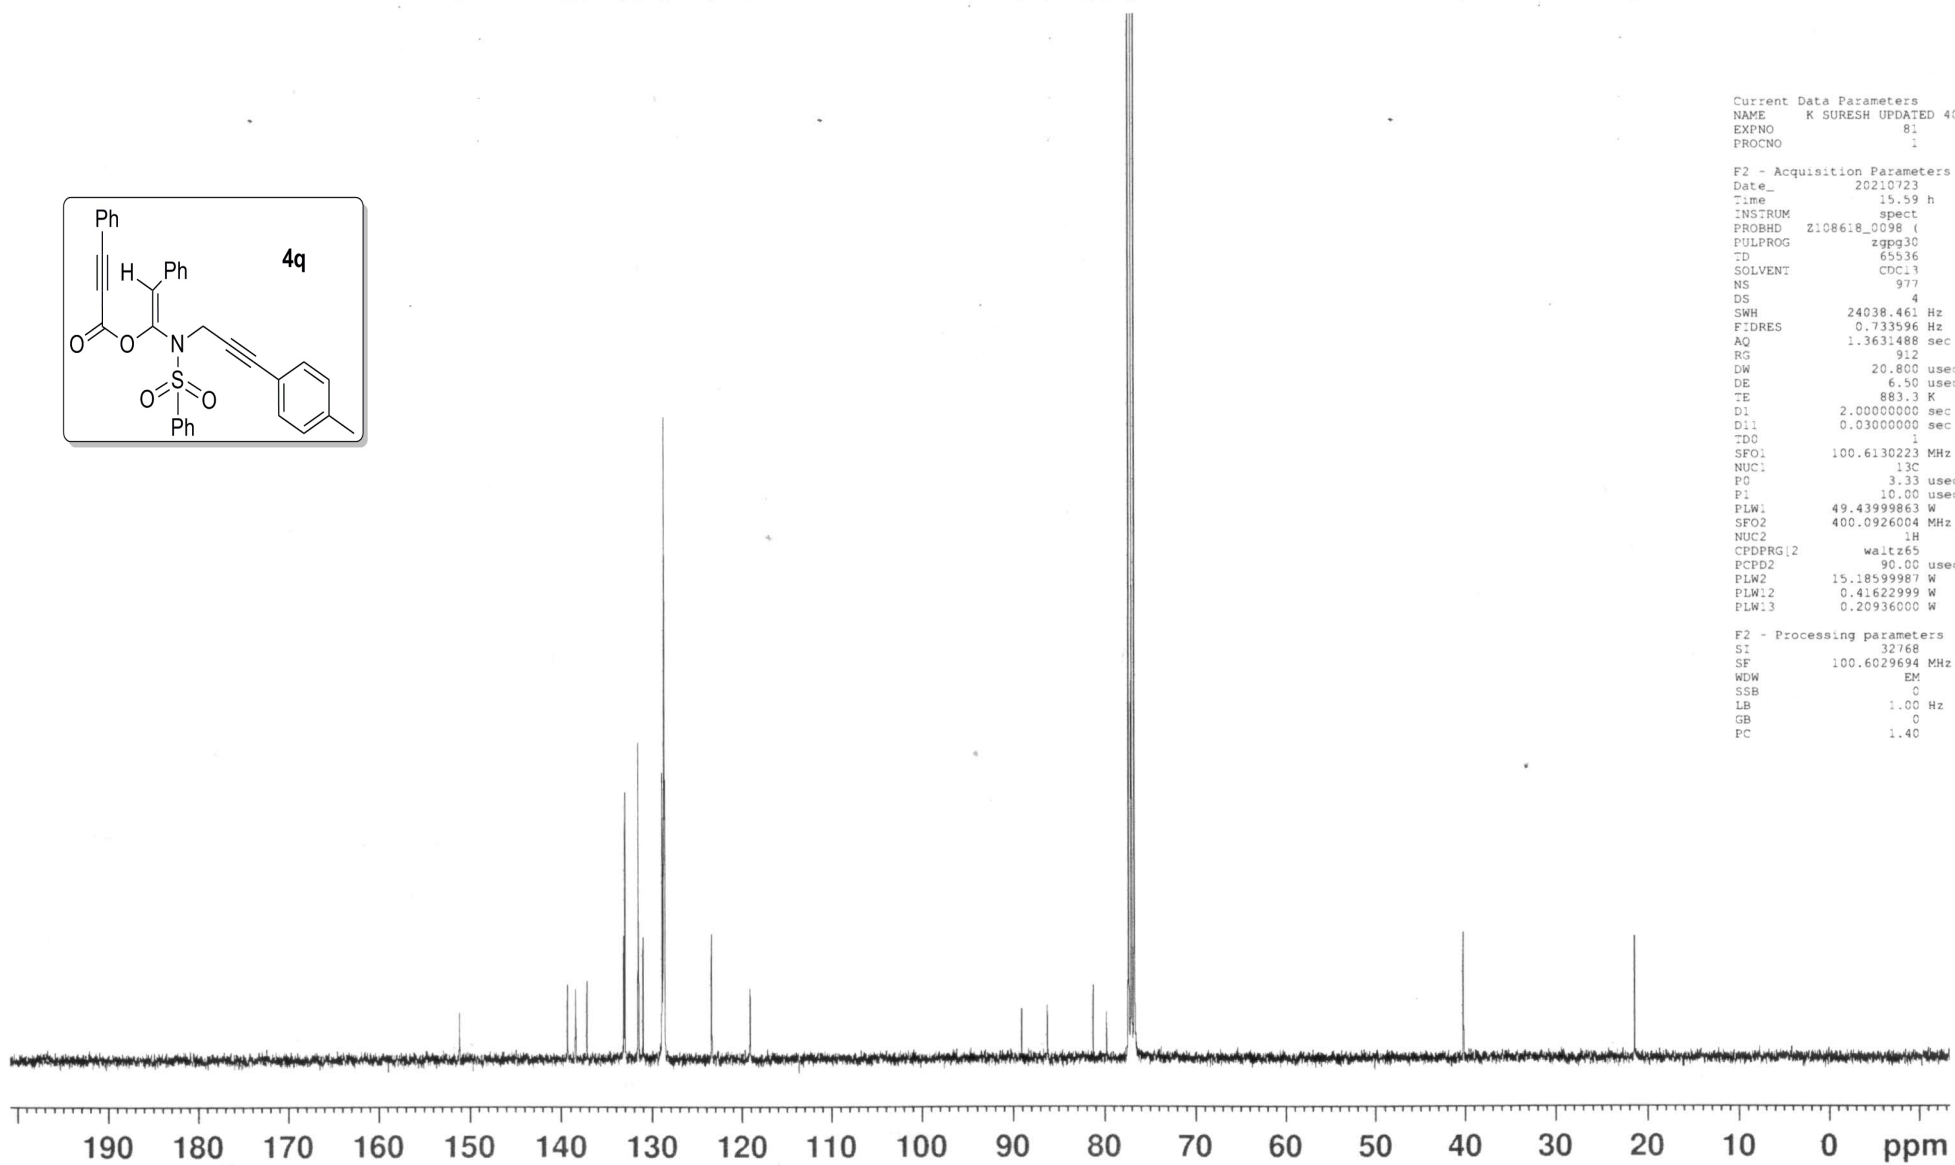

Current Data Parameters  
NAME K SURESH UPDATED 40Q  
EXPNO 81  
PROCNO 1

F2 - Acquisition Parameters  
Date\_ 20210723  
Time 15.59 h  
INSTRUM spect  
PROBHD Z108618\_0098 ( )  
PULPROG zgpg30  
TD 65536  
SOLVENT CDCl3  
NS 977  
DS 4  
SWH 24038.461 Hz  
FIDRES 0.733596 Hz  
AQ 1.3631488 sec  
RG 912  
DW 20.800 usec  
DE 6.50 usec  
TE 883.3 K  
D1 2.00000000 sec  
D11 0.03000000 sec  
TDO 1  
SFO1 100.6130223 MHz  
NUC1 13C  
PC 3.33 usec  
P1 10.00 usec  
PLW1 49.43999863 W  
SFO2 400.0926004 MHz  
NUC2 1H  
CPDPRG12 waltz165  
PCPD2 90.00 usec  
PLW2 15.18599987 W  
PLW12 0.41622999 W  
PLW13 0.20936000 W

F2 - Processing parameters  
SI 32768  
SF 100.6029694 MHz  
WDW EM  
SSB 0  
LB 1.00 Hz  
GB 0  
PC 1.40

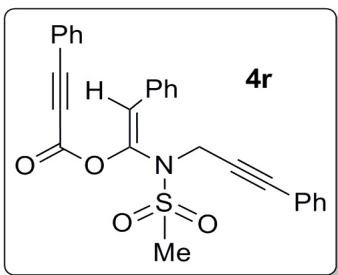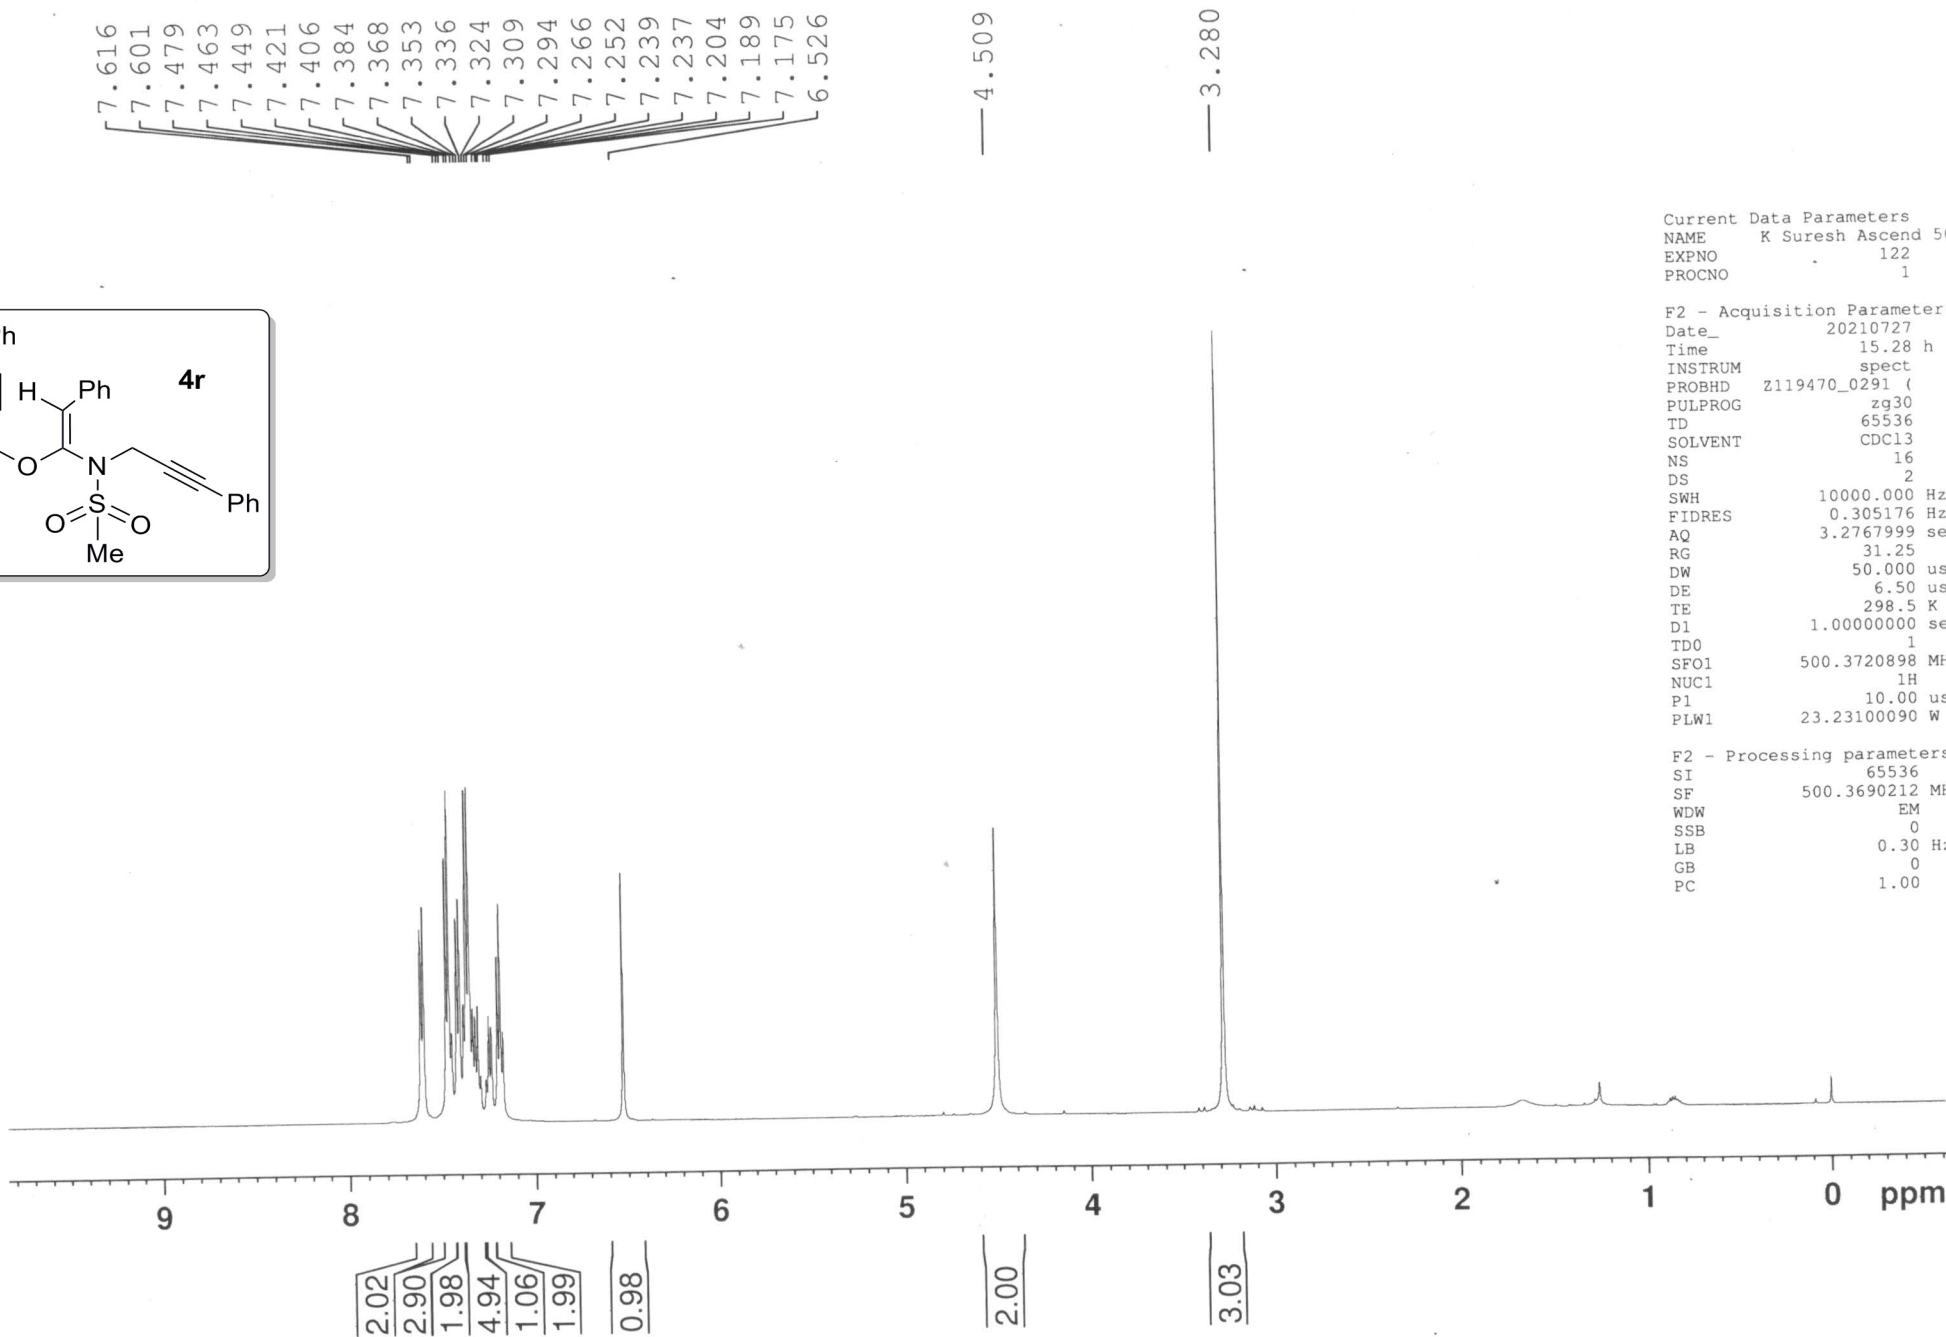

Current Data Parameters  
 NAME K Suresh Ascend 500  
 EXPNO 122  
 PROCNO 1

F2 - Acquisition Parameters  
 Date\_ 20210727  
 Time 15.28 h  
 INSTRUM spect  
 PROBHD z119470\_0291 ( )  
 PULPROG zg30  
 TD 65536  
 SOLVENT CDCl3  
 NS 16  
 DS 2  
 SWH 10000.000 Hz  
 FIDRES 0.305176 Hz  
 AQ 3.2767999 sec  
 RG 31.25  
 DW 50.000 usec  
 DE 6.50 usec  
 TE 298.5 K  
 D1 1.00000000 sec  
 TD0 1  
 SFO1 500.3720898 MHz  
 NUC1 1H  
 P1 10.00 usec  
 PLW1 23.23100090 W

F2 - Processing parameters  
 SI 65536  
 SF 500.3690212 MHz  
 WDW EM  
 SSB 0  
 LB 0.30 Hz  
 GB 0  
 PC 1.00

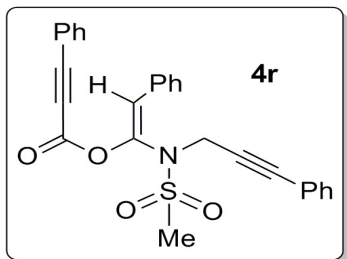

151.35  
137.40  
133.06  
131.69  
131.37  
131.16  
128.89  
128.77  
128.71  
128.58  
128.22  
122.67  
121.84  
118.77

89.81  
86.45  
82.43  
79.68  
77.26  
77.00  
76.75

42.01  
40.07

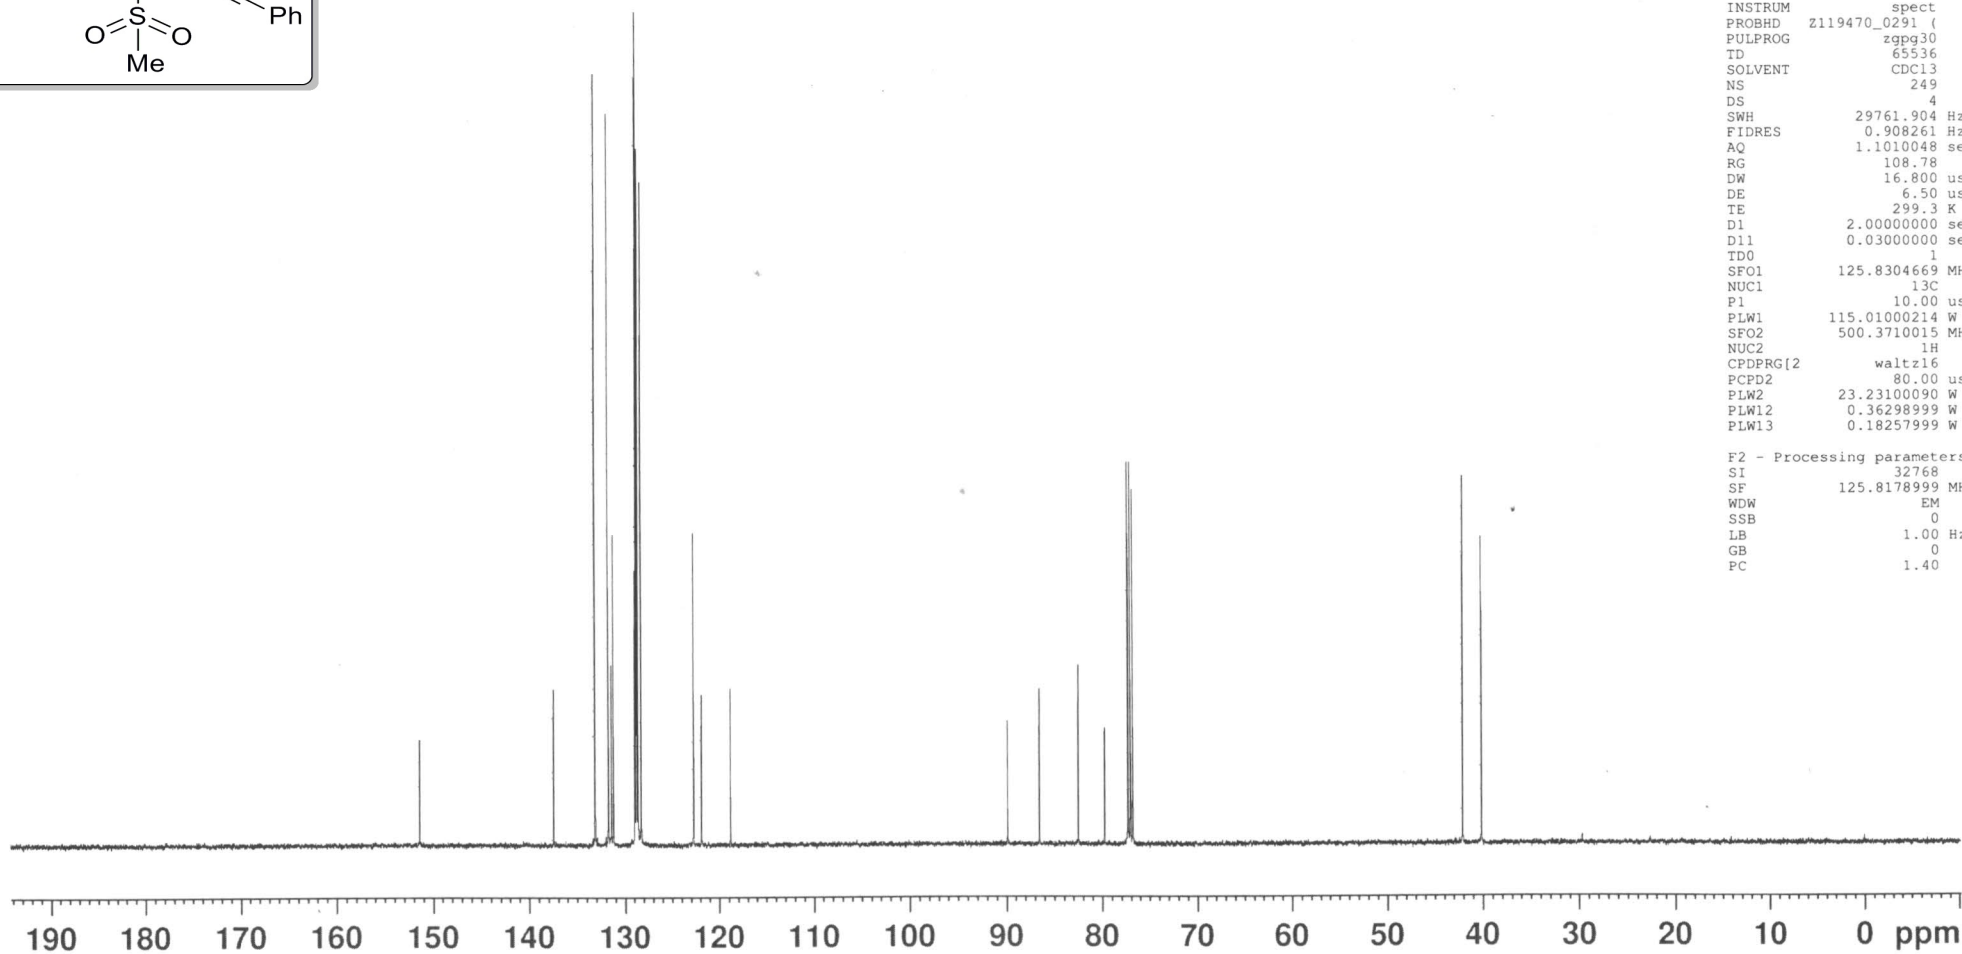

Current Data Parameters  
NAME K Suresh Ascend 500  
EXPNO 123  
PROCNO 1

F2 - Acquisition Parameters  
Date\_ 20210727  
Time 15.43 h  
INSTRUM spect  
PROBHD Z119470\_0291 (  
PULPROG zgpg30  
TD 65536  
SOLVENT CDC13  
NS 249  
DS 4  
SWH 29761.904 Hz  
FIDRES 0.908261 Hz  
AQ 1.1010048 sec  
RG 108.78  
DW 16.800 usec  
DE 6.50 usec  
TE 299.3 K  
D1 2.00000000 sec  
D11 0.03000000 sec  
TD0 1  
SFO1 125.8304669 MHz  
NUC1 13C  
P1 10.00 usec  
PLW1 115.01000214 W  
SFO2 500.3710015 MHz  
NUC2 1H  
CPDPRG[2] waltz16  
PCPD2 80.00 usec  
PLW2 23.23100090 W  
PLW12 0.36298999 W  
PLW13 0.18257999 W

F2 - Processing parameters  
SI 32768  
SF 125.8178999 MHz  
WDW EM  
SSB 0  
LB 1.00 Hz  
GB 0  
PC 1.40

7.995  
7.978  
7.635  
7.634  
7.631  
7.617  
7.508  
7.493  
7.491  
7.489  
7.482  
7.479  
7.476  
7.447  
7.444  
7.442  
7.435  
7.431  
7.428  
7.403  
7.399  
7.388  
7.384  
7.381  
7.370  
7.365  
7.361  
7.355  
7.352  
7.348  
7.343  
7.340  
7.337  
7.335  
7.328  
7.323  
7.308  
7.260  
7.216  
7.205  
7.203  
7.197  
7.194  
7.189  
7.185  
7.149  
7.147  
7.145  
7.137  
7.133  
7.131  
7.119  
7.116  
7.104  
7.100  
6.573  
4.518

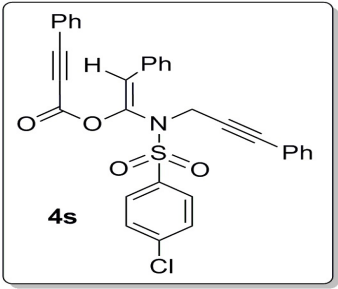

Current Data Parameters  
 NAME K Suresh Ascend 500  
 EXPNO 137  
 PROCNO 1

F2 - Acquisition Parameters  
 Date\_ 20210803  
 Time 11.20 h  
 INSTRUM spect  
 PROBHD Z119470\_0291 ( )  
 PULPROG zg30  
 TD 65536  
 SOLVENT CDCl3  
 NS 16  
 DS 2  
 SWH 10000.000 Hz  
 FIDRES 0.305176 Hz  
 AQ 3.2767999 sec  
 RG 69.79  
 DW 50.000 usec  
 DE 6.50 usec  
 TE 297.7 K  
 D1 1.00000000 sec  
 TDC 1  
 SFO1 500.3720898 MHz  
 NUC1 1H  
 P1 10.00 usec  
 PLW1 23.23100090 W

F2 - Processing parameters  
 SI 65536  
 SF 500.3690116 MHz  
 WDW EM  
 SSB 0  
 LB 0.30 Hz  
 GB 0  
 PC 1.00

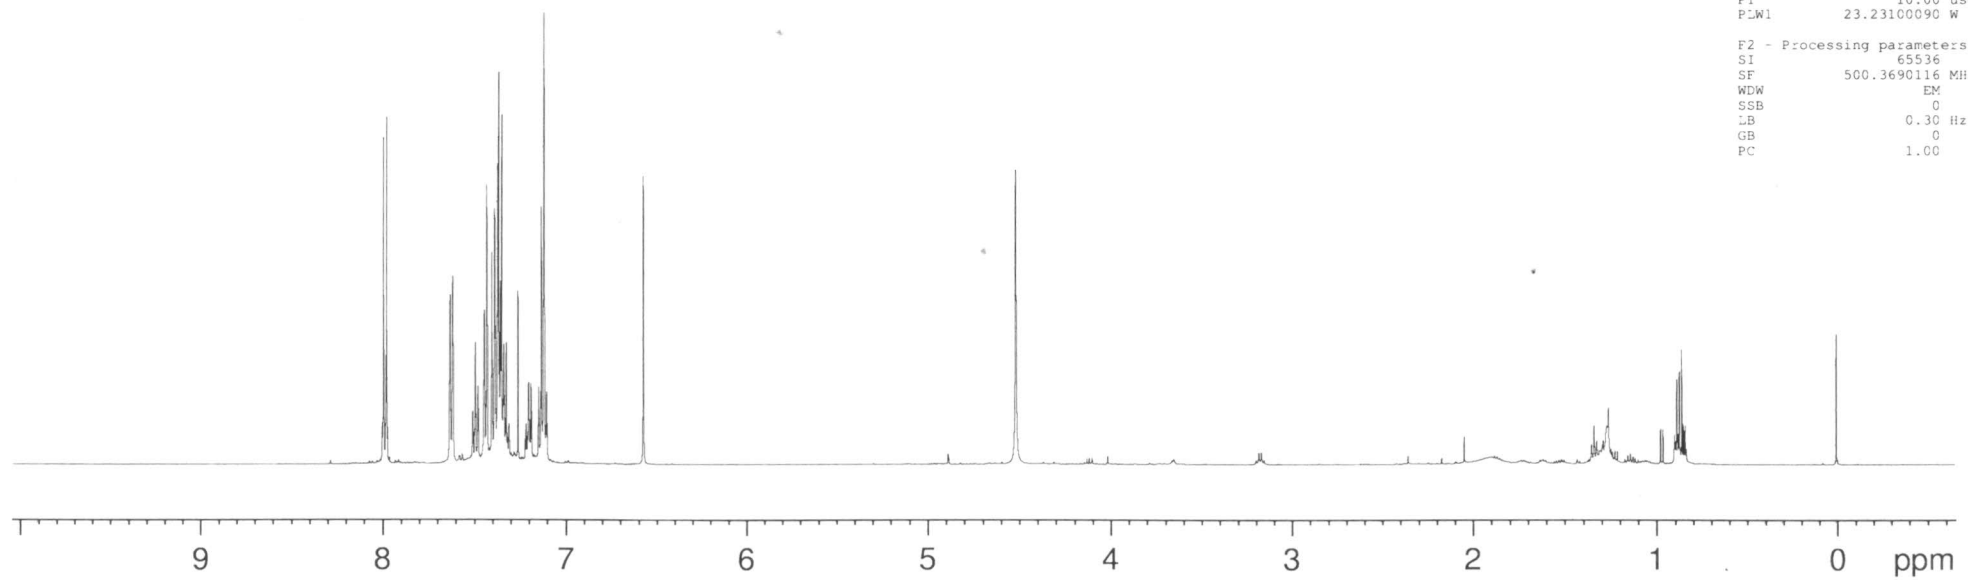

2.08  
2.02  
1.05  
2.06  
2.19  
5.08  
1.05  
3.98  
1.00

2.00

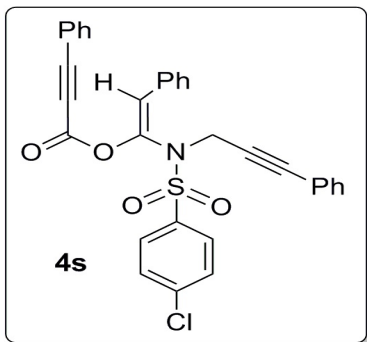

151.04  
 139.84  
 137.81  
 137.02  
 133.01  
 131.56  
 131.38  
 131.12  
 130.22  
 128.90  
 128.85  
 128.71  
 128.66  
 128.45  
 128.06  
 123.59  
 121.89  
 118.86

89.40  
 86.37  
 81.78  
 79.65  
 77.25  
 77.00  
 76.75

40.28

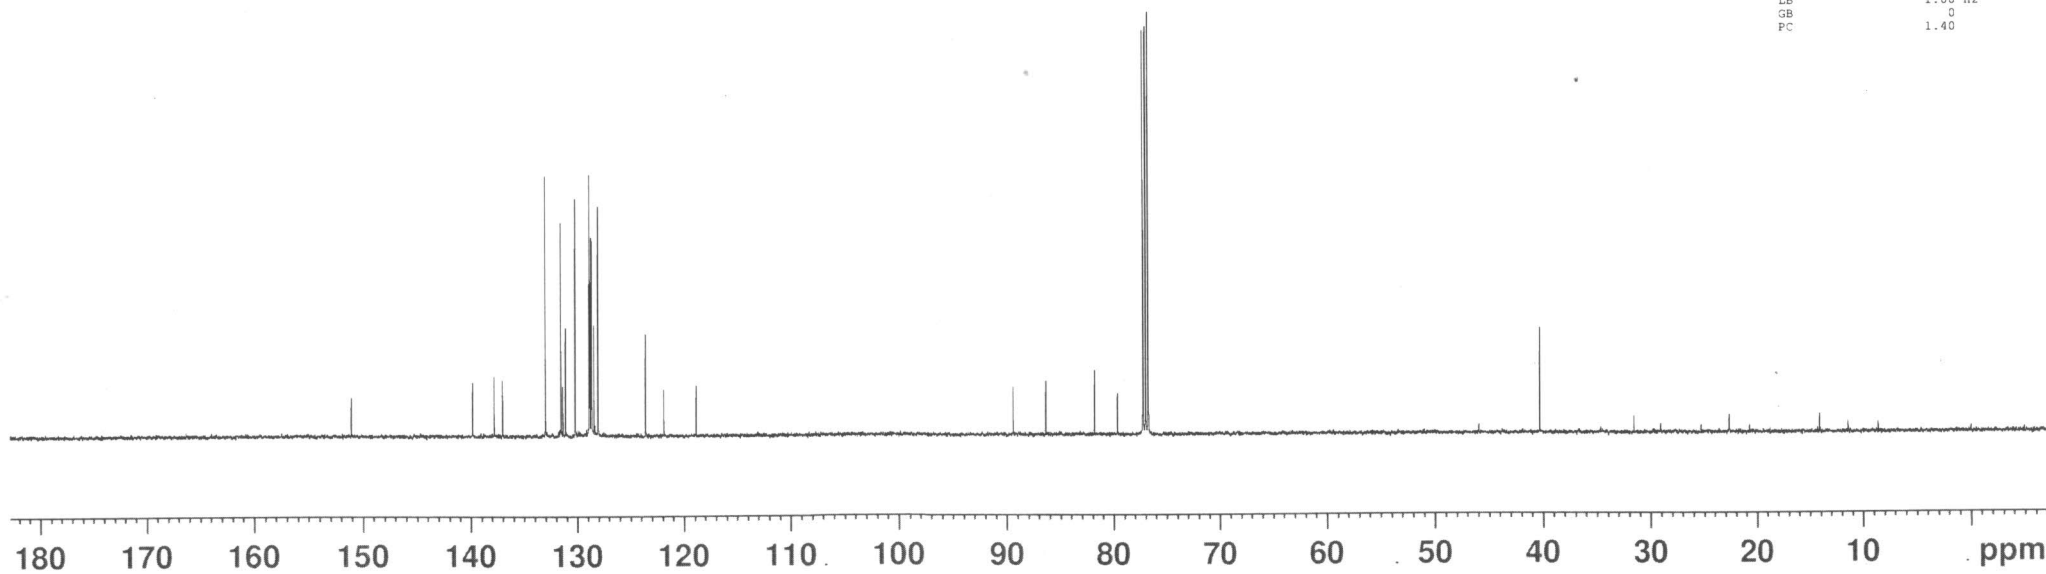

Current Data Parameters  
 NAME K Suresh Ascend 500  
 EXPNO 138  
 PROCNO 1

F2 - Acquisition Parameters  
 Date\_ 20210803  
 Time 11.41 h  
 INSTRUM spect  
 PROBHD Z119470\_0291 ( )  
 PULPROG zgpg30  
 TD 65536  
 SOLVENT CDCl3  
 NS 368  
 DS 4  
 SWH 29761.904 Hz  
 FIDRES 0.908261 Hz  
 AQ 1.1010048 sec  
 RG 87.13  
 DW 16.800 usec  
 DE 6.50 usec  
 TE 298.6 K  
 D1 2.0000000 sec  
 D11 0.0300000 sec  
 TD0 1  
 SFO1 125.8304669 MHz  
 NUC1 13C  
 P1 10.00 usec  
 PLW1 115.21000214 W  
 SFO2 500.3710015 MHz  
 NUC2 1H  
 CPDPRG12 waltz16  
 PCPD2 80.00 usec  
 PLW2 23.23100090 W  
 PLW12 0.36298999 W  
 PLW13 0.18257999 W

F2 - Processing parameters  
 SI 32768  
 SF 125.8178905 MHz  
 WDW EM  
 SSB 0  
 LB 1.00 Hz  
 GB 0  
 PC 1.40

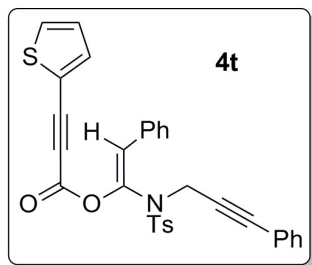

7.934  
7.924  
7.650  
7.527  
7.413  
7.365  
7.322  
7.313  
7.266  
7.227  
7.216  
7.125  
7.086  
6.556

4.477

2.265

Current Data Parameters  
NAME K SURESH UPDATED 500  
EXPNO 127  
PROCNO 1

F2 - Acquisition Parameters  
Date\_ 20210730  
Time 16.53 h  
INSTRUM spect  
PROBHD z109128\_0042 ( )  
PULPROG zg30  
TD 65536  
SOLVENT CDC13  
NS 16  
DS 2  
SWH 10000.000 Hz  
FIDRES 0.305176 Hz  
AQ 3.2767999 sec  
RG 181  
DW 50.000 usec  
DE 13.04 usec  
TE 295.9 K  
D1 1.00000000 sec  
TD0 1  
SF01 500.1830886 MHz  
NUC1 1H  
P0 5.00 usec  
P1 15.00 usec  
PLW1 4.84679985 W

F2 - Processing parameters  
SI 65536  
SF 500.1800000 MHz  
WDW EM  
SSB 0  
LB 0.30 Hz  
GB 0  
PC 1.00

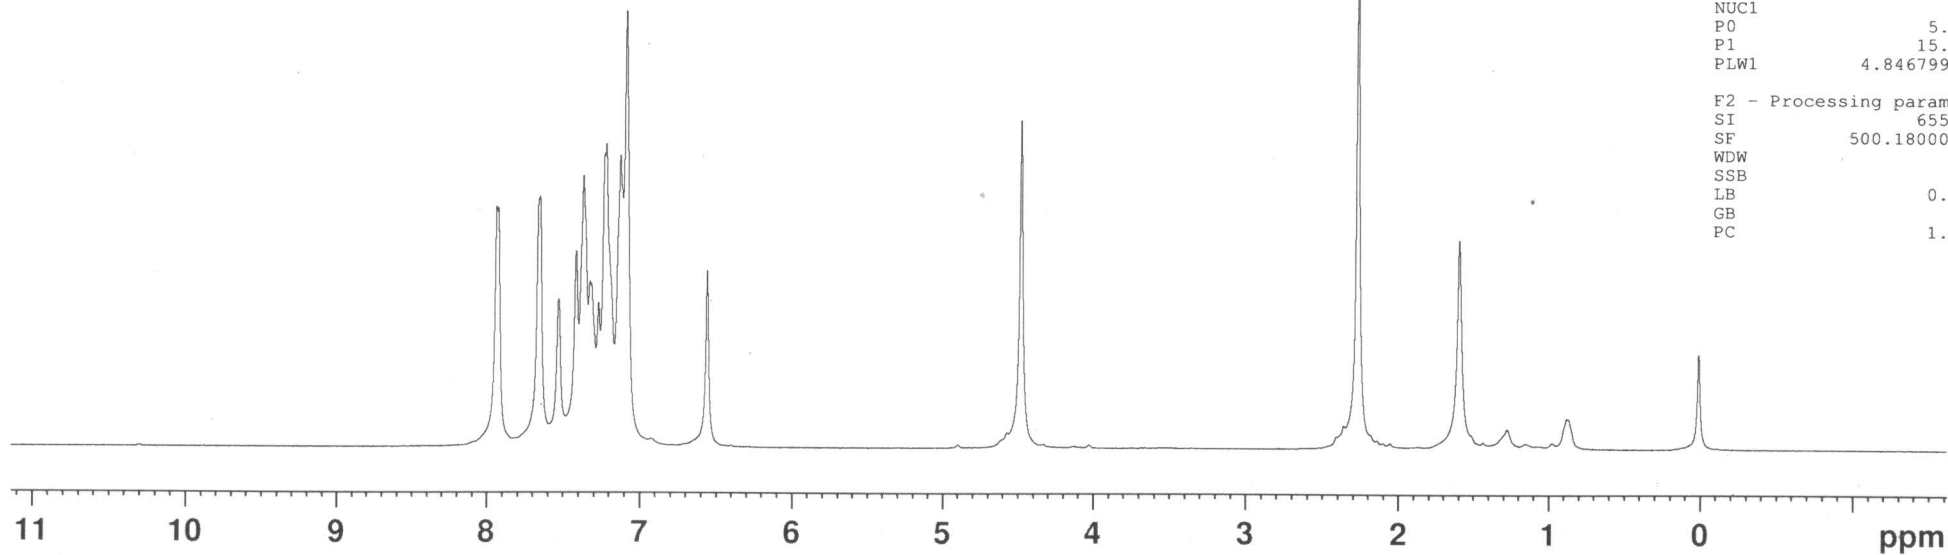

1.91  
2.00  
0.94  
12.06

0.94

1.98

3.08

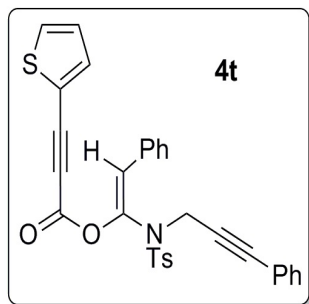

150.99  
144.14  
137.29  
137.01  
136.16  
131.79  
131.52  
129.32  
128.85  
128.63  
128.59  
128.19  
127.84  
127.66  
123.23  
122.12  
118.80

85.96  
84.16  
83.08  
82.04  
77.25  
77.00  
76.74

—39.99

—21.37

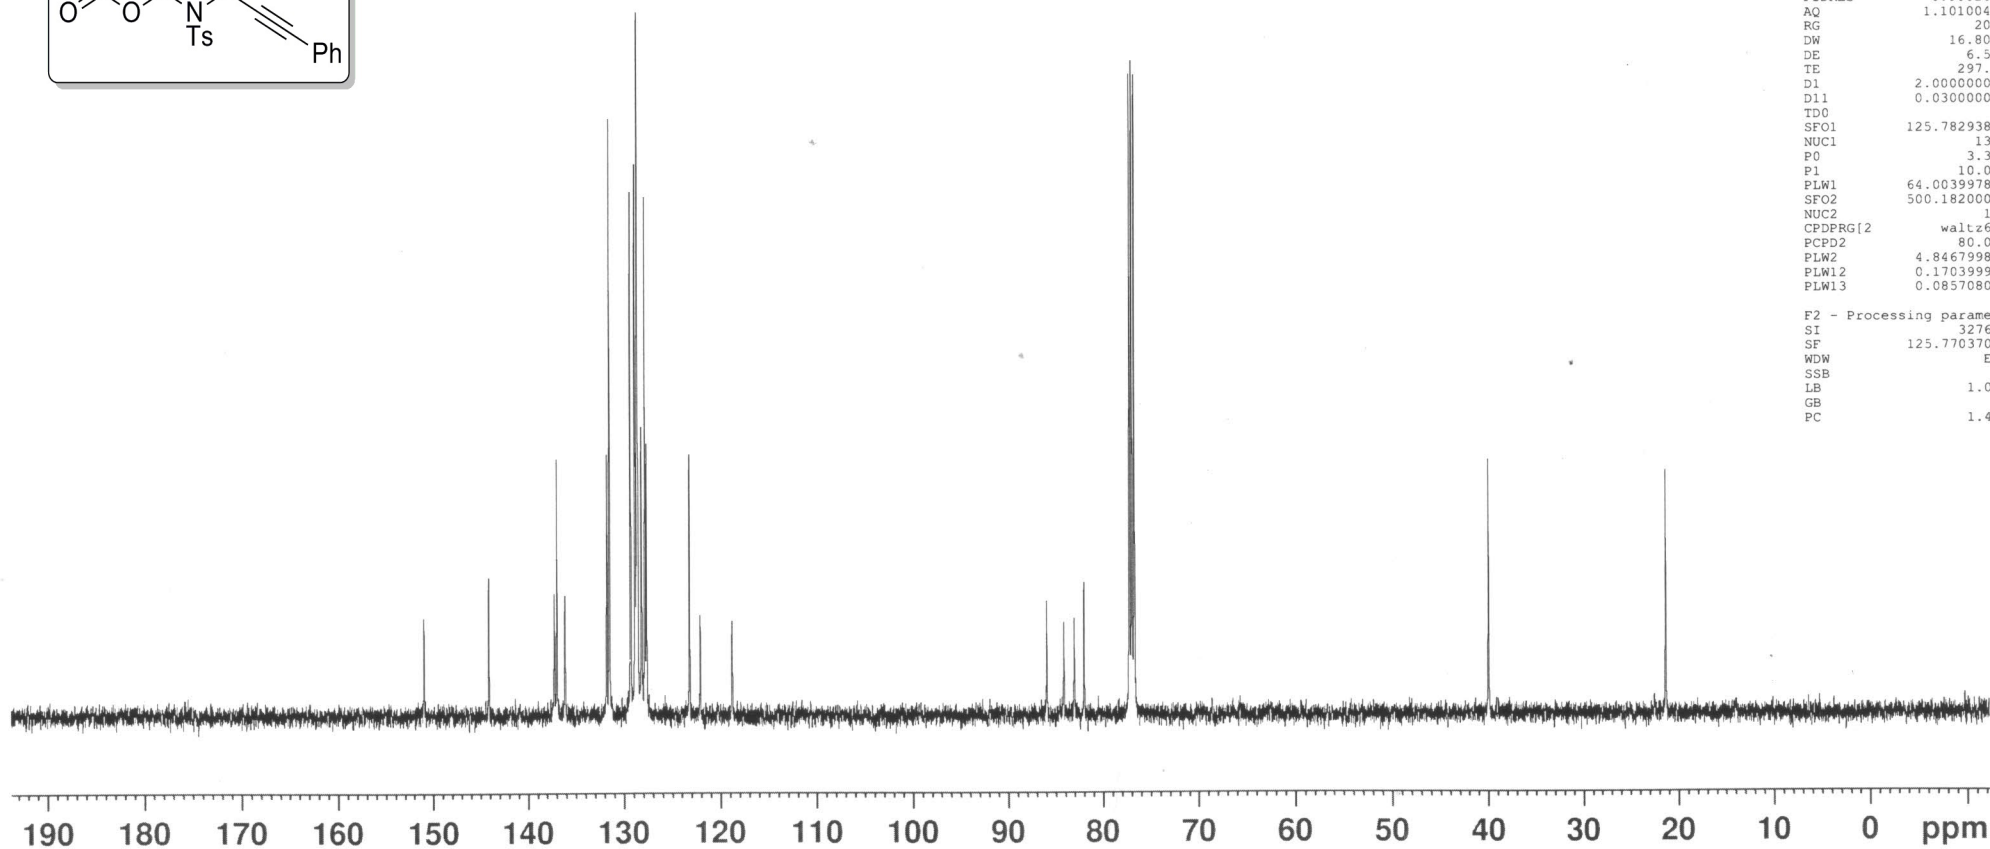

Current Data Parameters  
NAME K SURESH UPDATED 500  
EXPNO 126  
PROCNO 1

F2 - Acquisition Parameters  
Date\_ 20210730  
Time 15.06 h  
INSTRUM spect  
PROBHD Z109128\_0042 (  
PULPROG zgpg30  
TD 65536  
SOLVENT CDC13  
NS 345  
DS 4  
SWH 29761.904 Hz  
FIDRES 0.908261 Hz  
AQ 1.1010048 sec  
RG 203  
DW 16.800 usec  
DE 6.50 usec  
TE 297.3 K  
D1 2.00000000 sec  
D11 0.03000000 sec  
TD0 1  
SFO1 125.7829381 MHz  
NUC1 13C  
P0 3.33 usec  
P1 10.00 usec  
PLW1 64.00399780 W  
SFO2 500.1820007 MHz  
NUC2 1H  
CPDPRG2 waltz65  
PCPD2 80.00 usec  
PLW2 4.84679985 W  
PLW12 0.17039999 W  
PLW13 0.08570800 W

F2 - Processing parameters  
SI 32768  
SF 125.7703701 MHz  
WDW EM  
SSB 0  
LB 1.00 Hz  
GB 0  
PC 1.40

RP-17-116

—7.797  
—7.533  
—7.295

—6.473

—5.590

—3.895

—3.035

—2.414

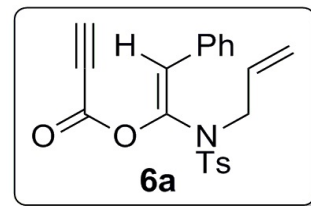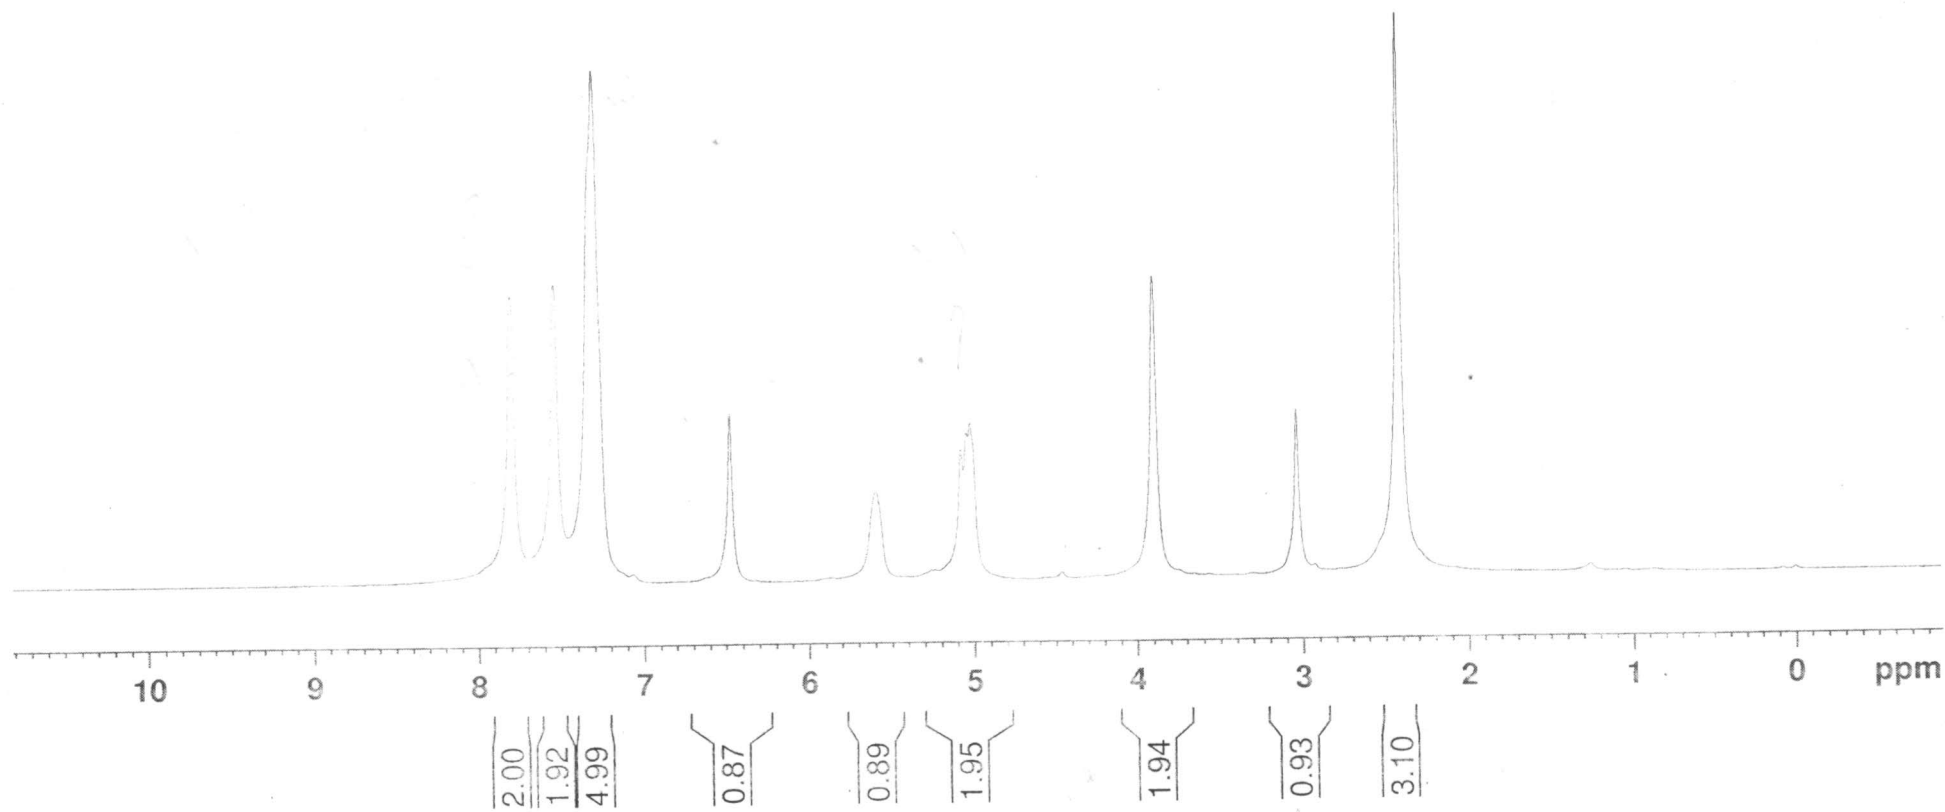



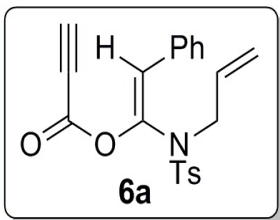

149.88  
 144.23  
 137.03  
 136.10  
 131.54  
 131.30  
 129.63  
 128.88  
 128.69  
 128.53  
 128.16  
 122.75  
 120.03

77.31  
 77.25  
 77.06  
 76.80  
 73.78

— 52.18

— 21.56

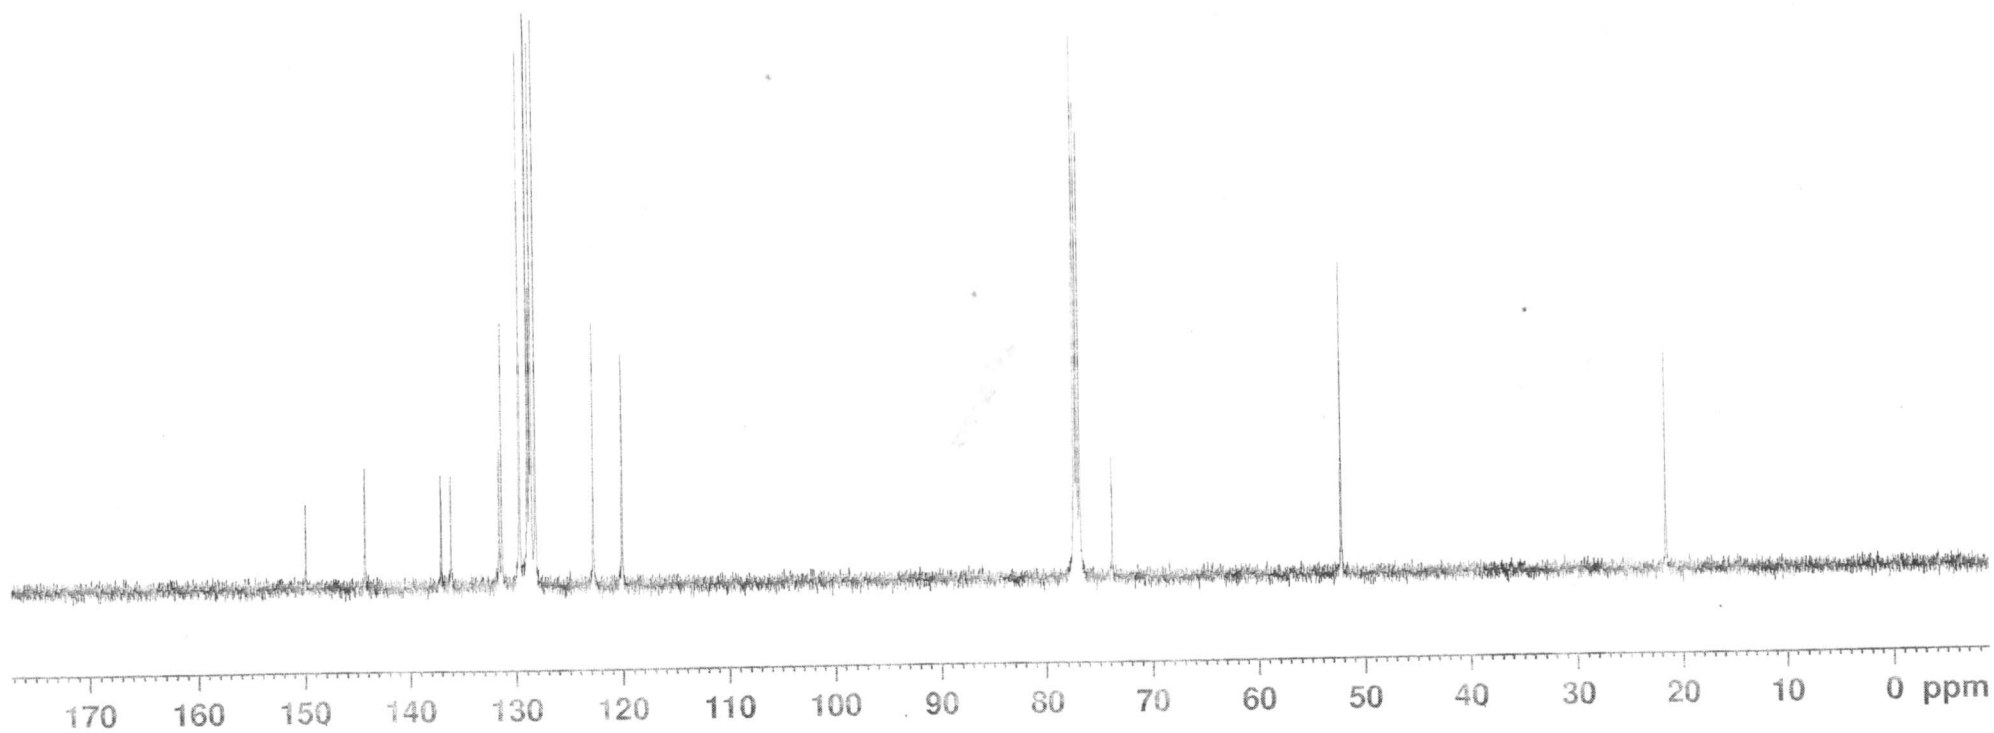

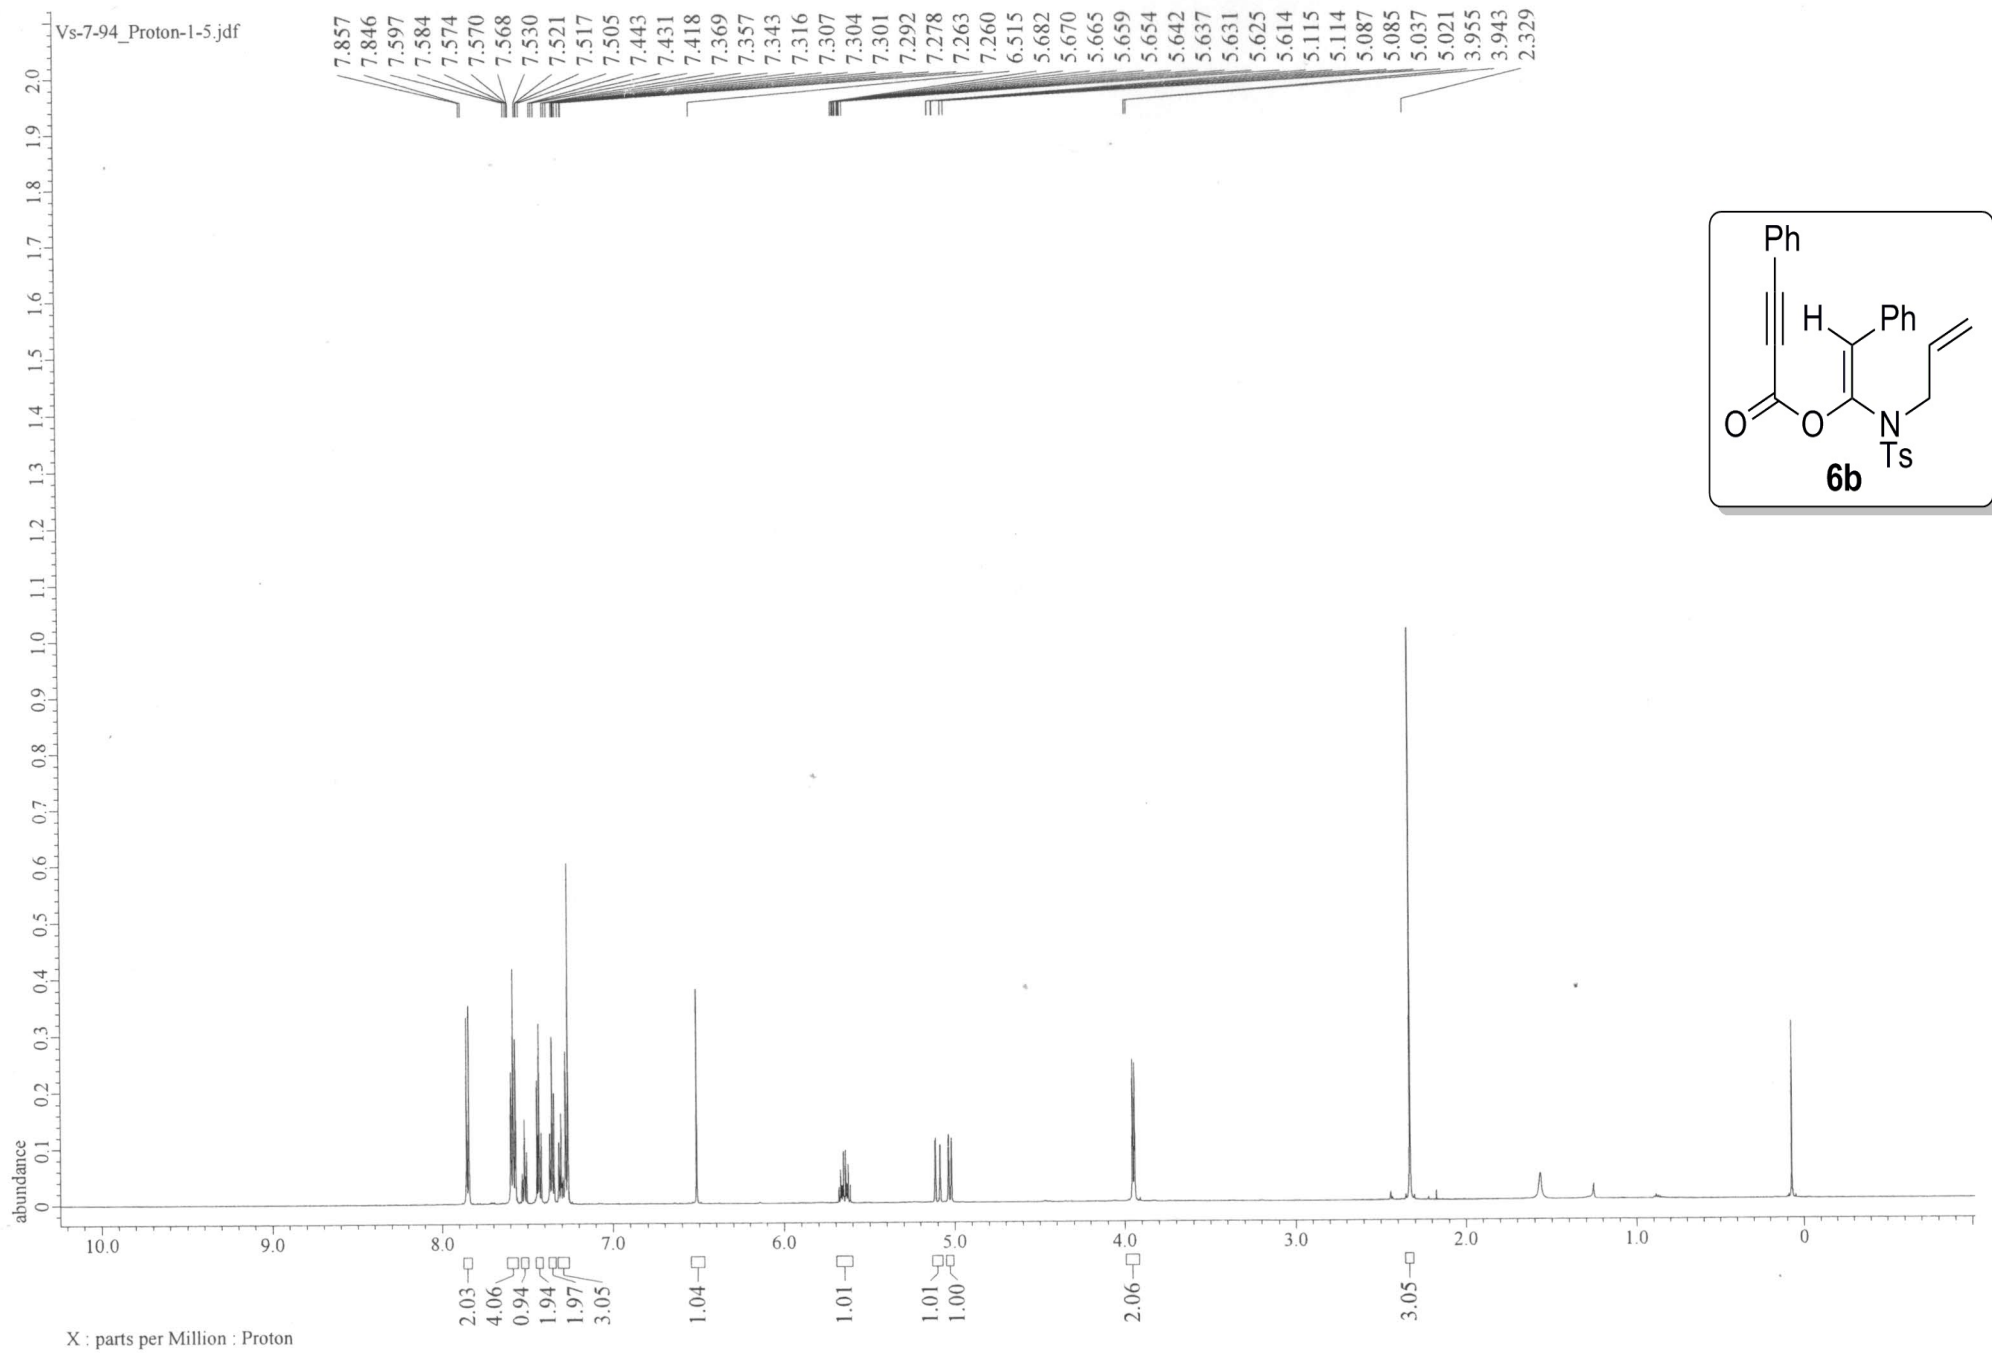

vs-78-94\_Carbon-1-3.jdf

151.147  
143.975  
137.340  
136.268  
133.099  
131.729  
131.490  
131.174  
129.632  
129.556  
129.470  
129.403  
128.914  
128.847  
128.713  
128.503  
128.235  
122.327  
119.072  
88.988  
79.700  
77.211  
77.000  
76.780  
52.383

21.486

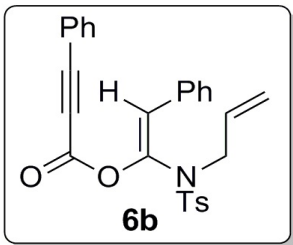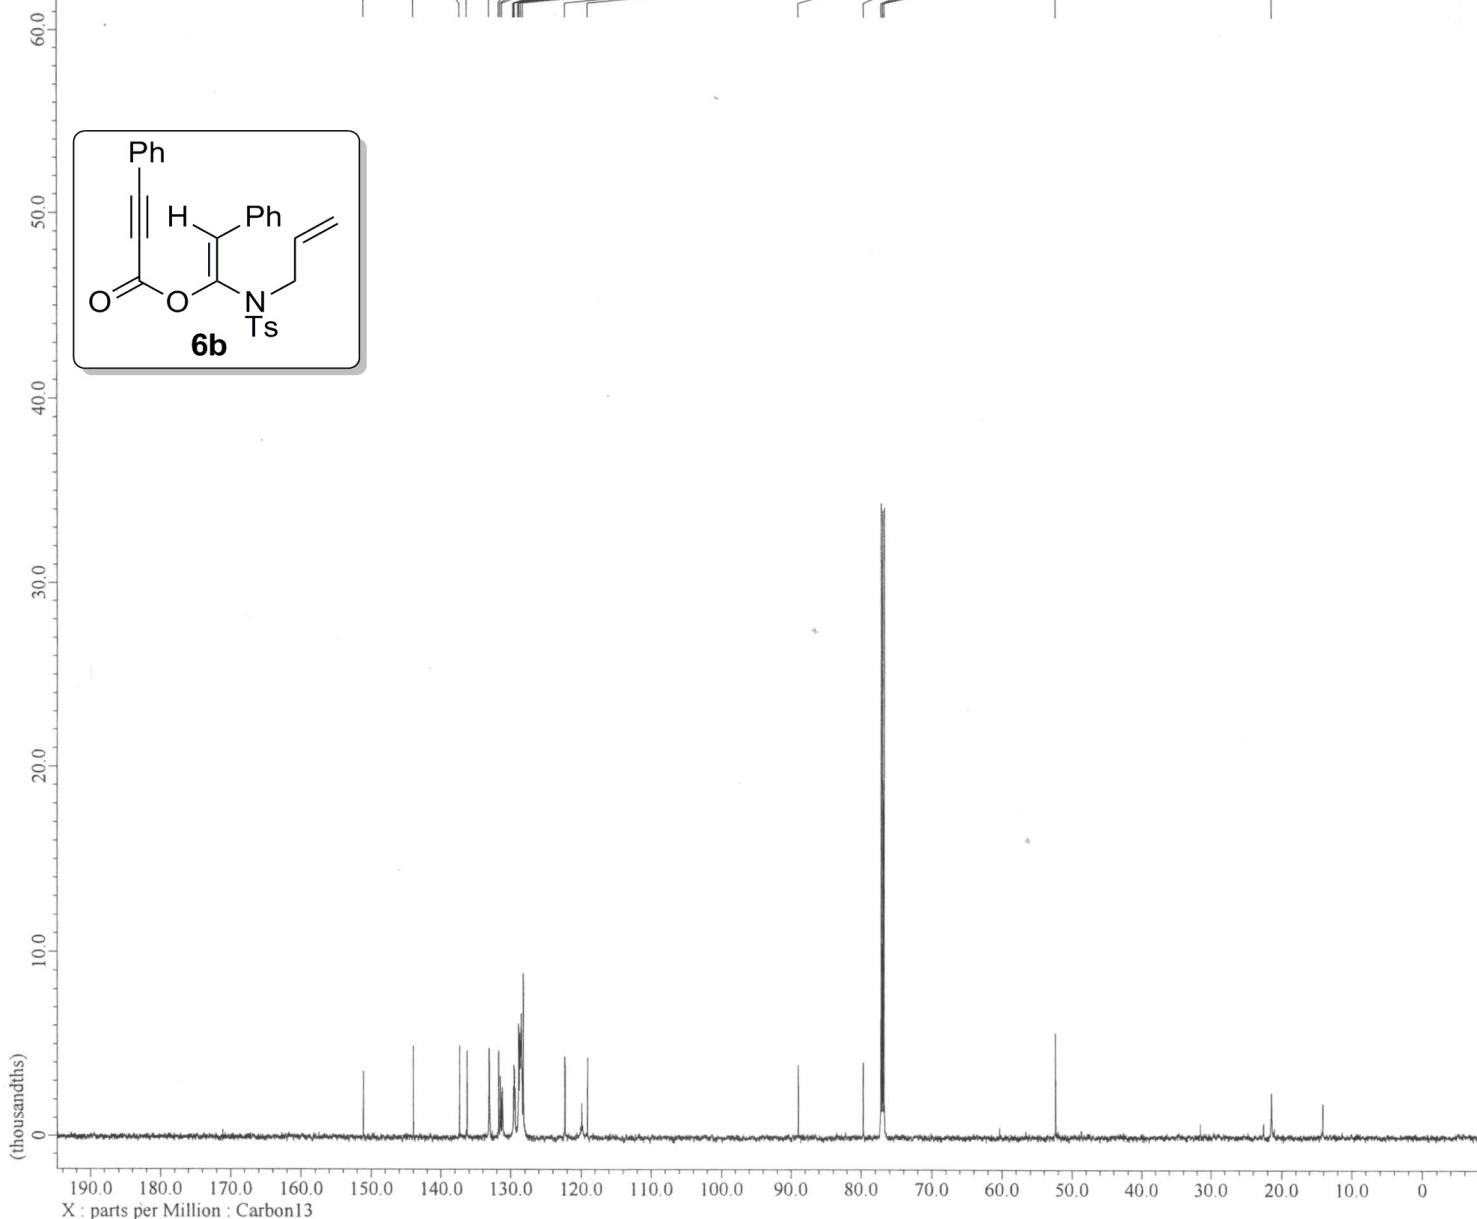

|                          |                       |
|--------------------------|-----------------------|
| Filename                 | = vs-78-94_Carbon-1-  |
| Author                   | = delta               |
| Experiment               | = carbon_auto.jxp     |
| Sample_Id                | = vs-78-94            |
| Solvent                  | = CHLOROFORM-D        |
| Actual_Start_Time        | = 11-FEB-2021 17:03:  |
| Revision_Time            | = 17-FEB-2021 01:17:  |
| Comment                  | = single pulse decou  |
| Data_Format              | = 1D COMPLEX          |
| Dim_Size                 | = 26214               |
| X_Domain                 | = Carbon13            |
| Dim_Title                | = Carbon13            |
| Dim_Units                | = [ppm]               |
| Dimensions               | = X                   |
| Site                     | = ACRHEM UOH          |
| Spectrometer             | = JNM-ECZ600R/M1      |
| Field_Strength           | = 14.09636928 [T] (60 |
| X_Acq_Duration           | = 0.34603008 [s]      |
| X_Domain                 | = Carbon13            |
| X_Freq                   | = 150.91343039 [MHz]  |
| X_Offset                 | = 100 [ppm]           |
| X_Points                 | = 16384               |
| X_Prescans               | = 4                   |
| X_Resolution             | = 2.88992217 [Hz]     |
| X_Sweep                  | = 47.34848485 [kHz]   |
| X_Sweep_Clippped         | = 37.87878788 [kHz]   |
| Irr_Domain               | = Proton              |
| Irr_Freq                 | = 600.1723046 [MHz]   |
| Irr_Offset               | = 5 [ppm]             |
| Blanking                 | = 2 [us]              |
| Clipped                  | = FALSE               |
| Scans                    | = 562                 |
| Total_Scans              | = 562                 |
| Relaxation_Delay         | = 2 [s]               |
| Recvr_Gain               | = 56                  |
| Temp_Get                 | = 19.5 [dC]           |
| X_90_Width               | = 11 [us]             |
| X_Acq_Time               | = 0.34603008 [s]      |
| X_Angle                  | = 30 [deg]            |
| X_Atn                    | = 10.3 [dB]           |
| X_Pulse                  | = 3.66666667 [us]     |
| Irr_Atn_Dec              | = 33.452 [dB]         |
| Irr_Atn_Dec_Calc         | = 33.452 [dB]         |
| Irr_Atn_Dec_Default_Calc | = 33.452 [dB]         |
| Irr_Atn_Noie             | = 33.452 [dB]         |
| Irr_Dec_Bandwidth_Hz     | = 7.23684211 [kHz]    |
| Irr_Dec_Bandwidth_Ppm    | = 12.05794078 [ppm]   |
| Irr_Dec_Freq             | = 600.1723046 [MHz]   |
| Irr_Dec_Merit_Factor     | = 2.2                 |
| Irr_Decoupling           | = TRUE                |
| Irr_Noie                 | = TRUE                |
| Irr_Noise                | = WALTZ               |
| Irr_Offset_Default       | = 5 [ppm]             |
| Irr_Pwidth               | = 76 [us]             |
| Irr_Pwidth_Default       | = 76 [us]             |
| Irr_Pwidth_Default_Calc  | = 76 [us]             |
| Irr_Pwidth_Templ         | = 76 [us]             |
| Irr_Wurst                | = FALSE               |
| Decimation_Rate          | = 0                   |
| Experiment_Path          | = c:\Program Files\J  |
| Initial_Wait             | = 1 [s]               |
| Noe_Time                 | = 2 [s]               |
| Noe_Time_Flag            | = FALSE               |
| Relaxation_Delay_Calc    | = 0 [s]               |
| Relaxation_Delay_Temp    | = 2 [s]               |

7.845  
7.828  
7.604  
7.589  
7.571  
7.561  
7.557  
7.555  
7.525  
7.522  
7.519  
7.511  
7.507  
7.503  
7.495  
7.492  
7.489  
7.436  
7.421  
7.409  
7.406  
7.357  
7.354  
7.343  
7.328  
7.299  
7.296  
7.288  
7.284  
7.280  
7.267  
7.260  
7.250  
6.513  
5.034  
5.031  
5.029  
5.019  
5.016  
5.014  
5.004  
5.002  
4.999  
3.960  
3.945  
2.322  
1.497  
1.488

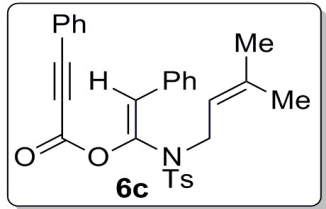

Current Data Parameters  
 NAME Rangu Prasad  
 EXPNO 38  
 PROCNO 1

F2 - Acquisition Parameters  
 Date\_ 20210729  
 Time 17.08 h  
 INSTRUM spect  
 PROBHD Z109128\_0042 ( )  
 PULPROG zg30  
 TD 65536  
 SOLVENT CDC13  
 NS 16  
 DS 2  
 SWH 10000.000 Hz  
 FIDRES 0.305176 Hz  
 AQ 3.2767999 sec  
 RG 101  
 DW 50.000 use  
 DE 13.04 use  
 TE 297.7 K  
 D1 1.00000000 sec  
 TD0 1  
 SFO1 500.1830886 MHz  
 NUC1 1H  
 P0 5.00 use  
 P1 15.00 use  
 PLW1 4.84679985 W

F2 - Processing parameters  
 SI 65536  
 SF 500.1800108 MHz  
 WDW EM  
 SSB 0  
 LB 0.30 Hz  
 GB 0  
 PC 1.00

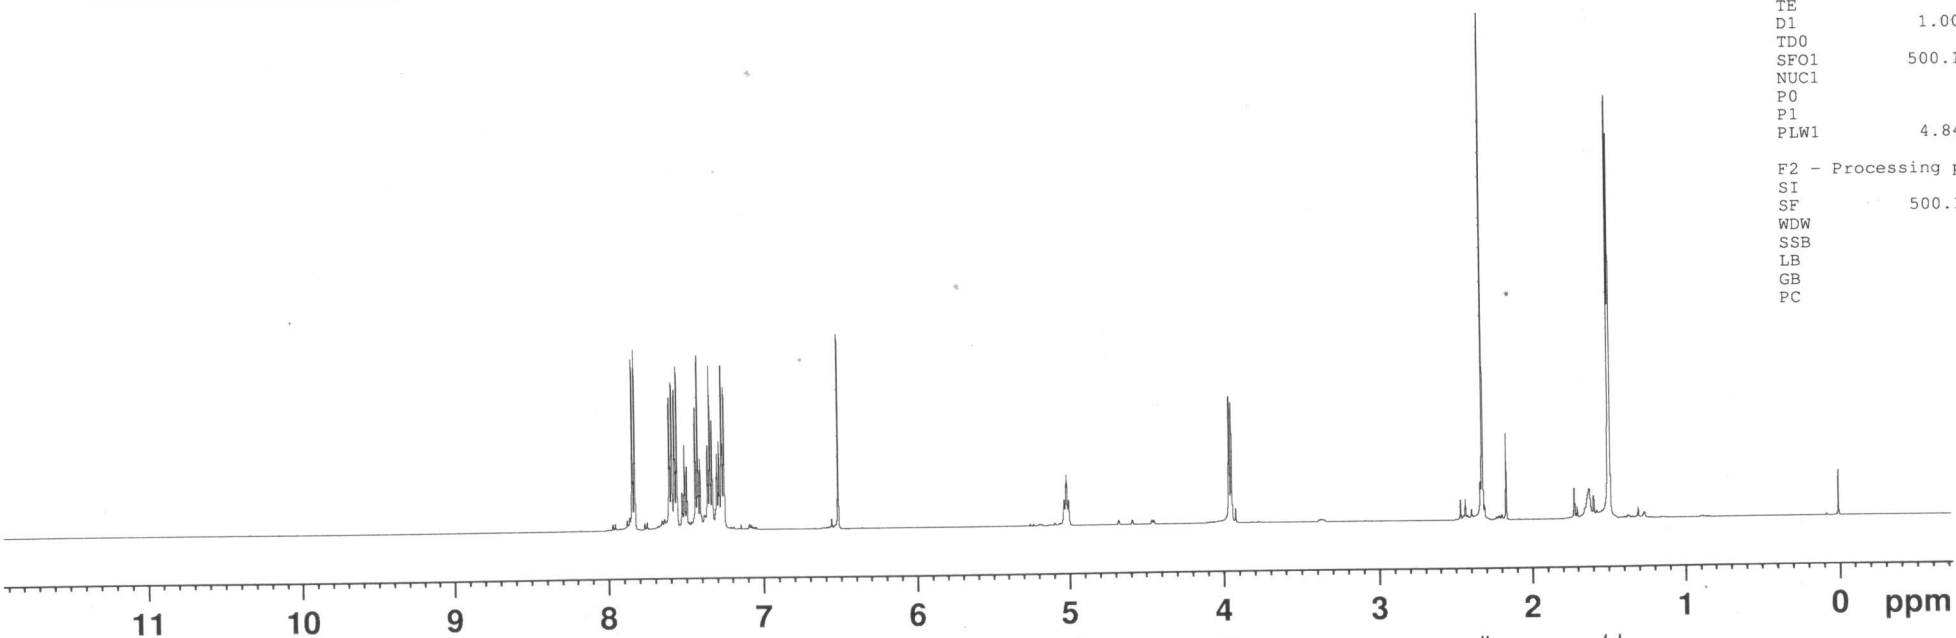

1.93  
4.17  
1.10  
2.14  
2.05  
3.20  
0.95  
0.99  
2.03  
3.00  
6.01

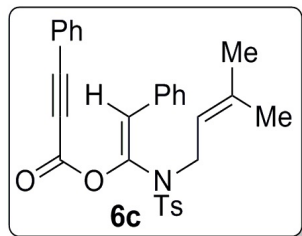

151.16  
143.75  
138.39  
137.64  
136.49  
133.05  
132.06  
131.11  
129.40  
128.86  
128.70  
128.36  
128.20  
122.46  
119.16  
117.48

— 88.86  
79.76  
77.32  
77.00  
76.68

— 47.24

— 25.58  
— 21.45  
— 17.66

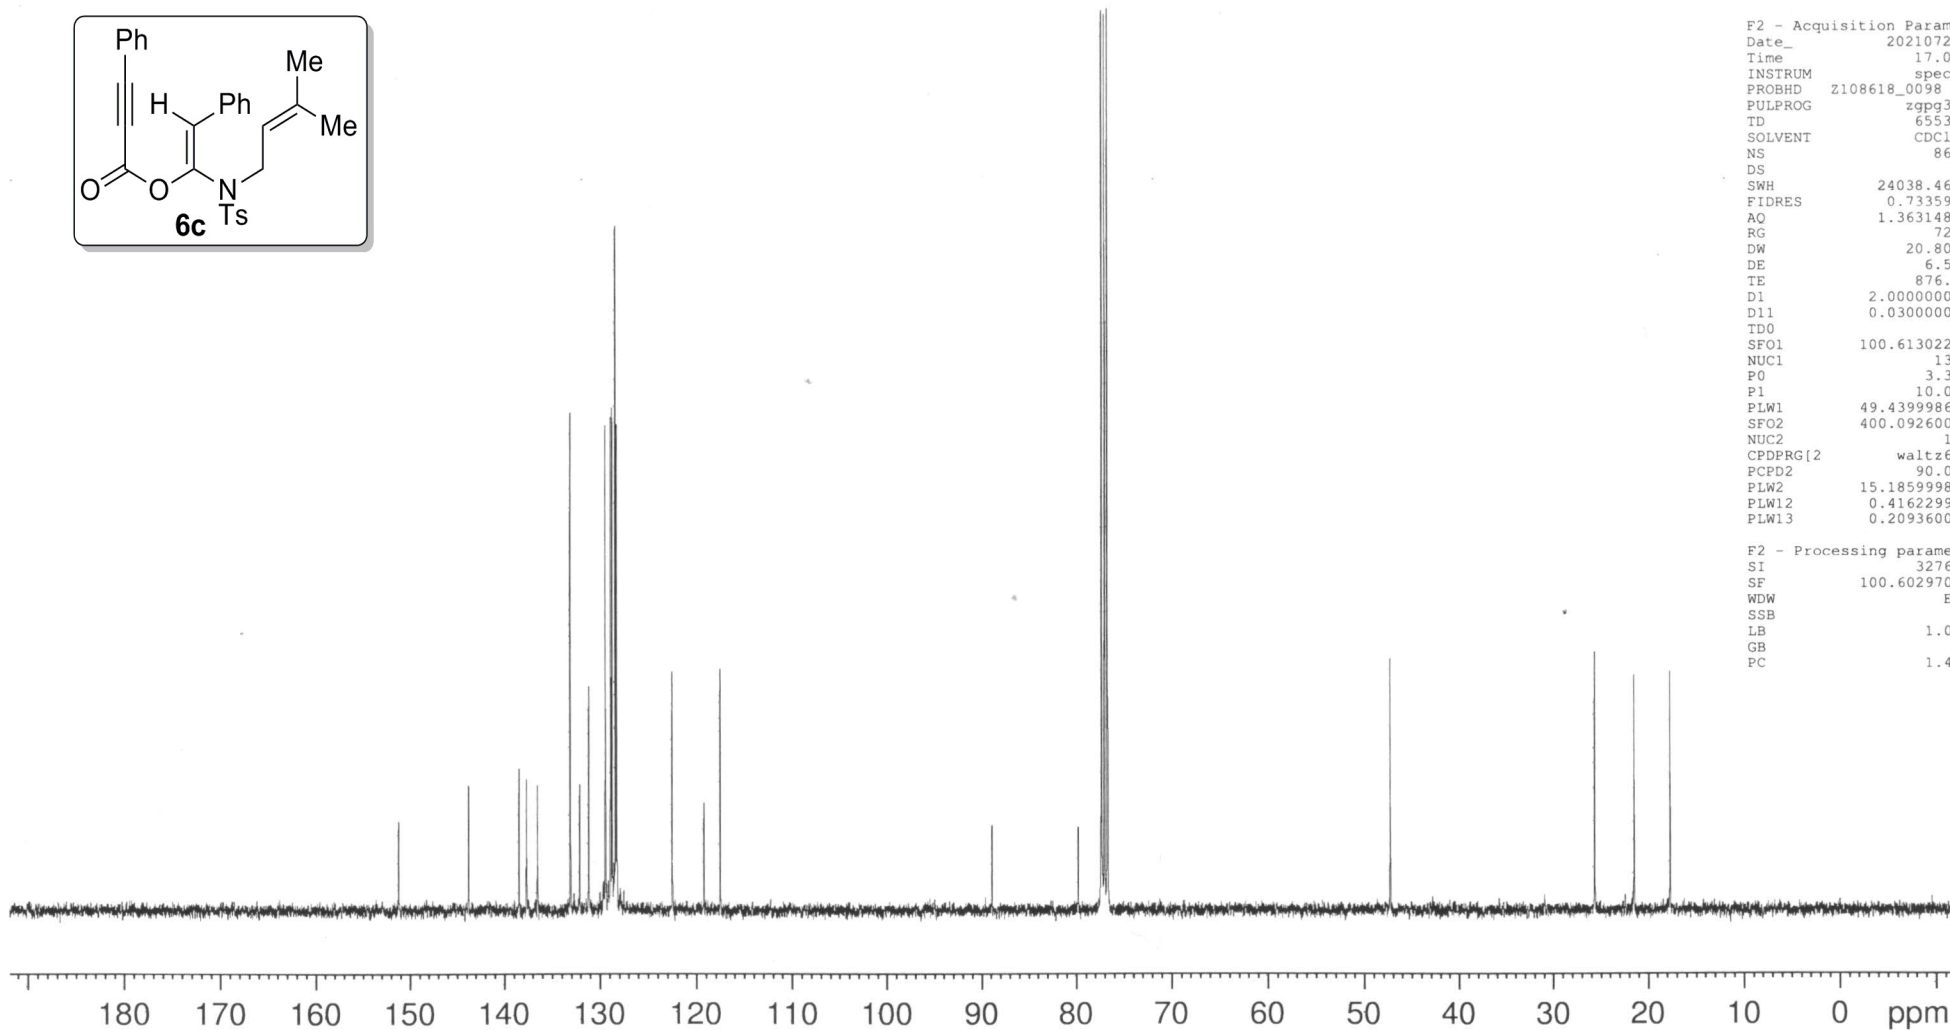

Current Data Parameters  
NAME Rangu Prasad  
EXPNO 39  
PROCNO 1

F2 - Acquisition Parameters  
Date\_ 20210729  
Time 17.00 h  
INSTRUM spect  
PROBHD Z108618\_0098 (  
PULPROG zgpg30  
TD 65536  
SOLVENT CDC13  
NS 868  
DS 4  
SWH 24038.461 Hz  
FIDRES 0.733596 Hz  
AQ 1.3631488 sec  
RG 724  
DW 20.800 usec  
DE 6.50 usec  
TE 876.9 K  
D1 2.0000000 sec  
D11 0.0300000 sec  
TD0 1  
SFO1 100.6130223 MHz  
NUC1 13C  
P0 3.33 usec  
P1 10.00 usec  
PLW1 49.43999863 W  
SFO2 400.0926004 MHz  
NUC2 1H  
CPDPRG[2] waltz65  
PCPD2 90.00 usec  
PLW2 15.18599987 W  
PLW12 0.41622999 W  
PLW13 0.20936000 W

F2 - Processing parameters  
SI 32768  
SF 100.6029701 MHz  
WDW EM  
SSB 0  
LB 1.00 Hz  
GB 0  
PC 1.40

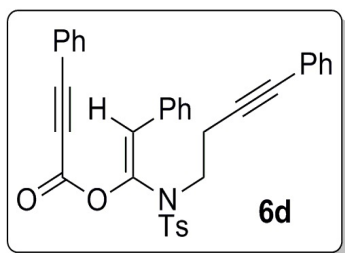

7.930  
7.916  
7.684  
7.678  
7.599  
7.584  
7.550  
7.535  
7.521  
7.462  
7.447  
7.432  
7.368  
7.352  
7.339  
7.329  
7.290  
7.271  
6.619

— 3.588  
— 2.647  
— 2.315

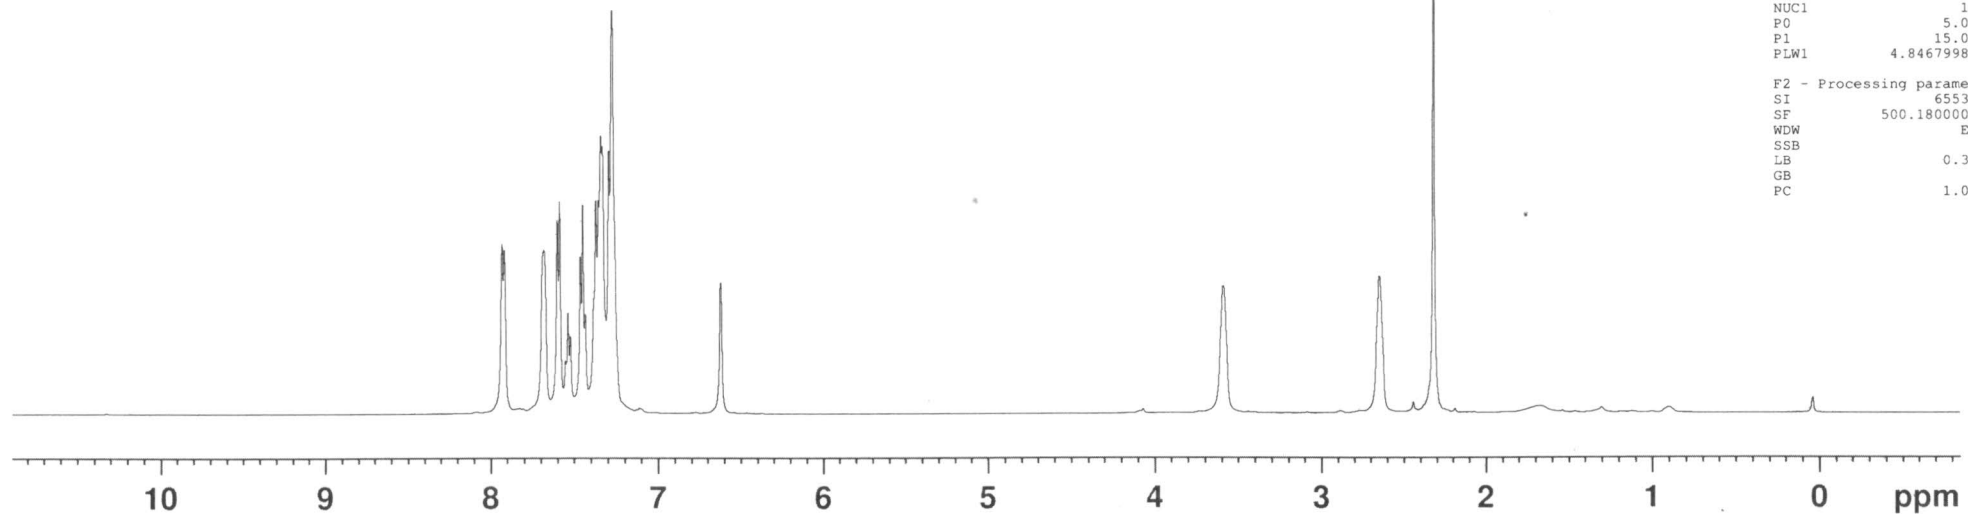

2.00  
2.02  
1.93  
1.07  
2.07  
10.17  
1.01  
2.06  
2.02  
3.05

Current Data Parameters  
NAME K SURESH UPDATED 500  
EXPNO 123  
PROCNO 1

F2 - Acquisition Parameters  
Date\_ 20210728  
Time 16.28 h  
INSTRUM spect  
PROBHD Z109128\_0042 ( )  
PULPROG zg30  
TD 65536  
SOLVENT CDCl3  
NS 16  
DS 2  
SWH 10000.000 Hz  
FIDRES 0.305176 Hz  
AQ 3.2767999 sec  
RG 71.8  
DW 50.000 usec  
DE 13.04 usec  
TE 298.6 K  
D1 1.00000000 sec  
TD0 1  
SFO1 500.1830886 MHz  
NUC1 1H  
P0 5.00 usec  
P1 15.00 usec  
PLW1 4.84679985 W

F2 - Processing parameters  
SI 65536  
SF 500.1800000 MHz  
WDW EM  
SSB 0  
LB 0.30 Hz  
GB 0  
PC 1.00

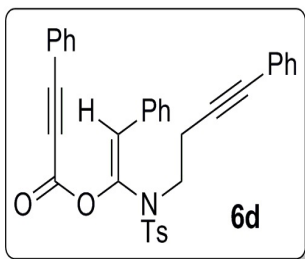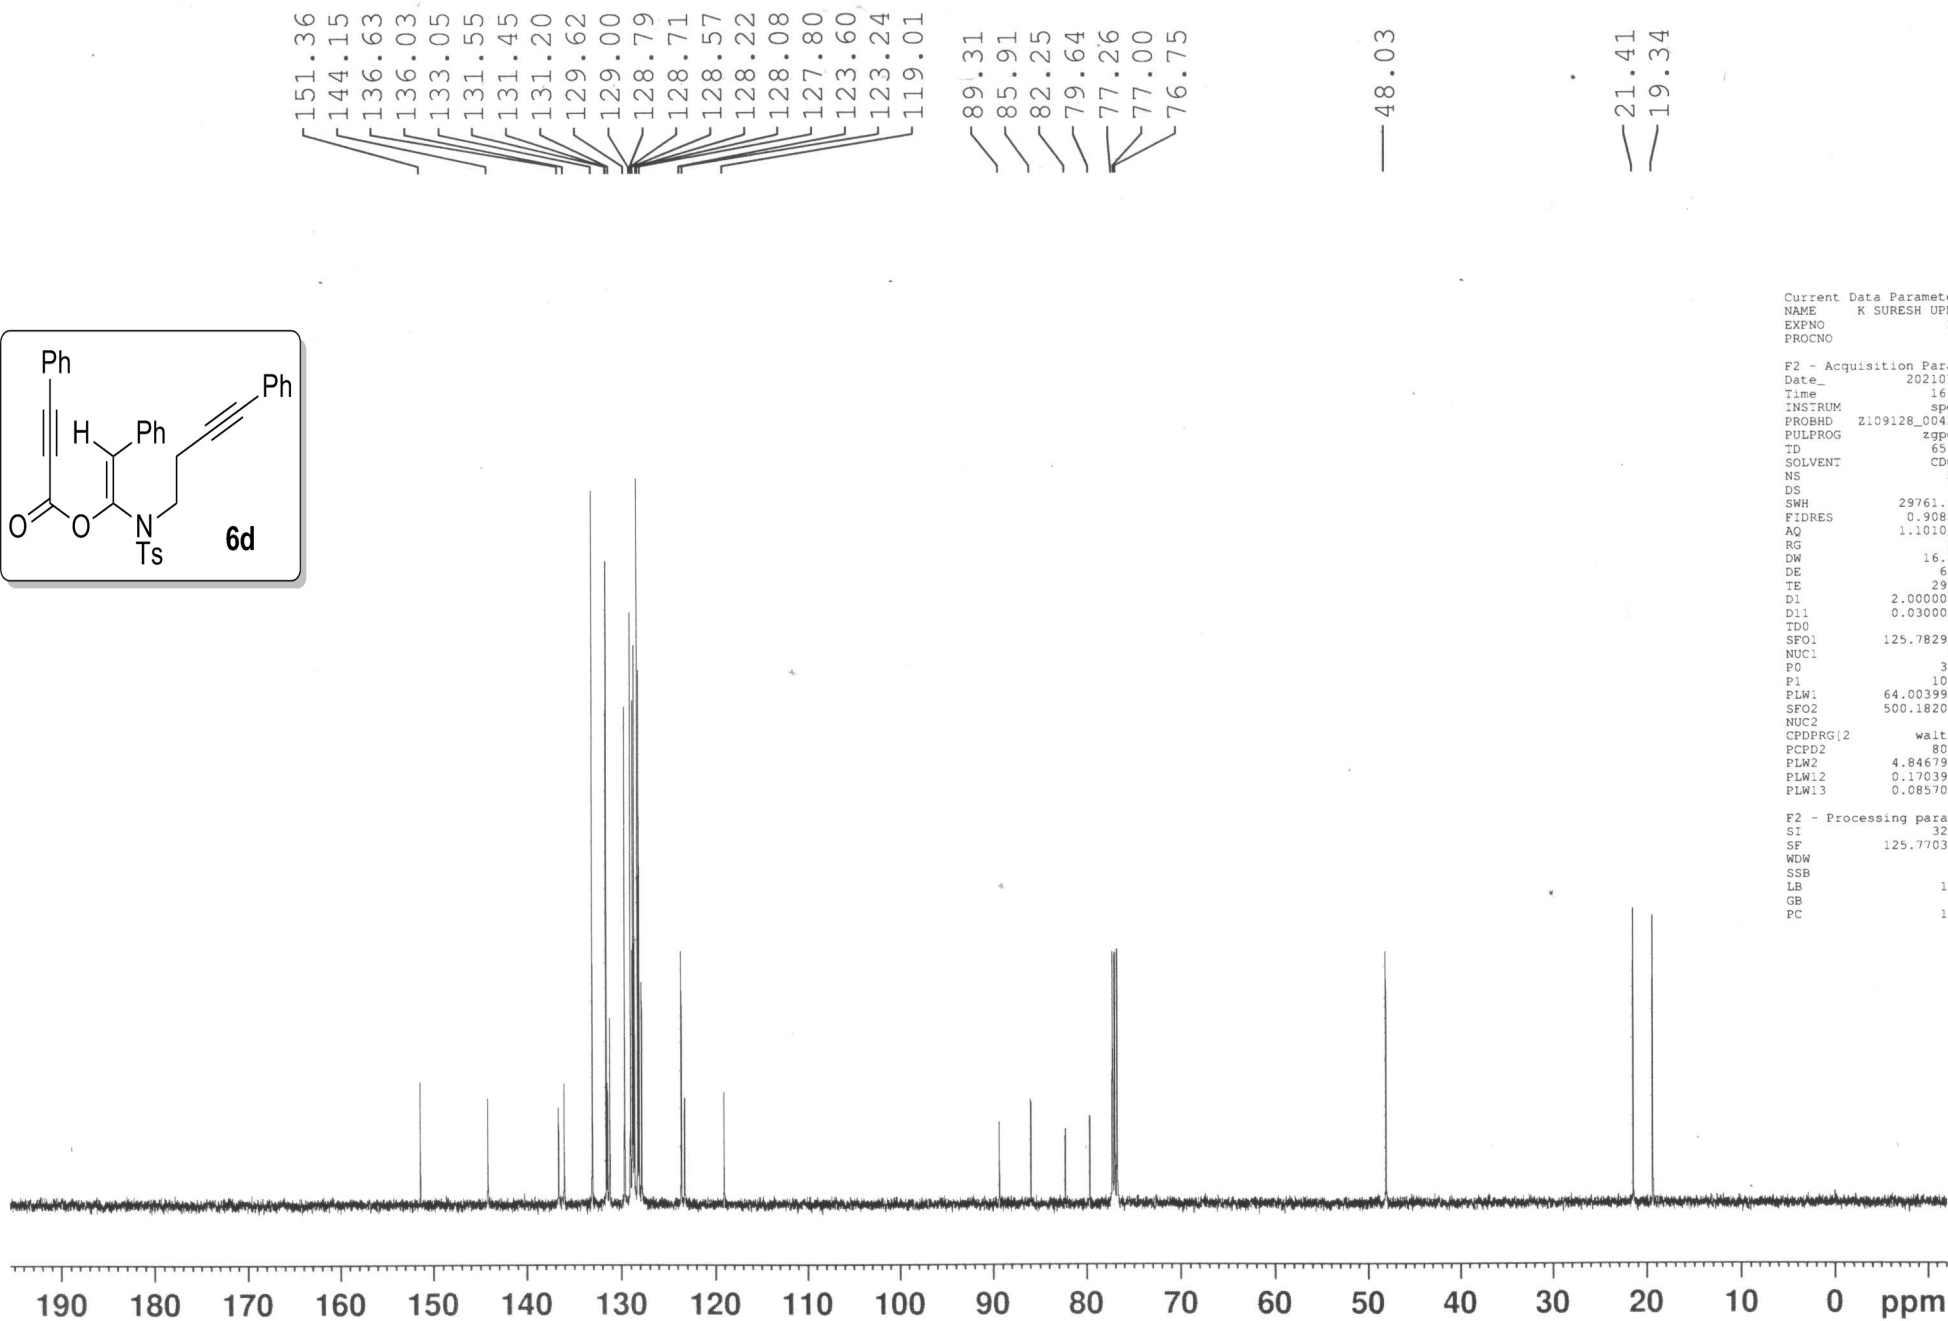

Current Data Parameters  
NAME K SURESH UPDATED 500  
EXPNO 124  
PROCNO 1

F2 - Acquisition Parameters  
Date\_ 20210728  
Time 16.43 h  
INSTRUM spect  
PROBHD z109128\_0042 (zpg30)  
PULPROG zgpg30  
TD 65536  
SOLVENT CDCl3  
NS 293  
DS 4  
SWH 29761.904 Hz  
FIDRES 0.908261 Hz  
AQ 1.1010048 sec  
RG 203  
DW 16.800 usec  
DE 6.50 usec  
TE 299.6 K  
D1 2.00000000 sec  
D11 0.03000000 sec  
TD0 1  
SFO1 125.7829381 MHz  
NUC1 13C  
P0 3.33 usec  
P1 10.00 usec  
PLW1 64.00399780 W  
SFO2 500.1820007 MHz  
NUC2 1H  
CPDPRG[2] waltz65  
PCPD2 80.00 usec  
PLW2 4.84679985 W  
PLW12 0.17039999 W  
PLW13 0.08570800 W

F2 - Processing parameters  
SI 32768  
SF 125.7703709 MHz  
WDW EM  
SSB 0  
LB 1.00 Hz  
GB 0  
PC 1.40

8.497  
8.460  
8.456  
8.454  
8.419  
8.414  
7.891  
7.871  
7.635  
7.632  
7.615  
7.583  
7.580  
7.563  
7.559  
7.530  
7.527  
7.517  
7.512  
7.506  
7.496  
7.493  
7.442  
7.422  
7.407  
7.404  
7.364  
7.360  
7.355  
7.344  
7.325  
7.314  
7.311  
7.293  
7.282  
7.260  
6.580  
3.593  
3.576  
3.555  
2.689  
2.671  
2.650  
2.296

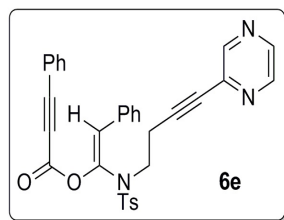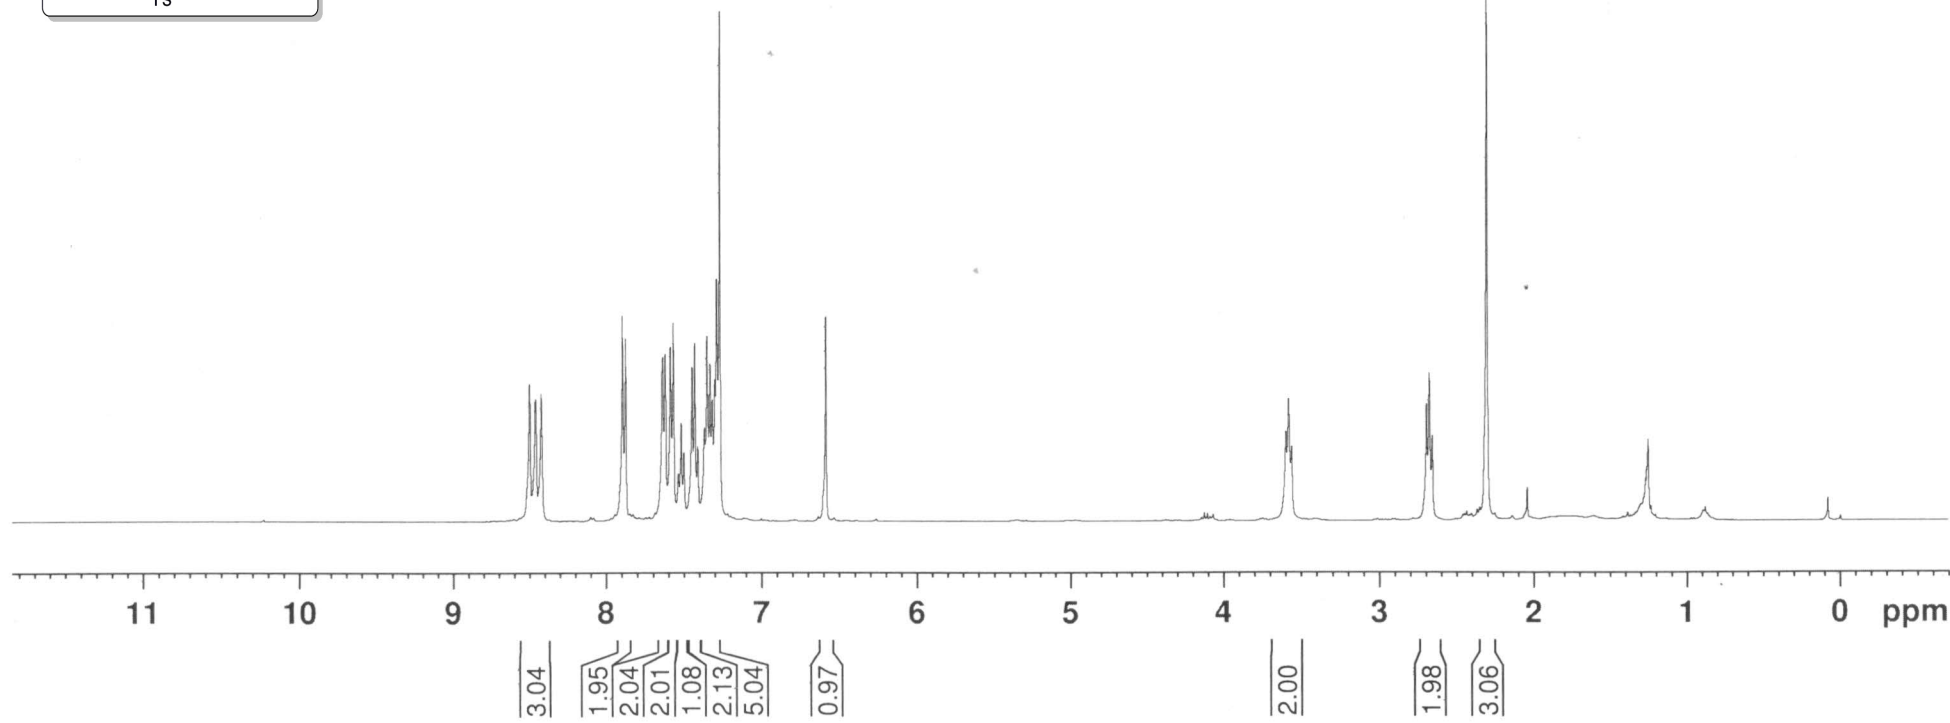



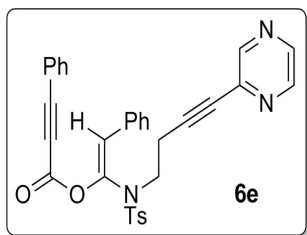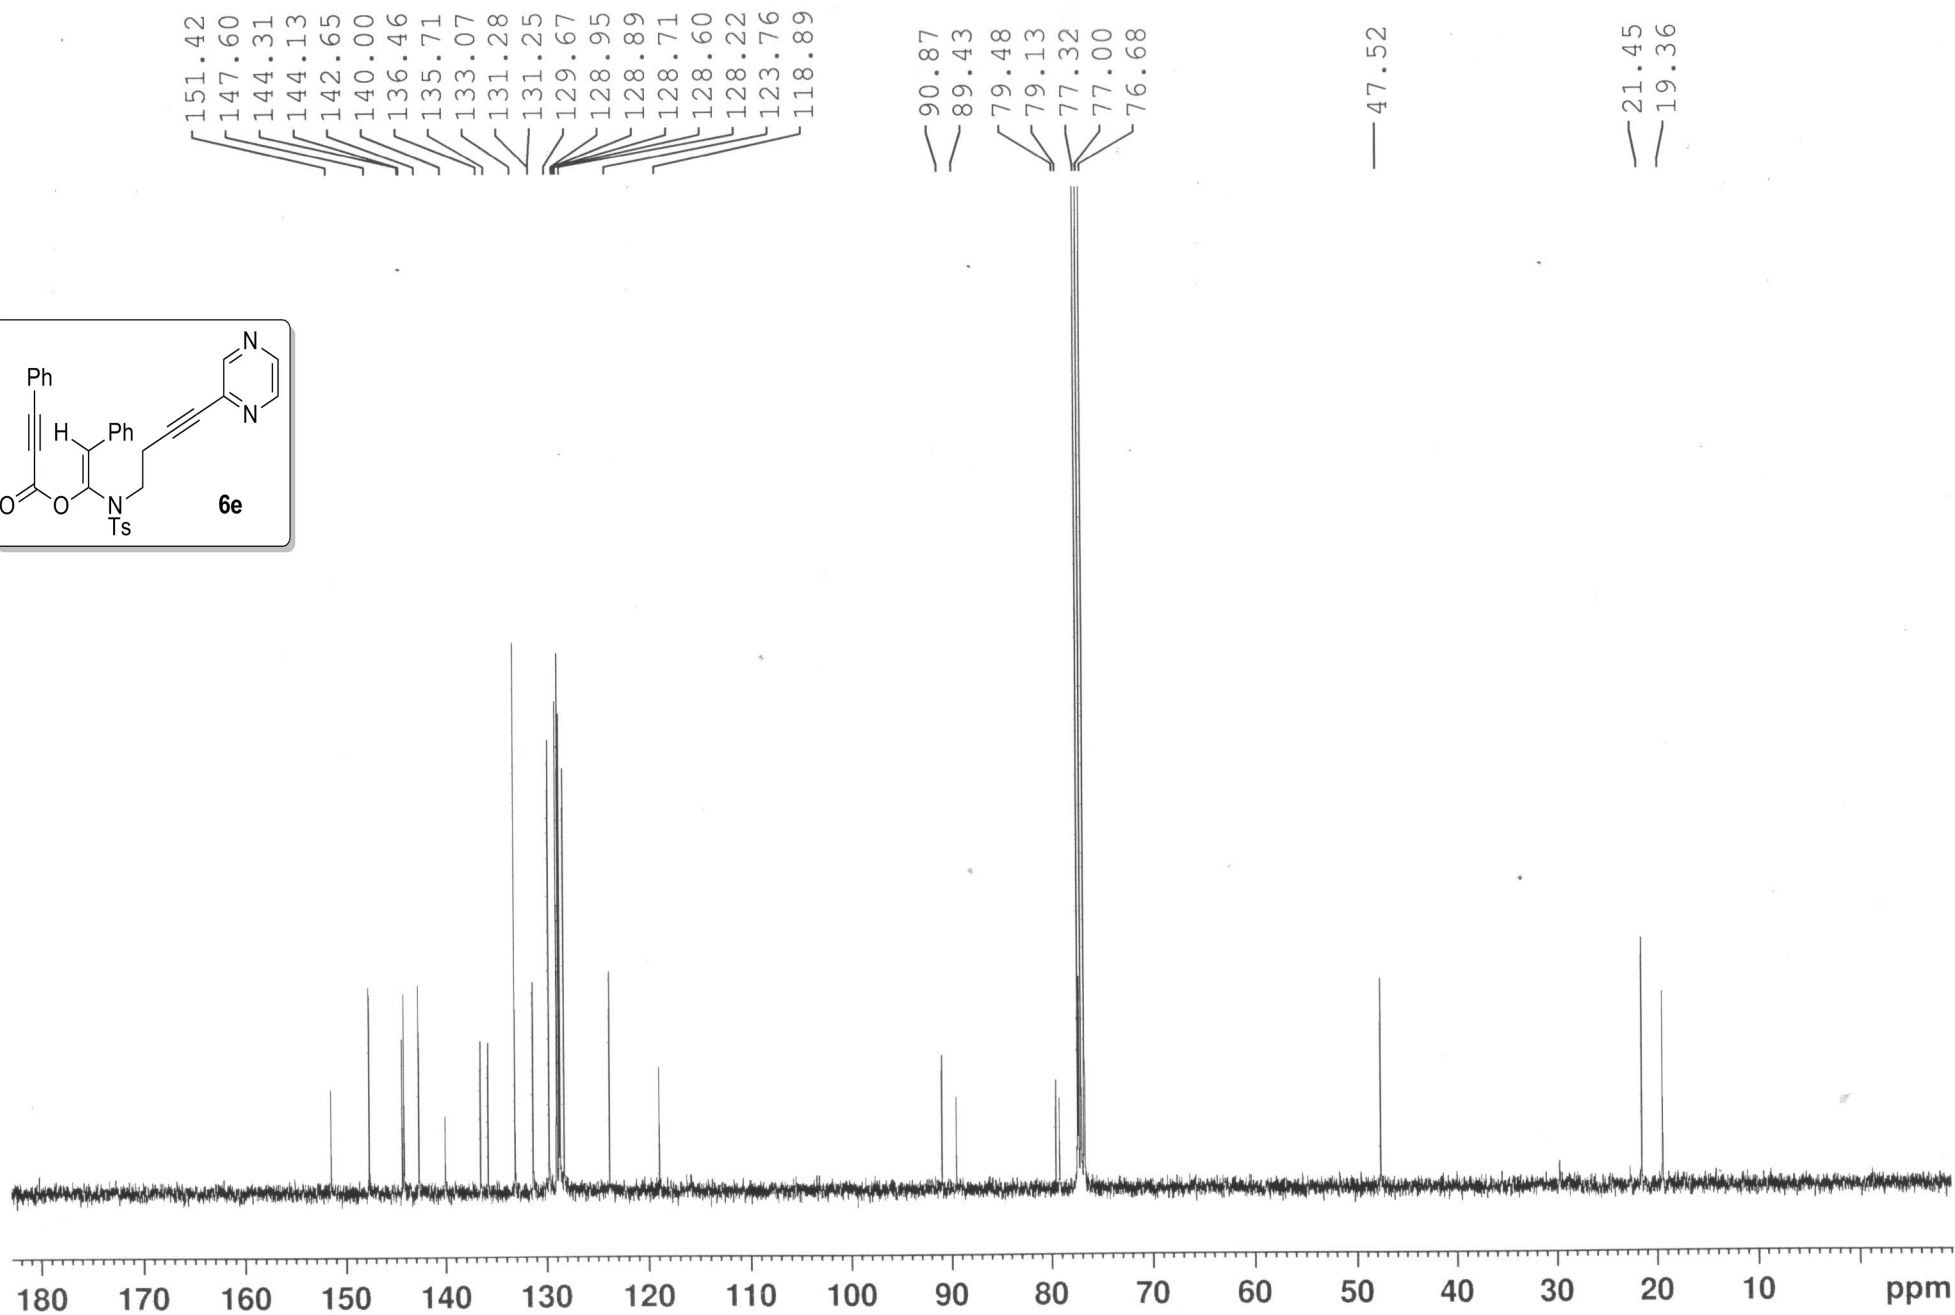

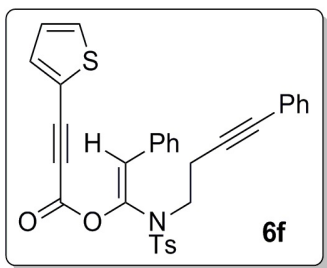

7.929  
7.912  
7.696  
7.681  
7.564  
7.554  
7.532  
7.525  
7.383  
7.369  
7.354  
7.339  
7.334  
7.329  
7.311  
7.295  
7.273  
7.262  
7.125  
7.116  
7.108  
6.620

3.604  
3.589  
3.574

2.659  
2.644  
2.629  
2.334

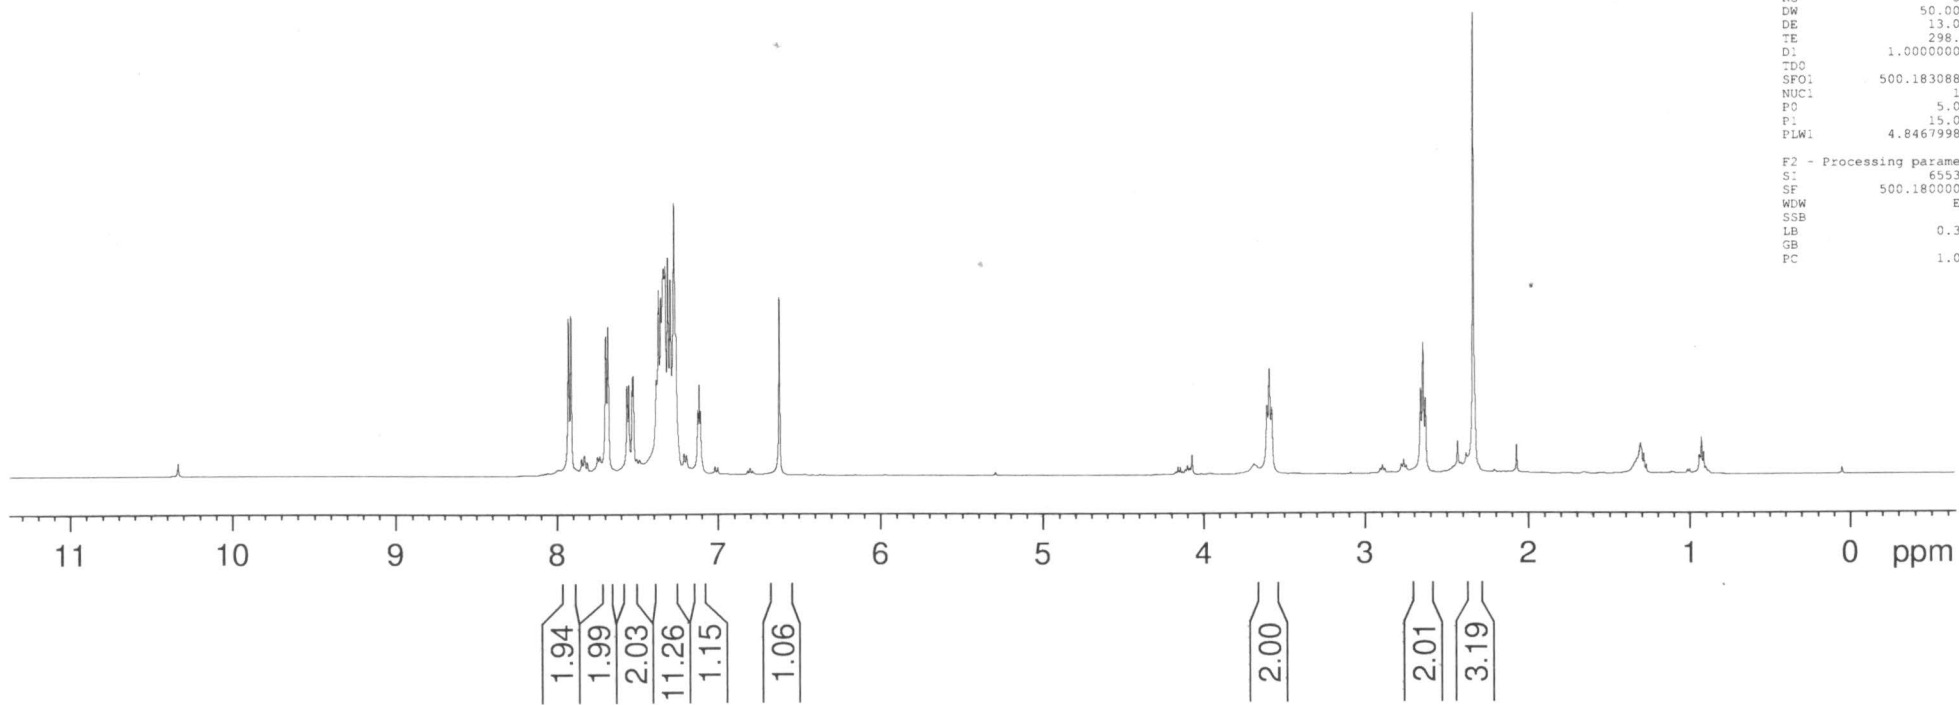

Current Data Parameters  
NAME RP UPDATED 500 1  
EXPNO 48  
PROCNO 1

F2 - Acquisition Parameters  
Date\_ 20210812  
Time 15.21 h  
INSTRUM spect  
PROBHD Z109128\_0042 ( )  
PULPROG zg30  
TD 65536  
SOLVENT CDCl3  
NS 16  
DS 2  
SWH 10000.000 Hz  
FIDRES 0.305176 Hz  
AQ 3.2767999 sec  
RG 32  
DW 50.000 usec  
DE 13.04 usec  
TE 298.4 K  
D1 1.0000000 sec  
TDO 1  
SFO1 500.1830886 MHz  
NUC1 1H  
PO 5.00 usec  
PI 15.00 usec  
PLW1 4.84679985 W

F2 - Processing parameters  
SI 65536  
SF 500.1800000 MHz  
WDW EM  
SSB 0  
LB 0.30 Hz  
GB 0  
PC 1.00

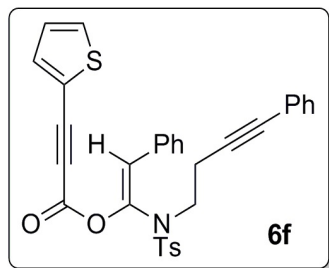

151.19  
144.19  
137.20  
136.43  
135.80  
132.07  
131.47  
131.32  
129.59  
128.93  
128.74  
128.50  
128.11  
128.02  
127.75  
123.56  
123.11  
118.59

85.82  
83.91  
83.37  
82.18  
77.32  
77.00  
76.68

— 47.92

— 21.38  
— 19.24

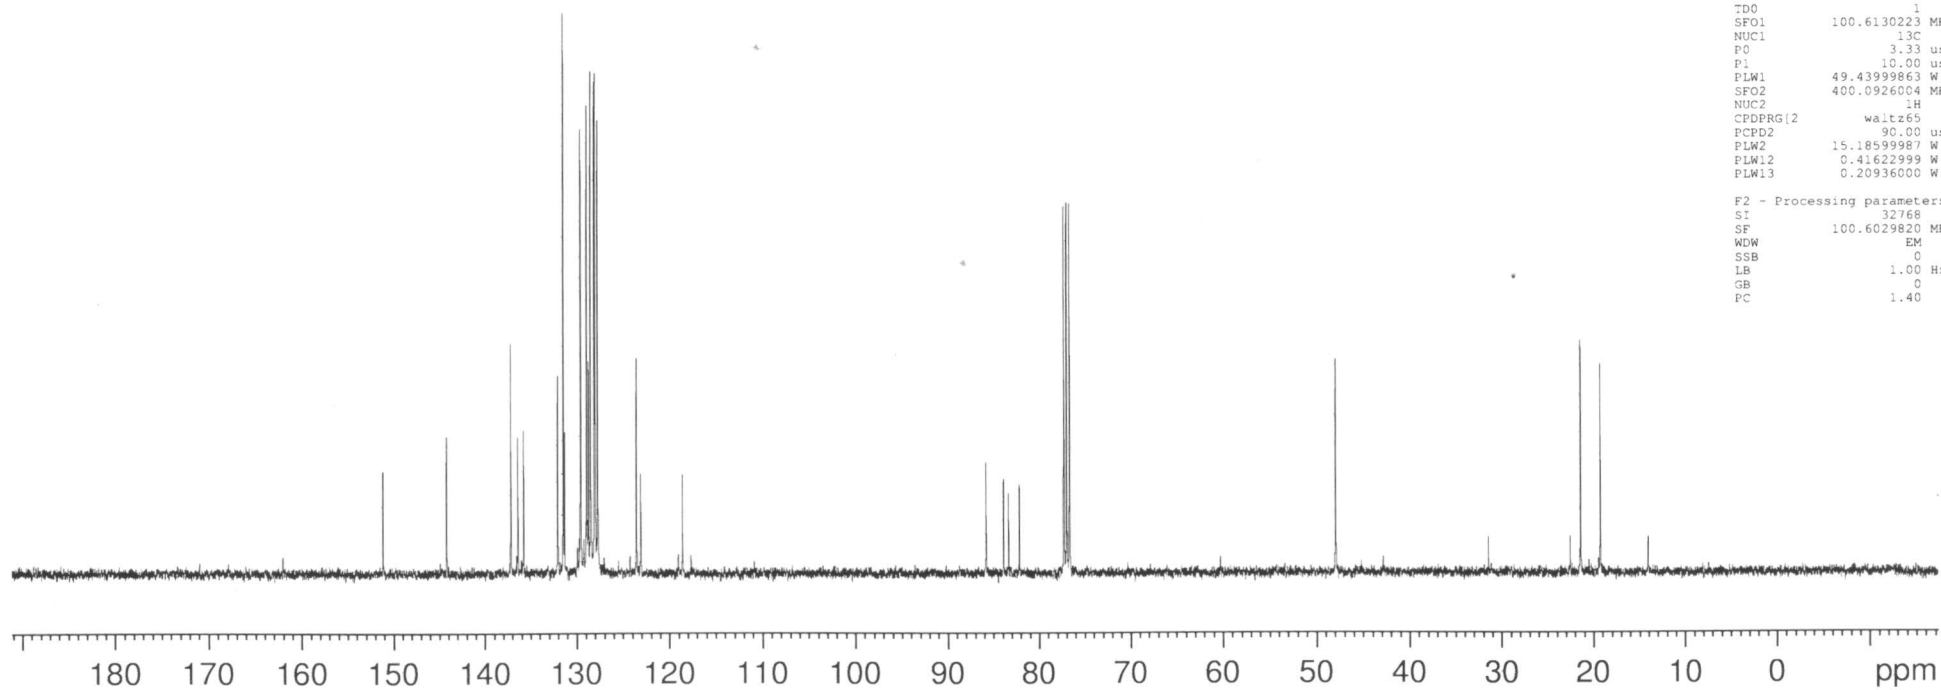

Current Data Parameters  
NAME RP Updated 400  
EXPNO 42  
PROCNO 1

F2 - Acquisition Parameters  
Date\_ 20210812  
Time 15.00 h  
INSTRUM spect  
PROBHD Z108618\_0098 ( )  
PULPROG zgpg30  
TD 65536  
SOLVENT CDCl3  
NS 268  
DS 4  
SWH 24038.461 Hz  
FIDRES 0.733596 Hz  
AQ 1.3631488 sec  
RG 1030  
DW 20.800 usec  
DE 6.50 usec  
TE 804.8 K  
D1 2.00000000 sec  
D11 0.03000000 sec  
TD0 1  
SFO1 100.6130223 MHz  
NUC1 13C  
P0 3.33 usec  
P1 10.00 usec  
PLW1 49.43999863 W  
SFO2 400.0926004 MHz  
NUC2 1H  
CPDPRG12 waltz65  
PCPD2 90.00 usec  
PLW2 15.18599987 W  
PLW12 0.41622999 W  
PLW13 0.20936000 W

F2 - Processing parameters  
SI 32768  
SF 100.6029820 MHz  
WDW EM  
SSB 0  
LB 1.00 Hz  
GB 0  
PC 1.40

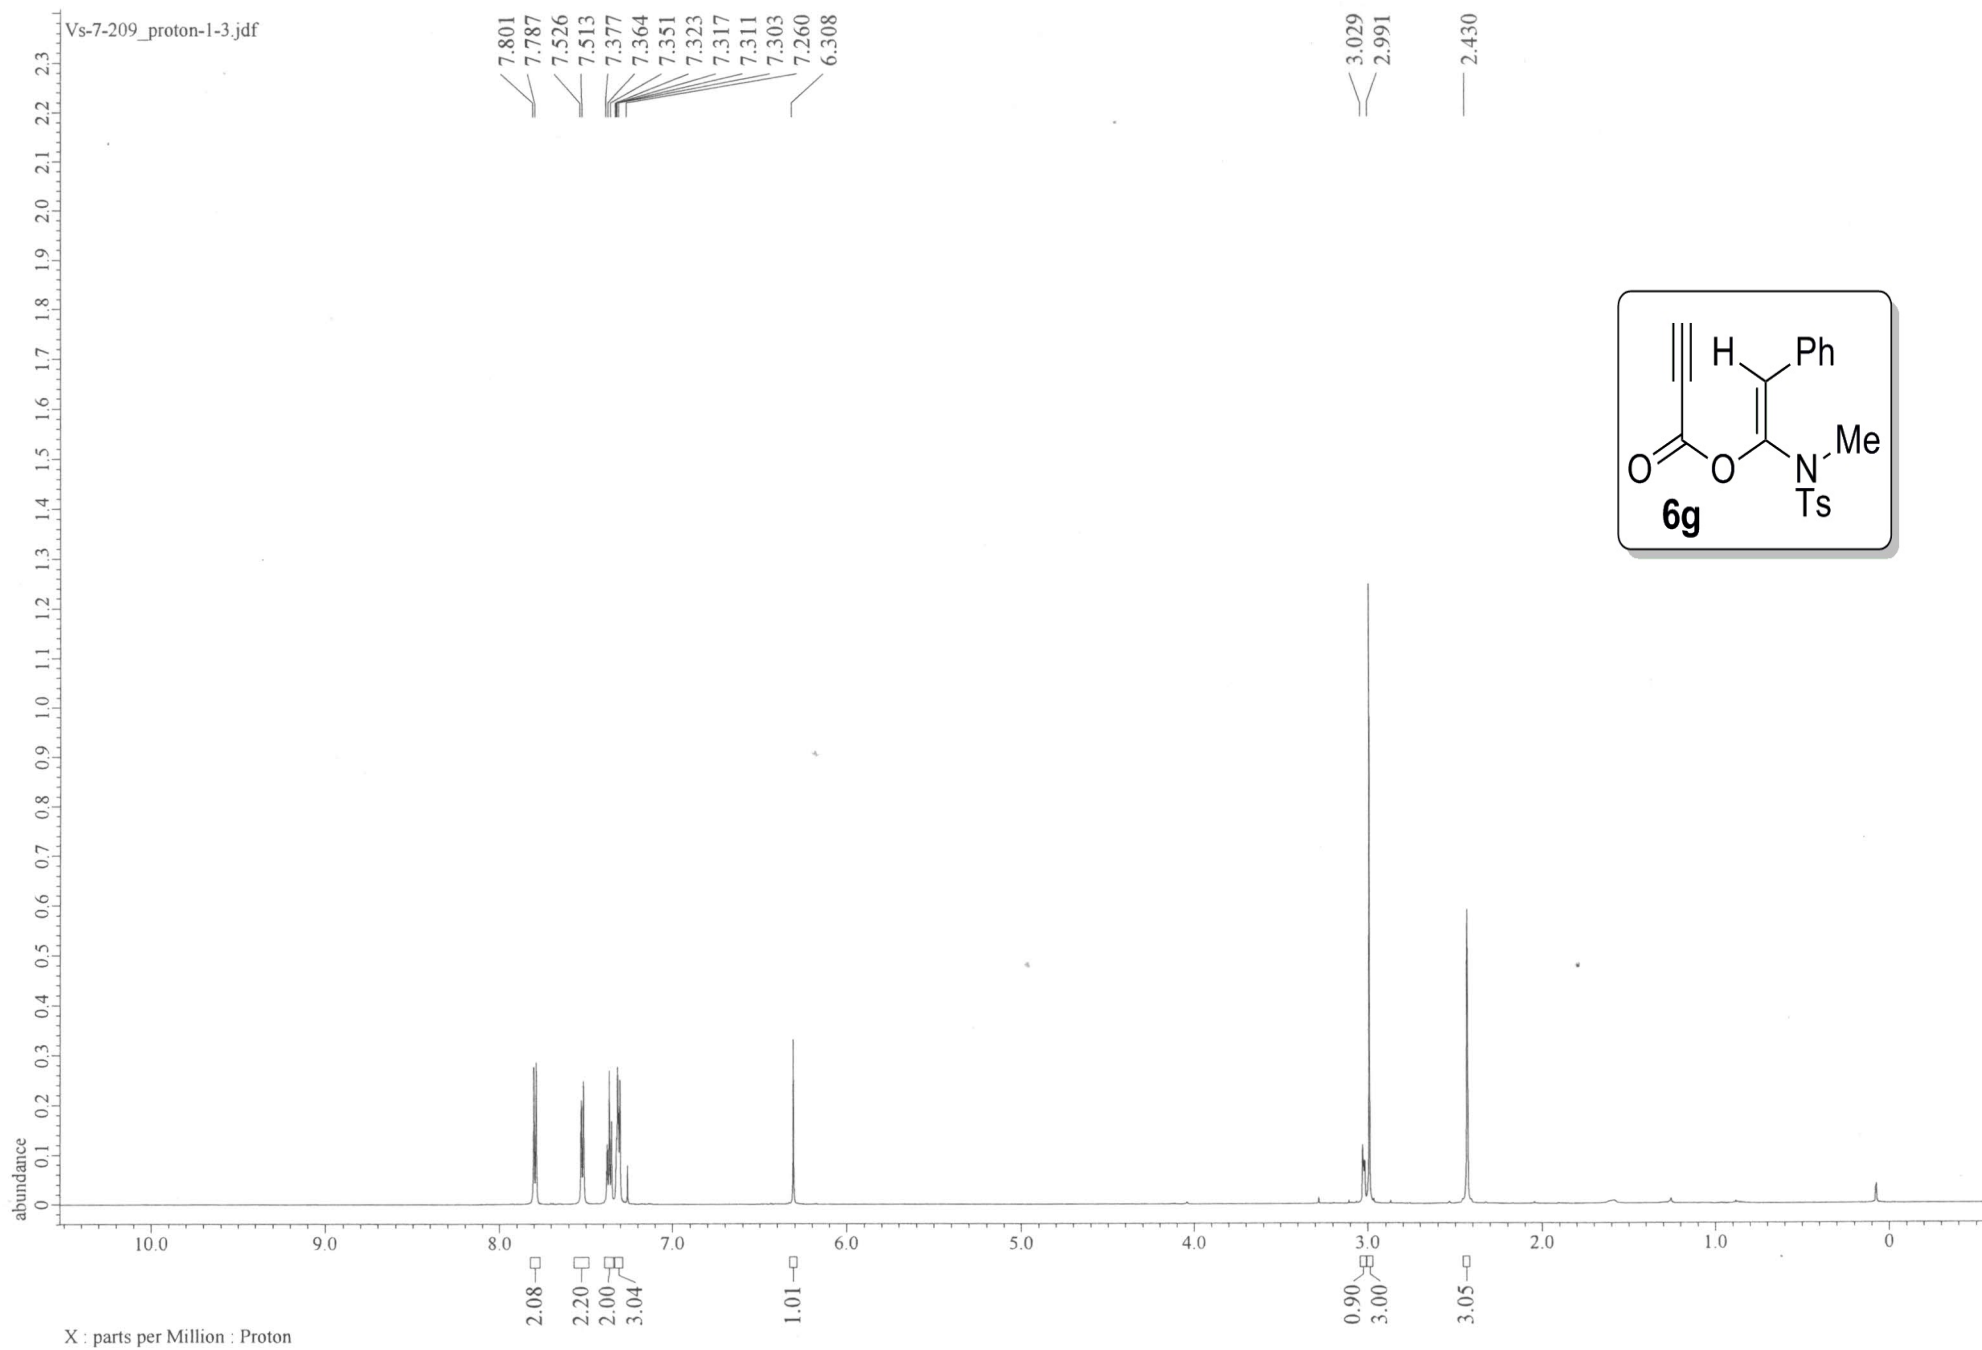

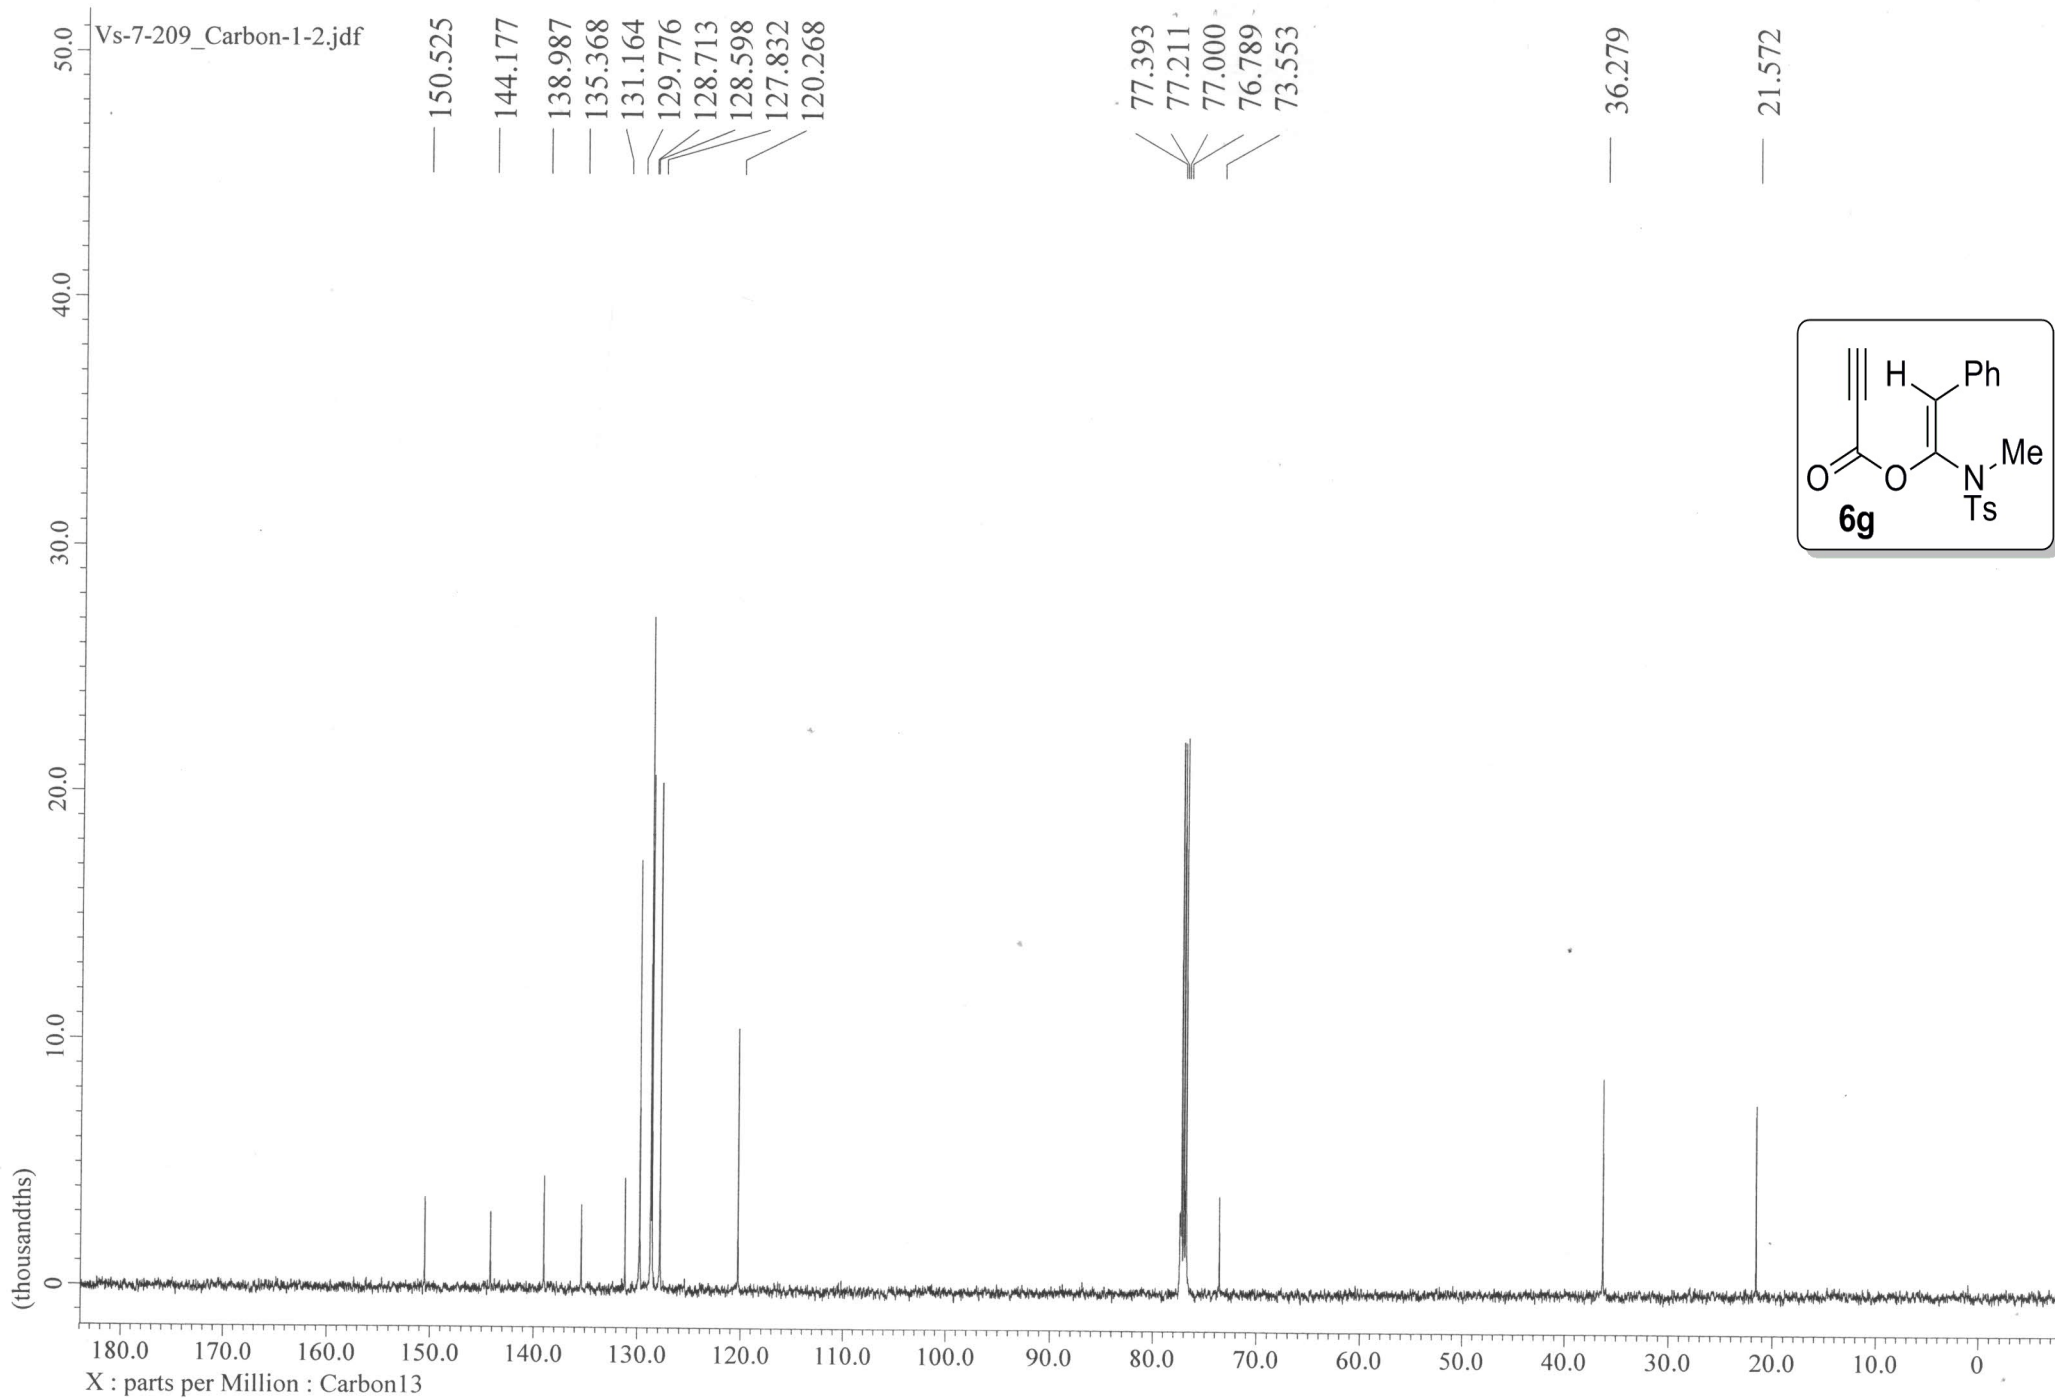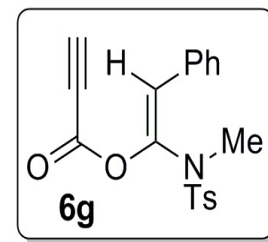

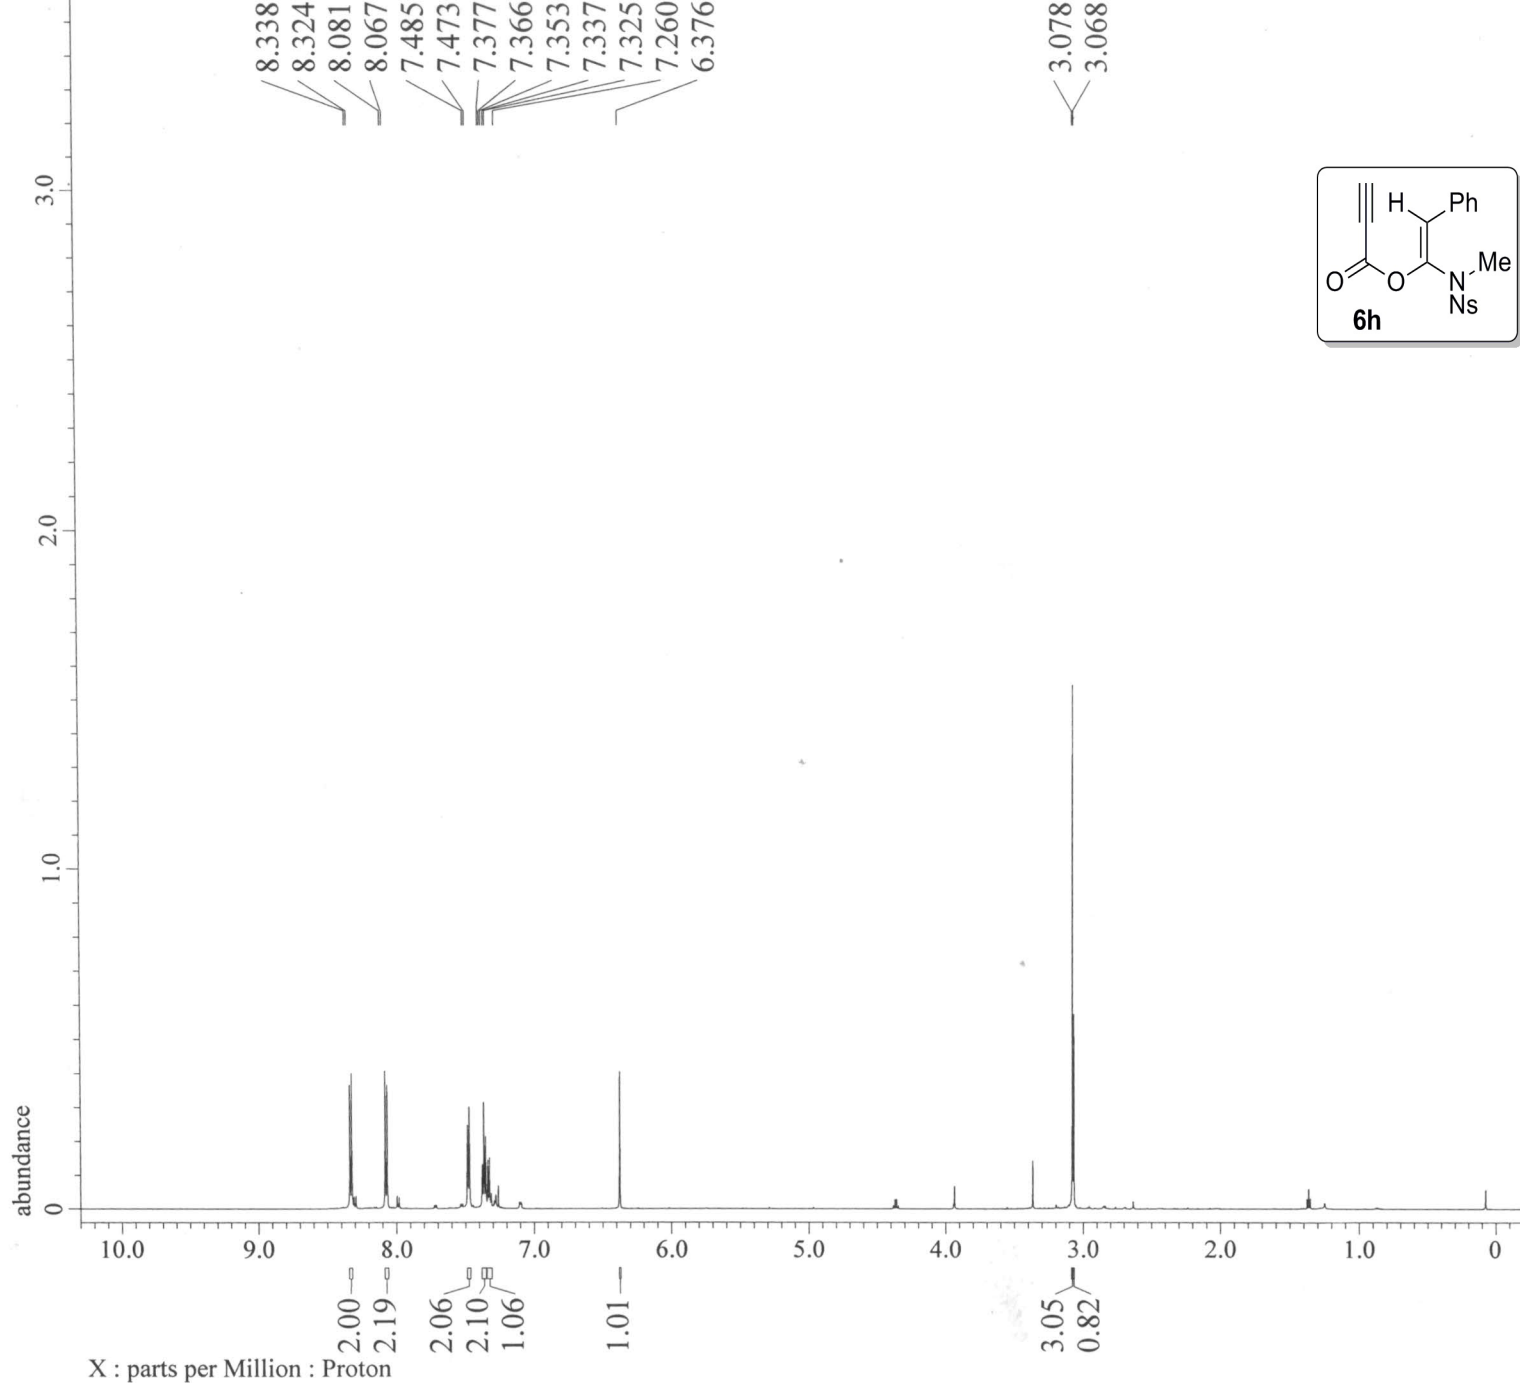

```

Filename      = vs-18-118_Proton-1-7.
Author       = delta
Experiment   = proton auto.jxp
Sample_Id    = vs-18-118
Solvent      = CHLOROFORM-D
Actual_Start_Time = 18-JAN-2021 15:56:45
Revision_Time  = 15-AUG-2021 13:58:19

Comment      = single_pulse
Data_Format  = 1D_COMPLEX
Dim_Size     = 52429
X_Domain     = Proton
Dim_Title    = Proton
Dim_Units    = [ppm]
Dimensions   = X
Site         = ACRHEM UOH
Spectrometer = JNM-ECZ600R/M1

Field_Strength = 14.09636928[T] (600[M]
X_Acq_Duration = 0.72876032[s]
X_Domain       = Proton
X_Freq         = 600.1723046[MHz]
X_Offset       = 5[ppm]
X_Points       = 16384
X_Prescans     = 1
X_Resolution   = 1.37219326[Hz]
X_Sweep        = 22.48201439[kHz]
X_Sweep_Clippped = 17.98561151[kHz]
Irr_Domain     = Proton
Irr_Freq       = 600.1723046[MHz]
Irr_Offset     = 5[ppm]
Tri_Domain     = Proton
Tri_Freq       = 600.1723046[MHz]
Tri_Offset     = 5[ppm]
Blanking       = 2[us]
Clipped        = FALSE
Scans          = 16
Total_Scans    = 16

Relaxation_Delay = 5[s]
Recvr_Gain       = 46
Temp_Get         = 19.8[dC]
X_90_Width      = 6.89[us]
X_Acq_Time      = 0.72876032[s]
X_Angle         = 45[deg]
X_Atn           = 12.6[dB]
X_Pulse         = 3.445[us]
Irr_Mode        = Off
Tri_Mode        = Off
Dante_Loop      = 500
Dante_Presat   = FALSE
Decimation_Rate = 0
Experiment_Path = c:\Program Files\JEOL
Initial_Wait    = 1[s]
Phase           = {0, 90, 270, 180, 180
Presat_Time     = 5[s]
Presat_Time_Flag = FALSE
Relaxation_Delay_Calc = 0[s]
Relaxation_Delay_Temp = 5[s]
Repetition_Time = 5.72876032[s]

```

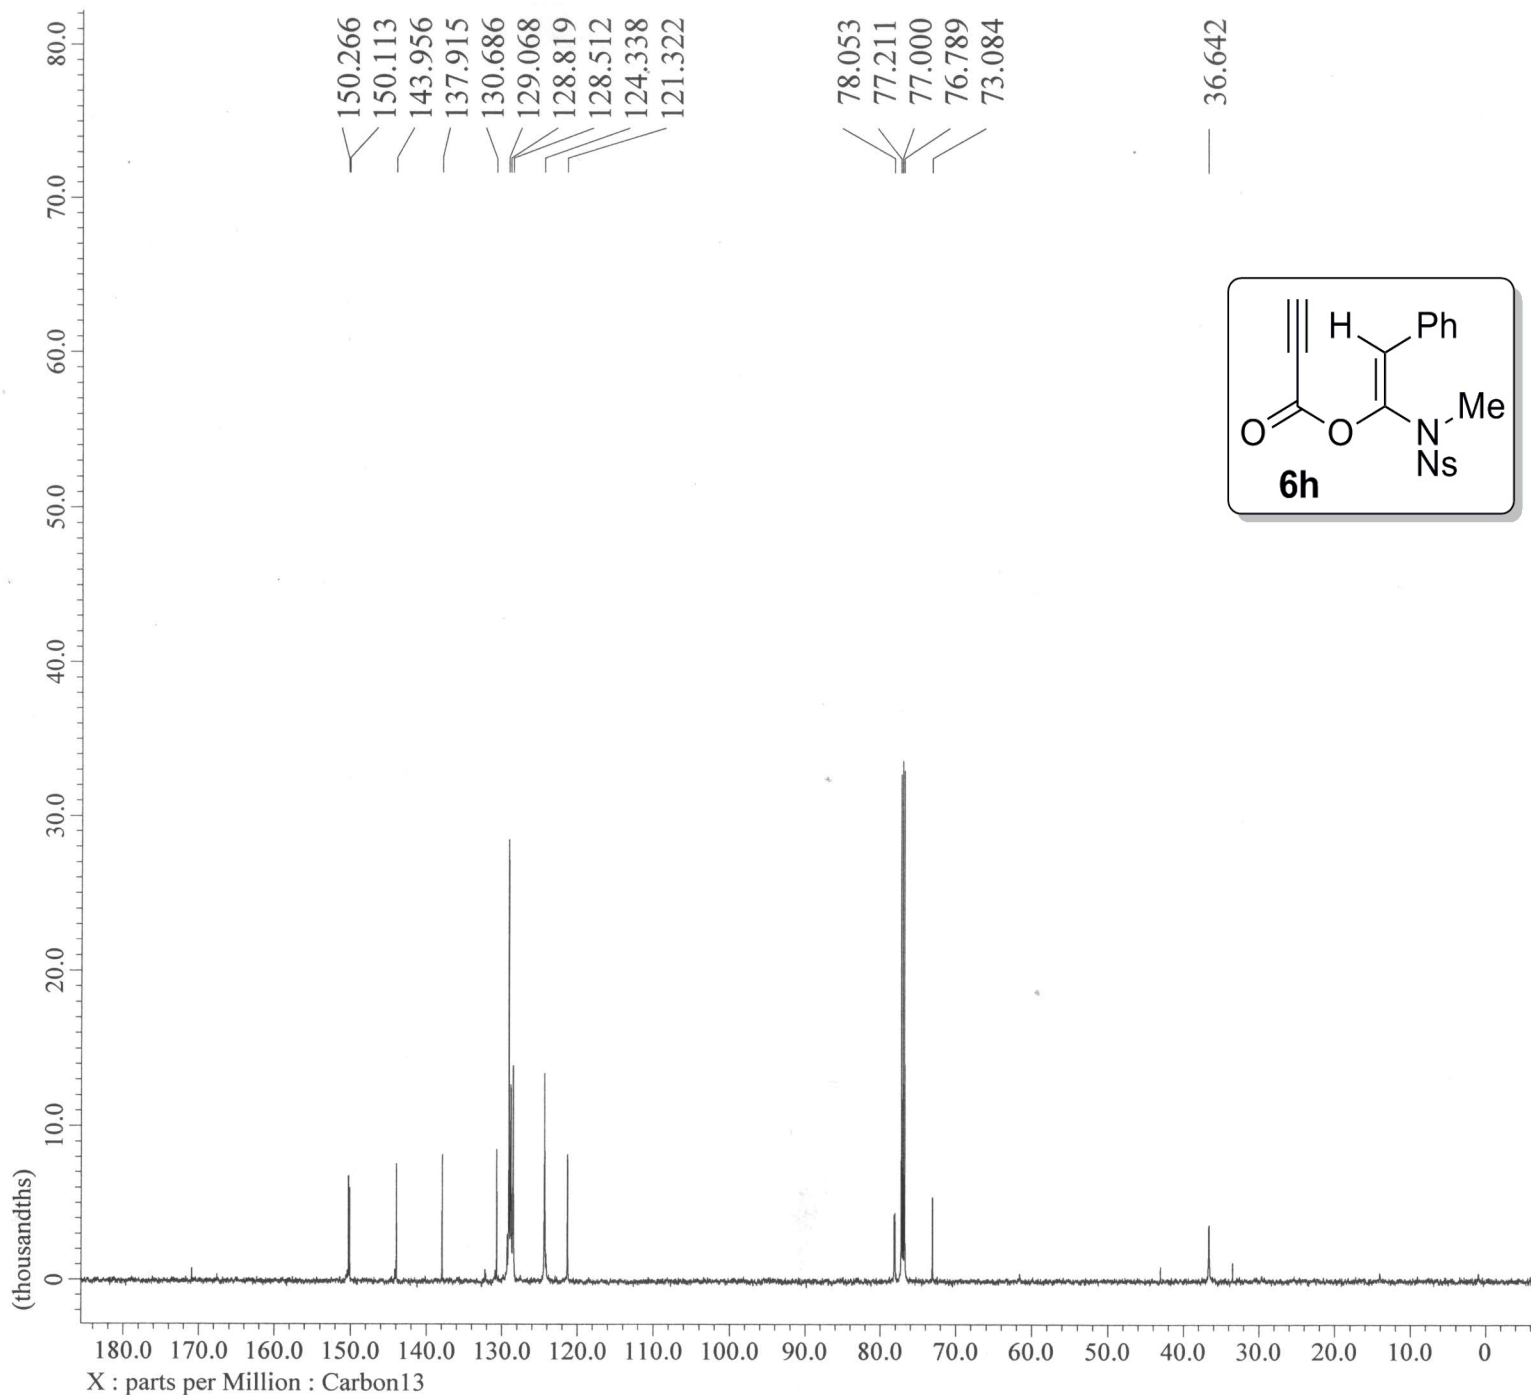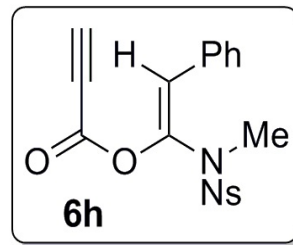

|                          |                      |
|--------------------------|----------------------|
| Filename                 | = vs-18-118_Carbon-1 |
| Author                   | = delta              |
| Experiment               | = carbon_auto.jxp    |
| Sample_Id                | = vs-18-118          |
| Solvent                  | = CHLOROFORM-D       |
| Actual_Start_Time        | = 18-JAN-2021 15:58: |
| Revision_Time            | = 15-AUG-2021 14:25: |
| Comment                  | = single pulse decou |
| Data_Format              | = 1D_COMPLEX         |
| Dim_Size                 | = 26214              |
| X_Domain                 | = Carbon13           |
| Dim_Title                | = Carbon13           |
| Dim_Units                | = [ppm]              |
| Dimensions               | = X                  |
| Site                     | = ACRHEM UOH         |
| Spectrometer             | = JNM-ECZ600R/ML     |
| Field_Strength           | = 14.09636928[T] (60 |
| X_Acq_Duration           | = 0.34603008[s]      |
| X_Domain                 | = Carbon13           |
| X_Freq                   | = 150.91343039[MHz]  |
| X_Offset                 | = 100[ppm]           |
| X_Points                 | = 16384              |
| X_Prescans               | = 4                  |
| X_Resolution             | = 2.88992217[Hz]     |
| X_Sweep                  | = 47.34848485[kHz]   |
| X_Sweep_Clipped          | = 37.87878788[kHz]   |
| Irr_Domain               | = Proton             |
| Irr_Freq                 | = 600.1723046[MHz]   |
| Irr_Offset               | = 5[ppm]             |
| Blanking                 | = 2[us]              |
| Clipped                  | = FALSE              |
| Scans                    | = 401                |
| Total_Scans              | = 401                |
| Relaxation_Delay         | = 2[s]               |
| Recvr_Gain               | = 56                 |
| Temp_Get                 | = 19.6[dC]           |
| X_90_Width               | = 11[us]             |
| X_Acq_Time               | = 0.34603008[s]      |
| X_Angle                  | = 30[deg]            |
| X_Atn                    | = 10.3[dB]           |
| X_Pulse                  | = 3.66666667[us]     |
| Irr_Atn_Dec              | = 33.452[dB]         |
| Irr_Atn_Dec_Calc         | = 33.452[dB]         |
| Irr_Atn_Dec_Default_Calc | = 33.452[dB]         |
| Irr_Atn_Noise            | = 33.452[dB]         |
| Irr_Dec_Bandwidth_Hz     | = 7.23684211[kHz]    |
| Irr_Dec_Bandwidth_Ppm    | = 12.05794078[ppm]   |
| Irr_Dec_Freq             | = 600.1723046[MHz]   |
| Irr_Dec_Merit_Factor     | = 2.2                |
| Irr_Decoupling           | = TRUE               |
| Irr_Noise                | = TRUE               |
| Irr_Noise                | = WALTZ              |
| Irr_Offset_Default       | = 5[ppm]             |
| Irr_Pwidth               | = 76[us]             |
| Irr_Pwidth_Default       | = 76[us]             |
| Irr_Pwidth_Default_Calc  | = 76[us]             |
| Irr_Pwidth_Templ         | = 76[us]             |
| Irr_Wurst                | = FALSE              |
| Decimation_Rate          | = 0                  |
| Experiment_Path          | = c:\Program Files\J |
| Initial_Wait             | = 1[s]               |
| Noe_Time                 | = 2[s]               |
| Noe_Time_Flag            | = FALSE              |
| Relaxation_Delay_Calc    | = 0[s]               |
| Relaxation_Delay_Temp    | = 2[s]               |

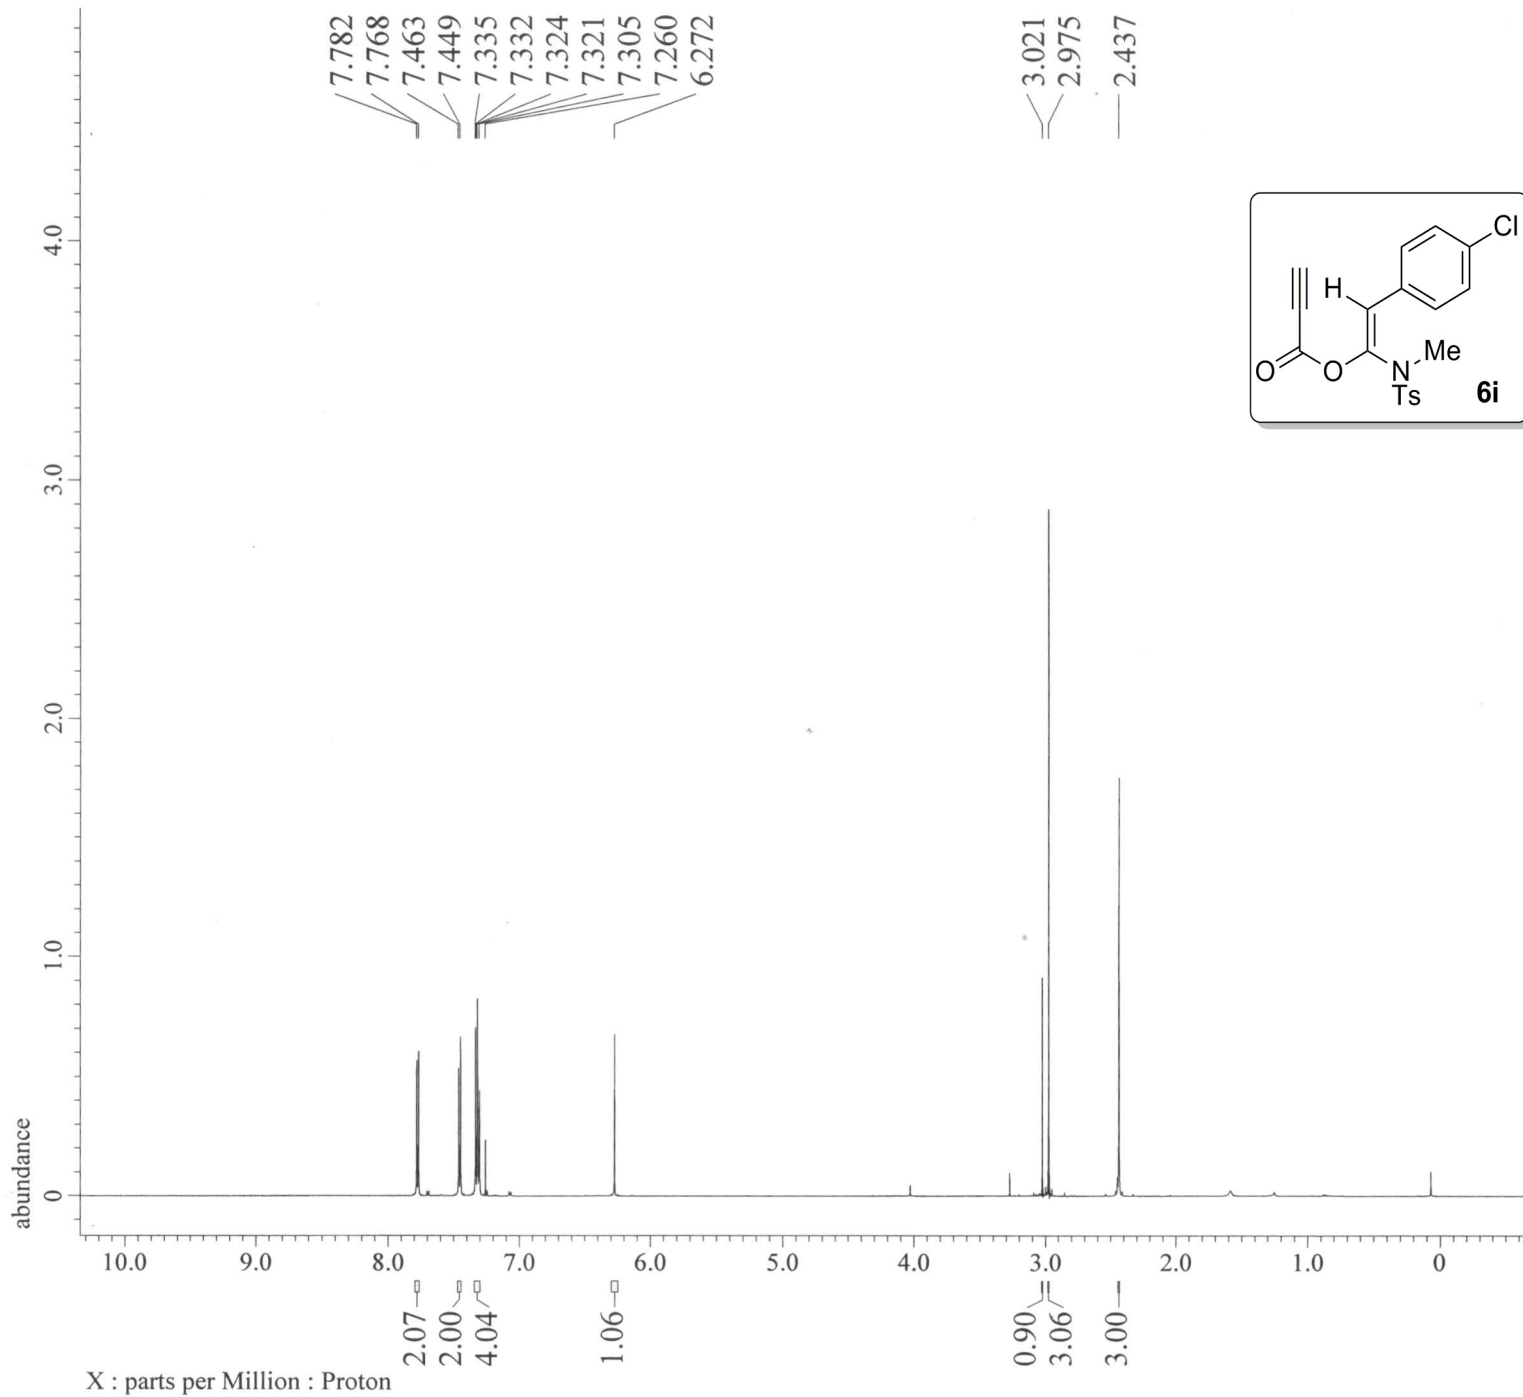

```

Filename           = Vs-7-92_proton-1-6.jd
Author            = delta
Experiment        = proton_auto.jsp
Sample_Id         = Vs-7-92
Solvent           = CHLOROFORM-D
Actual_Start_Time = 23-FEB-2021 16:41:28
Revision_Time     = 15-AUG-2021 15:41:21

Comment           = single_pulse
Data Format       = 1D COMPLEX
Dim_Size         = 52429
X_Domain        = Proton
Dim Title       = Proton
Dim Units       = [ppm]
Dimensions      = X
Site            = ACRHEM_UOH
Spectrometer    = JNM-ECZ600R/M1

Field_Strength   = 14.09636928[T] (600[M
X_Acq_Duration  = 0.72876032[s]
X_Domain        = Proton
X_Freq          = 600.1723046[MHz]
X_Offset        = 6.5[ppm]
X_Points        = 16384
X_Prescans      = 1
X_Resolution    = 1.37219326[Hz]
X_Sweep         = 22.48201439[kHz]
X_Sweep_Clipped = 17.98561151[kHz]
Irr_Domain      = Proton
Irr_Freq        = 600.1723046[MHz]
Irr_Offset      = 5[ppm]
Tri_Domain      = Proton
Tri_Freq        = 600.1723046[MHz]
Tri_Offset      = 5[ppm]
Blanking        = 2[us]
Clipped         = FALSE
Scans           = 16
Total_Scans     = 16

Relaxation_Delay = 5[s]
Recvr_Gain       = 46
Temp_Get         = 19.6[dC]
X_90_Width      = 6.89[us]
X_Acq_Time      = 0.72876032[s]
X_Angle         = 45[deg]
X_Atn           = 12.6[dB]
X_Pulse         = 3.445[us]
Irr_Mode        = Off
Tri_Mode        = Off
Dante_Loop      = 500
Dante_Presat    = FALSE
Decimation_Rate = 0
Experiment_Path  = C:\Users\delta\Docume
Initial_Wait     = 1[s]
Phase           = {0, 90, 270, 180, 180
Presat_Time      = 5[s]
Presat_Time_Flag = FALSE
Relaxation_Delay_Calc = 0[s]
Relaxation_Delay_Temp = 5[s]
Repetition_Time = 5.72876032[s]

```



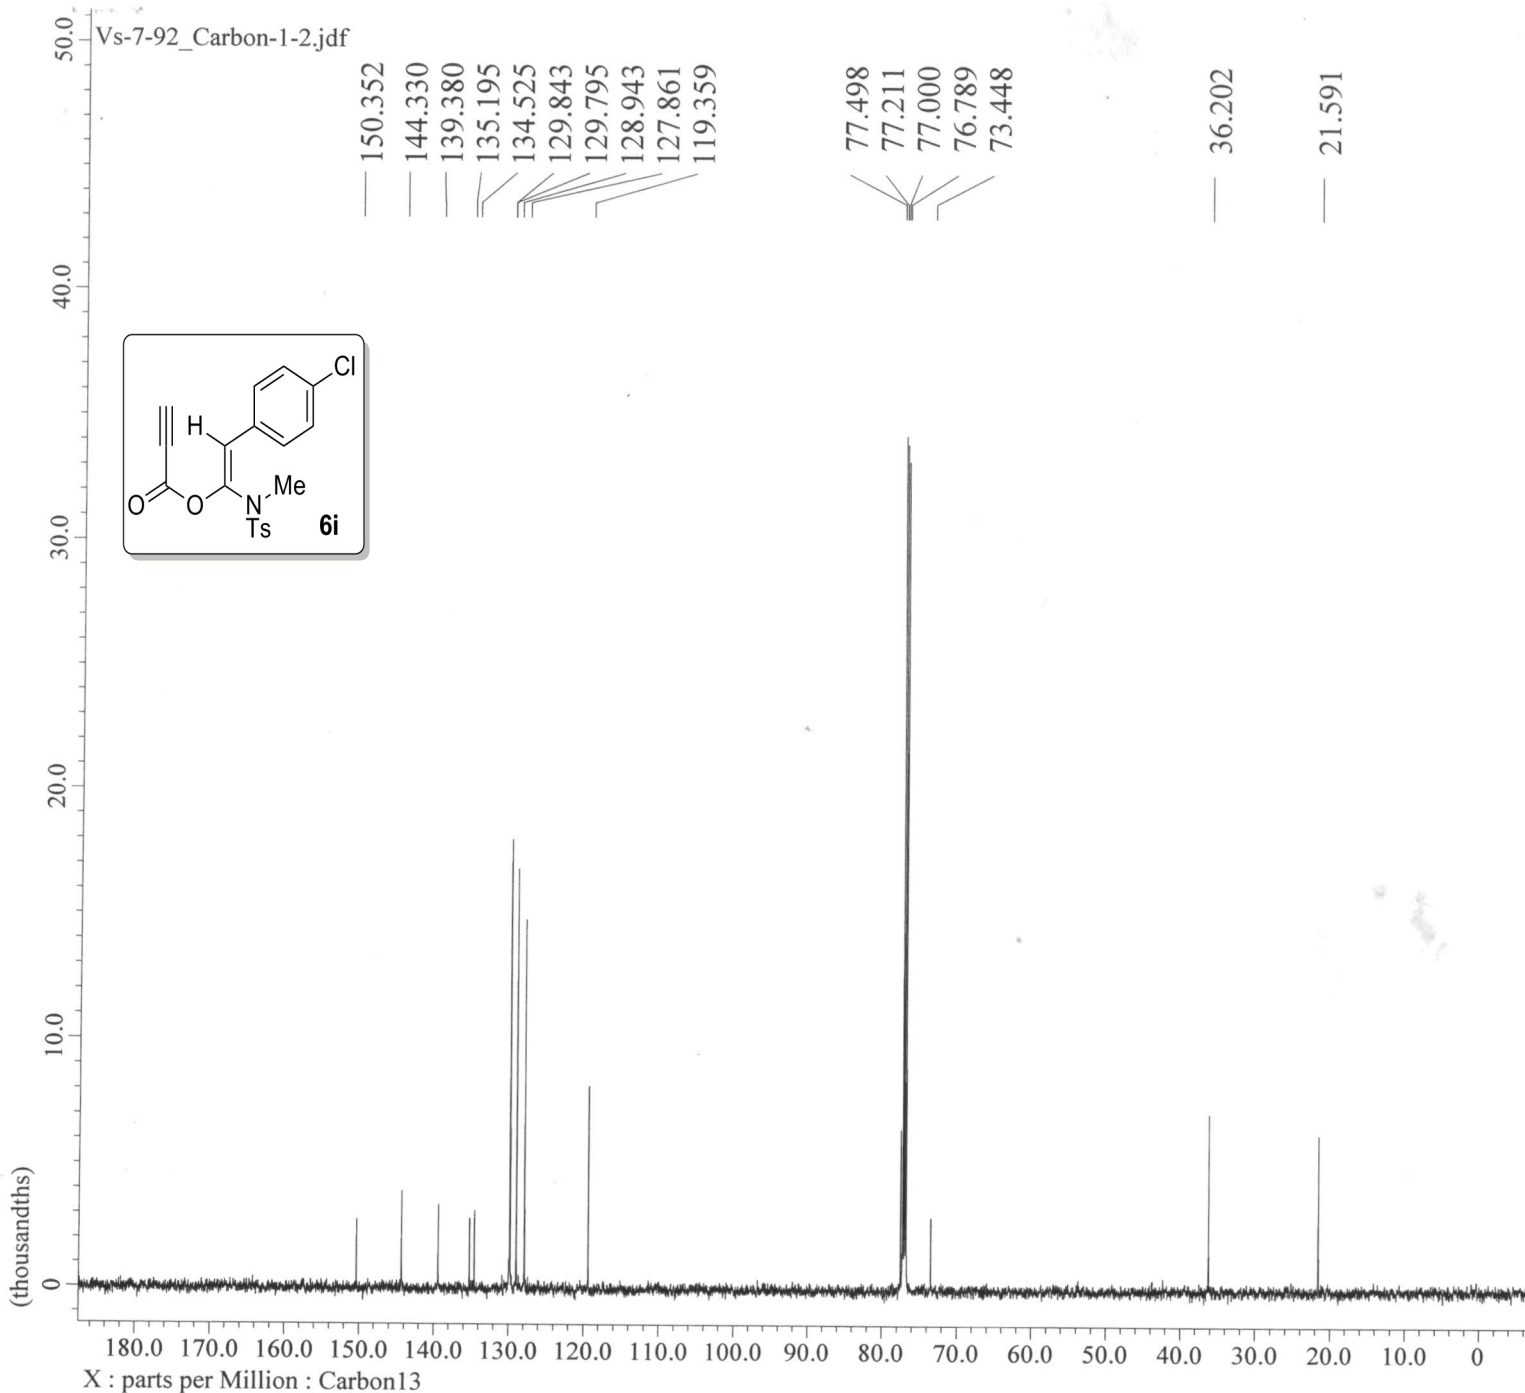

|                          |                      |
|--------------------------|----------------------|
| Filename                 | = Vs-7-92_Carbon-1-2 |
| Author                   | = delta              |
| Experiment               | = carbon auto. jxp   |
| Sample_Id                | = Vs-7-92            |
| Solvent                  | = CHLOROFORM-D       |
| Actual_Start_Time        | = 23-FEB-2021 16:43: |
| Revision_Time            | = 2-MAR-2021 22:22:  |
| Comment                  | = single pulse decou |
| Data_Format              | = 1D COMPLEX         |
| Dim_Size                 | = 26214              |
| X_Domain                 | = Carbon13           |
| Dim_Title                | = Carbon13           |
| Dim_Units                | = [ppm]              |
| Dimensions               | = X                  |
| Site                     | = ACRHEM_UOH         |
| Spectrometer             | = JNM-ECZ600R/M1     |
| Field_Strength           | = 14.09636928[T] (60 |
| X_Acq_Duration           | = 0.34603008[s]      |
| X_Domain                 | = Carbon13           |
| X_Freq                   | = 150.91343039[MHz]  |
| X_Offset                 | = 100[ppm]           |
| X_Points                 | = 16384              |
| X_Prescans               | = 4                  |
| X_Resolution             | = 2.88992217[Hz]     |
| X_Sweep                  | = 47.34848485[kHz]   |
| X_Sweep_Clipped          | = 37.87878788[kHz]   |
| Irr_Domain               | = Proton             |
| Irr_Freq                 | = 600.1723046[MHz]   |
| Irr_Offset               | = 5[ppm]             |
| Blanking                 | = 2[us]              |
| Clipped                  | = FALSE              |
| Scans                    | = 253                |
| Total_Scans              | = 253                |
| Relaxation_Delay         | = 2[s]               |
| Recvr_Gain               | = 56                 |
| Temp_Get                 | = 19.7[dC]           |
| X_90_Width               | = 11[us]             |
| X_Acq_Time               | = 0.34603008[s]      |
| X_Angle                  | = 30[deg]            |
| X_Atn                    | = 10.3[dB]           |
| X_Pulse                  | = 3.66666667[us]     |
| Irr_Atn_Dec              | = 33.452[dB]         |
| Irr_Atn_Dec_Calc         | = 33.452[dB]         |
| Irr_Atn_Dec_Default_Calc | = 33.452[dB]         |
| Irr_Atn_Noise            | = 33.452[dB]         |
| Irr_Dec_Bandwidth_Hz     | = 7.23684211[kHz]    |
| Irr_Dec_Bandwidth_Ppm    | = 12.05794078[ppm]   |
| Irr_Dec_Freq             | = 600.1723046[MHz]   |
| Irr_Dec_Merit_Factor     | = 2.2                |
| Irr_Decoupling           | = TRUE               |
| Irr_Noise                | = TRUE               |
| Irr_Noise                | = WALTZ              |
| Irr_Offset_Default       | = 5[ppm]             |
| Irr_Pwidth               | = 76[us]             |
| Irr_Pwidth_Default       | = 76[us]             |
| Irr_Pwidth_Default_Calc  | = 76[us]             |
| Irr_Pwidth_Temp1         | = 76[us]             |
| Irr_Wurst                | = FALSE              |
| Decimation_Rate          | = 0                  |
| Experiment_Path          | = c:\Program Files\J |
| Initial_Wait             | = 1[s]               |
| Noe_Time                 | = 2[s]               |
| Noe_Time_Flag            | = FALSE              |
| Relaxation_Delay_Calc    | = 0[s]               |
| Relaxation_Delay_Temp    | = 2[s]               |

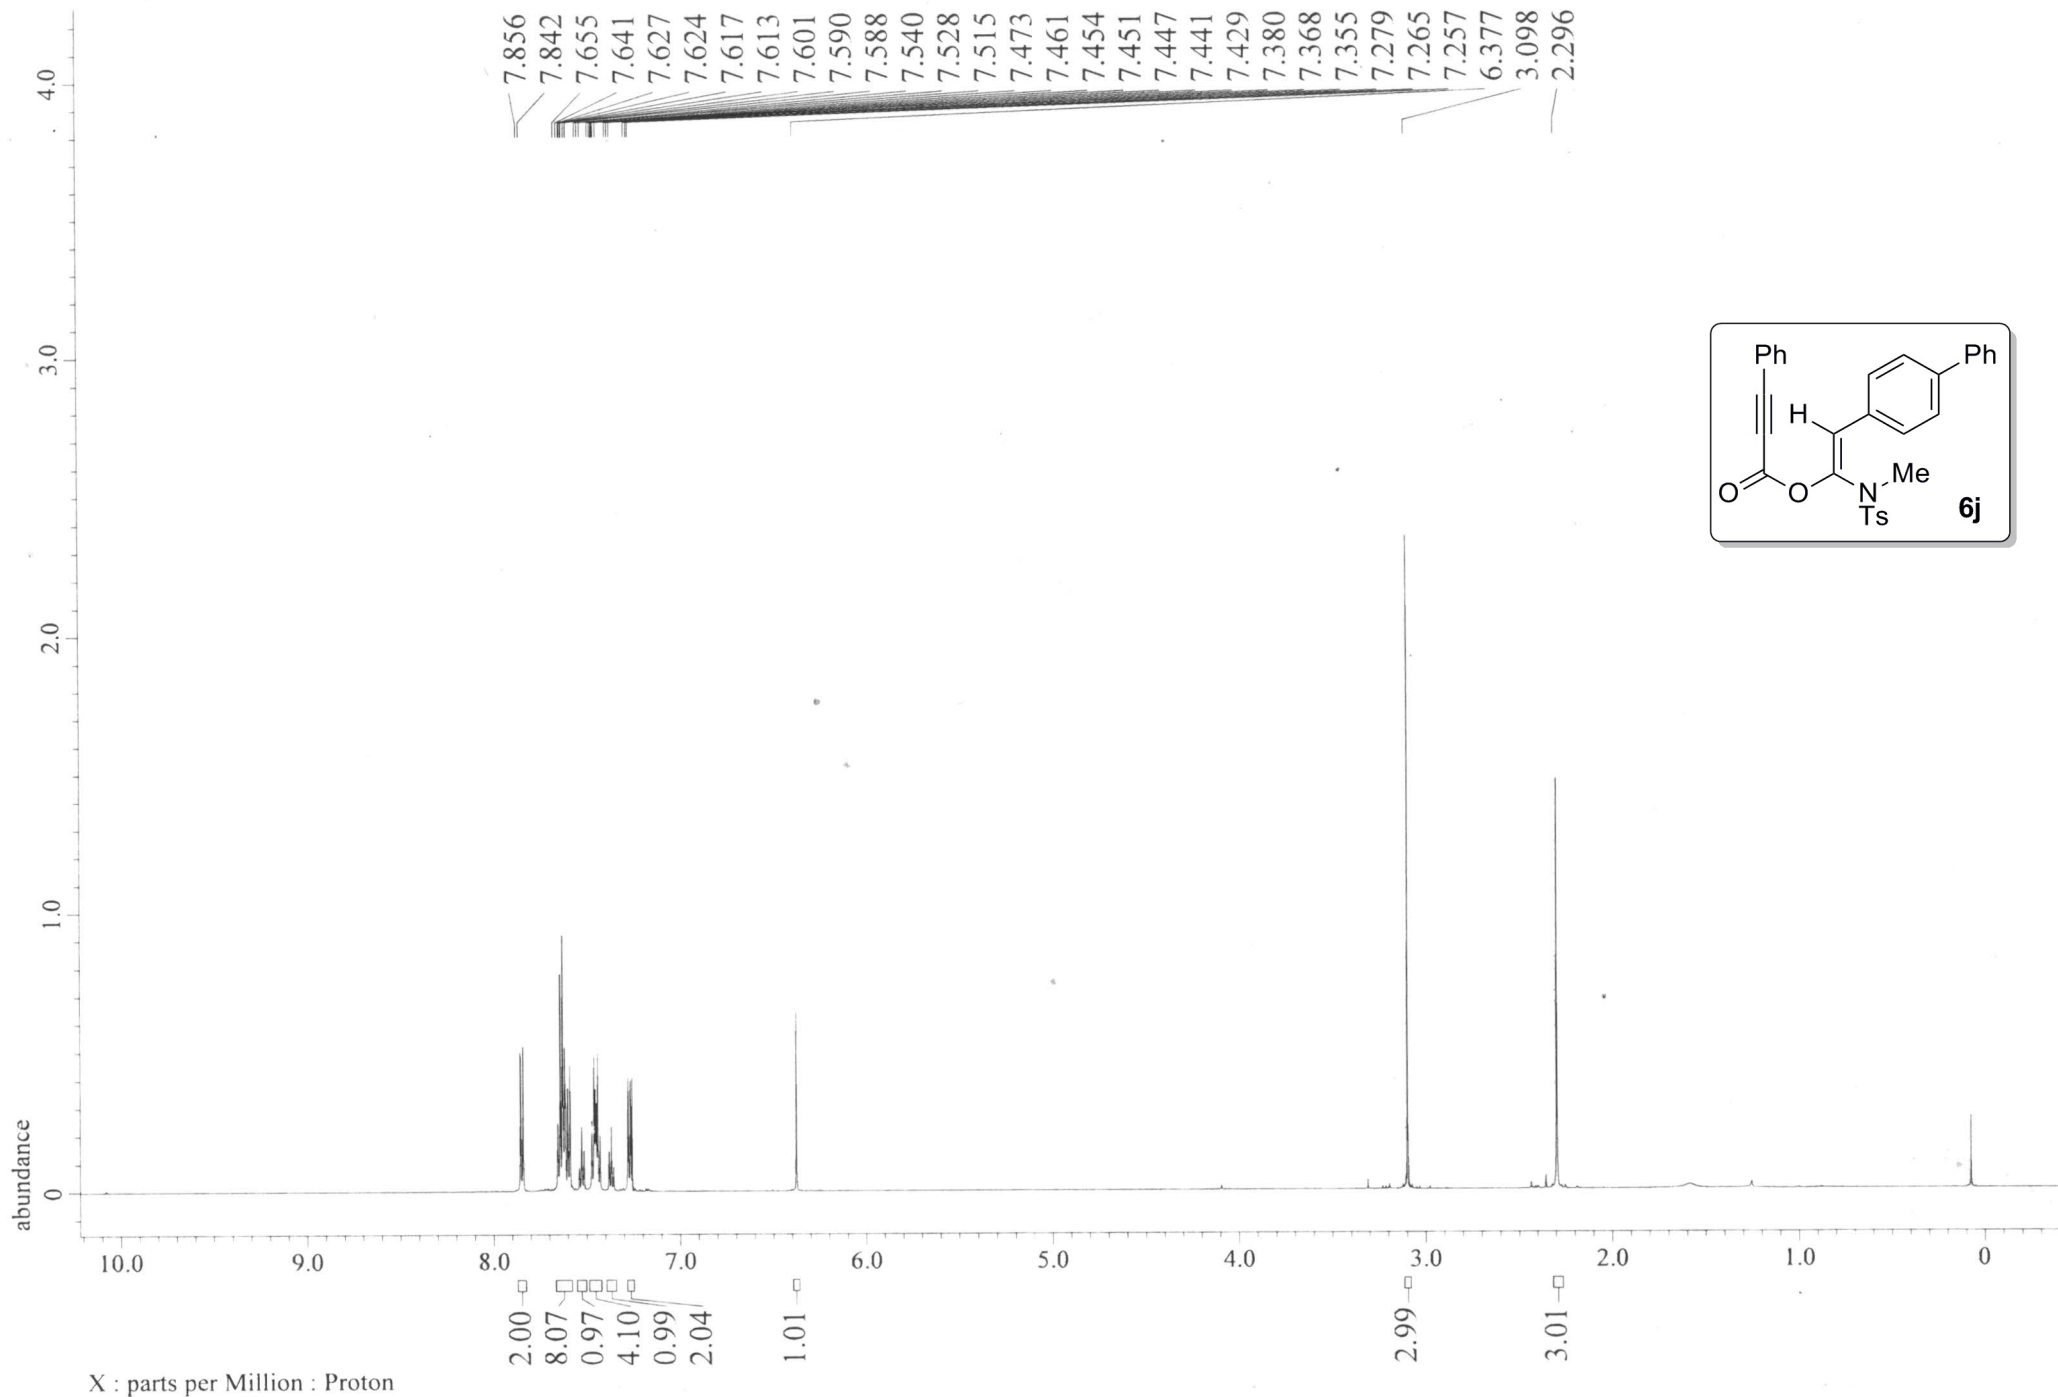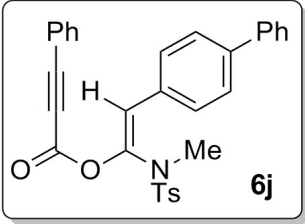

X : parts per Million : Proton

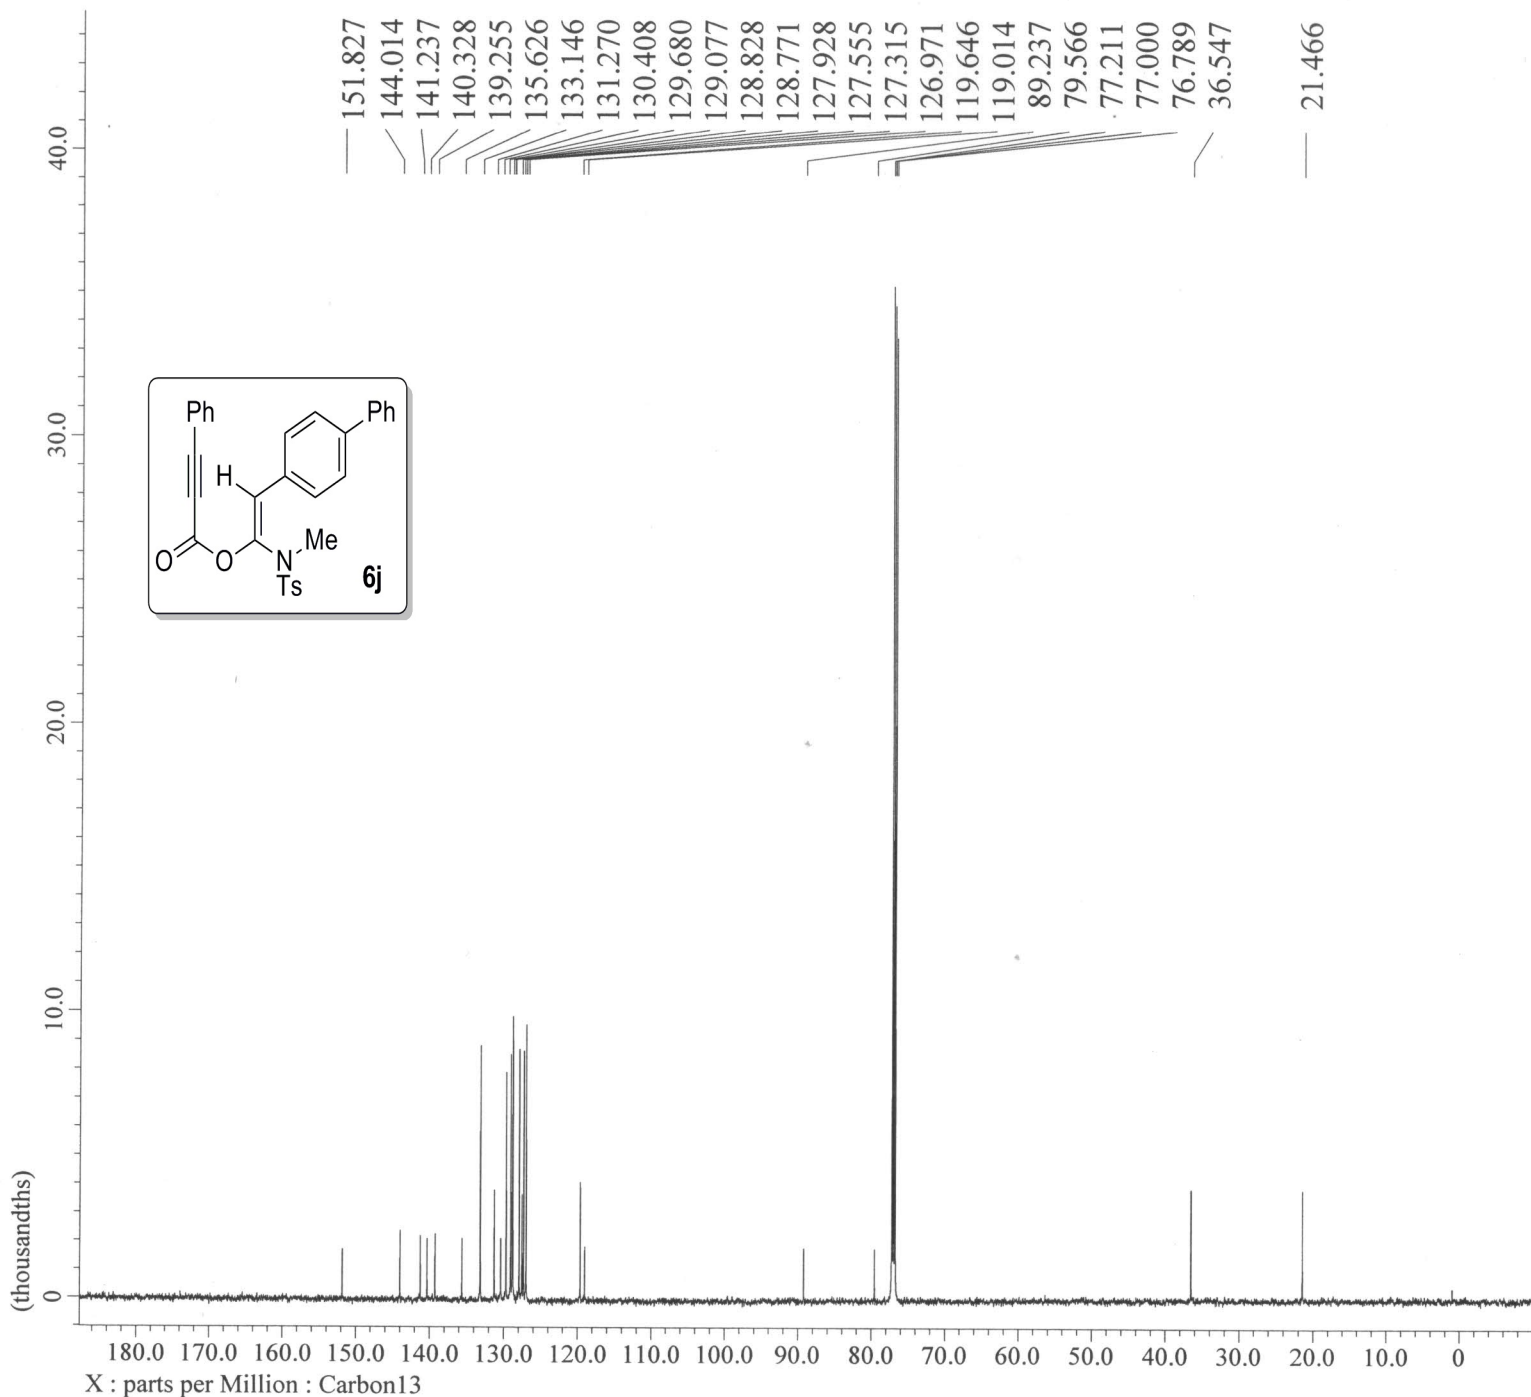

|                          |                      |
|--------------------------|----------------------|
| Filename                 | = Vs-7-93_Carbon-1-2 |
| Author                   | = delta              |
| Experiment               | = carbon auto.jxp    |
| Sample Id                | = Vs-7-93            |
| Solvent                  | = CHLOROFORM-D       |
| Actual Start Time        | = 12-FEB-2021 15:56: |
| Revision_Time            | = 13-FEB-2021 13:10: |
| Comment                  | = single pulse decou |
| Data Format              | = 1D COMPLEX         |
| Dim Size                 | = 26214              |
| X_Domain                 | = Carbon13           |
| Dim Title                | = Carbon13           |
| Dim Units                | = [ppm]              |
| Dimensions               | = X                  |
| Site                     | = ACRHEM_UOH         |
| Spectrometer             | = JNM-ECZ600R/M1     |
| Field Strength           | = 14.09636928[T] (60 |
| X_Acq_Duration           | = 0.34603008[s]      |
| X_Domain                 | = Carbon13           |
| X_Freq                   | = 150.91343039[MHz]  |
| X_Offset                 | = 100[ppm]           |
| X_Points                 | = 16384              |
| X_Prescans               | = 4                  |
| X_Resolution             | = 2.88992217[Hz]     |
| X_Sweep                  | = 47.34848485[kHz]   |
| X_Sweep_Clipped          | = 37.87878788[kHz]   |
| Irr_Domain               | = Proton             |
| Irr_Freq                 | = 600.1723046[MHz]   |
| Irr_Offset               | = 5[ppm]             |
| Blanking                 | = 2[us]              |
| Clipped                  | = FALSE              |
| Scans                    | = 1024               |
| Total_Scans              | = 1024               |
| Relaxation_Delay         | = 2[s]               |
| Recvr_Gain               | = 56                 |
| Temp_Get                 | = 19.1[dC]           |
| X_90_Width               | = 11[us]             |
| X_Acq_Time               | = 0.34603008[s]      |
| X_Angle                  | = 30[deg]            |
| X_Atn                    | = 10.3[dB]           |
| X_Pulse                  | = 3.66666667[us]     |
| Irr_Atn_Dec              | = 33.452[dB]         |
| Irr_Atn_Dec_Calc         | = 33.452[dB]         |
| Irr_Atn_Dec_Default_Calc | = 33.452[dB]         |
| Irr_Atn_No               | = 33.452[dB]         |
| Irr_Dec_Bandwidth_Hz     | = 7.23684211[kHz]    |
| Irr_Dec_Bandwidth_Ppm    | = 12.05794078[ppm]   |
| Irr_Dec_Freq             | = 600.1723046[MHz]   |
| Irr_Dec_Merit_Factor     | = 2.2                |
| Irr_Decoupling           | = TRUE               |
| Irr_No                   | = TRUE               |
| Irr_Noise                | = WALTZ              |
| Irr_Offset_Default       | = 5[ppm]             |
| Irr_Pwidth               | = 76[us]             |
| Irr_Pwidth_Default       | = 76[us]             |
| Irr_Pwidth_Default_Calc  | = 76[us]             |
| Irr_Pwidth_Temp1         | = 76[us]             |
| Irr_Wurst                | = FALSE              |
| Decimation_Rate          | = 0                  |
| Experiment_Path          | = c:\Program Files\J |
| Initial_Wait             | = 1[s]               |
| Noe_Time                 | = 2[s]               |
| Noe_Time_Flag            | = FALSE              |
| Relaxation_Delay_Calc    | = 0[s]               |
| Relaxation_Delay_Temp    | = 2[s]               |

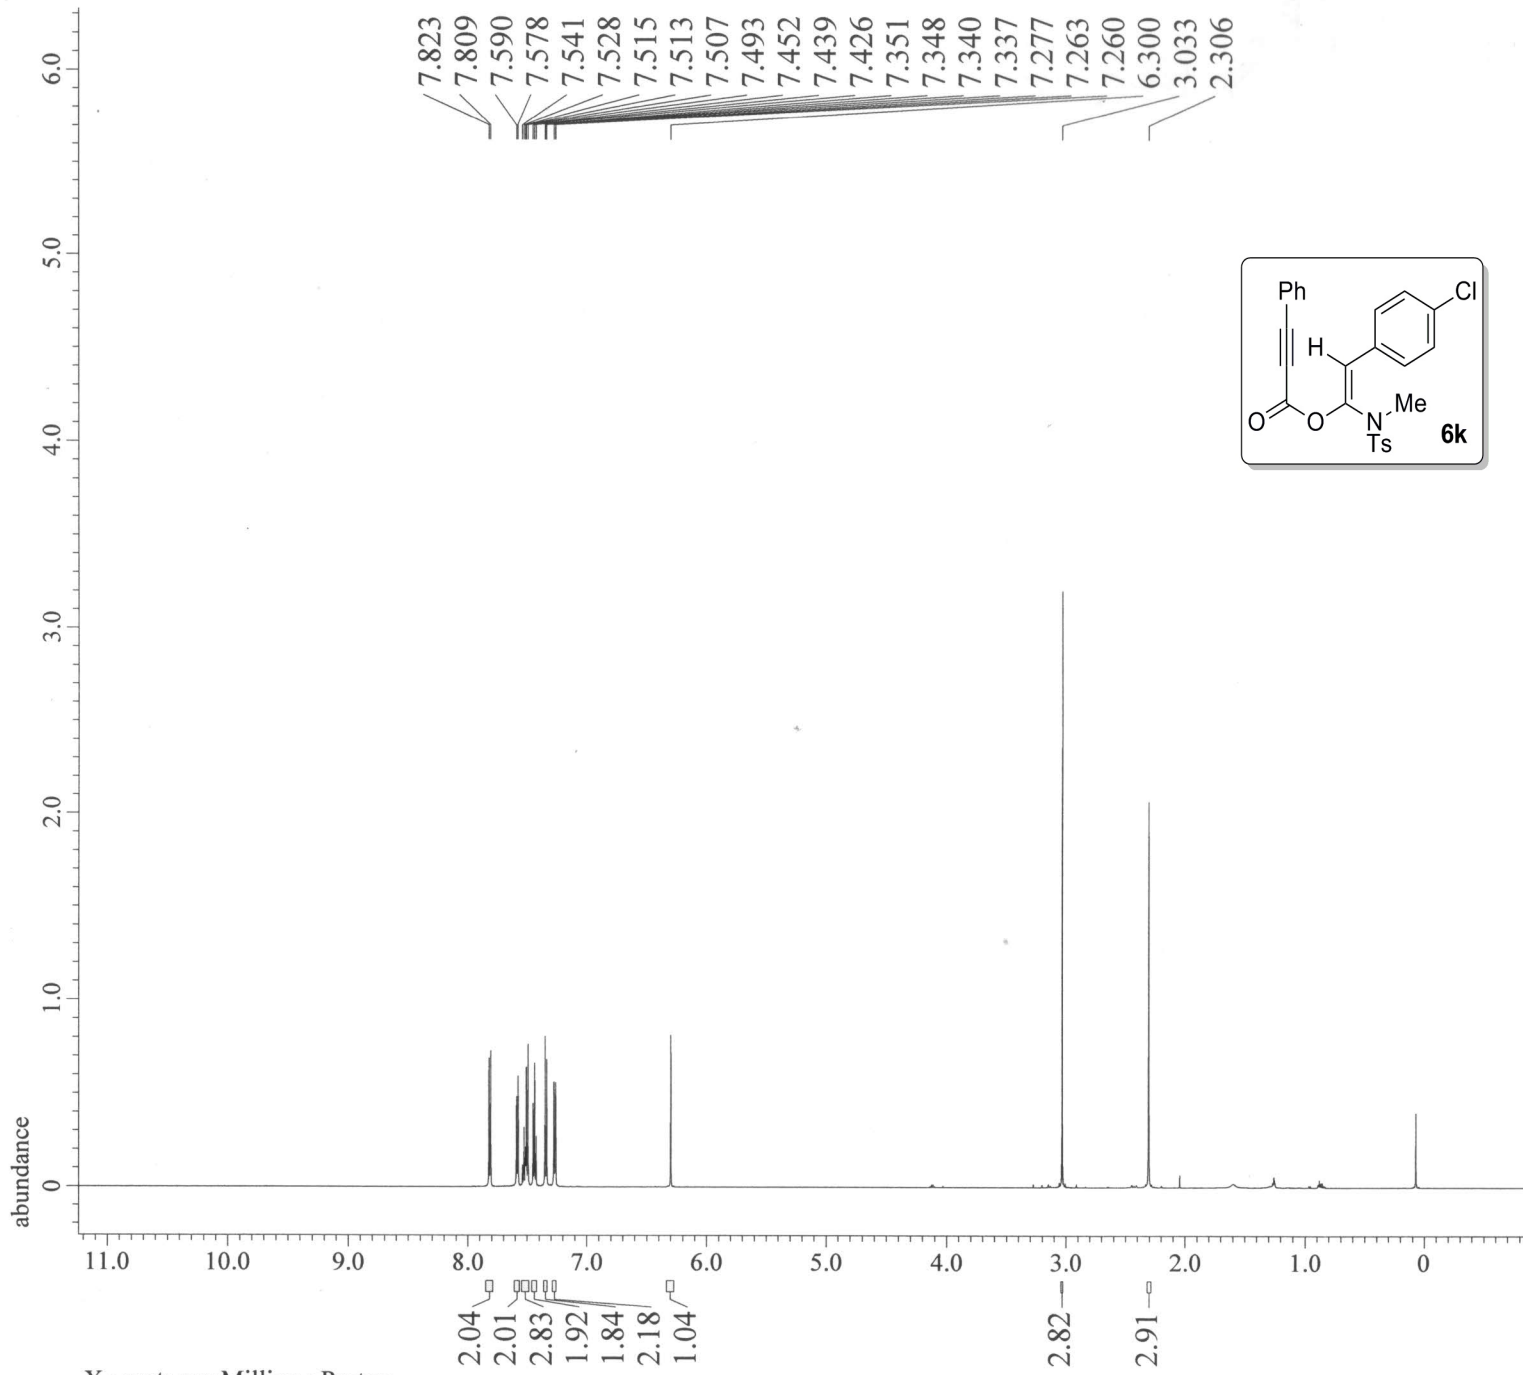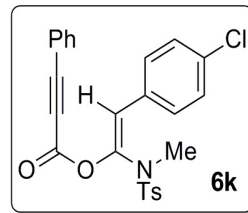

|                       |                         |
|-----------------------|-------------------------|
| Filename              | = Vs-7-92_1a_Proton-1-3 |
| Author                | = delta                 |
| Experiment            | = proton_auto.jxp       |
| Sample_Id             | = Vs-7-92/7a            |
| Solvent               | = CHLOROFORM-D          |
| Actual_Start_Time     | = 13-FEB-2021 12:34:10  |
| Revision_Time         | = 15-AUG-2021 15:03:08  |
| Comment               | = single_pulse          |
| Data_Format           | = 1D_COMPLEX            |
| Dim_Size              | = 52429                 |
| X_Domain              | = Proton                |
| Dim_Title             | = Proton                |
| Dim_Units             | = [ppm]                 |
| Dimensions            | = X                     |
| Site                  | = ACRHEM_UOH            |
| Spectrometer          | = JNM-ECZ600R/M1        |
| Field_Strength        | = 14.09636928[T] (600[M |
| X_Acq_Duration        | = 0.72876032[s]         |
| X_Domain              | = Proton                |
| X_Freq                | = 600.1723046[MHz]      |
| X_Offset              | = 5[ppm]                |
| X_Points              | = 16384                 |
| X_Prescans            | = 1                     |
| X_Resolution          | = 1.37219326[Hz]        |
| X_Sweep               | = 22.48201439[kHz]      |
| X_Sweep_Clippped      | = 17.98561151[kHz]      |
| Irr_Domain            | = Proton                |
| Irr_Freq              | = 600.1723046[MHz]      |
| Irr_Offset            | = 5[ppm]                |
| Tri_Domain            | = Proton                |
| Tri_Freq              | = 600.1723046[MHz]      |
| Tri_Offset            | = 5[ppm]                |
| Blanking              | = 2[us]                 |
| Clipped               | = FALSE                 |
| Scans                 | = 16                    |
| Total_Scans           | = 16                    |
| Relaxation_Delay      | = 5[s]                  |
| Recvr_Gain            | = 56                    |
| Temp_Get              | = 19.5[dC]              |
| X_90_Width            | = 6.89[us]              |
| X_Acq_Time            | = 0.72876032[s]         |
| X_Angle               | = 45[deg]               |
| X_Atn                 | = 12.6[dB]              |
| X_Pulse               | = 3.445[us]             |
| Irr_Mode              | = Off                   |
| Tri_Mode              | = Off                   |
| Dante_Loop            | = 500                   |
| Dante_Presat          | = FALSE                 |
| Decimation_Rate       | = 0                     |
| Experiment_Path       | = c:\Program Files\JEOL |
| Initial_Wait          | = 1[s]                  |
| Phase                 | = {0, 90, 270, 180, 180 |
| Presat_Time           | = 5[s]                  |
| Presat_Time_Flag      | = FALSE                 |
| Relaxation_Delay_Calc | = 0[s]                  |
| Relaxation_Delay_Temp | = 5[s]                  |
| Repetition_Time       | = 5.72876032[s]         |

X : parts per Million : Proton

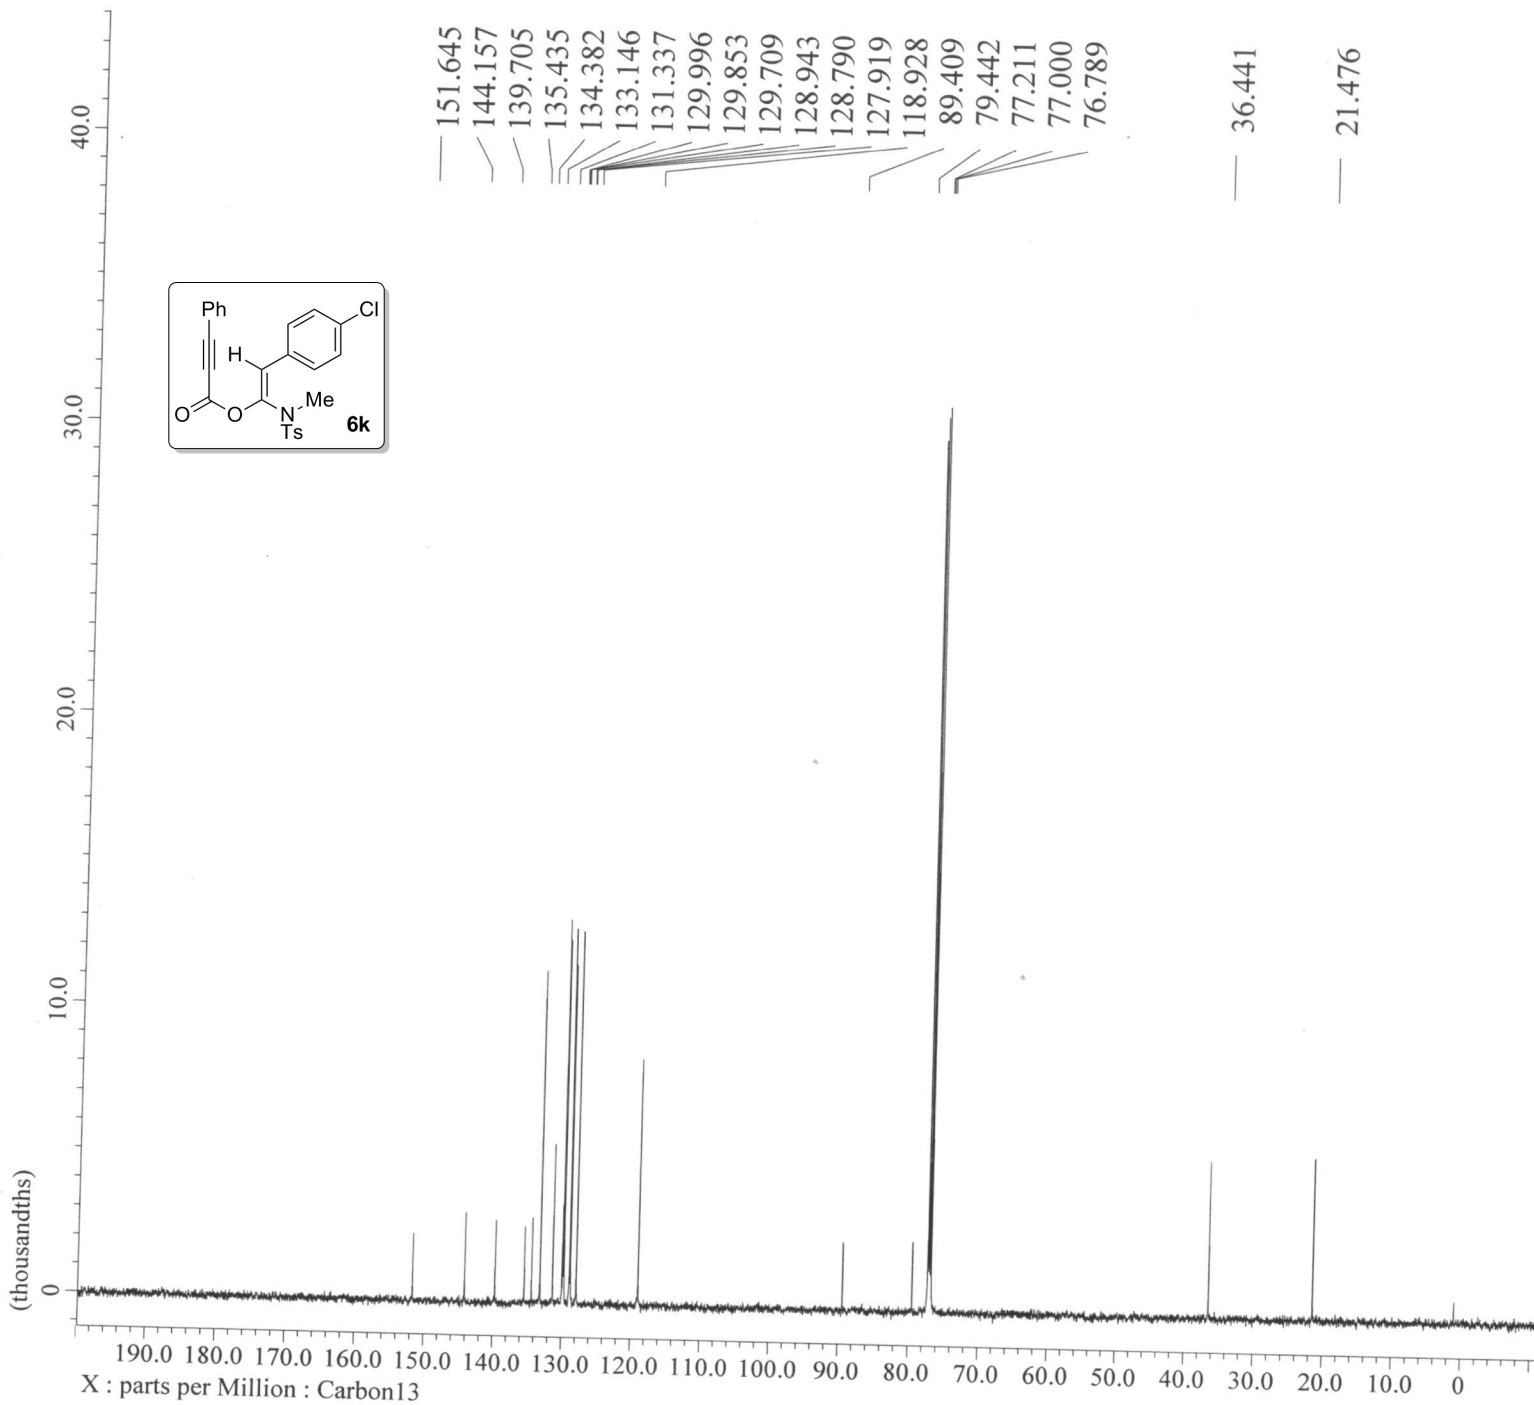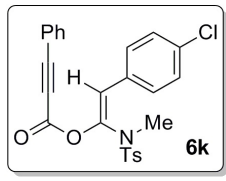

|                          |                      |
|--------------------------|----------------------|
| Filename                 | = Vs-7-92_1a_Carbon- |
| Author                   | = delta              |
| Experiment               | = carbon auto.jxp    |
| Sample_Id                | = Vs-7-92/7a         |
| Solvent                  | = CHLOROFORM-D       |
| Actual_Start_Time        | = 13-FEB-2021 12:36: |
| Revision_Time            | = 13-FEB-2021 13:21: |
| Comment                  | = single pulse decou |
| Data_Format              | = 1D COMPLEX         |
| Dim_Size                 | = 26214              |
| X_Domain                 | = Carbon13           |
| Dim_Title                | = Carbon13           |
| Dim_Units                | = [ppm]              |
| Dimensions               | = X                  |
| Site                     | = ACRHEM UOH         |
| Spectrometer             | = JNM-ECZ600R/M1     |
| Field_Strength           | = 14.09636928[T] (60 |
| X_Acq_Duration           | = 0.34603008[s]      |
| X_Domain                 | = Carbon13           |
| X_Freq                   | = 150.91343039[MHz]  |
| X_Offset                 | = 100[ppm]           |
| X_Points                 | = 16384              |
| X_Prescans               | = 4                  |
| X_Resolution             | = 2.88992217[Hz]     |
| X_Sweep                  | = 47.34848485[kHz]   |
| X_Sweep_Clipped          | = 37.87878788[kHz]   |
| Irr_Domain               | = Proton             |
| Irr_Freq                 | = 600.1723046[MHz]   |
| Irr_Offset               | = 5[ppm]             |
| Blanking                 | = 2[us]              |
| Clipped                  | = FALSE              |
| Scans                    | = 675                |
| Total_Scans              | = 675                |
| Relaxation_Delay         | = 2[s]               |
| Recvr_Gain               | = 56                 |
| Temp_Get                 | = 19.5[dC]           |
| X_90_Width               | = 11[us]             |
| X_Acq_Time               | = 0.34603008[s]      |
| X_Angle                  | = 30[deg]            |
| X_Atn                    | = 10.3[dB]           |
| X_Pulse                  | = 3.66666667[us]     |
| Irr_Atn_Dec              | = 33.452[dB]         |
| Irr_Atn_Dec_Calc         | = 33.452[dB]         |
| Irr_Atn_Dec_Default_Calc | = 33.452[dB]         |
| Irr_Atn_No               | = 33.452[dB]         |
| Irr_Dec_Bandwidth_Hz     | = 7.23684211[kHz]    |
| Irr_Dec_Bandwidth_Ppm    | = 12.05794078[ppm]   |
| Irr_Dec_Freq             | = 600.1723046[MHz]   |
| Irr_Dec_Merit_Factor     | = 2.2                |
| Irr_Decoupling           | = TRUE               |
| Irr_No                   | = TRUE               |
| Irr_Noise                | = WALTZ              |
| Irr_Offset_Default       | = 5[ppm]             |
| Irr_Pwidth               | = 76[us]             |
| Irr_Pwidth_Default       | = 76[us]             |
| Irr_Pwidth_Default_Calc  | = 76[us]             |
| Irr_Pwidth_Temp1         | = 76[us]             |
| Irr_Wurst                | = FALSE              |
| Decimation_Rate          | = 0                  |
| Experiment_Path          | = c:\Program Files\J |
| Initial_Wait             | = 1[s]               |
| Noe_Time                 | = 2[s]               |
| Noe_Time_Flag            | = FALSE              |
| Relaxation_Delay_Calc    | = 0[s]               |
| Relaxation_Delay_Temp    | = 2[s]               |

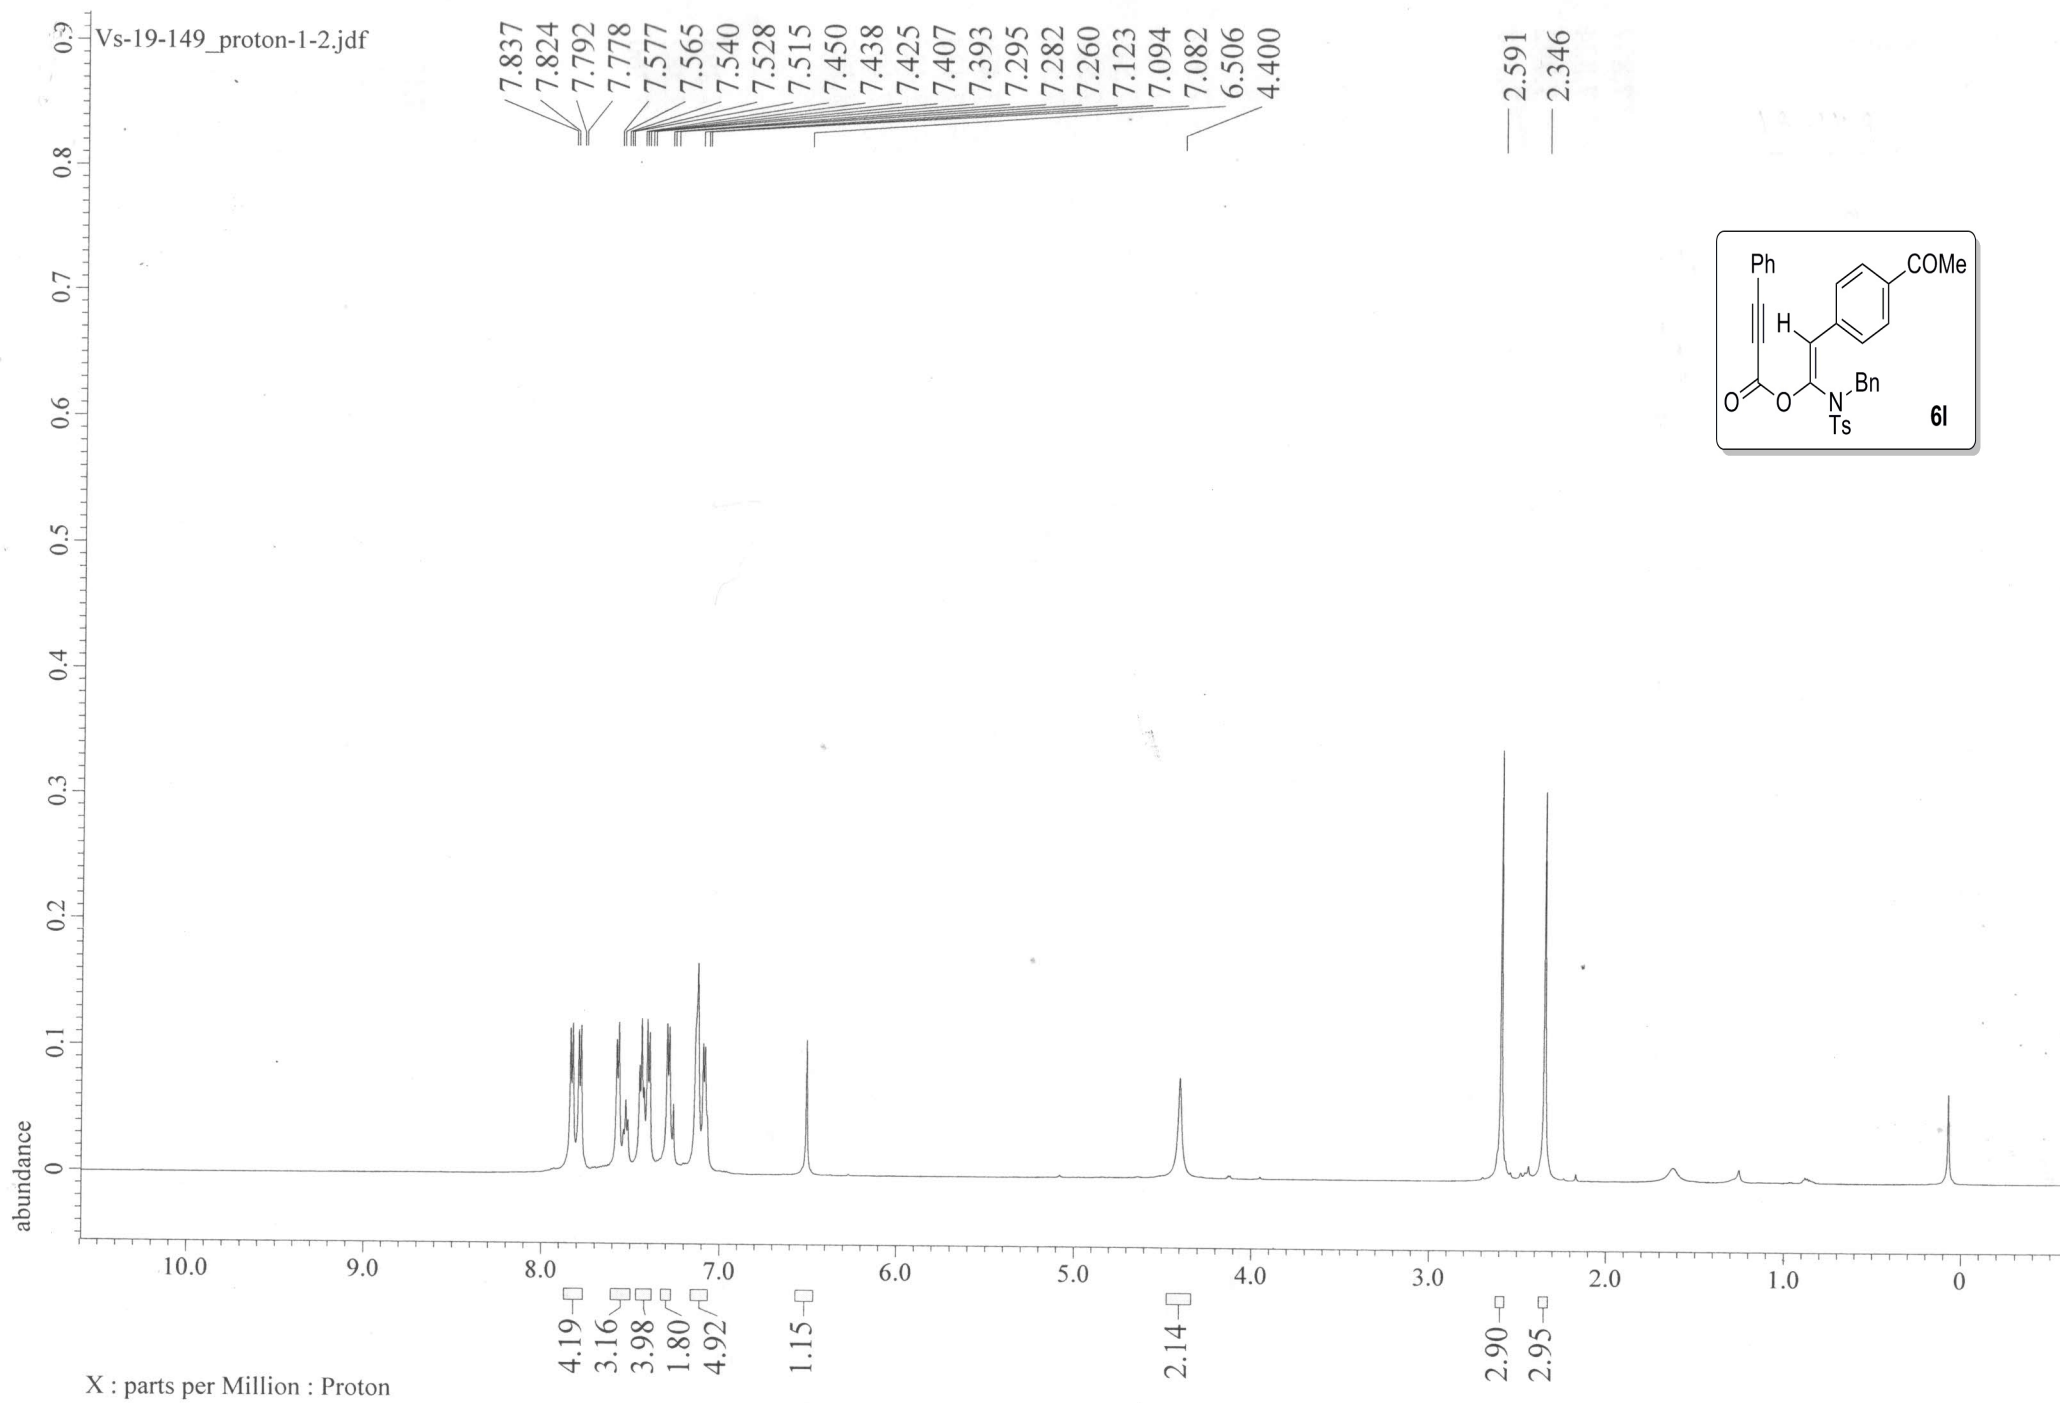

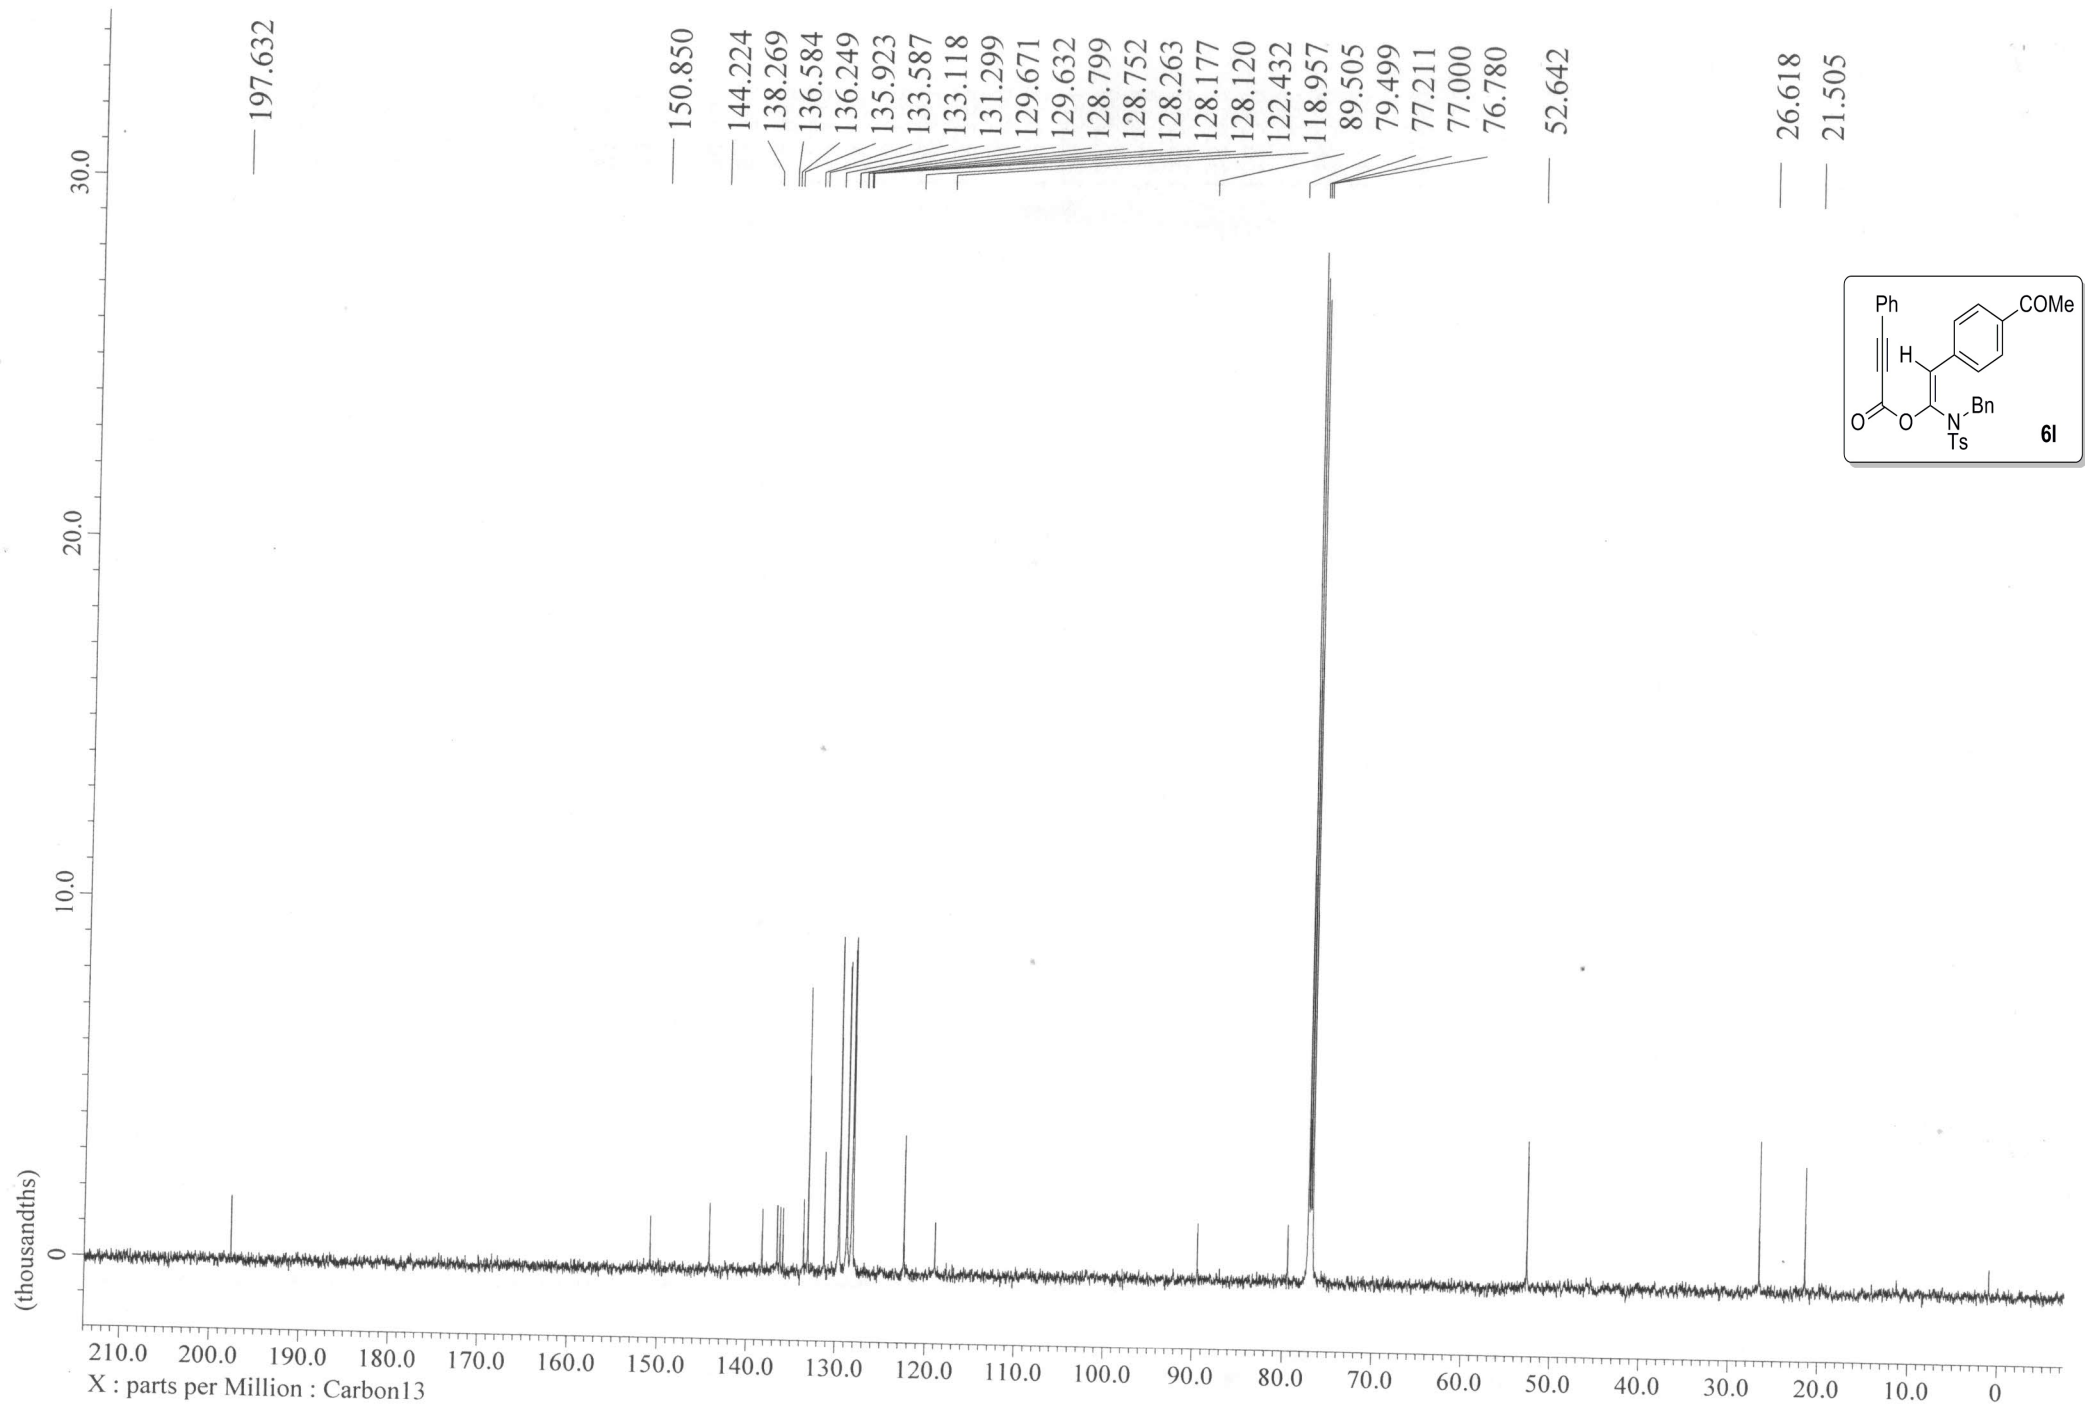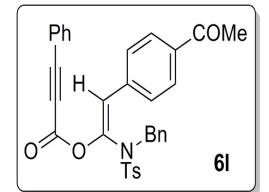

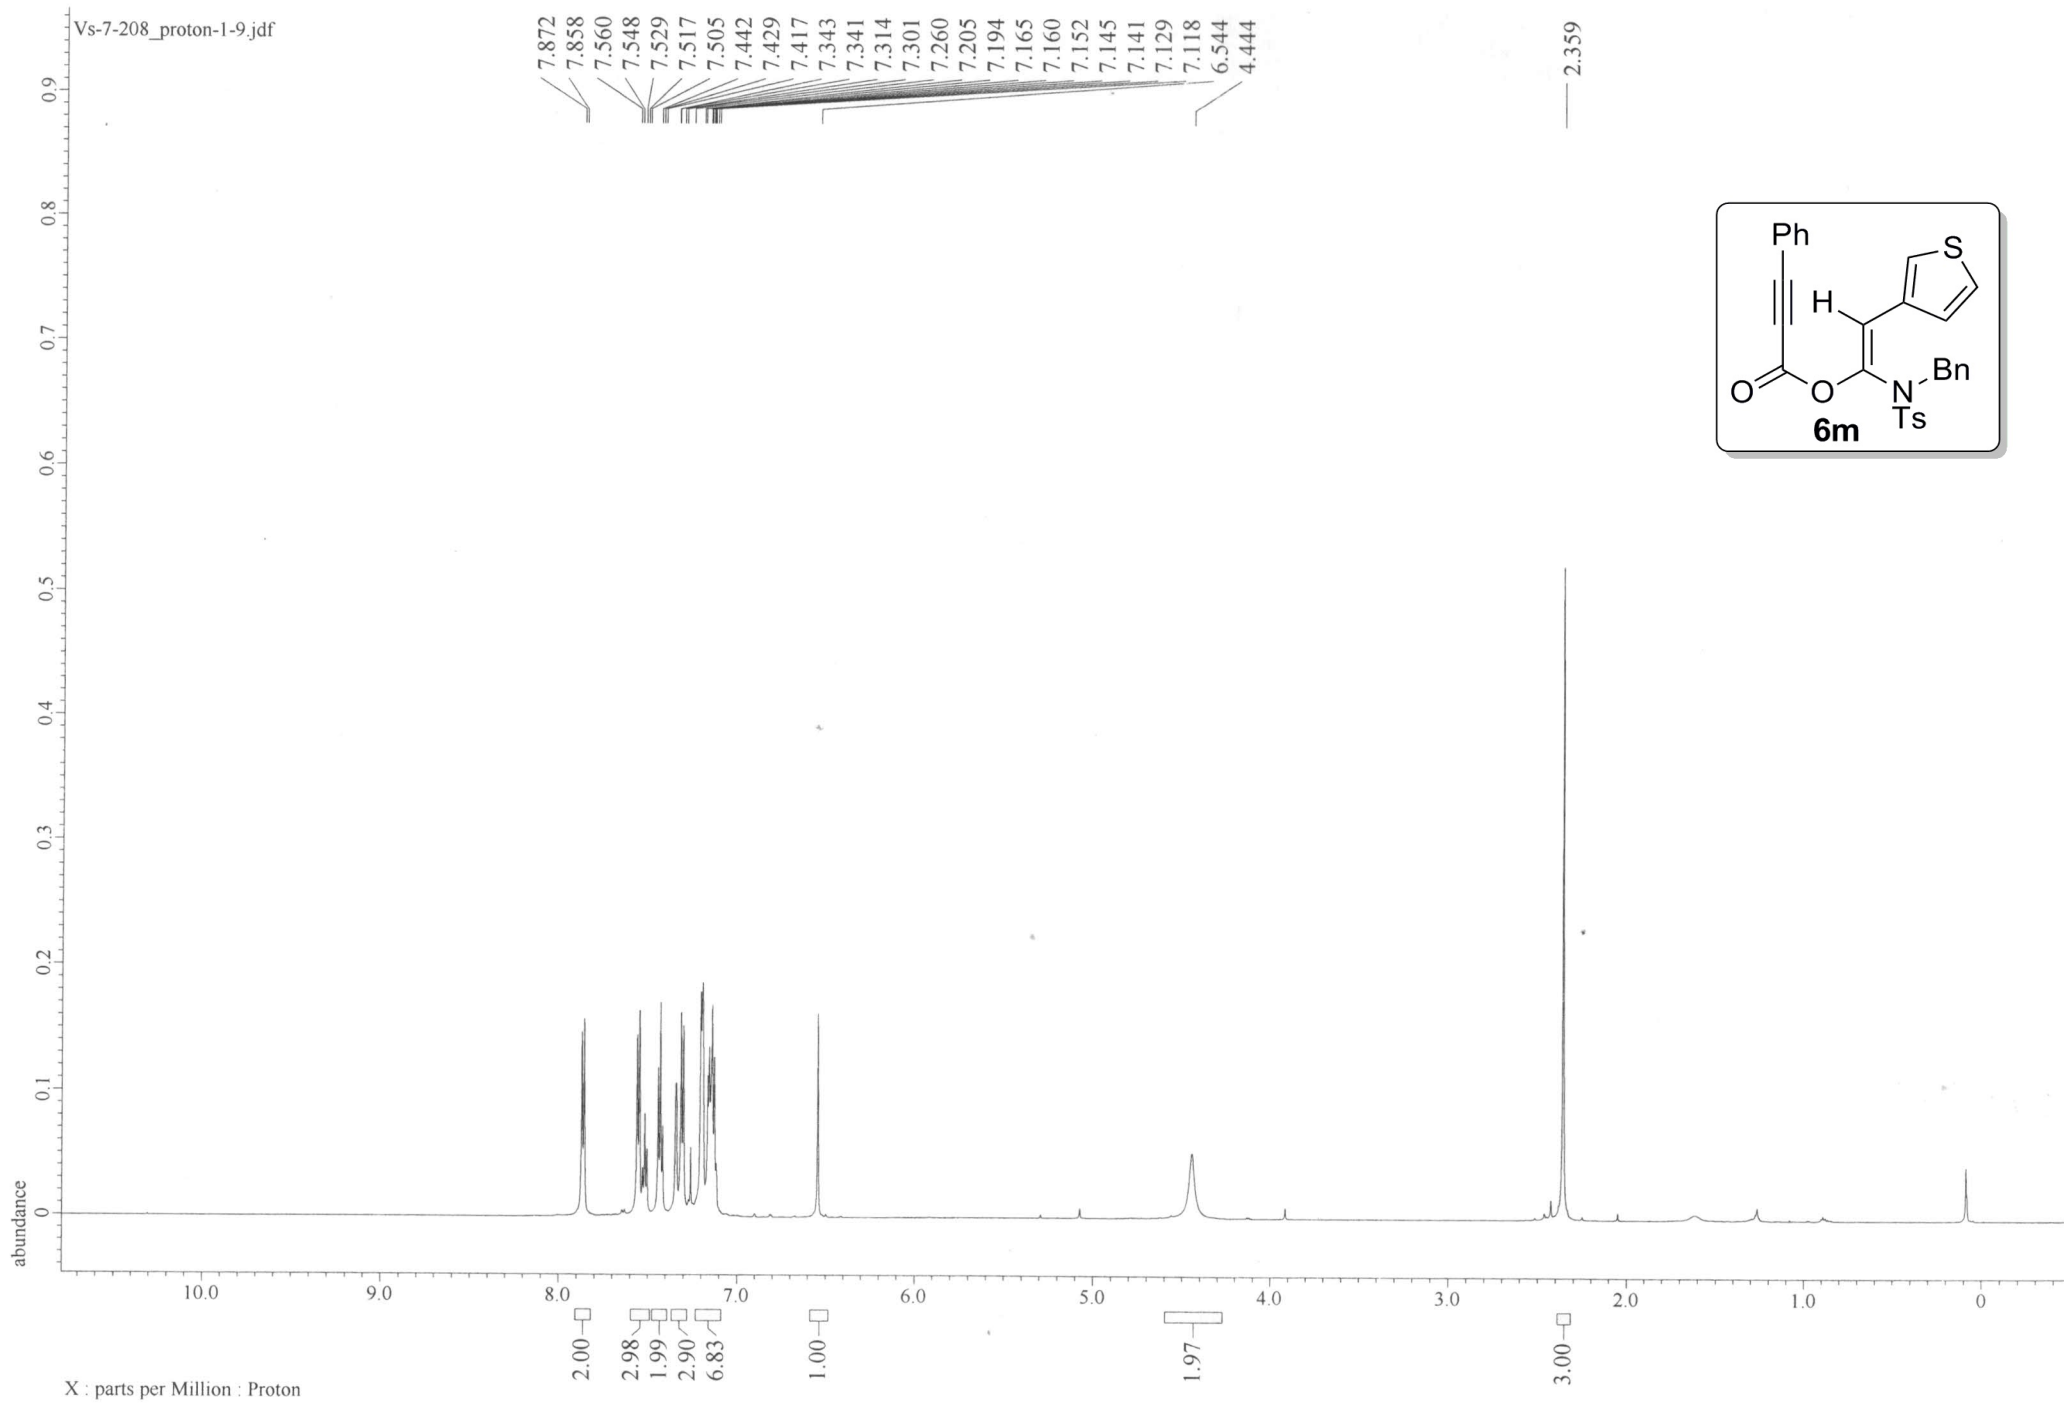



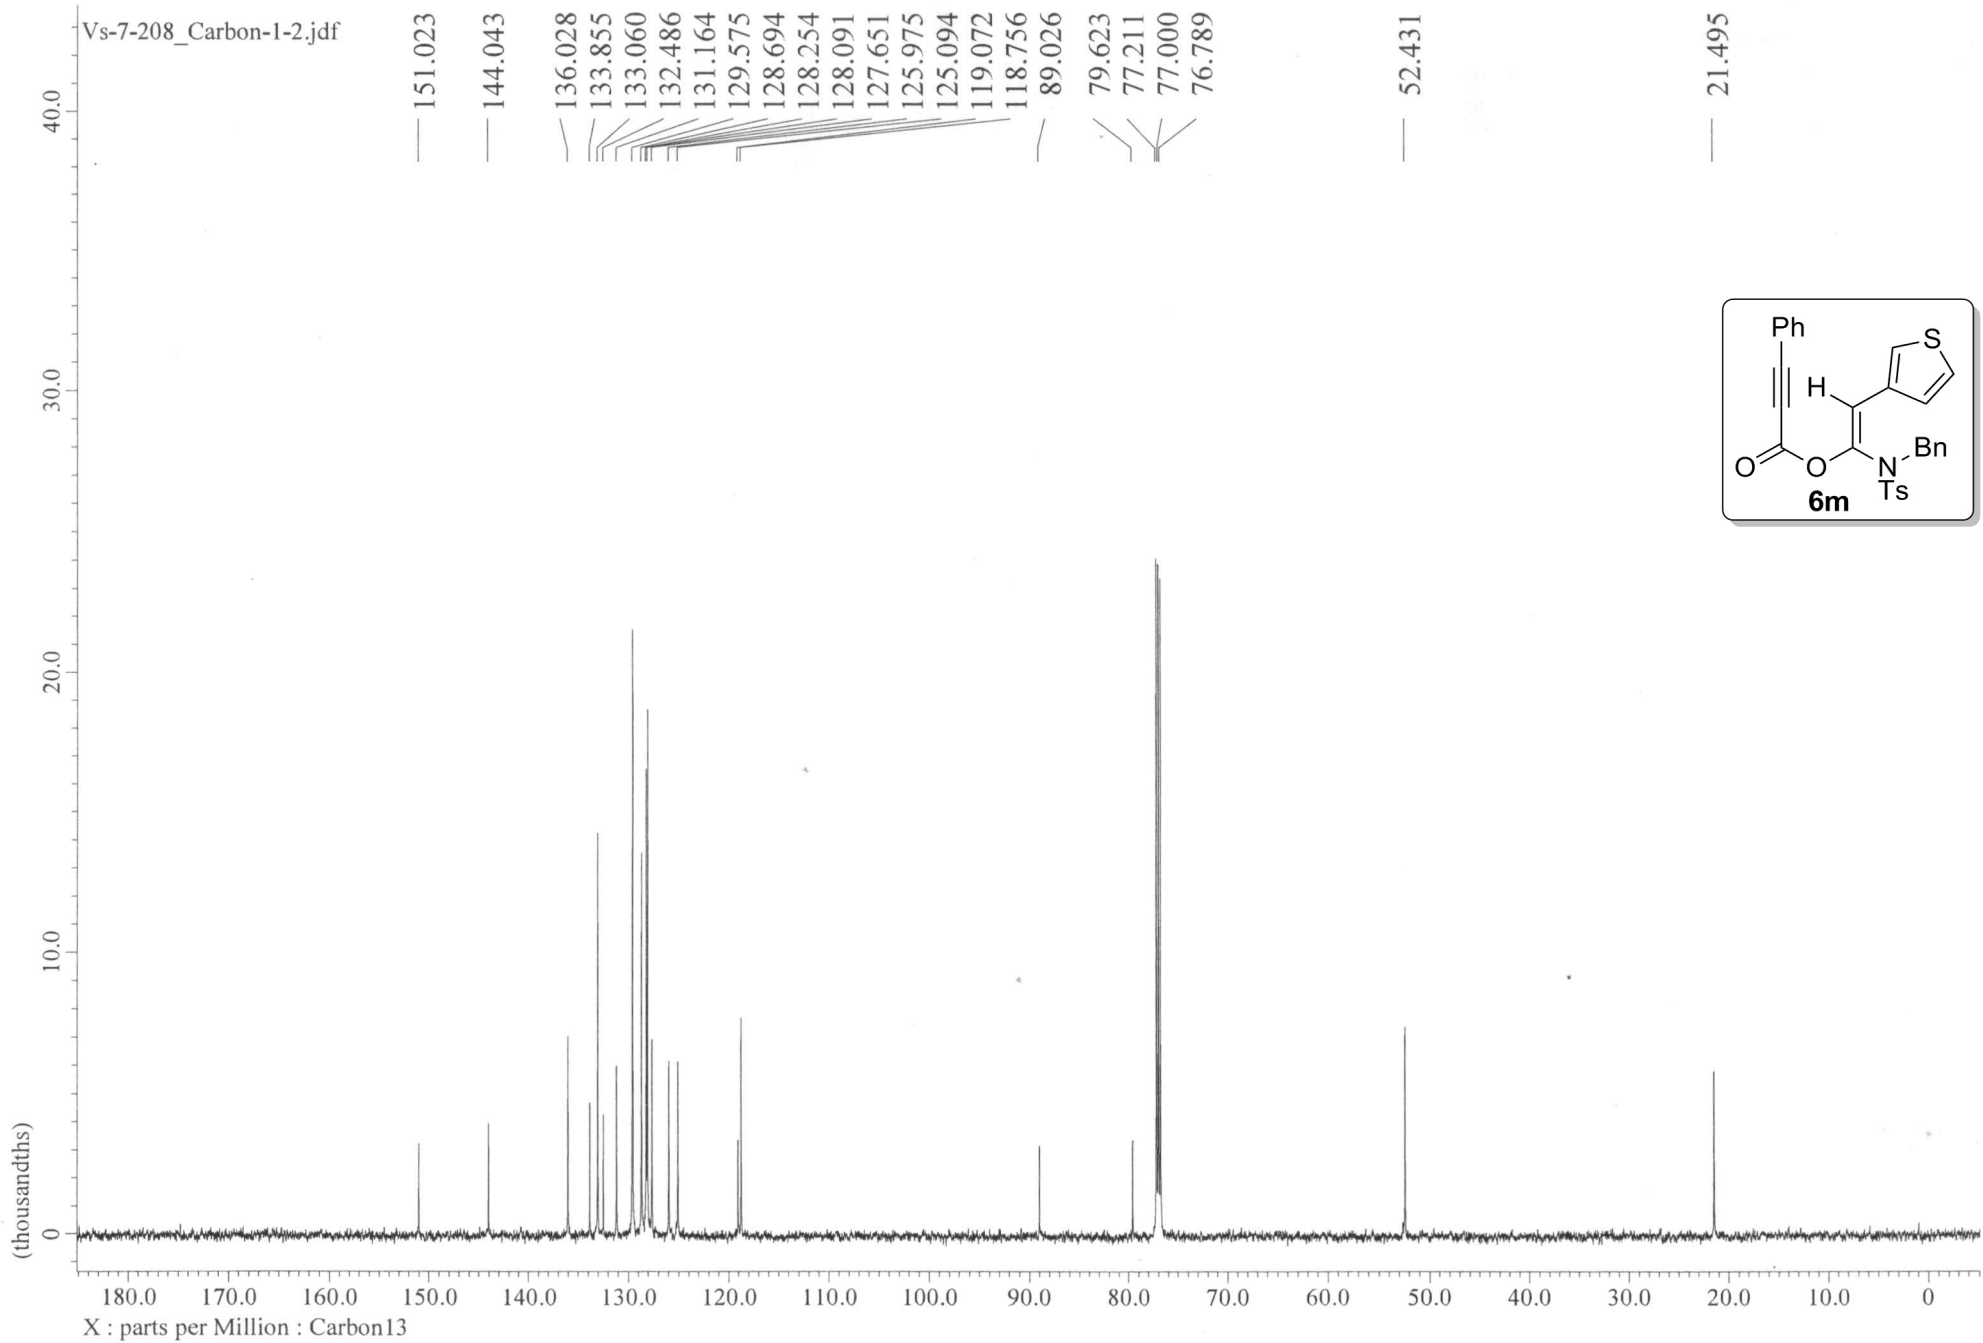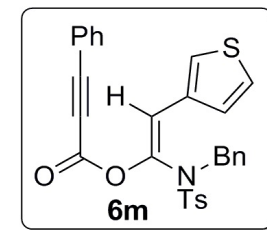

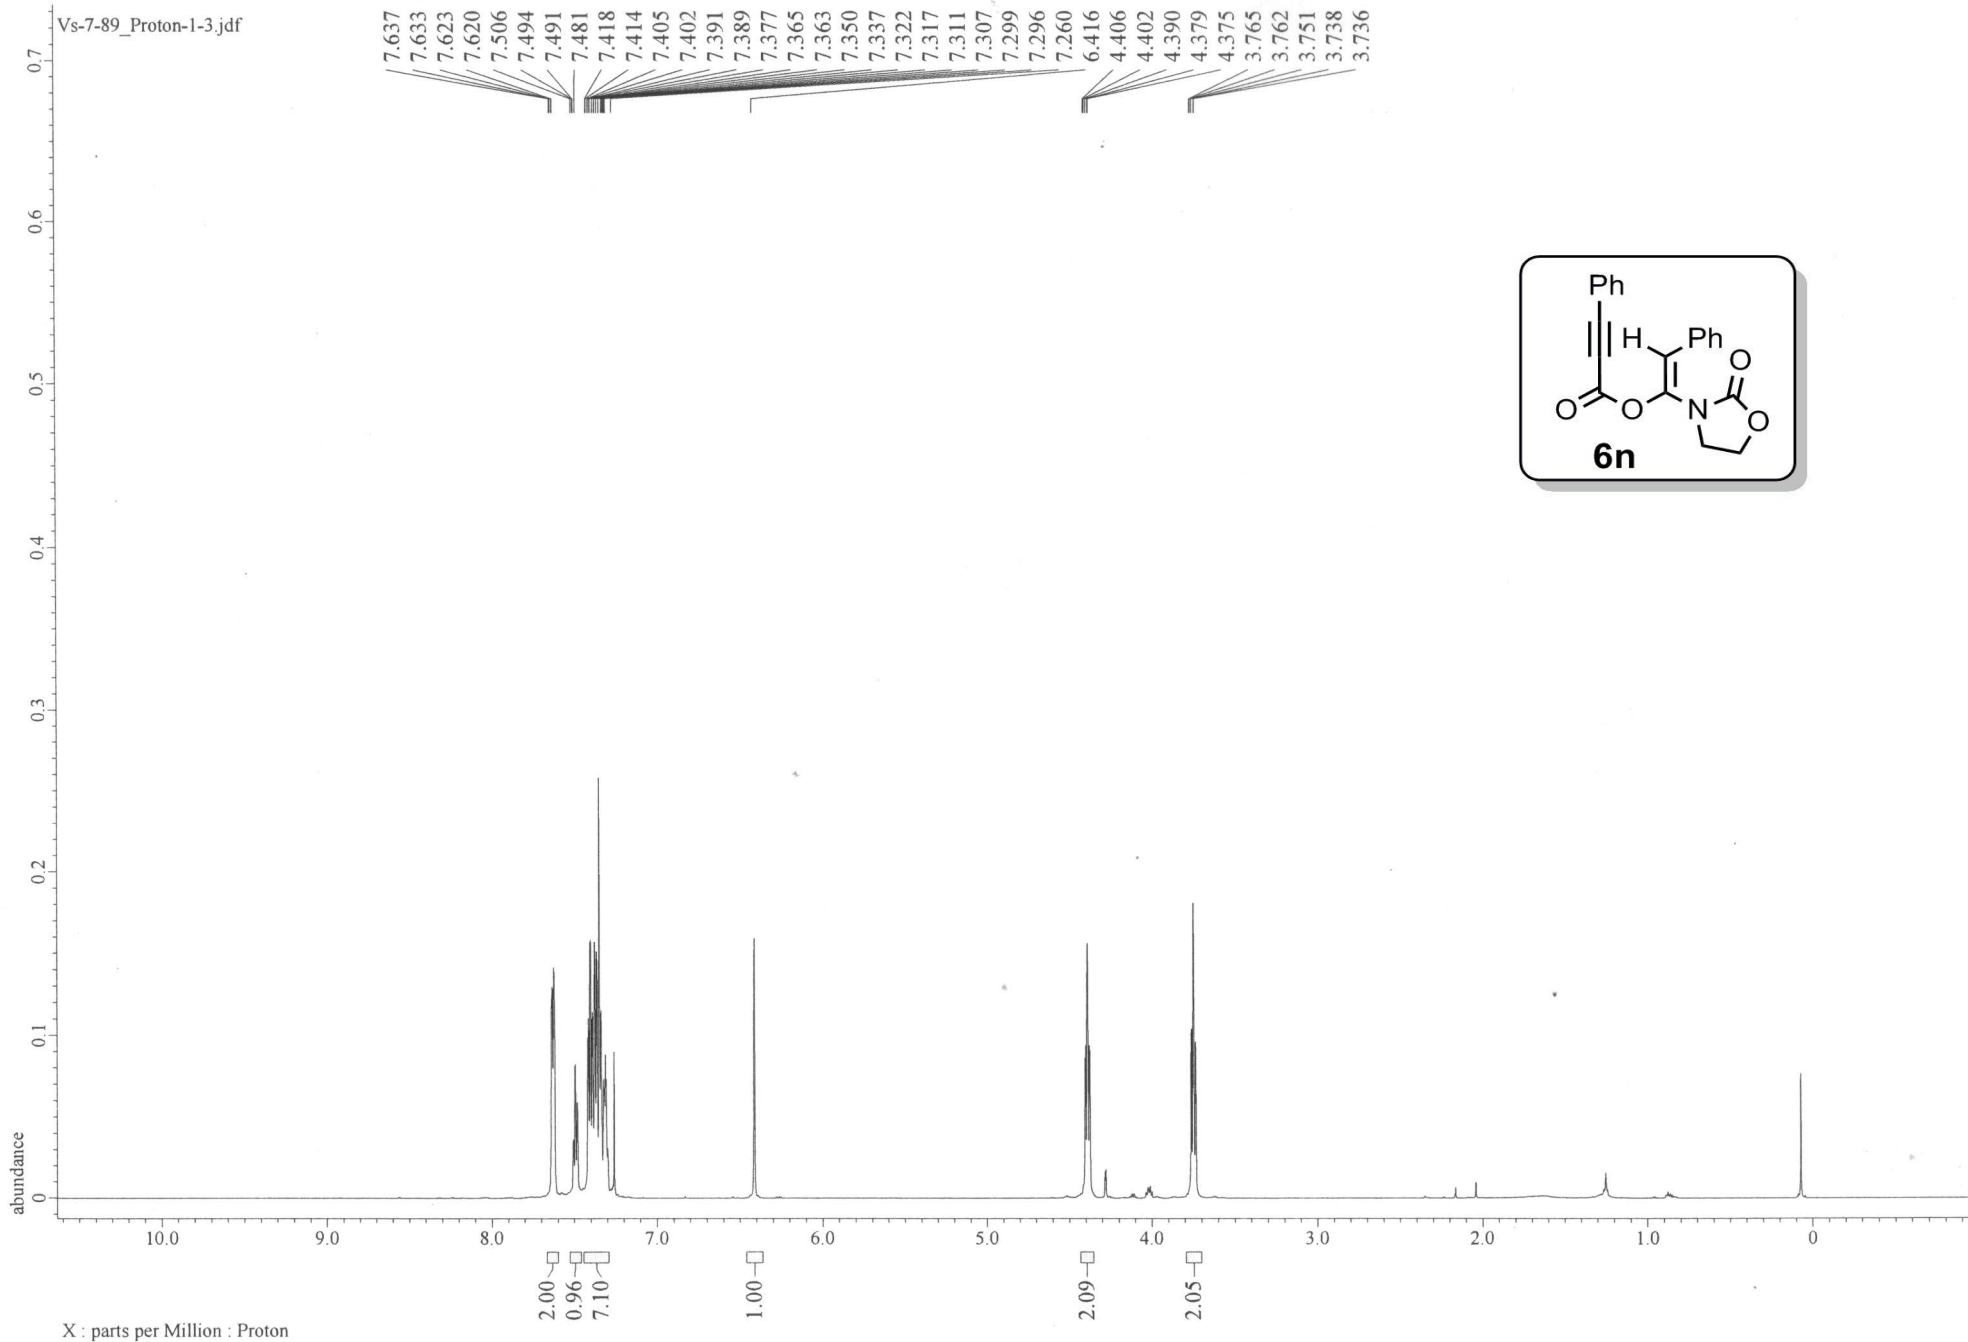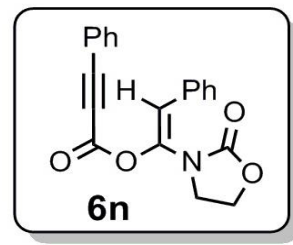

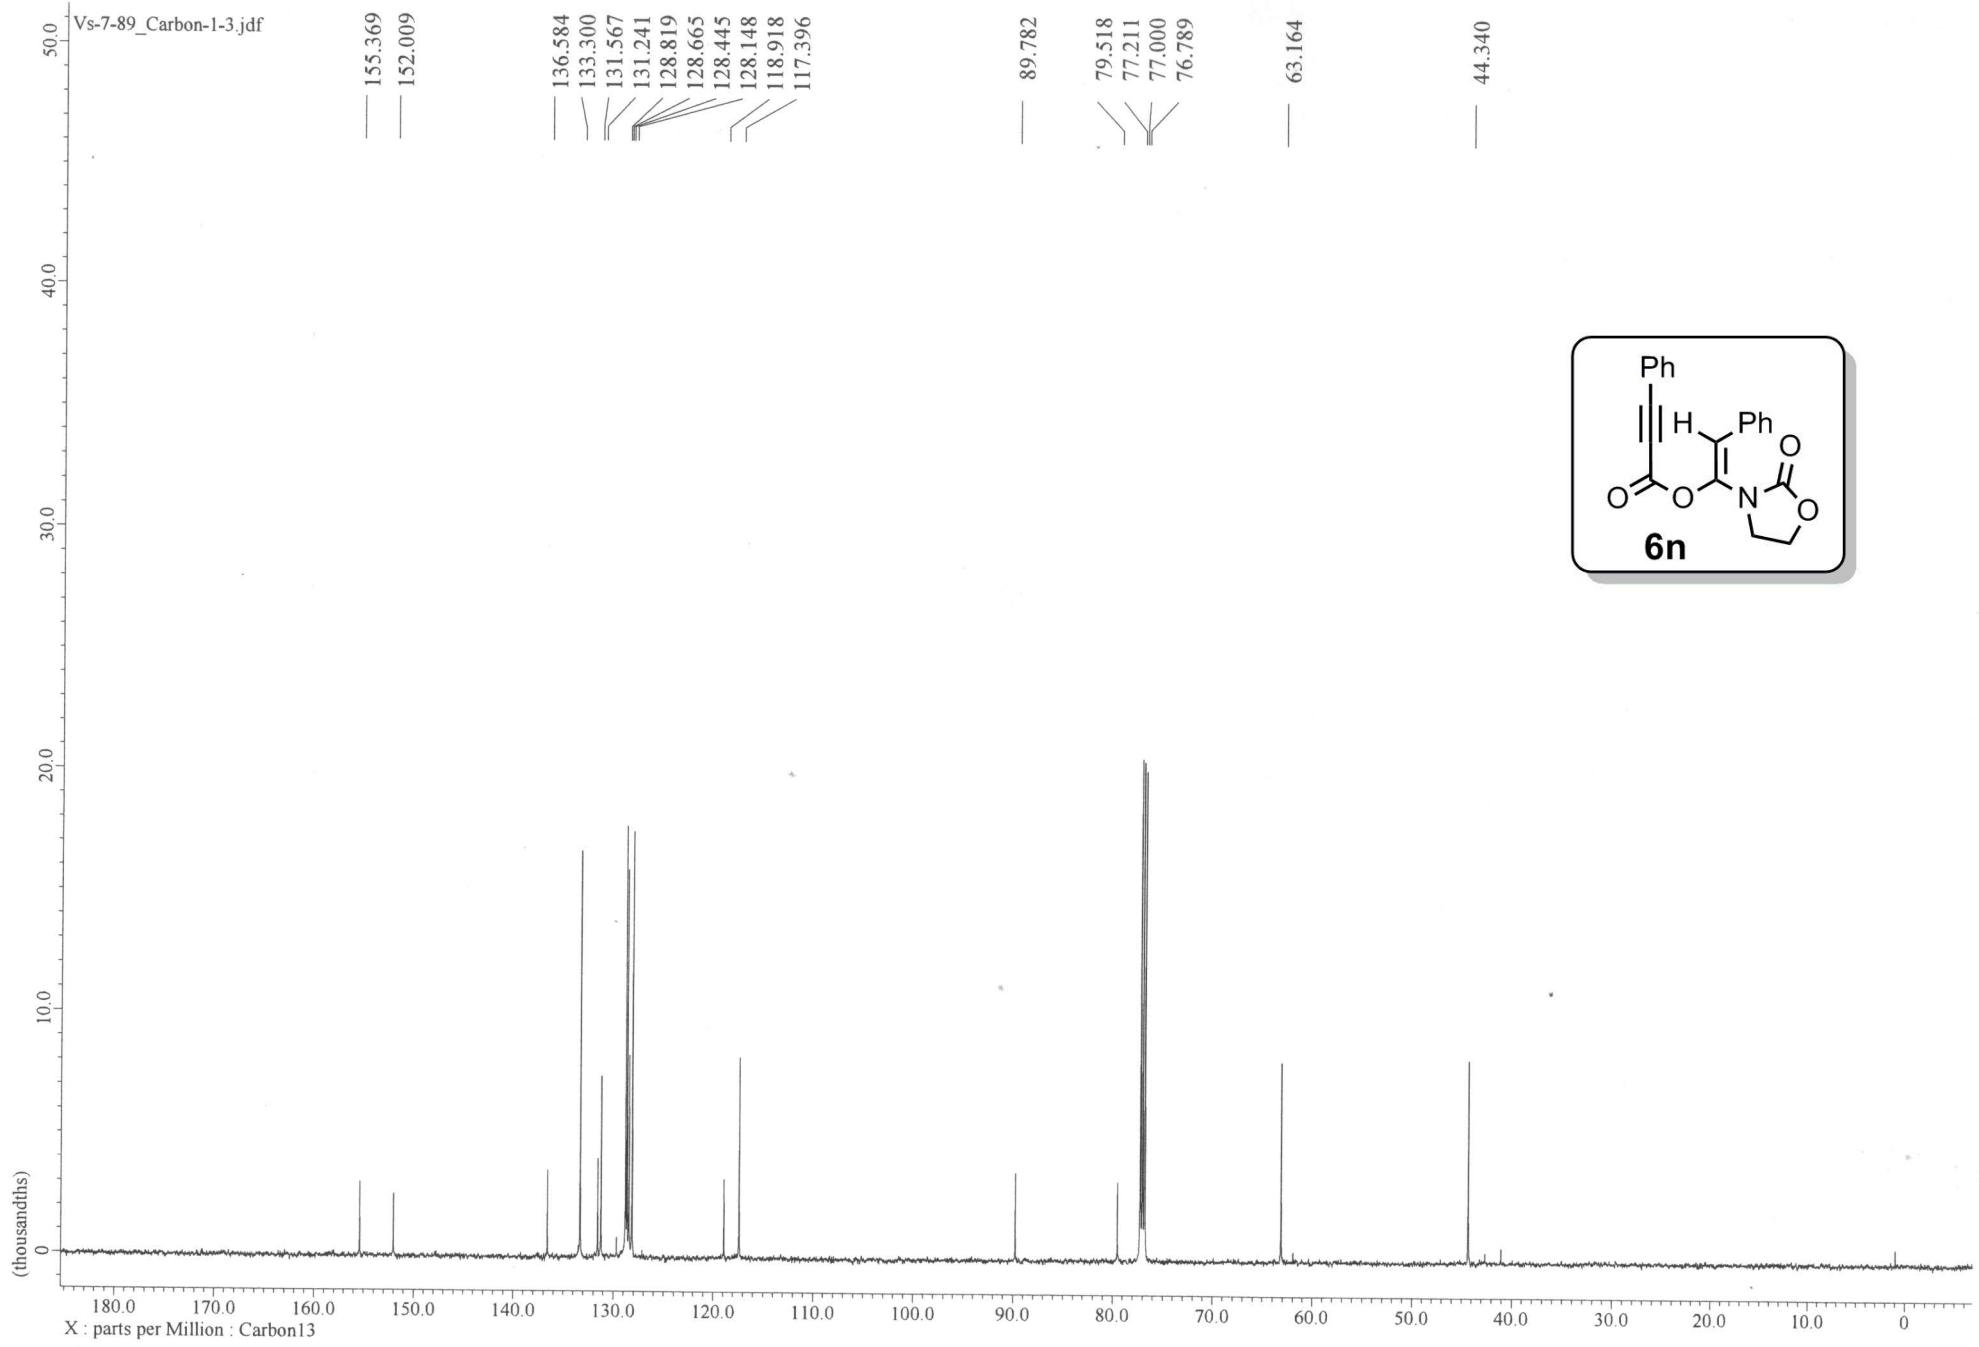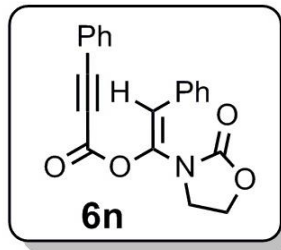

7.855  
7.834  
7.429  
7.424  
7.414  
7.409  
7.405  
7.394  
7.326  
7.320  
7.304  
7.300  
7.286  
7.283  
7.279  
7.275  
7.267  
7.265  
7.260  
7.208  
7.205  
7.188  
7.184  
7.172  
7.169  
7.136  
7.133  
7.130  
7.119  
7.115  
7.096  
7.070  
7.066  
7.049  
6.624  
6.615  
5.702  
5.694  
5.583  
5.574  
5.566  
5.136  
4.291  
4.288  
4.260  
4.257  
4.120  
4.115  
4.089  
4.084  
2.466

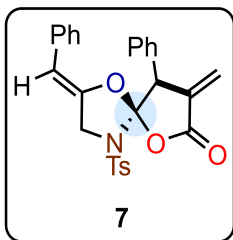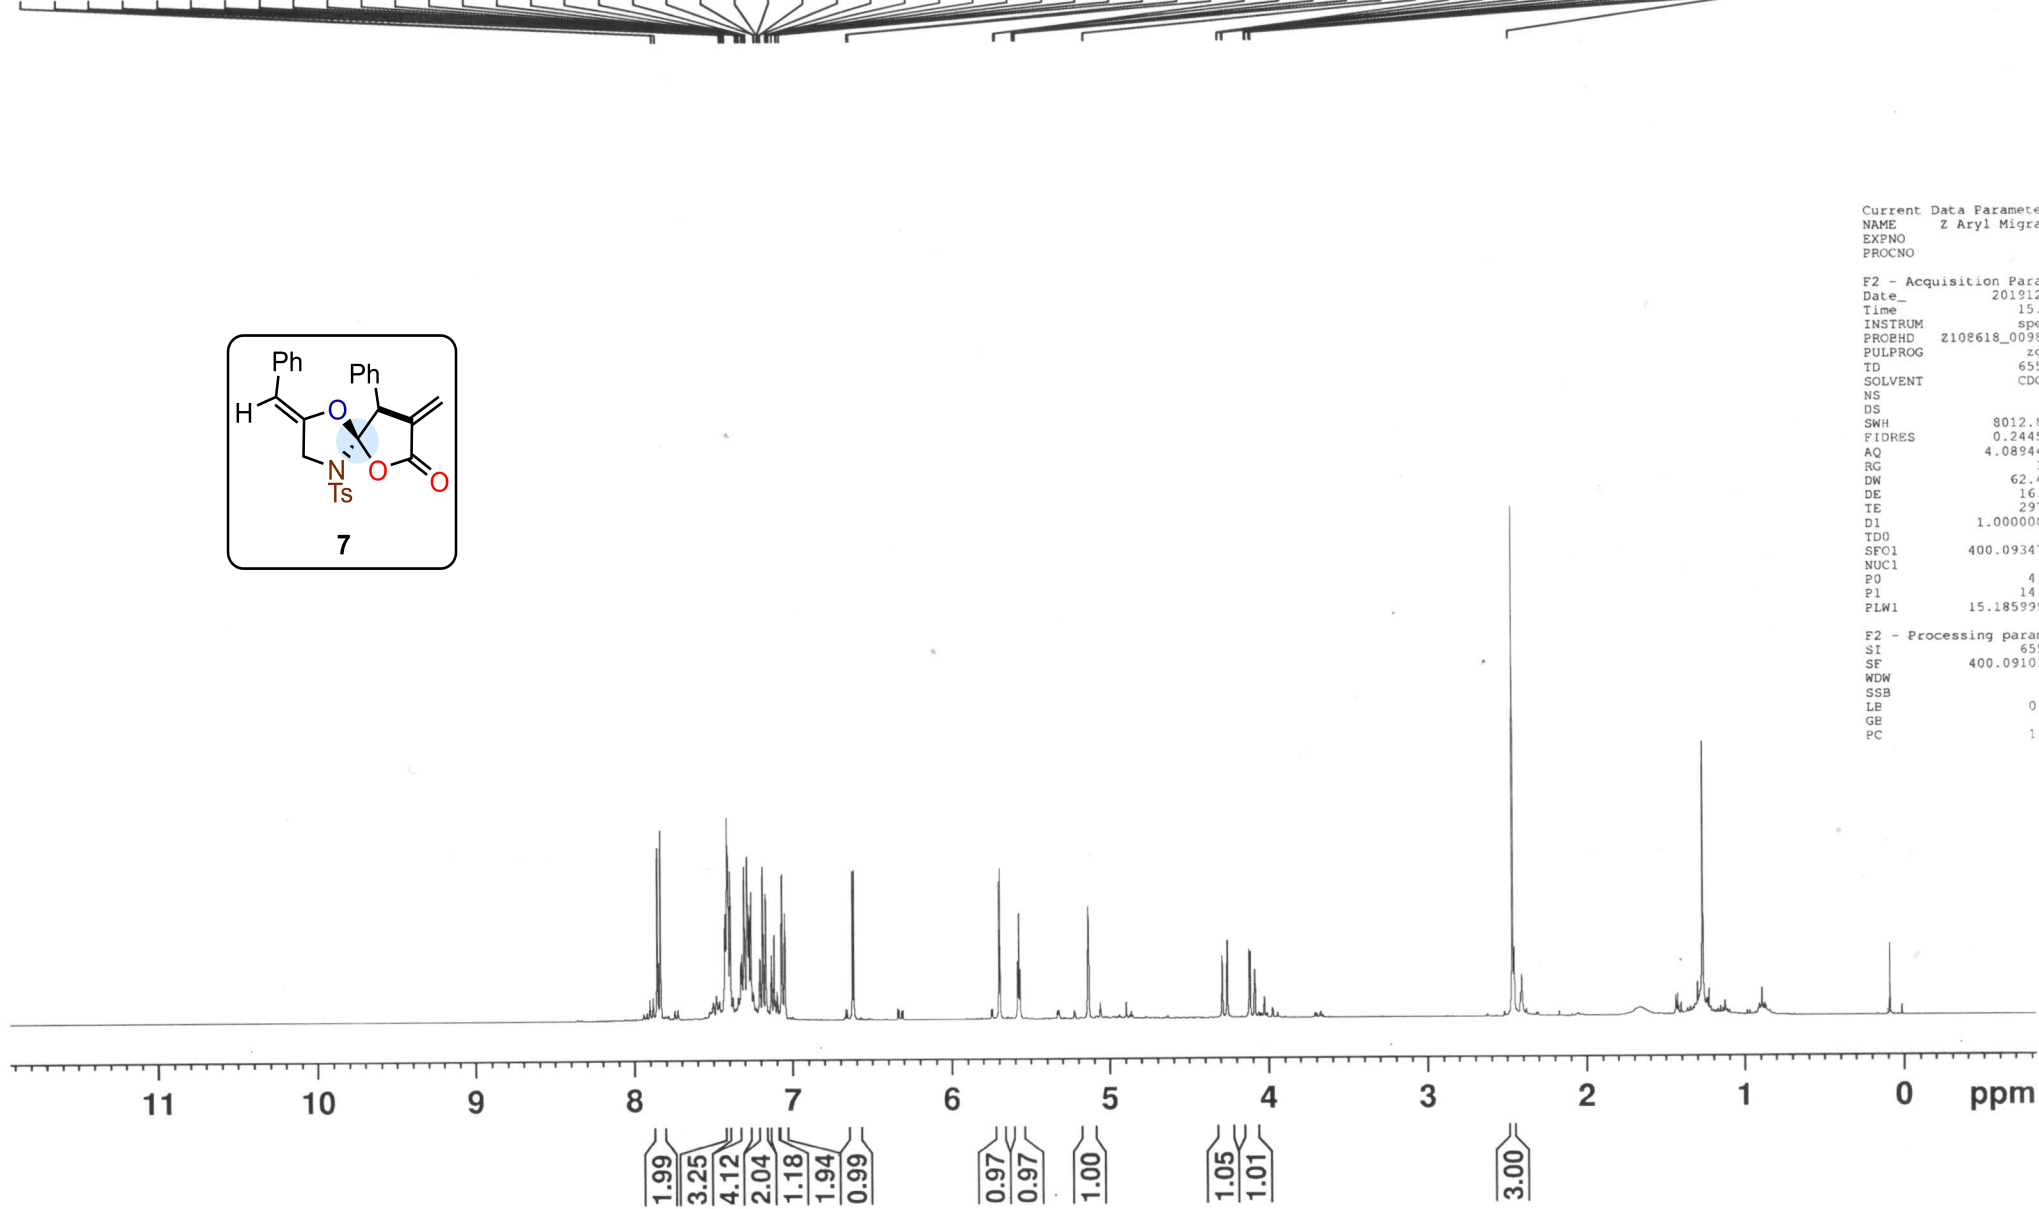

Current Data Parameters  
 NAME 2 Aryl Migra  
 EXPNO  
 PROCNO  
 F2 - Acquisition Parameters  
 Date\_ 201912  
 Time 15.  
 INSTRUM spe  
 PROBHD Z102618\_0098  
 PULPROG zg  
 TD 655  
 SOLVENT CDC  
 NS  
 DS  
 SWH 8012.8  
 FIDRES 0.2445  
 AQ 4.08944  
 RG 1  
 DW 62.4  
 DE 16.  
 TE 297  
 D1 1.000000  
 TD0  
 SFO1 400.09347  
 NUC1  
 P0 4.  
 P1 14.  
 PLW1 15.185999  
 F2 - Processing parameters  
 SI 655  
 SF 400.09101  
 WDW  
 SSB  
 LB 0.  
 GB  
 PC 1

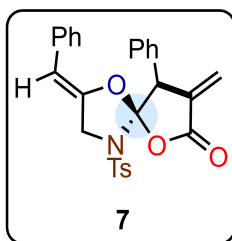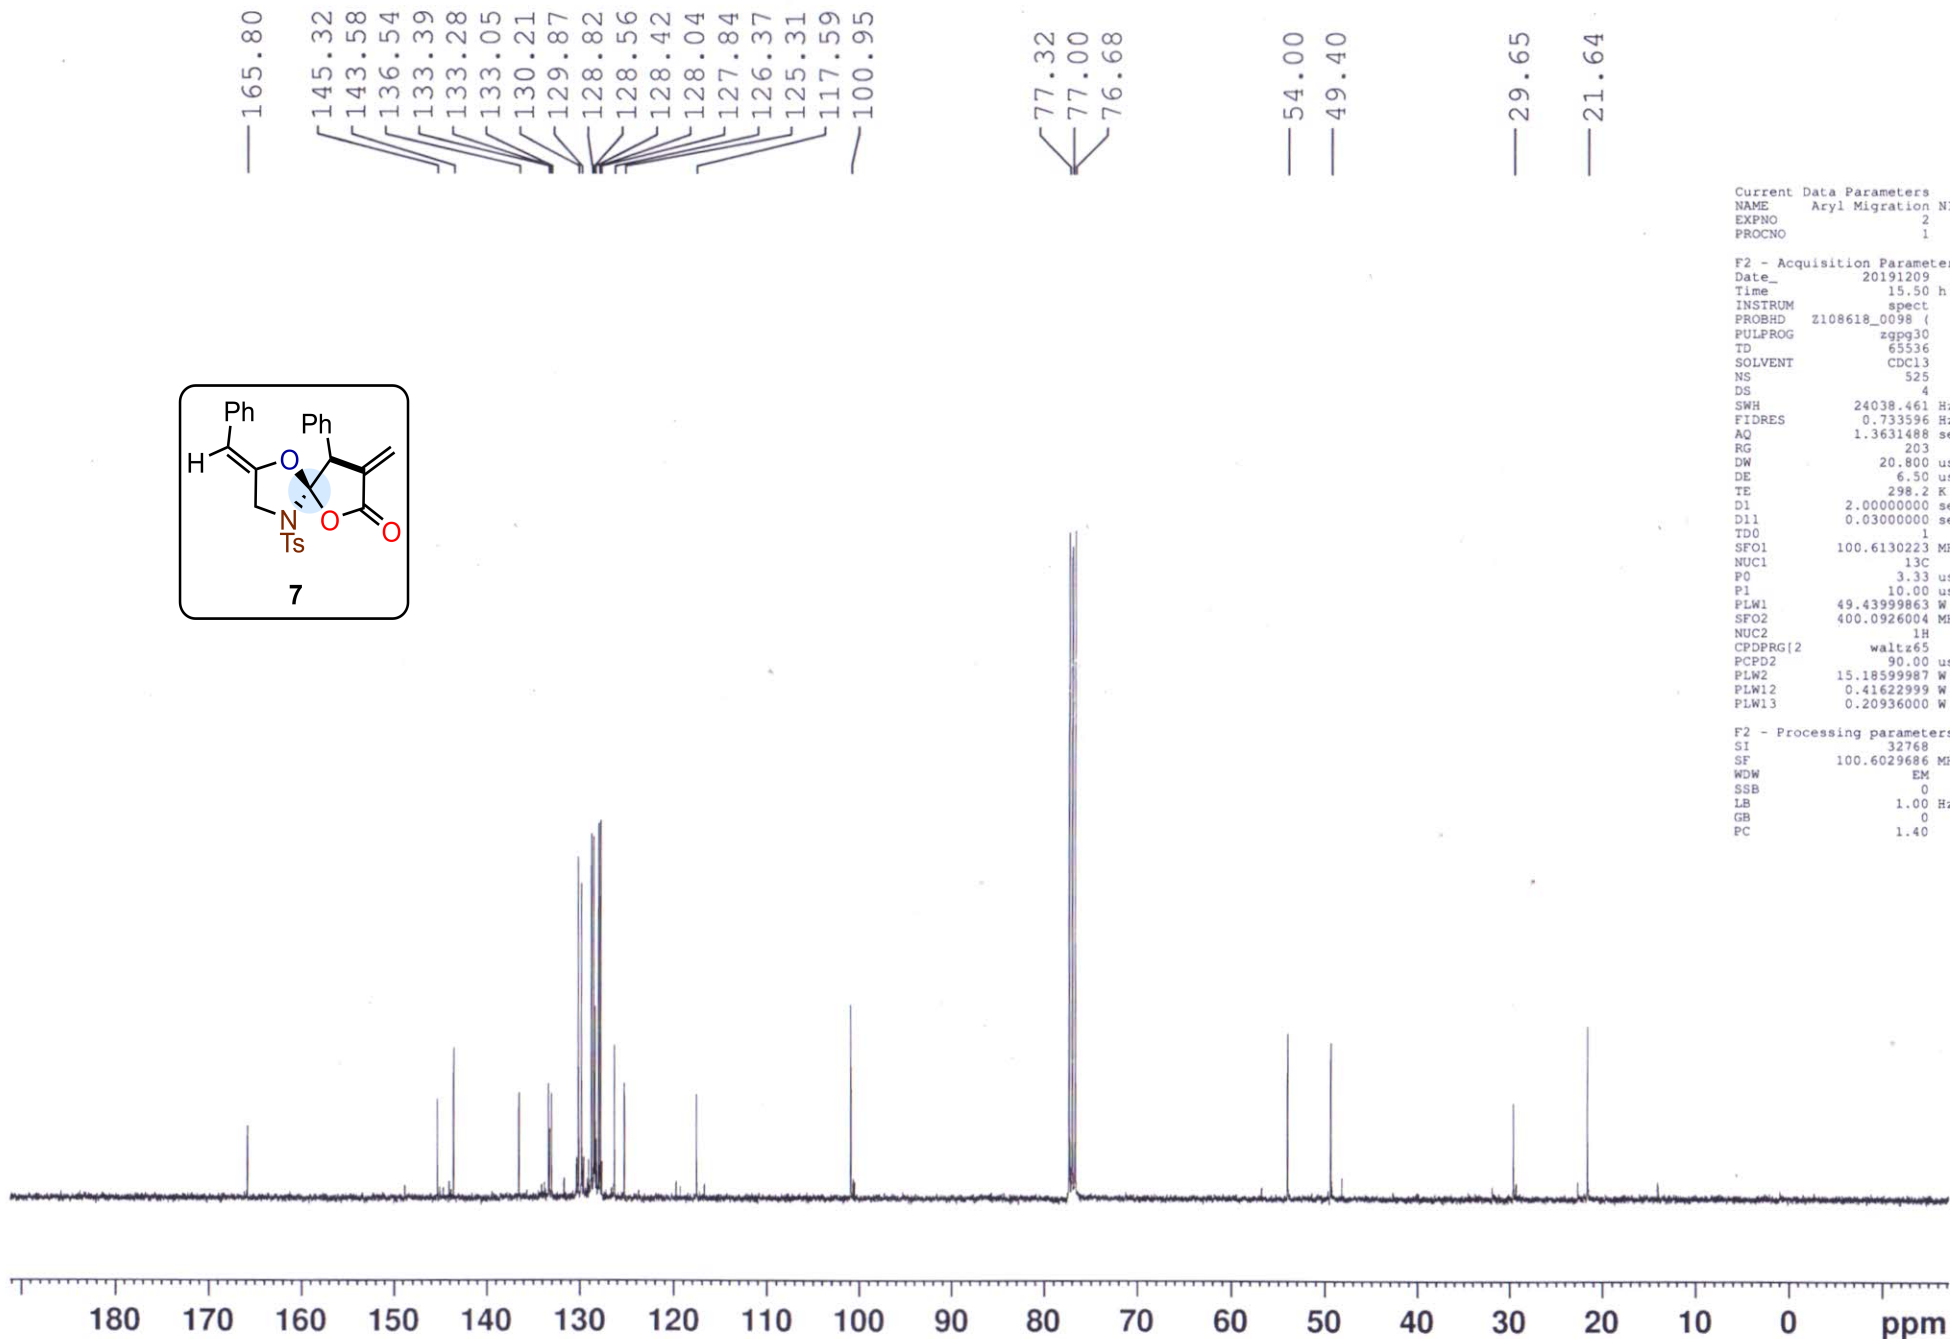

Current Data Parameters  
NAME Aryl Migration NIS  
EXPNO 2  
PROCNO 1

F2 - Acquisition Parameters  
Date\_ 20191209  
Time 15.50 h  
INSTRUM spect  
PROBHD z108618\_0098 ( )  
PULPROG zgpg30  
TD 65536  
SOLVENT CDCl3  
NS 525  
DS 4  
SWH 24038.461 Hz  
FIDRES 0.733596 Hz  
AQ 1.3631488 sec  
RG 203  
DW 20.800 usec  
DE 6.50 usec  
TE 298.2 K  
D1 2.00000000 sec  
D11 0.03000000 sec  
TD0 1  
SFO1 100.6130223 MHz  
NUC1 13C  
P0 3.33 usec  
P1 10.00 usec  
PLW1 49.43999863 W  
SFO2 400.0926004 MHz  
NUC2 1H  
CPDPRG[2] waltz65  
PCPD2 90.00 usec  
PLW2 15.18599987 W  
PLW12 0.41622999 W  
PLW13 0.20936000 W

F2 - Processing parameters  
SI 32768  
SF 100.6029686 MHz  
WDW EM  
SSB 0  
LB 1.00 Hz  
GB 0  
PC 1.40

SI 41

7.919  
7.902  
7.414  
7.398  
7.304  
7.301  
7.297  
7.295  
7.289  
7.285  
7.281  
7.279  
7.268  
7.263  
7.259  
7.256  
7.252  
7.249  
7.244  
7.241  
7.236  
7.231  
7.214  
7.210  
7.197  
7.190  
7.186  
7.144  
7.142  
7.139  
7.127  
7.115  
7.113  
7.110  
7.088  
7.073  
7.059  
6.963  
6.946  
6.928  
6.512  
6.508  
5.793  
5.788  
5.039  
4.127  
4.124  
4.102  
4.099  
3.973  
3.971  
3.948  
3.946  
2.476

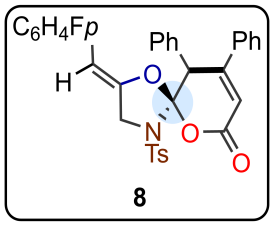

Current Data Parameters  
 NAME RP Updated 500  
 EXPNO 63  
 PROCNO 1

F2 - Acquisition Parameters  
 Date\_ 20211224  
 Time 16.48 h  
 INSTRUM spect  
 PROBHD Z109128\_0042 ( )  
 PULPROG zg30  
 ID 65536  
 SOLVENT CDCl3  
 NS 16  
 DS 2  
 SWH 10000.000 H  
 FIDRES 0.305176 H  
 AQ 3.2767999 s  
 RG 128  
 DW 50.000 u  
 DE 13.04 u  
 TE 296.7 K  
 D1 1.00000000 s  
 TDO 1  
 SFO1 500.182088 M  
 NUC1 1H  
 P0 5.00 u  
 P1 15.00 u  
 PLW1 4.84679985 W

F2 - Processing parameters  
 SI 65536  
 SF 500.1800000 M  
 WDW EM  
 SSB 0  
 LB 0.30 H  
 GB 0  
 PC 1.00

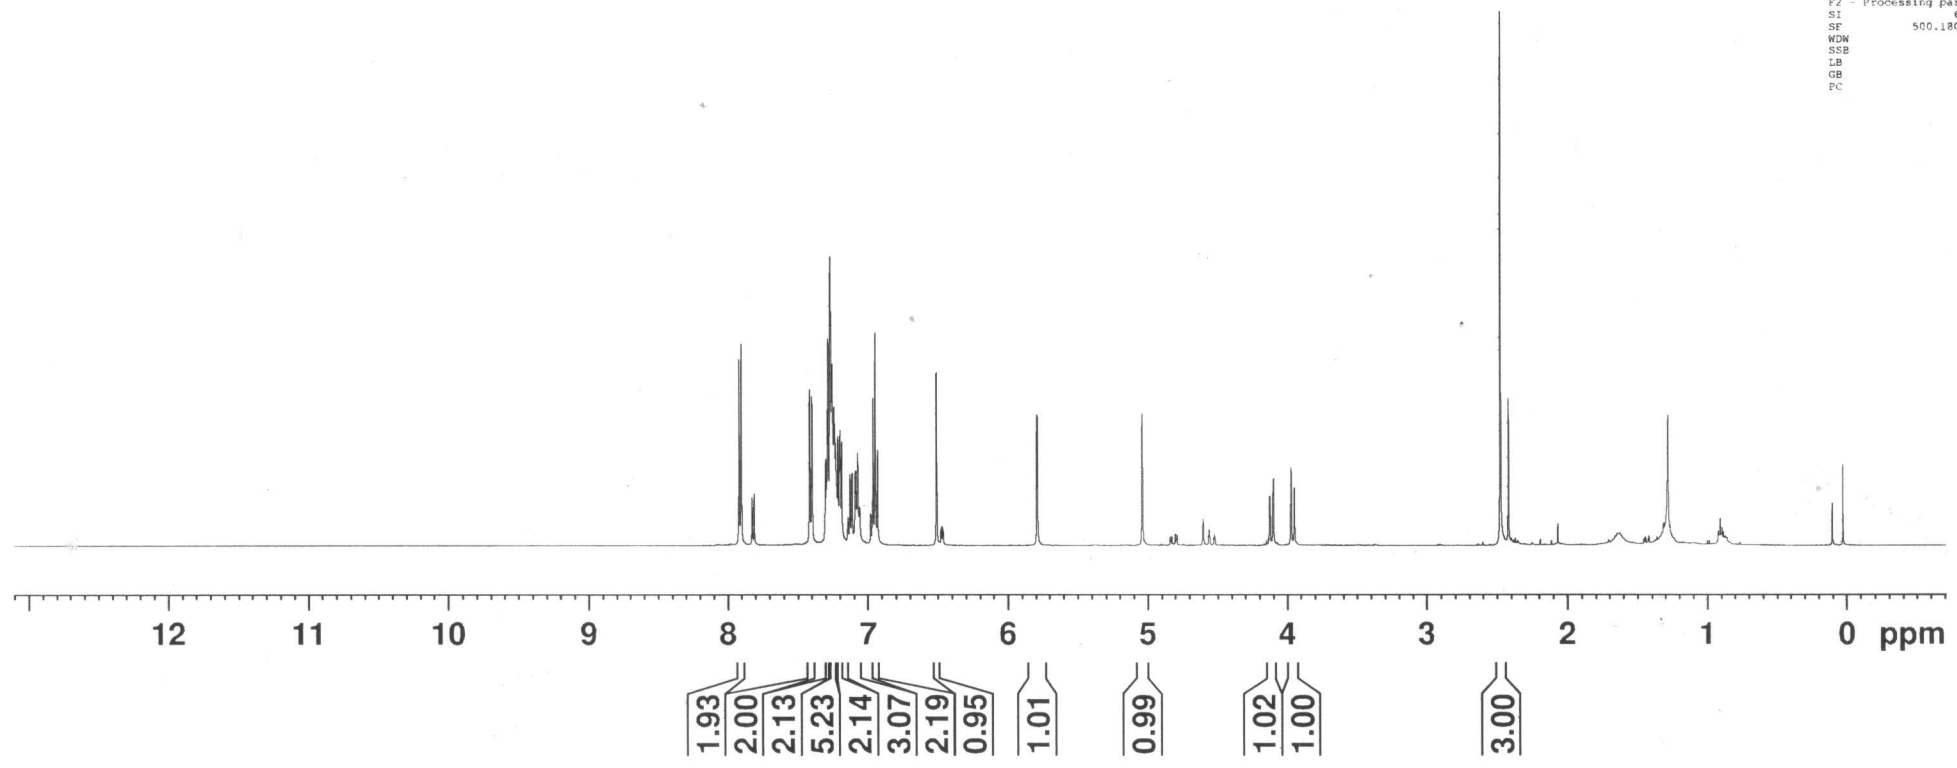

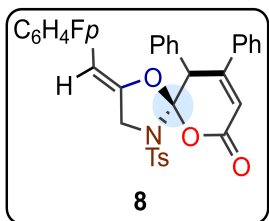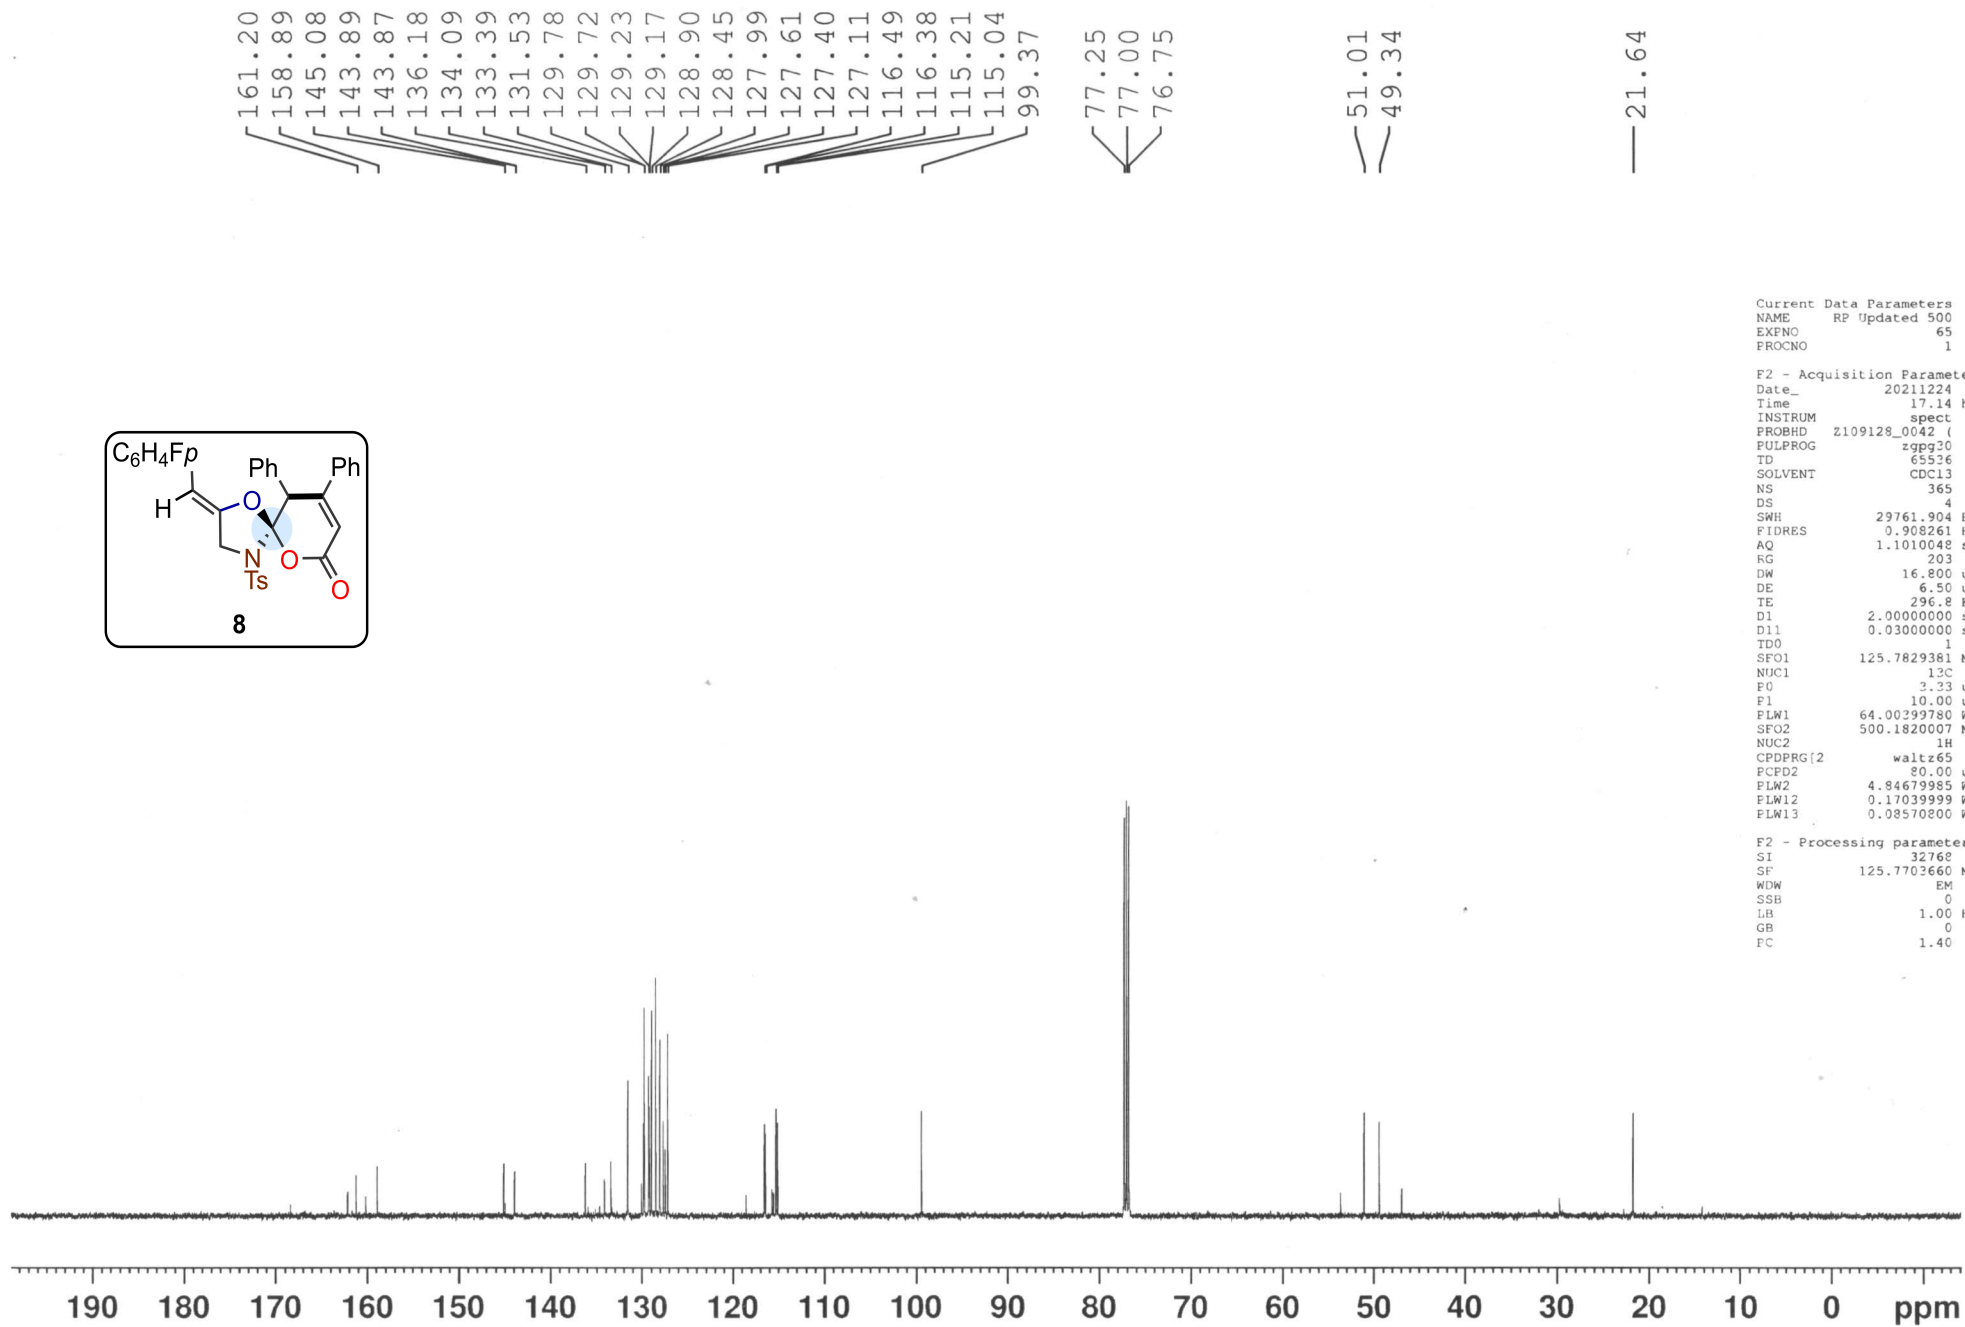

```

Current Data Parameters
NAME      RP Updated 500
EXPNO    65
PROCNO    1

F2 - Acquisition Parameters
Date_     20211224
Time      17.14 h
INSTRUM   spect
PROBHD    Z109128_0042 (
PULPROG   zgpg30
TD         65536
SOLVENT   CDCl3
NS         365
DS         4
SWH        29761.904 Hz
FIDRES     0.908261 Hz
AQ         1.1010048 sec
RG         203
DW         16.800 usec
DE         6.50 usec
TE         296.8 K
D1         2.00000000 sec
D11        0.03000000 sec
TD0        1
SFO1       125.7829381 MHz
NUC1       13C
F0         2.23 usec
F1         10.00 usec
FLW1       64.00299780 W
SFO2       500.1820007 MHz
NUC2       1H
CPDPRG[2] waltz65
PCPD2      80.00 usec
FLW2       4.84679985 W
FLW12      0.17039999 W
FLW13      0.08570800 W

F2 - Processing parameters
SI         32768
SF         125.7702660 MHz
WDW        EM
SSB        0
LB         1.00 Hz
GB         0
FC         1.40
  
```

— -110.48

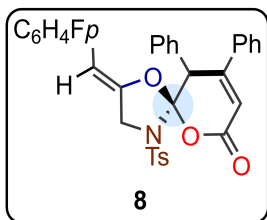

Current Data Parameters  
NAME RP Updated 400  
EXPNO 45  
PROCNO 1

F2 - Acquisition Parameters  
Date\_ 20211129  
Time 16.18 h  
INSTRUM spect  
PROBHD z108618\_0098 (   
PULPROG zgfhigqn.2  
TD 131072  
SOLVENT CDC13  
NS 16  
DS 4  
SWH 89285.711 Hz  
FIDRES 1.362392 Hz  
AQ 0.7340032 sec  
RG 724  
DW 5.600 usec  
DE 6.50 usec  
TE 722.7 K  
D1 1.00000000 sec  
D11 0.03000000 sec  
D12 0.00002000 sec  
TD0 1  
SFO1 376.4240234 MHz  
NUC1 19F  
P1 14.80 usec  
PLW1 18.11000061 W  
SFO2 400.0926004 MHz  
NUC2 1H  
CPDPRG[2] waltz16  
PCPD2 90.00 usec  
PLW2 15.18599987 W  
PLW12 0.41622999 W

F2 - Processing parameters  
SI 65536  
SF 376.4616700 MHz  
WDW EM  
SSB 0  
LB 0.30 Hz  
GB 0  
PC 1.00

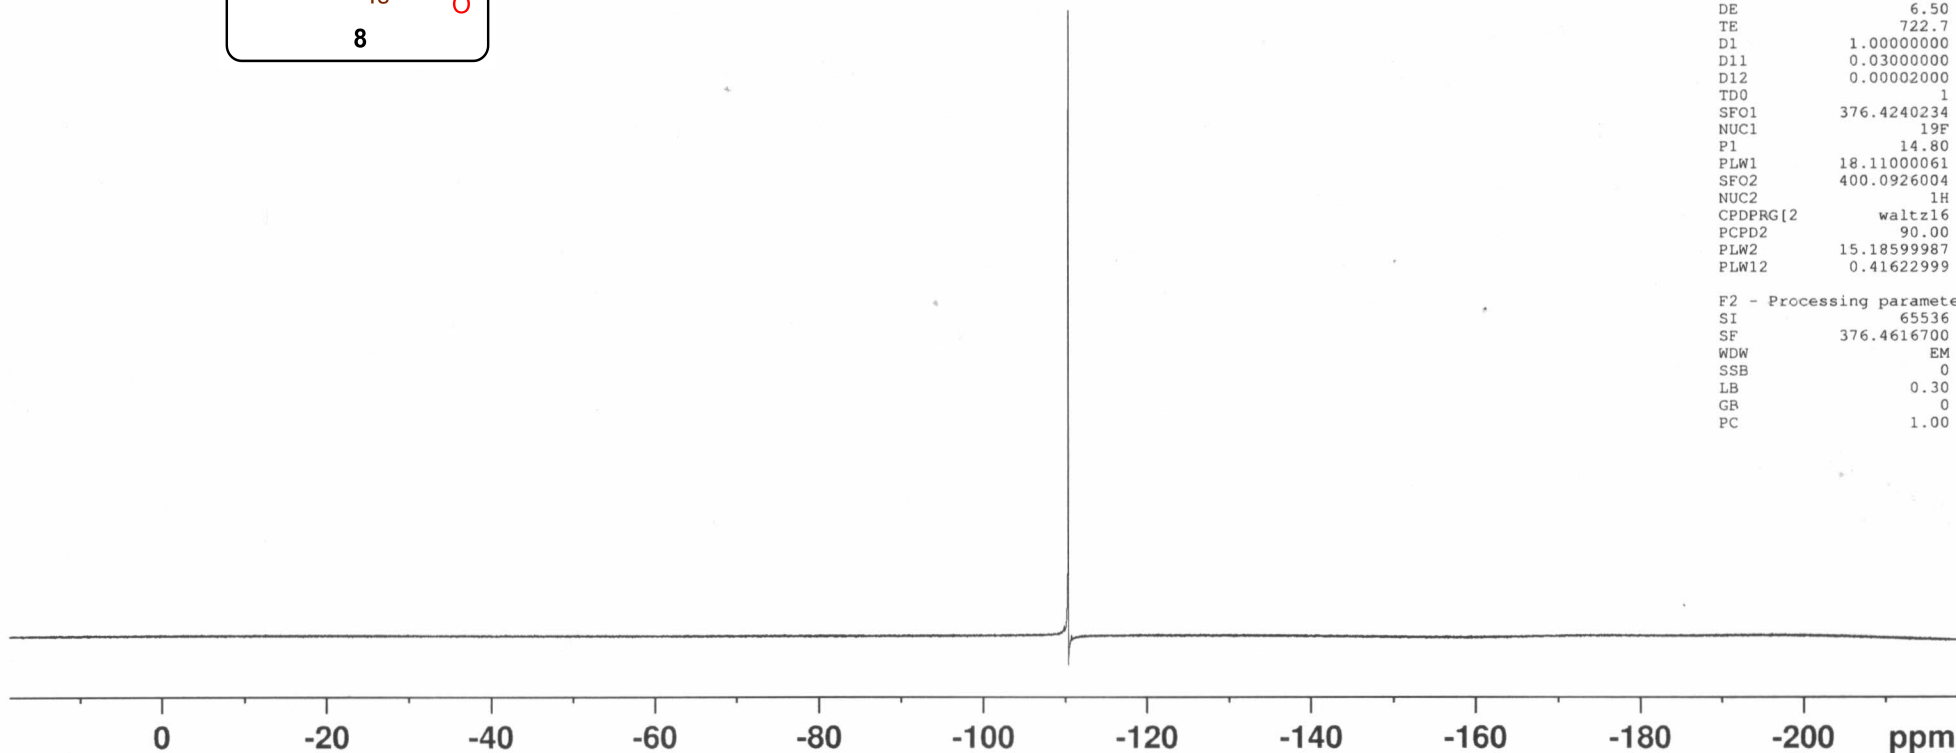

Supplement: d2nj01907h1.pdf [file d2nj01907h1.pdf]
